# Supplementary material
Source: PubMed Central journal article supplement (PMC2737074)
Supplement: NIHMS134088-supplement-1_si_001.pdf [file NIHMS134088-supplement-1_si_001.pdf]

Supporting Information for

**Three-Coordinate and Four-Coordinate Cobalt Hydride Complexes That React  
with Dinitrogen**

Keying Ding, William W. Brennessel, and Patrick L. Holland\*

|                                                    |              |
|----------------------------------------------------|--------------|
| <b>General Considerations</b>                      | <b>S-2</b>   |
| <b>Synthesis and Characterization of 1 and 1-D</b> | <b>S-3</b>   |
| <b>Synthesis and Characterization of 2 and 2-D</b> | <b>S-7</b>   |
| <b>Synthesis of LCoCy</b>                          | <b>S-13</b>  |
| <b>Activation of N<sub>2</sub> by 1</b>            | <b>S-14</b>  |
| <b>Activation of N<sub>2</sub> by 2</b>            | <b>S-17</b>  |
| <b>GC detection of H<sub>2</sub></b>               | <b>S-19</b>  |
| <b>References</b>                                  | <b>S-22</b>  |
| <b>Crystal Structure of 1</b>                      | <b>S-23</b>  |
| <b>Crystal Structure of 2</b>                      | <b>S-96</b>  |
| <b>Crystal Structure of LCoCy</b>                  | <b>S-144</b> |

**General Considerations.** All manipulations were performed under argon atmosphere in an M. Braun glove box maintained at or below 1 ppm of O<sub>2</sub>, or by Schlenk techniques. Glassware was dried at 150 °C overnight. NMR data were recorded on a Bruker Avance 400 or 500 MHz spectrometer. All peaks in the NMR spectra are singlets, referenced to residual C<sub>6</sub>D<sub>5</sub>H at  $\delta$  7.16 ppm. In some cases, it was not possible to determine integrations because of peak overlap. IR spectra were recorded on a Mattson Instruments 6020 Galaxy Series FTIR, with a resolution of 4 cm<sup>-1</sup>. UV-vis spectra were measured on a Cary 50 spectrophotometer, using screw-cap cuvettes. Solution magnetic susceptibilities were determined by the Evans method.<sup>1</sup> Elemental analyses were determined by Columbia Analytical Services, Tucson, AZ. The nitrogen and carbon analysis on the extremely sensitive compounds reported here was often low, probably from some decomposition during transport and/or handling. Sample purity was verified by integrating the NMR resonances against an internal integration standard of a capillary of LFeCl,<sup>2</sup> which typically indicated > 90% of the expected integration (except **1**, as described below).

Pentane, diethyl ether and toluene were purified by passage through activated alumina and "deoxygenizer" columns from Glass Contour Co. Deuterated benzene was first dried over CaH<sub>2</sub>, then over Na/benzophenone, and then vacuum transferred into a storage container. Before use, an aliquot of each solvent was tested with a drop of sodium benzophenone ketyl in THF solution. Celite was dried overnight at 200 °C under vacuum. The preparation of LCoCl has been reported.<sup>3</sup> Cyclohexene (Aldrich) was degassed, vacuum transferred to a new container and stored over molecular sieves in the glovebox at -35 °C. KHBet<sub>3</sub> was synthesized by a literature procedure from KH and BEt<sub>3</sub>,<sup>4</sup> and KDBet<sub>3</sub> was synthesized in an analogous fashion using KD. KD was purchased from AECR. Naphthalene was purified by vacuum sublimation.

**Synthesis and Characterization of [LCoH]<sub>2</sub> (1).** In an argon-filled glove box, a resealable flask was charged with LCoCl (169 mg, 0.283 mmol) and KHBET<sub>3</sub> (39.0 mg, 0.283 mmol). The headspace was evacuated, and toluene (18 mL) was vacuum transferred into the flask at 77 K. The flask was warmed to room temperature and the mixture was stirred while allowing it to slowly warm. After 15 min, the volatile materials were removed under vacuum. In an argon-filled glovebox, the residue was extracted with 10 mL pentane, and filtered through Celite to give a yellow solution which was concentrated to 6 mL. Toluene (4 mL) was added, and the solution was cooled to -35 °C to give dark yellow crystals (114 mg, 72%). <sup>1</sup>H NMR (C<sub>6</sub>D<sub>6</sub>, 295 K): δ 22.9, 18.2, 3.2, 1.6, -9.8, -17.6 ppm. (See Figure S-1 for the room-temperature <sup>1</sup>H NMR spectrum, demonstrating the presence of impurities; see Figure S-2 for variable-temperature <sup>1</sup>H NMR spectra.)  $\mu_{\text{eff}}$ (Evans, C<sub>6</sub>D<sub>6</sub>, 295 K) = 6.4(4)  $\mu_{\text{B}}$ . UV-vis (pentane): 920 ( $\epsilon = 4400 \text{ M}^{-1}\text{cm}^{-1}$ ), 519 ( $\epsilon = 11300 \text{ M}^{-1}\text{cm}^{-1}$ ) nm. Anal. Calcd. for C<sub>70</sub>H<sub>108</sub>N<sub>4</sub>Co<sub>2</sub>: C 74.83, H 9.69, N 4.99. Found: C 74.25, H 8.98, N 4.02. The synthesis of **1-D** used an analogous procedure with KDBET<sub>3</sub>. The <sup>1</sup>H NMR and IR spectra of **1** and of **1-D** were identical (Figures S-3 and S-4).

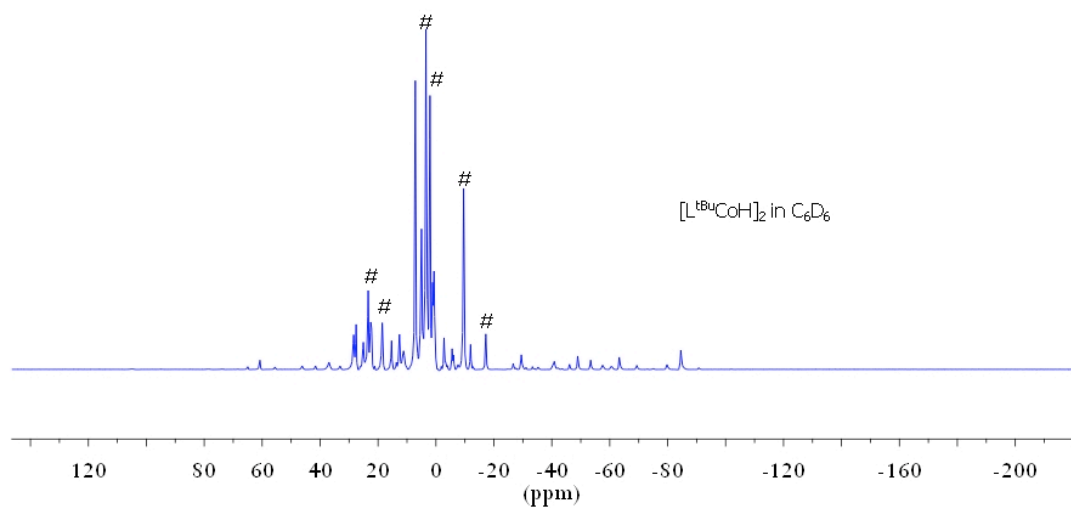

**Figure S-1.**  $^1\text{H}$  NMR spectrum of **1** in  $\text{C}_6\text{D}_6$ . Peaks labeled # are assigned to **1**, because these are the only peaks that change upon addition of  $\text{N}_2$ .

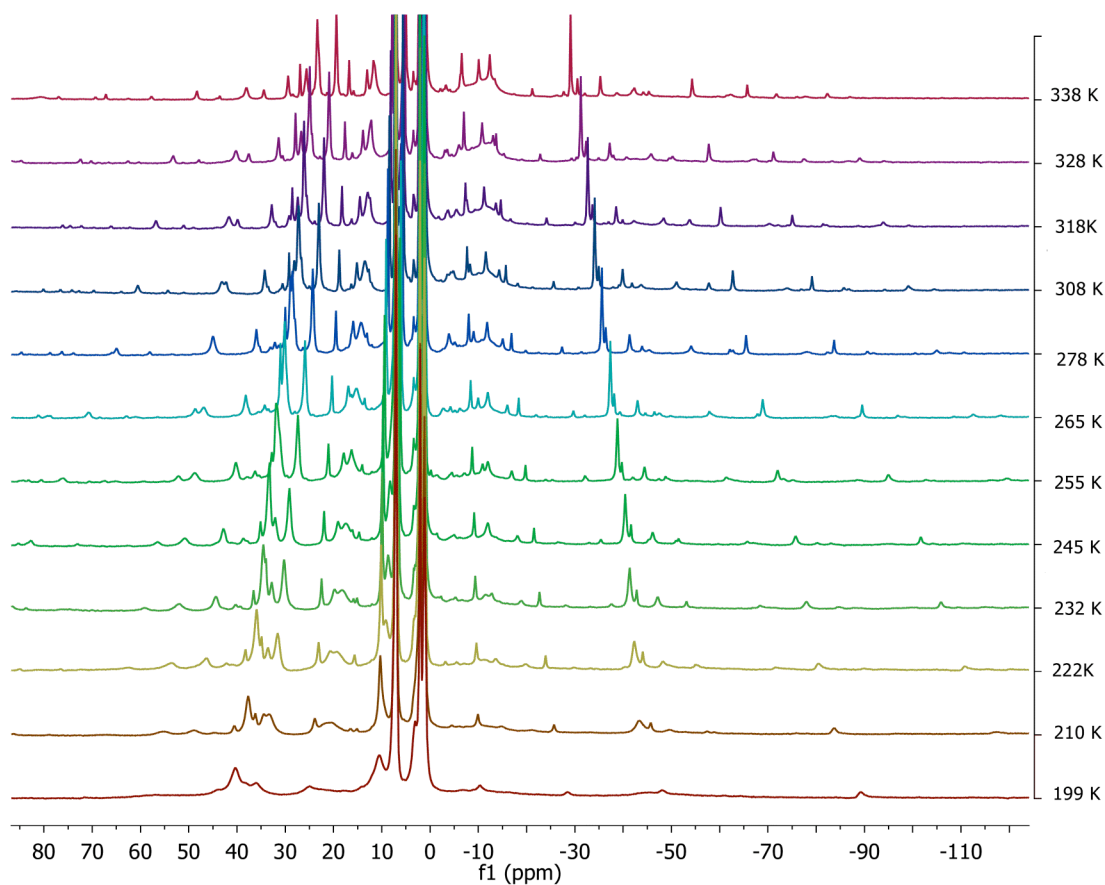

**Figure S-2.** Variable-temperature  $^1\text{H}$  NMR spectra of a solution of **1** in toluene- $d_8$ . The only major change is greater broadening and shifting at low temperature because of the higher magnetism (as expected from the Curie Law).

The FTIR spectra of **1** and **1-D** were identical, and showed no obvious Co-H stretching band.

KBr: 2954 (s), 2929 (m), 1523 (w), 1460 (m), 1378 (s), 1356 (s), 1310 (s), 1218 (m), 1153 (w), 1089 (s), 798 (m), 756 (s)  $\text{cm}^{-1}$ .

**Figure S-3.** IR spectrum of **1**.

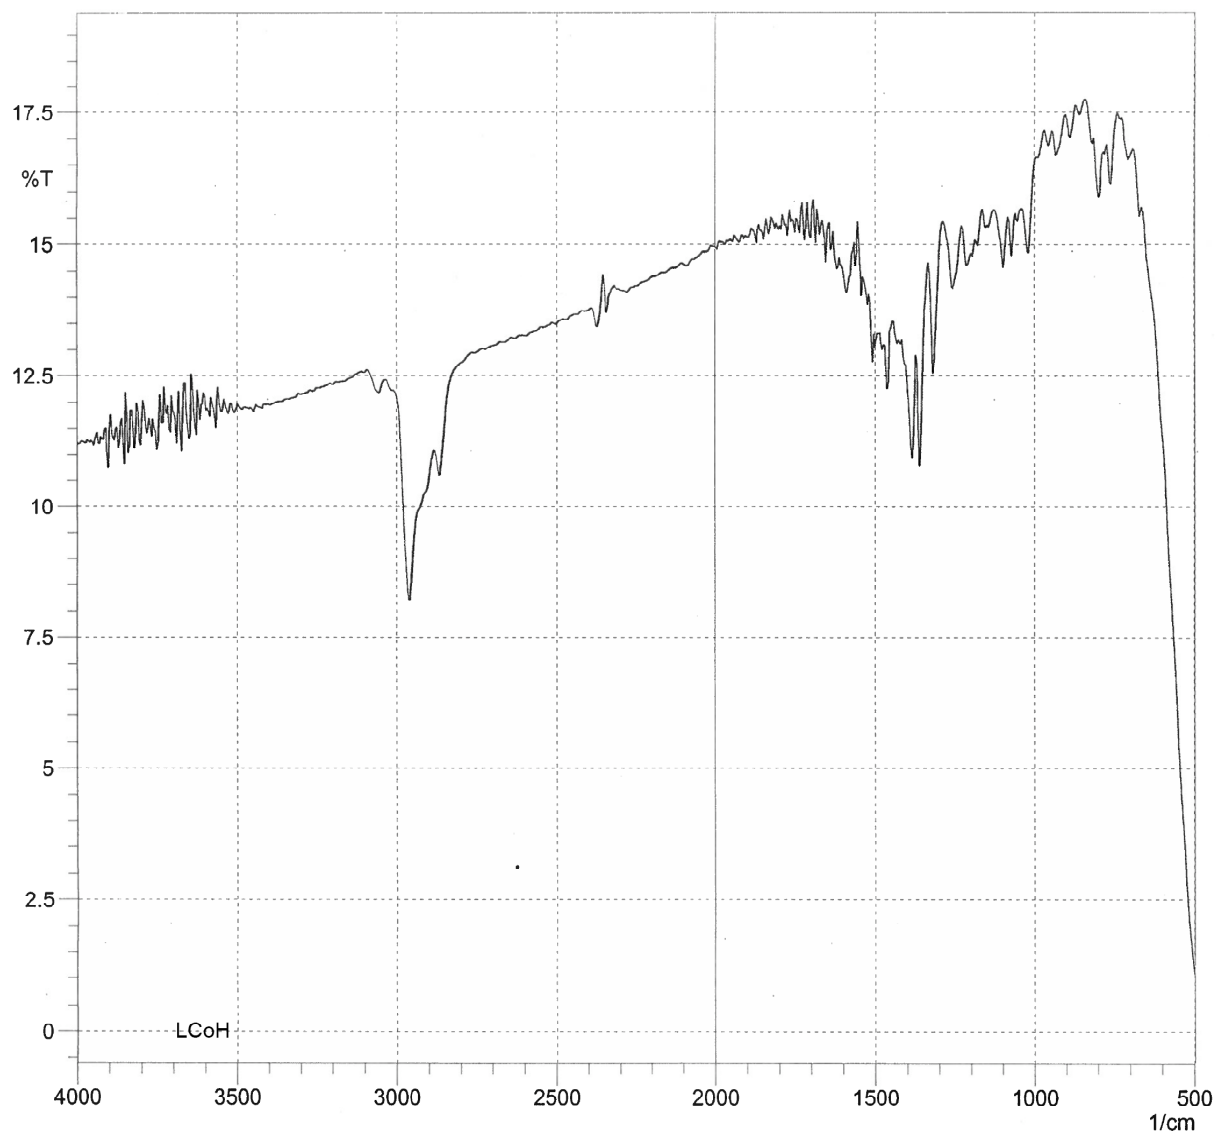

**Figure S-4.** IR spectrum of **1-D**.

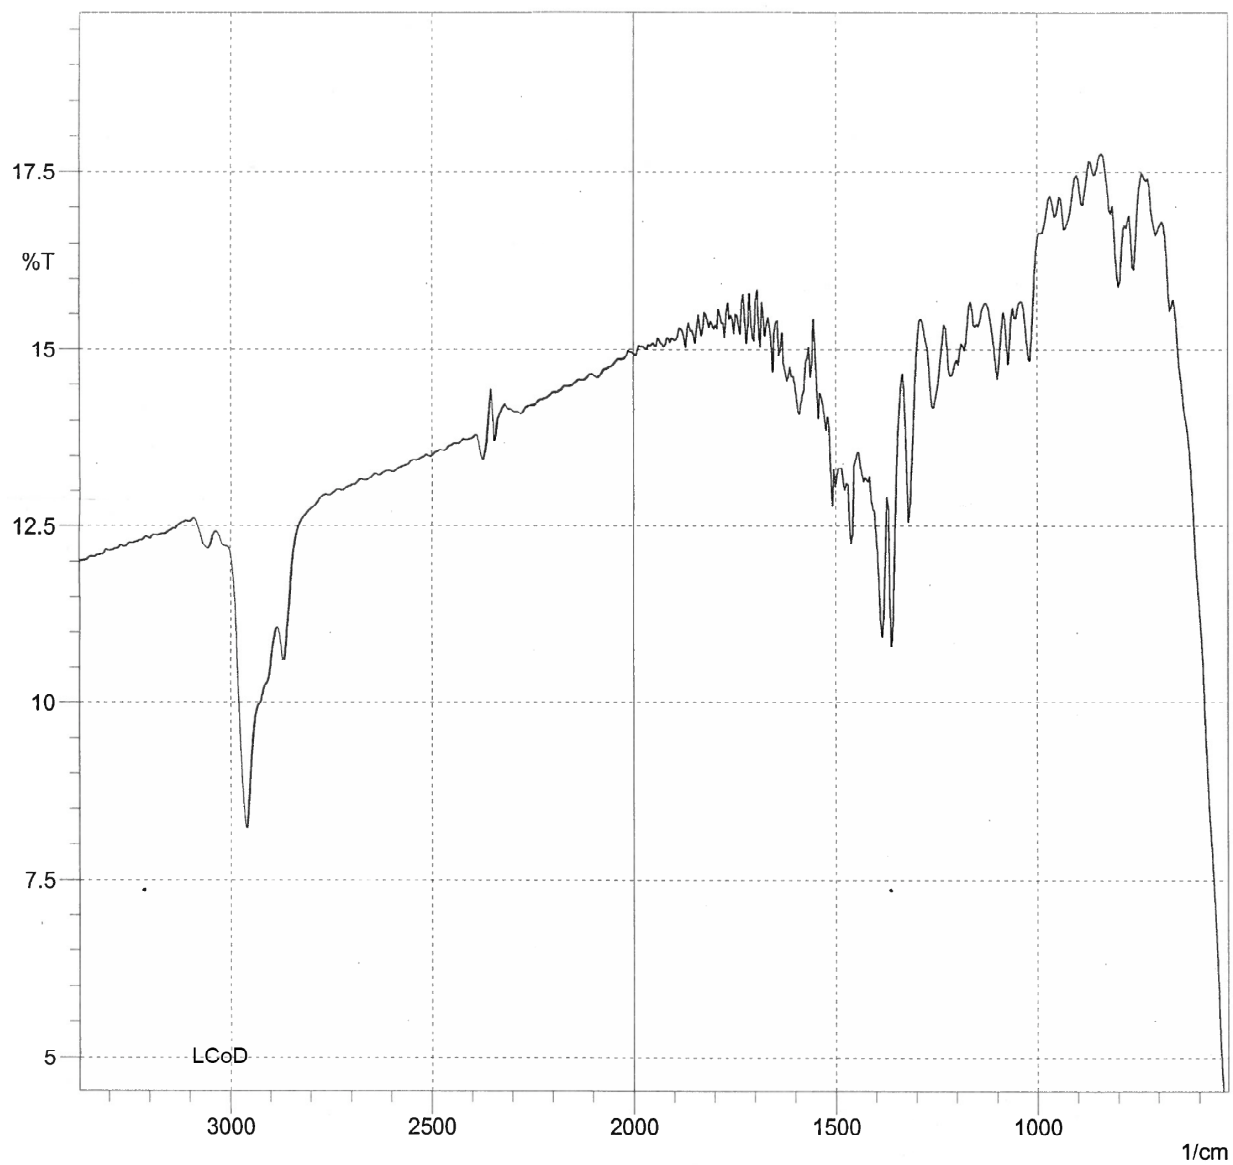

**Synthesis and Characterization of [KLC<sub>o</sub>H]<sub>2</sub> (2).** Under argon atmosphere, a solution of KHB<sub>e</sub>t<sub>3</sub> (106 mg, 0.769 mmol) in cold toluene (5 mL, -35 °C) was added to a stirred red-brown solution of LCoCl (231 mg, 0.387 mmol) in cold toluene (10 mL, -35 °C). The color changed to yellow-brown, then red-brown with the formation of white precipitate in a few minutes. The mixture was stirred for 15 minutes, followed by removal of volatile materials under vacuum to give a red-brown solid. The solid was extracted with pentane (10 mL) and filtered through Celite. Removal of volatile materials gave a red-brown solid which was then rinsed with cold pentane (2 mL) and was used without further purification (162 mg, 70%). Single crystals came from cooling a pentane/toluene solution. <sup>1</sup>H NMR (500 MHz, C<sub>6</sub>D<sub>6</sub>): δ 53.7 (8H, *m*-H or CH(CH<sub>3</sub>)<sub>2</sub>), 28.6 (8H, *m*-H or CH(CH<sub>3</sub>)<sub>2</sub>), 9.5 (24H, CH(CH<sub>3</sub>)<sub>2</sub>), -9.4 (36H, C(CH<sub>3</sub>)<sub>3</sub>), -13.7 (24H, CH(CH<sub>3</sub>)<sub>2</sub>), -50.7 (4H, *p*-H), -114.3 (2H, backbone C-H) ppm. The spectrum was similar in THF-*d*<sub>8</sub> and in cyclohexane-*d*<sub>12</sub> (Figure S-5), and showed little change with temperature (Figure S-6).  $\mu_{\text{eff}}$  (Evans, C<sub>6</sub>D<sub>6</sub>, 295 K): 5.6(2)  $\mu_{\text{B}}$ . Anal. Calcd. for K<sub>2</sub>C<sub>70</sub>H<sub>108</sub>N<sub>4</sub>Co<sub>2</sub>: C 69.96, H 9.06, N 4.66. Found C 70.02, H 9.20, N 4.28. UV-vis (pentane): 824 ( $\epsilon = 600 \text{ M}^{-1}\text{cm}^{-1}$ ), 707 ( $\epsilon = 2100 \text{ M}^{-1}\text{cm}^{-1}$ ), 560 ( $\epsilon = 200 \text{ M}^{-1}\text{cm}^{-1}$ ), 422 ( $\epsilon = 11100 \text{ M}^{-1}\text{cm}^{-1}$ ), 311 ( $\epsilon = 28900 \text{ M}^{-1}\text{cm}^{-1}$ ) nm. The synthesis of **2-D** used an analogous procedure with KDB<sub>e</sub>t<sub>3</sub>. The <sup>1</sup>H NMR and IR spectra of **2** and of **2-D** were identical (Figures S-7 and S-8).

**Solution Molecular Weight of 2.** A Schlenk flask was charged with **2** (11.9 mg) and naphthalene (92.7 mg) under argon. The mixture was warmed and melted until the cobalt complex completely dissolved. After cooling the waxy solid, a small portion was placed in three melting-point capillaries, each of which was sealed. This procedure was done with two different concentrations of **2**. Melting point depressions, compared to that of authentic naphthalene, were measured on a Thomas Hoover melting point apparatus, using a VWR Precision 0.01 Thermometer equipped with a Pt-100 $\Omega$  sensor. Molecular weights were determined using the formula: molecular weight =  $K \cdot w \cdot 1000 / \Delta T \cdot W$ , where  $K = 4.9$  for naphthalene,  $w =$  weight of **2**,  $W =$  weight of naphthalene and  $\Delta T =$  temperature depression.<sup>5</sup>

**Table S-1.** Molecular-weight measurements for **2**.

| Mass of <b>2</b> (mg) | Mass of naph. (mg) | Melting point ( $^{\circ}\text{C}$ ) | $\Delta T$ ( $^{\circ}\text{C}$ ) | Calcd. MW |
|-----------------------|--------------------|--------------------------------------|-----------------------------------|-----------|
| 11.9                  | 92.7               | 79.88                                | 0.52                              | 1210      |
| 11.9                  | 92.7               | 79.82                                | 0.58                              | 1084      |
| 11.9                  | 92.7               | 79.81                                | 0.59                              | 1068      |
| 16.2                  | 80.1               | 79.51                                | 0.89                              | 1113      |
| 16.2                  | 80.1               | 79.60                                | 0.80                              | 1232      |
| 16.2                  | 80.1               | 79.53                                | 0.87                              | 1139      |



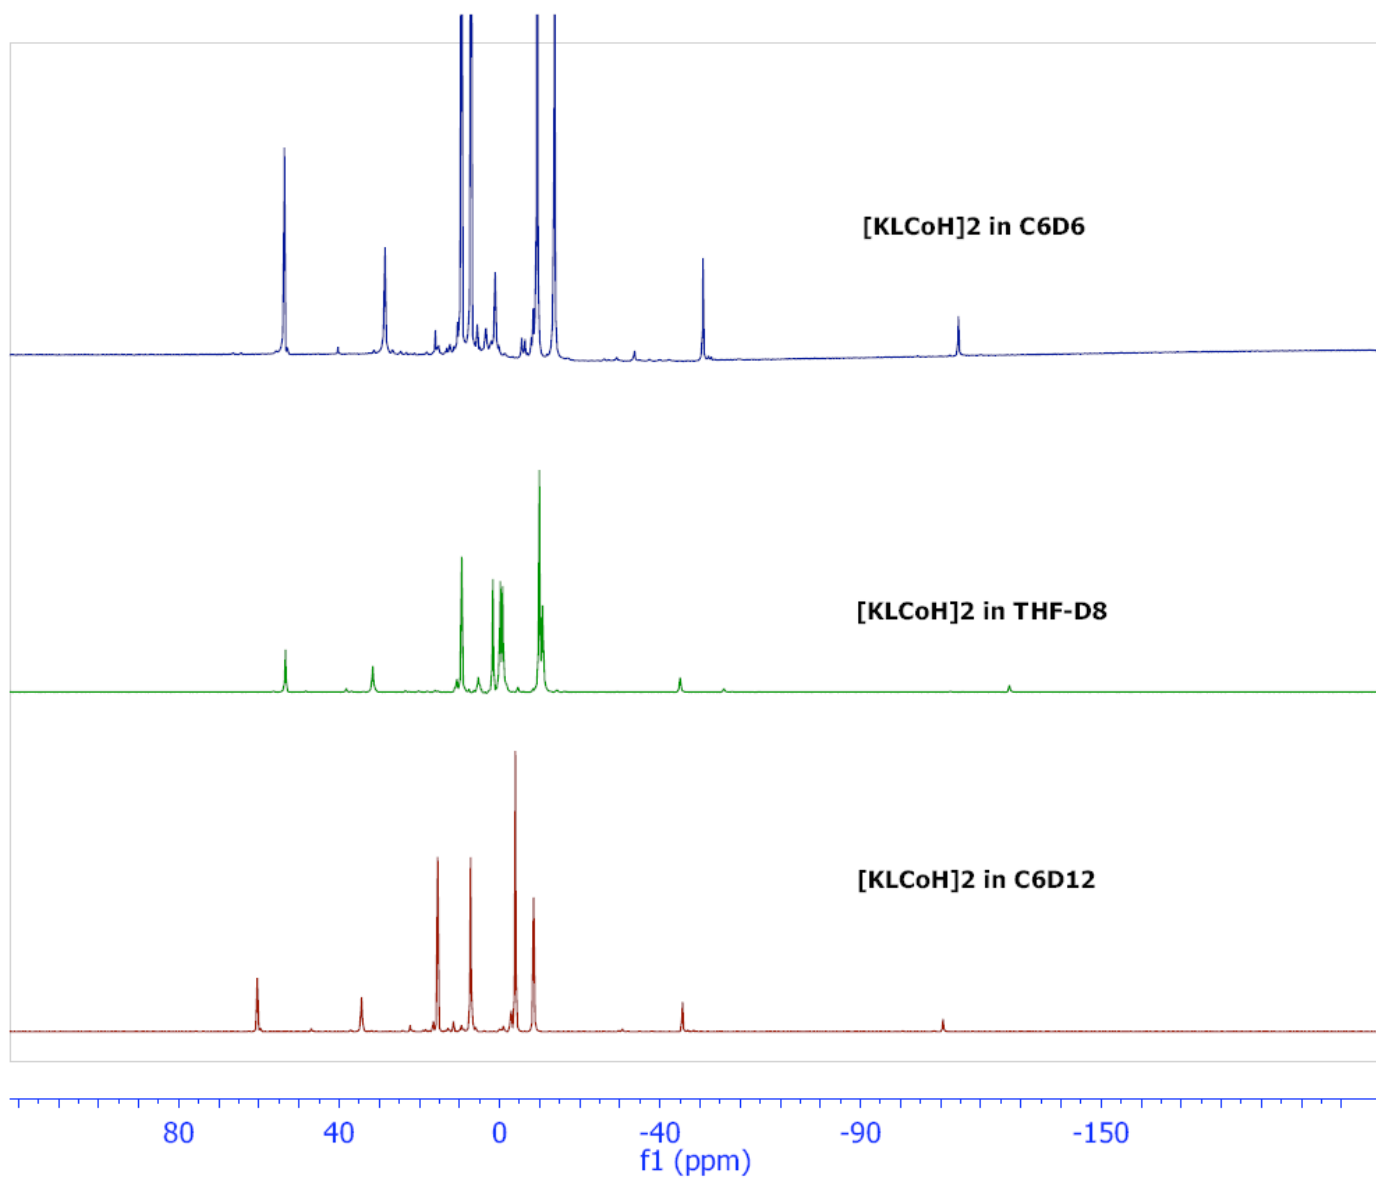

**Figure S-5.**  $^1\text{H}$  NMR spectra of  $[\text{KCoH}]_2$  (2) in  $\text{C}_6\text{D}_6$ ,  $\text{THF-}d_8$ , and  $\text{C}_6\text{D}_{12}$ .

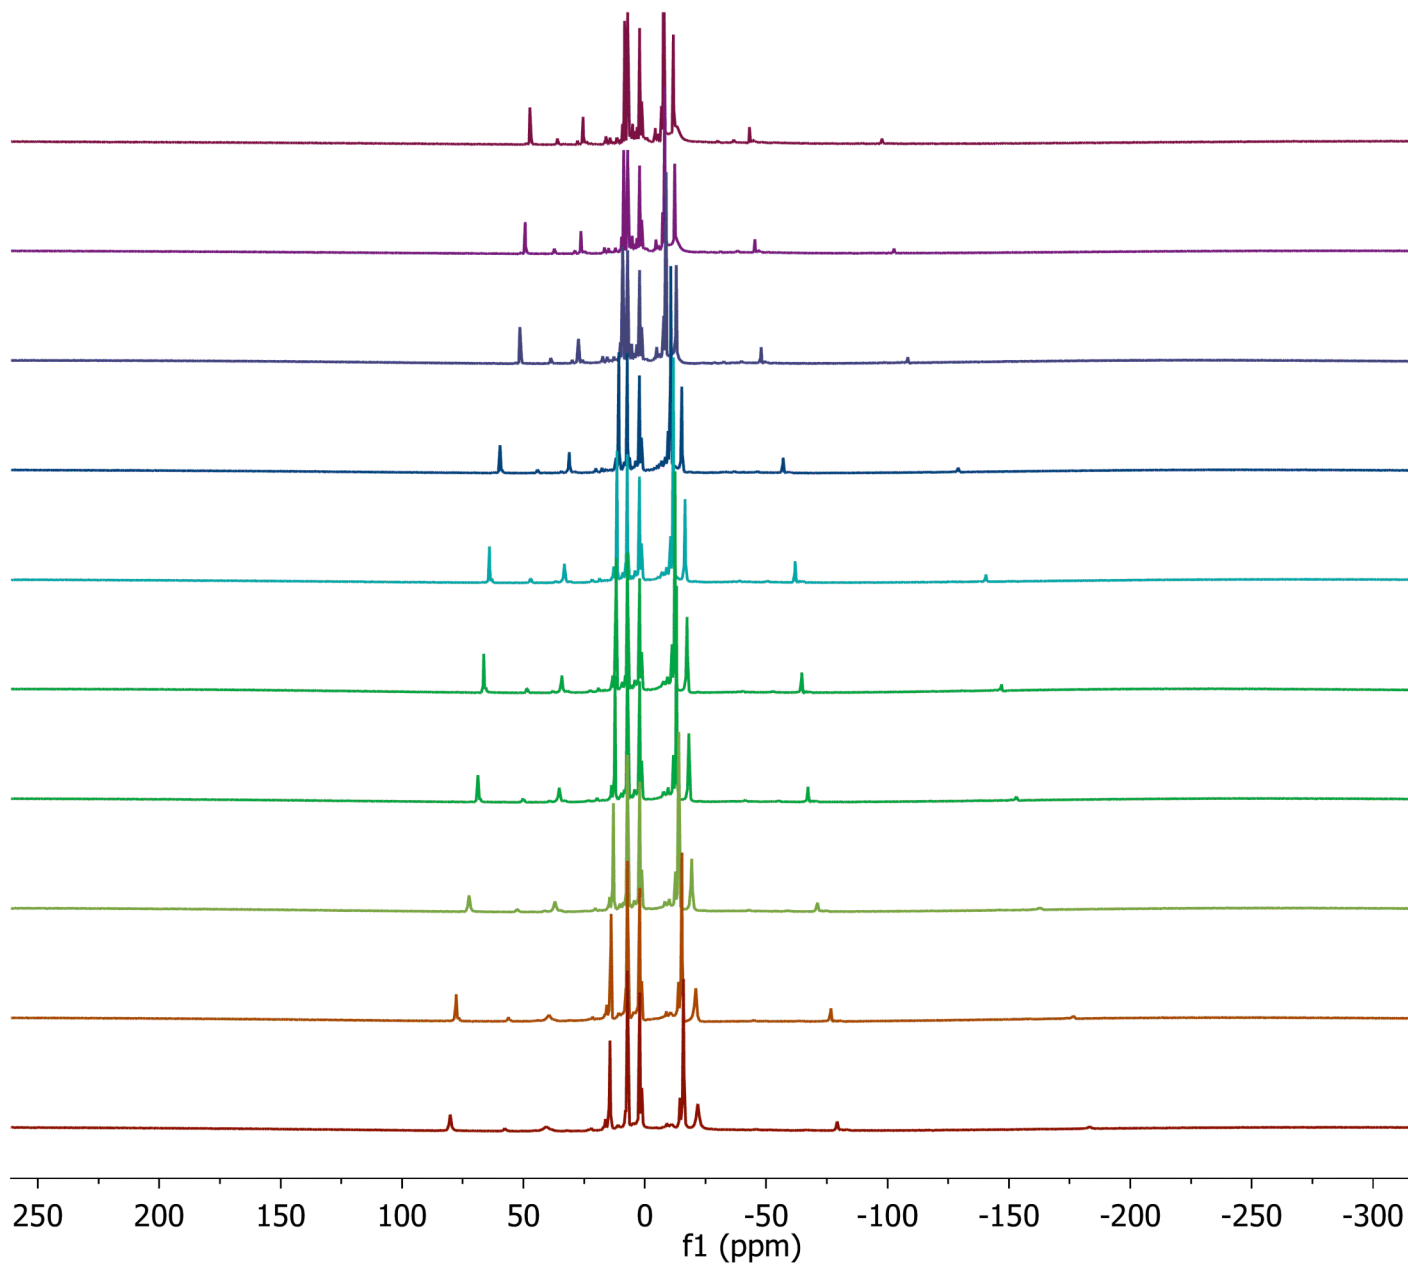

**Figure S-6.** Variable-temperature  $^1\text{H}$  NMR spectra of a solution of **2** in toluene- $d_8$ . The only major change is greater broadening and shifting at low temperature because of the higher magnetism (as expected from the Curie Law).

The FTIR spectra of **2** and **2-D** were identical, and showed no obvious Co-H stretching band.

KBr: 2953 (s), 2930 (m), 1520 (w), 1504 (m), 1452 (m), 1421 (s), 1378 (s), 1375 (s), 1352 (s), 1313 (s), 1208 (m), 1150 (w), 1092 (s), 789 (m), 745 (s)  $\text{cm}^{-1}$ .

**Figure S-7.** IR spectrum of **2**.

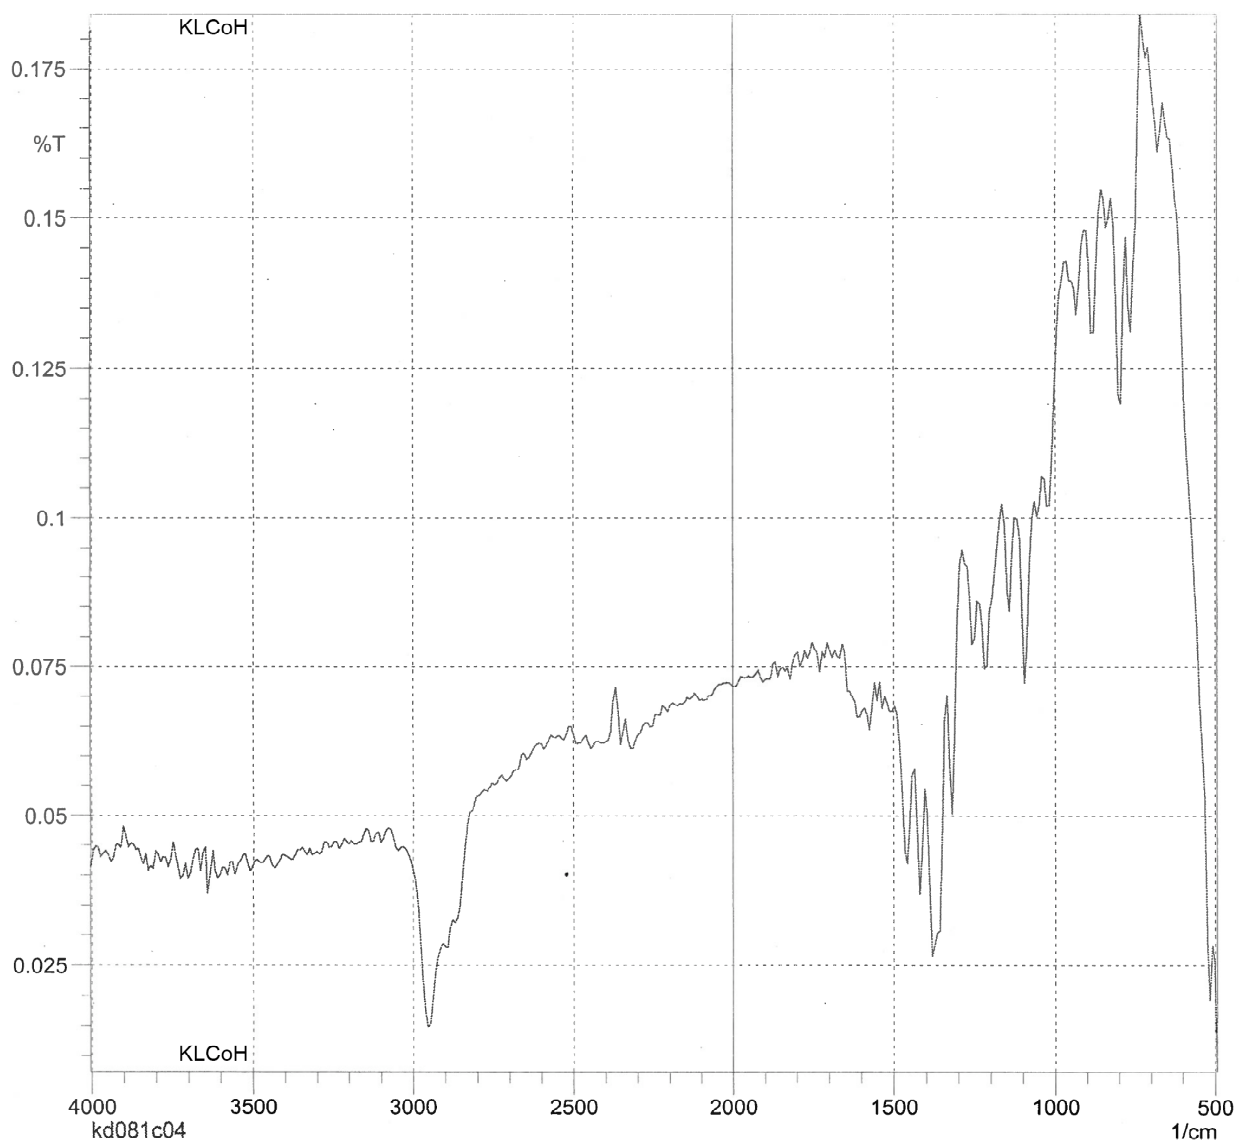

**Figure S-8.** IR spectrum of **2-D**.

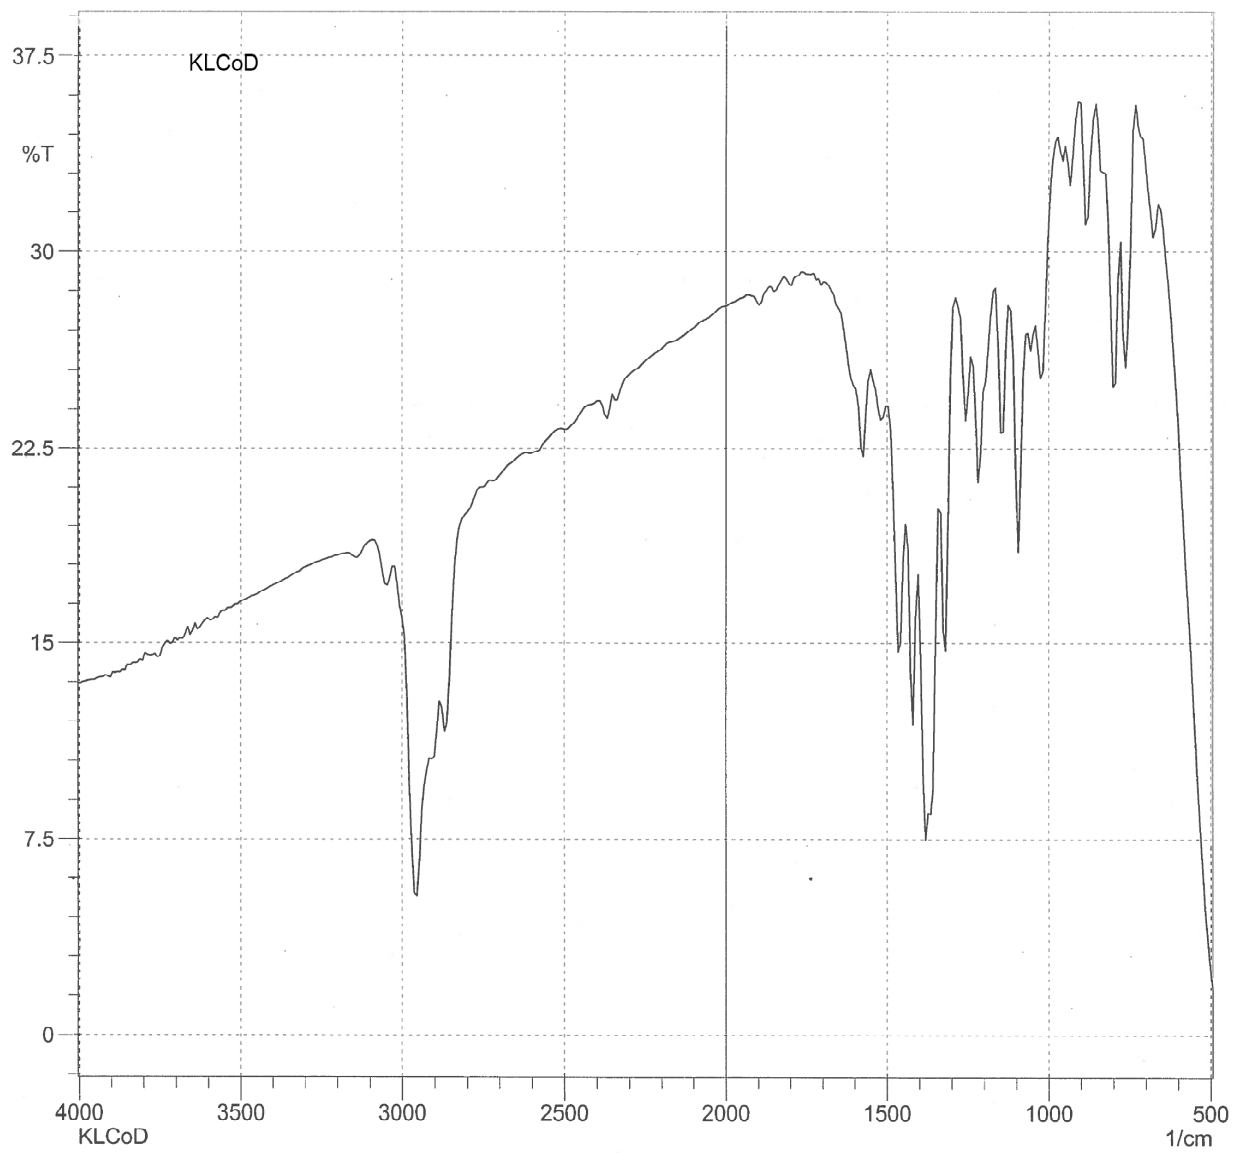

**Reaction of 1 with cyclohexene to give LCoCy.** Cyclohexene (16.5  $\mu\text{L}$ , 161  $\mu\text{mol}$ ) was added via a syringe to a solution of **1** (91 mg, 83  $\mu\text{mol}$ ) in  $\text{Et}_2\text{O}$  (15 mL). Over the course of 1 h, the brown solution became yellow in color. The volatiles were removed in vacuum. The yellow solid was extracted with diethyl ether (12 mL), reduced to 8 mL and cooled at  $-35\text{ }^\circ\text{C}$  to give yellow crystals (71 mg, 68%). The  $^1\text{H}$  NMR spectrum was identical to a that of  $\text{L}^{\text{tBu}}\text{CoCy}$ , as prepared below.

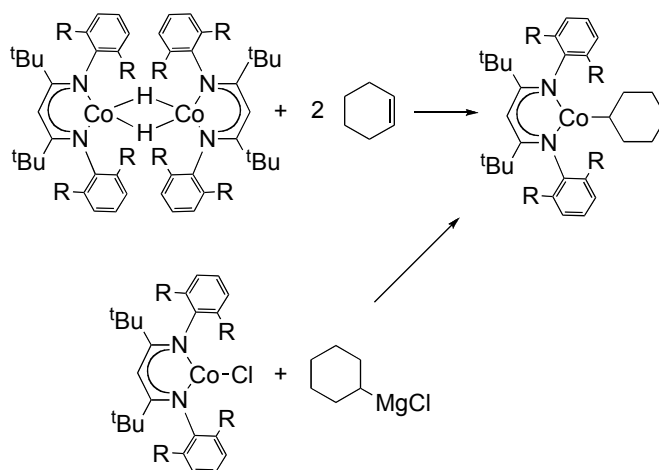

**Scheme S-1.** Two routes to LCoCy.

**Independent preparation of LCoCy.** To a stirred red brown slurry of  $\text{LCoCl}$  (93 mg, 0.16 mmol) in  $\text{Et}_2\text{O}$  (15 mL) was added cyclohexylmagnesium chloride (0.08 mL, 2.0 M in  $\text{Et}_2\text{O}$ , 0.16 mmol), giving an immediate color change to yellow with formation of a white precipitate. The mixture was stirred for 2 h, filtered through Celite, concentrated to 8 mL and cooled at  $-35\text{ }^\circ\text{C}$  to give yellow crystals (91.4 mg, 91%).  $^1\text{H}$  NMR (500 MHz,  $\text{C}_6\text{D}_6$ ):  $\delta$  132.7 (2H, Cy- $\gamma$ - $\text{CH}_2$ ), 113.1 (1H, backbone C-H), 68.2 (4H, *m*-H or  $\text{CH}(\text{CH}_3)_2$ ), 27.9 (18H,  $\text{C}(\text{CH}_3)_3$ ), -2.4 (12H,  $\text{CH}(\text{CH}_3)_2$ ), -28.3 (2H, *p*-H), -52.9 (4H, *m*-H or  $\text{CH}(\text{CH}_3)_2$ ), -125.3 (12H,  $\text{CH}(\text{CH}_3)_2$ ) ppm.  $\mu_{\text{eff}}$  (Evans,  $\text{C}_6\text{D}_6$ , 295 K) = 4.8(2)  $\mu_{\text{B}}$ . Anal. Calcd. for  $\text{C}_{41}\text{H}_{58}\text{N}_2\text{Co}$ : C 77.20, H 9.16, N 4.39. Found C 76.02, H 9.23, N 4.27. UV-vis ( $\text{Et}_2\text{O}$ ): 886 ( $\epsilon = 5400\text{ M}^{-1}\text{cm}^{-1}$ ), 486 ( $\epsilon = 12260\text{ M}^{-1}\text{cm}^{-1}$ ), 358 ( $\epsilon = 21600$

$\text{M}^{-1}\text{cm}^{-1}$  nm. IR (KBr): 2952 (s), 1519 (w), 1443 (m), 1401 (s), 1382 (s), 1375 (s), 1354 (s), 1311 (s), 1201 (m), 1153(w), 1094 (s), 793 (m), 753 (s)  $\text{cm}^{-1}$ .

**Activation of  $\text{N}_2$  by **1**.** In an argon filled glove box, a J. Young resealable NMR tube was charged with **1** (9.5 mg, 8.7  $\mu\text{mol}$ ) and  $\text{C}_6\text{D}_6$  (0.4 mL). An internal reference consisting of a capillary containing a solution of  $\text{L}^{\text{tBu}}\text{FeCl}$  (22.5 mM) in  $\text{C}_6\text{D}_6$  was added. The sample was degassed, taken into a  $\text{N}_2$ -filled box and briefly opened. The tube was then shaken on a vortex mixer.  $^1\text{H}$  NMR spectra were recorded after 1 h, showing the formation of a product with an  $^1\text{H}$  NMR spectrum identical to  $\text{LCoNNCoL}$  with a yield of 89%. (The unknown impurities present in **1** did not change, indicating that they do not react with dinitrogen. See Figure S-9.)  $^1\text{H}$  NMR (500 MHz,  $\text{C}_6\text{D}_6$ , 295 K):  $\delta$  92.0 (2H, backbone C-H), 40.8 (36H,  $\text{C}(\text{CH}_3)_3$ ), 8.2 (8H, *m*-H or  $\text{CH}(\text{CH}_3)_2$ ), -12.4 (24H,  $\text{CH}(\text{CH}_3)_2$ ), -45.3 (8H,  $\text{CH}(\text{CH}_3)_2$  or *m*-H), -67.8 (24H,  $\text{CH}(\text{CH}_3)_2$ ), -73.6 (4H, *p*-H) ppm.

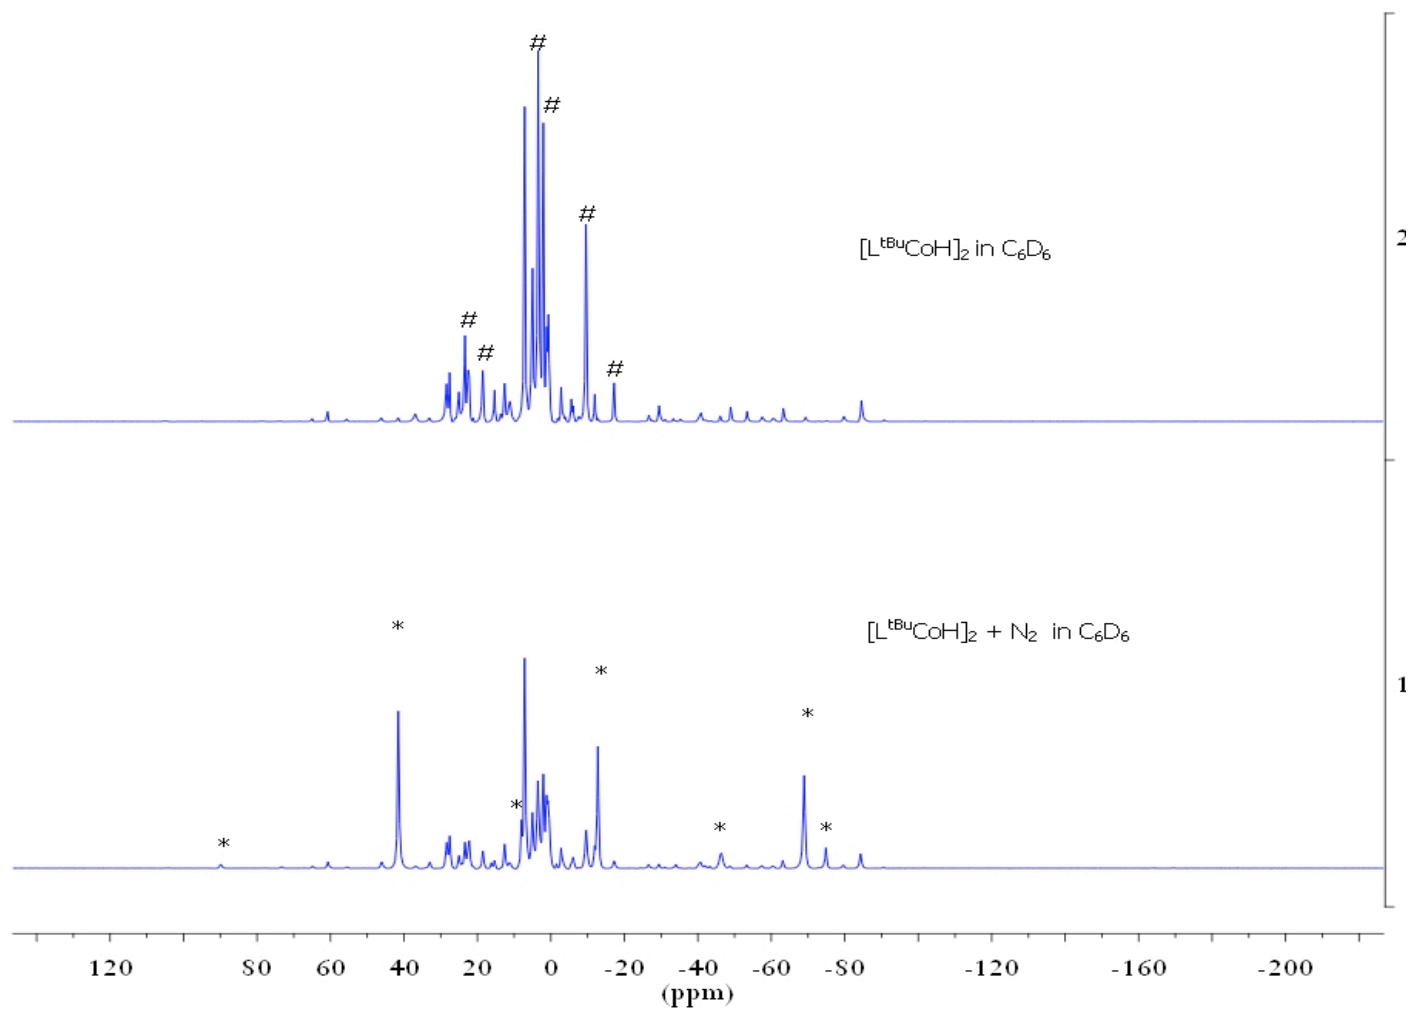

**Figure S-9.**  $^1\text{H}$  NMR spectra of the reaction of 1 with dinitrogen ( $\text{C}_6\text{D}_6$ ). Peaks labeled # are from complex 1, peaks labeled \* are from  $\text{LCoNNCoL}$ .

**Crossover Experiment with 1 and 1-D.** A 25 mL Schlenk tube was charged with **1** (256 mg) and **1-D** (256 mg) under argon, evacuated, and brought into an N<sub>2</sub>-filled glove box. Toluene (35 mL) was added to the flask under nitrogen, and the mixture was stirred for 2 h. A septum was attached to the branch of the tube. 2.5 mL gas was removed by syringe and injected to a NMR tube containing C<sub>6</sub>D<sub>6</sub>. H<sub>2</sub> and HD were detected by <sup>1</sup>H NMR (Figure S-10).

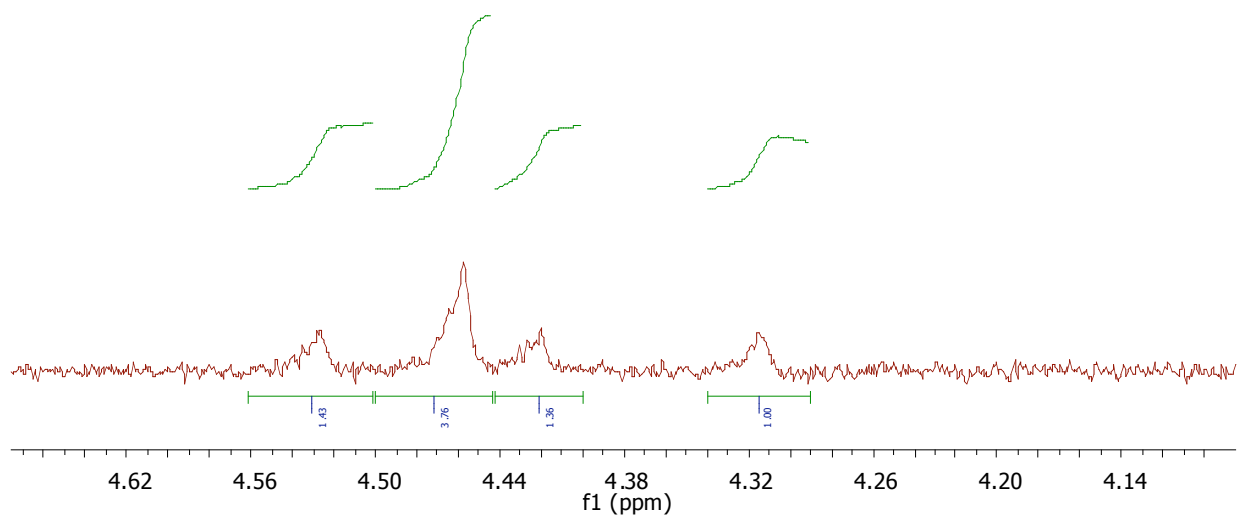

**Figure S-10.**



**Activation of N<sub>2</sub> by 2.** In an argon-filled glove box, a resealable NMR tube was charged with **2** (4.1 mg, 3.5 μmol) and C<sub>6</sub>D<sub>6</sub> (0.3 mL). An internal reference consisting of a capillary containing a solution of LFeCl (22.5 mM) in C<sub>6</sub>D<sub>6</sub> was added. After the sample was degassed, the tube was taken into an N<sub>2</sub>-filled glove box and opened to let N<sub>2</sub> in. The tube was then shaken on a vortex mixer. <sup>1</sup>H NMR spectra were recorded every 20 to 40 minutes (Figure S-11). After about 7 h, <sup>1</sup>H NMR spectra showed full conversion to K<sub>2</sub>LCoNNCoL with a yield of 91%. <sup>1</sup>H NMR (500 MHz, C<sub>6</sub>D<sub>6</sub>, 295 K): δ 24.9 (8H, *m*-H or CH(CH<sub>3</sub>)<sub>2</sub>), 18.6 (8H, CH(CH<sub>3</sub>)<sub>2</sub> or *m*-H), 10.6 (24H, CH(CH<sub>3</sub>)<sub>2</sub>), 3.3 (24H, CH(CH<sub>3</sub>)<sub>2</sub>), -5.4 (36H, C(CH<sub>3</sub>)<sub>3</sub>), -25.1 (4H, *p*-H), -72.4 (2H, backbone C-H) ppm.

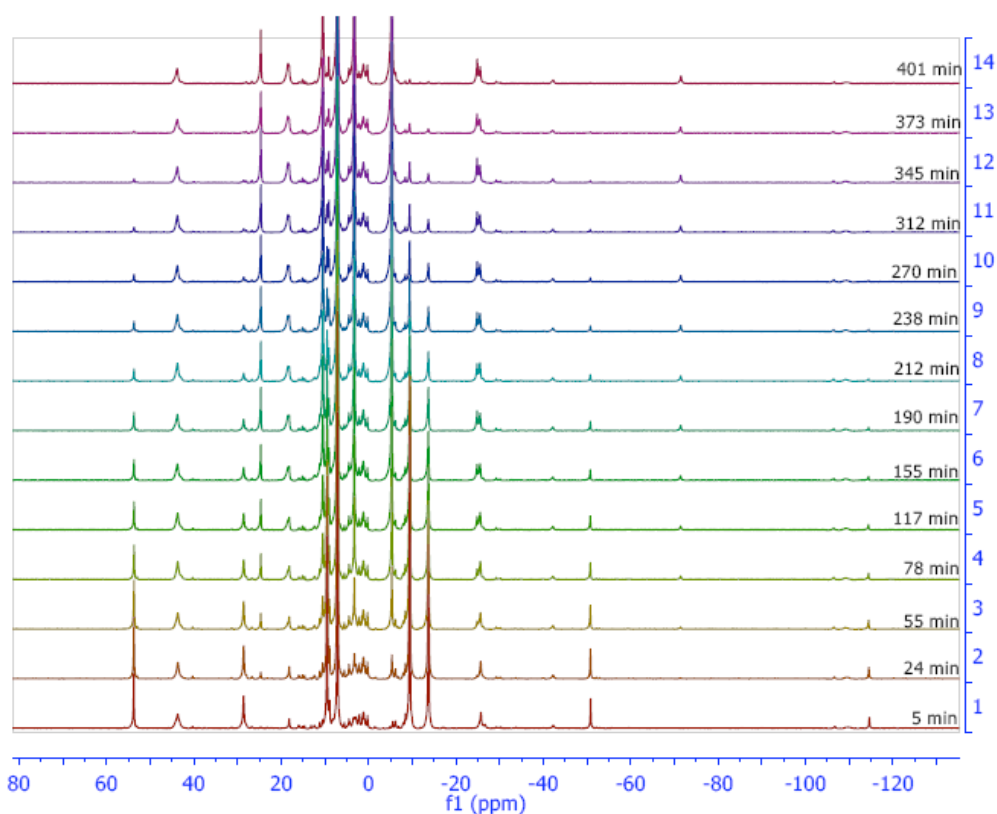

**Figure S-11.** <sup>1</sup>H NMR spectra of the reaction of **2** with N<sub>2</sub> (C<sub>6</sub>D<sub>6</sub>). LFeCl was used as an internal integration standard.

**Crossover Experiment with 2 and 2-D.** A 25 mL Schlenk tube was charged with **1** (202 mg) and **1-D** (202 mg) under argon, evacuated, and brought into an N<sub>2</sub>-filled glove box. Toluene (30 mL) was added to the flask under nitrogen, and the mixture was stirred for 24 h. A septum was attached to the branch of the tube. 2.5 mL of the headspace was removed by syringe and injected to a NMR tube containing C<sub>6</sub>D<sub>6</sub>. Only H<sub>2</sub> was detected by <sup>1</sup>H NMR, with no HD detectable (Figure S-12).

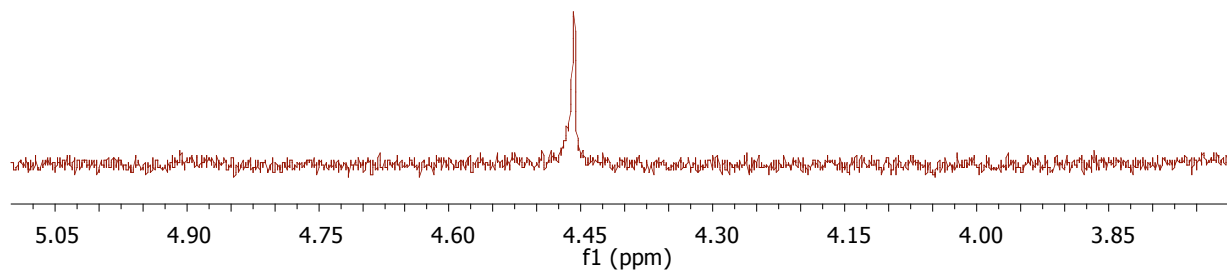

**Figure S-12.**

## GC quantification of H<sub>2</sub>.

**Calibration Plot:** A 25 mL round bottom flask was charged with toluene (10 mL) and a magnetic stir bar. A vacuum adaptor was attached with a septum on top. 8.0 mL of gas from the headspace was removed using a syringe, and 8.0 mL of CH<sub>4</sub> was injected into the closed system as an internal standard. A sample of H<sub>2</sub> was injected to the flask (0.20 mL, 0.60 mL, 1.0 mL, 1.4 mL, 1.8 mL, at 1051 mbar). An aliquot of the headspace was then injected into a GC-17A gas chromatograph (Shimadzu) with a 5 Å molecular sieve column (30 m × 0.25 mm, oven temperature 26 °C, carrier gas N<sub>2</sub>, 600 kPa). A calibration plot was obtained by plotting the ratio of GC peak integrations H<sub>2</sub>/CH<sub>4</sub> versus the amount of hydrogen added to the flask.

**Table S-2.** GC calibration plot data.

| $V_{\text{H}_2}$ / mL | Integration of H <sub>2</sub> peak | Integration of CH <sub>4</sub> peak | Integration Ratio of<br>H <sub>2</sub> :CH <sub>4</sub> |
|-----------------------|------------------------------------|-------------------------------------|---------------------------------------------------------|
| 0.2                   | 8.011                              | 91.899                              | 0.087                                                   |
| 0.6                   | 21.432                             | 78.543                              | 0.273                                                   |
| 1                     | 31.078                             | 68.902                              | 0.451                                                   |
| 1.4                   | 39.831                             | 60.121                              | 0.663                                                   |
| 1.8                   | 45.232                             | 54.732                              | 0.826                                                   |

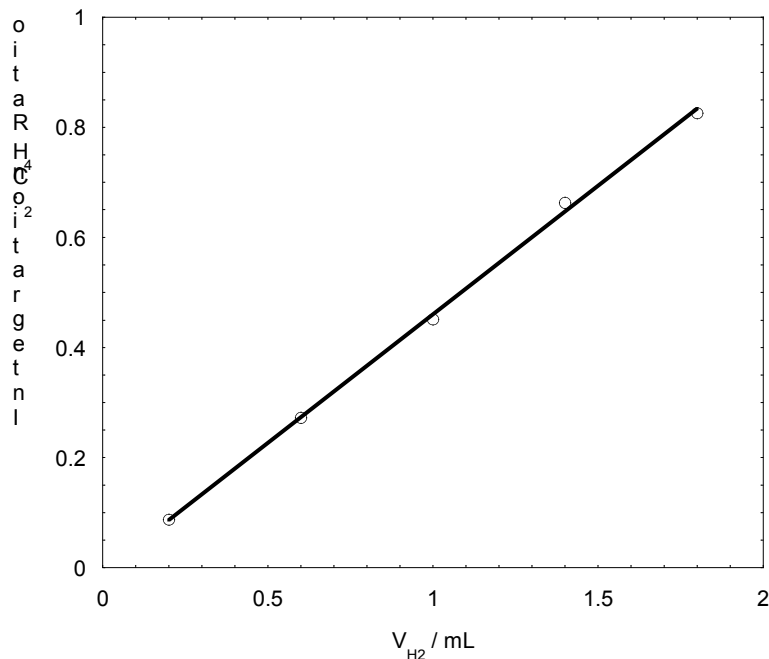

**Figure S-13.** GC calibration plot.

**Detection of evolved H<sub>2</sub> from 1 + N<sub>2</sub>.** In an argon-filled box, the same round bottom flask used for the H<sub>2</sub> calibration was charged with **1** (43 mg, 38 μmol) and a stir bar. The flask was then closed at the vacuum adaptor, taken into a N<sub>2</sub> box and 8 mL of gas was taken out. 10 mL of toluene was injected and the mixture was stirred at room temperature for 2 h. The whole set-up was then taken out of the glove box, 8 mL CH<sub>4</sub> was added and the headspace was subjected to GC analysis as described above. The integration ratio was compared to the calibration plot to quantify the amount of free hydrogen released from the reaction. The solution was analyzed by <sup>1</sup>H NMR spectroscopy to determine the yield of **3**. The above reaction was repeated and the results were shown in Table S-2.

**Table S-3.** Hydrogen detection data. **1** = LCo( $\mu$ -H)<sub>2</sub>CoL, **3** = LCoNNCoL.

| <b>1</b> / $\mu$ mol | <b>3</b> / $\mu$ mol | H <sub>2</sub> detected / $\mu$ mol | yields   |                |
|----------------------|----------------------|-------------------------------------|----------|----------------|
|                      |                      |                                     | <b>3</b> | H <sub>2</sub> |
| 38.3                 | 24.2                 | 21.8                                | 89%      | 80%            |
| 24.5                 | 21.8                 | 19.8                                | 90%      | 81%            |
| 25.2                 | 21.9                 | 19.9                                | 87%      | 78%            |

**Detection of evolved H<sub>2</sub> from **2** + N<sub>2</sub>.** In an argon-filled box, the same round bottom flask used for the H<sub>2</sub> calibration was charged with **2** (32 mg, 27  $\mu$ mol) and a stir bar. The flask was then closed at the vacuum adaptor, taken into a N<sub>2</sub> box and 8 mL gas was taken out. 10 mL of toluene was injected and the mixture was stirred at room temperature for 10 h until the solution color turned to dark purple. The whole set-up was then taken out of the glove box, 8 mL CH<sub>4</sub> was added and the headspace was subjected to GC analysis as described above. The integration ratio was compared to the calibration plot to quantify the amount of free hydrogen released from the reaction. The solution was analyzed by <sup>1</sup>H NMR spectroscopy to determine the yield of **4**. The reaction was repeated and the results are shown in Table S-3.

**Table S-4.** Hydrogen detection data. **2** = [KLCOH]<sub>2</sub>, **4** = K<sub>2</sub>LCoNNCoL.

| 2 / μmol | 4 / μmol | H <sub>2</sub> detected / μmol | yield |                |
|----------|----------|--------------------------------|-------|----------------|
|          |          |                                | 4     | H <sub>2</sub> |
| 26.6     | 24.2     | 21.8                           | 91%   | 82%            |
| 24.5     | 21.8     | 20.8                           | 89%   | 85%            |
| 24.7     | 22.5     | 20                             | 91%   | 81%            |

## References

<sup>1</sup> (a) Baker, M. V.; Field, L. D.; Hambley, T. W. *Inorg. Chem.* **1988**, *27*, 2872. (b) Schubert, E. *M. J. Chem. Ed.* **1992**, *69*, 62.

<sup>2</sup> Smith, J. M.; Lachicotte, R. J.; Holland, P. L. *Chem. Commun.* **2001**, 1542.

<sup>3</sup> (a) Holland, P. L.; Cundari, T. R.; Perez, L. L.; Eckert, N. A.; Lachicotte, R. J. *J. Am. Chem. Soc.* **2002**, *124*, 14416-14424. (b) An improved procedure is in: Ding, K.; Pierpont, A. W.; Brennessel, W. W.; Lukat-Rodgers, G.; Rodgers, K. R.; Cundari, T. R.; Bill, E.; Holland, P. L., *J. Am. Chem. Soc.*, in press.

<sup>4</sup> Fryzuk, M.D.; Lloyd, B.R.; Clentsmith, G. K. B.; Rettig, S. J. *J. Am. Chem. Soc.* **1994**, *116*, 3804.

<sup>5</sup> Pasto, D.J.; Johnson, C.R. *Laboratory Text for Organic Chemistry*; Prentice-Hall: Englewood Cliffs, 1979; pp 101-102

REFERENCE NUMBER: holkd15

CRYSTAL STRUCTURE REPORT

$C_{77}H_{116}Co_2N_4$

or

$[LCo(\mu-H)]_2 \cdot \text{toluene}$

Report prepared for:

K. Ding, Prof. P. Holland

June 23, 2008

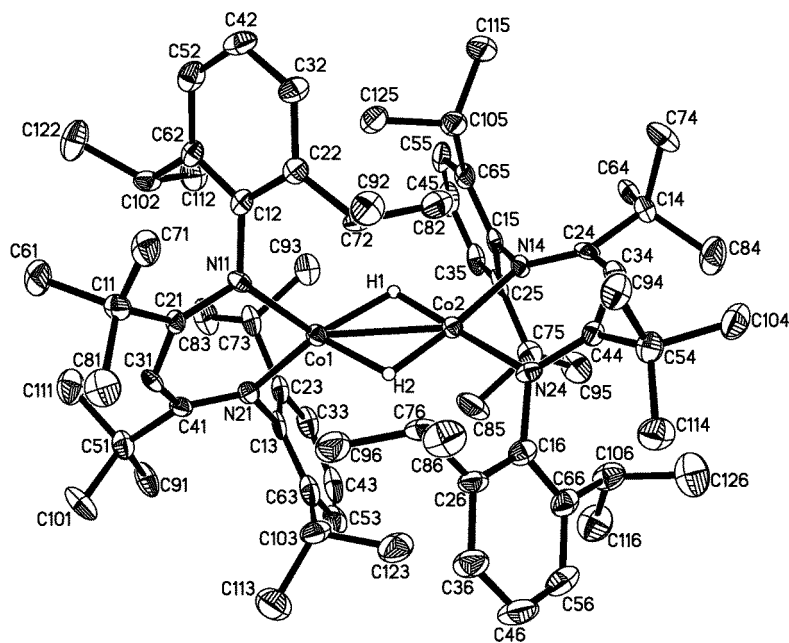

William W. Brennessel

X-ray Crystallographic Facility

Department of Chemistry, University of Rochester

120 Trustee Road

Rochester, NY 14627

### Data collection

A crystal (0.36 x 0.28 x 0.10 mm<sup>3</sup>) was placed onto the tip of a 0.1 mm diameter glass capillary tube or fiber and mounted on a Bruker SMART APEX II CCD Platform diffractometer for a data collection at 100.0(1) K.<sup>1</sup> A preliminary set of cell constants and an orientation matrix were calculated from reflections harvested from three orthogonal wedges of reciprocal space. The full data collection was carried out using MoK $\alpha$  radiation (graphite monochromator) with a frame time of 120 seconds and a detector distance of 5.02 cm. A randomly oriented region of reciprocal space was surveyed: three major sections of frames were collected with 0.75° steps in  $\omega$  at three different  $\phi$  settings and a detector position of -33° in  $2\theta$ . The intensity data were corrected for absorption.<sup>2</sup> Final cell constants were calculated from the xyz centroids of 4096 strong reflections from the actual data collection after integration.<sup>3</sup> See Table 1 for additional crystal and refinement information.

### Structure solution and refinement

The structure was solved using SIR97<sup>4</sup> and refined using SHELXL-97.<sup>5</sup> The space group *P*-1 was determined based on the lack of systematic absences and intensity statistics. A direct-methods solution was calculated which provided most non-hydrogen atoms from the E-map. Full-matrix least squares / difference Fourier cycles were performed which located the remaining non-hydrogen atoms. All non-hydrogen atoms were refined with anisotropic displacement parameters. Bridging hydride atoms were assigned from the difference Fourier map; their positions were refined independently of all heavier atoms and their isotropic displacement parameters were refined relative to those of the cobalt atoms ( $U_{\text{iso}}[\text{H}] = 2.0U_{\text{eq}}[\text{Co}]$ ). All other hydrogen atoms were placed in ideal positions and refined as riding atoms with relative isotropic displacement parameters.

The refinement stalled at  $R1 = 0.103$ , at which point twin modeling was required. After the non-merohedral twin law,  $[-0.665\ 0\ 0.335 / 0.274\ -1\ 0.274 / 1.665\ 0\ 0.665]$ , a 180° rotation about direct lattice  $[1\ 0\ 1]$ , was determined,<sup>6</sup> the data were re-integrated,<sup>3</sup> and a new absorption correction was applied.<sup>7</sup> There were 84812 unique reflections associated solely with the first component, 84580 reflections associated solely with the second component, and 16736 overlapping reflections. The mass ratio of the two components refined to 63:37. The final full matrix least squares refinement converged to  $R1 = 0.0732$  ( $F^2$ ,  $I > 2\sigma(I)$ ) and  $wR2 = 0.1699$  ( $F^2$ , all data).

### Structure description

The structure is the one suggested. There are three unique di-cobalt species in the asymmetric unit with all atoms in general positions. Additionally there are three co-crystallized toluene solvent molecules in the asymmetric unit: two are in general positions and the third is divided between two crystallographic inversion centers. There are a variety of disorders among the alkyl groups and solvent molecules, all modeled over two positions (ratio in parentheses): <sup>t</sup>Bu group C211 (81:19), <sup>t</sup>Bu group C451 (52:48), <sup>i</sup>Pr group C473 (79:21), <sup>i</sup>Pr group C503 (78:22), and four toluene solvent molecules (50:50 [inversion], 50:50 [inversion], 72:28, 61:39). Similar ratios may suggest related disorders.



Intramolecular angles between N-Co-N planes of each dinuclear molecule are 84.87(15), 89.82(16), and 89.21(16) degrees, respectively, for Co1/Co2, Co3/Co4, and Co5/Co6. The angles between N-Co-N and H-Co-H planes are 85.6(18) degrees for N11-Co1-N21 and H1-Co1-H2, and 9.3(38) degrees for N14-Co2-N24 and H1-Co2-H2. Similarly defined angles are 75.0(18), 14.5(37), 68.7(22), and 20.9(34) degrees for the remaining molecules.

Unless noted otherwise all structural diagrams containing thermal displacement ellipsoids are drawn at the 50 % probability level.

Data collection, structure solution, and structure refinement were conducted at the X-ray Crystallographic Facility, B51 Hutchison Hall, Department of Chemistry, University of Rochester. All publications arising from this report MUST either 1) include William W. Brennessel as a coauthor or 2) acknowledge William W. Brennessel and the X-ray Crystallographic Facility of the Department of Chemistry at the University of Rochester.

---

<sup>1</sup> *APEX2*, version 2.2-0; Bruker AXS: Madison, WI, 2007.

<sup>2</sup> Sheldrick, G. M. *SADABS*, version 2007/4; University of Göttingen: Göttingen, Germany, 2007.

<sup>3</sup> *SAINTE*, version 7.46A; Bruker AXS: Madison, WI, 2007.

<sup>4</sup> Altomare, A.; Burla, M. C.; Camalli, M.; Cascarano, G. L.; Giacovazzo, C.; Guagliardi, A.; Moliterni, A. G. G.; Polidori, G.; Spagna, R. *SIR97: A new program for solving and refining crystal structures*; Istituto di Cristallografia, CNR: Bari, Italy, 1999.

<sup>5</sup> Sheldrick, G. M. *Acta. Cryst.* **2008**, *A64*, 112-122.

Some equations of interest:

$$R_{\text{int}} = \frac{\sum |F_o^2 - \langle F_o^2 \rangle|}{\sum |F_o^2|}$$

$$R1 = \frac{\sum ||F_o| - |F_c||}{\sum |F_o|}$$

$$wR2 = \frac{[\sum [w(F_o^2 - F_c^2)^2]]}{\sum [w(F_o^2)^2]}^{1/2}$$

where  $w = 1 / [\sigma^2(F_o^2) + (aP)^2 + bP]$  and

$$P = 1/3 \max(0, F_o^2) + 2/3 F_c^2$$

$$\text{GOF} = S = \frac{[\sum [w(F_o^2 - F_c^2)^2]]}{(m-n)}^{1/2}$$

where  $m$  = number of reflections and  $n$  = number of parameters

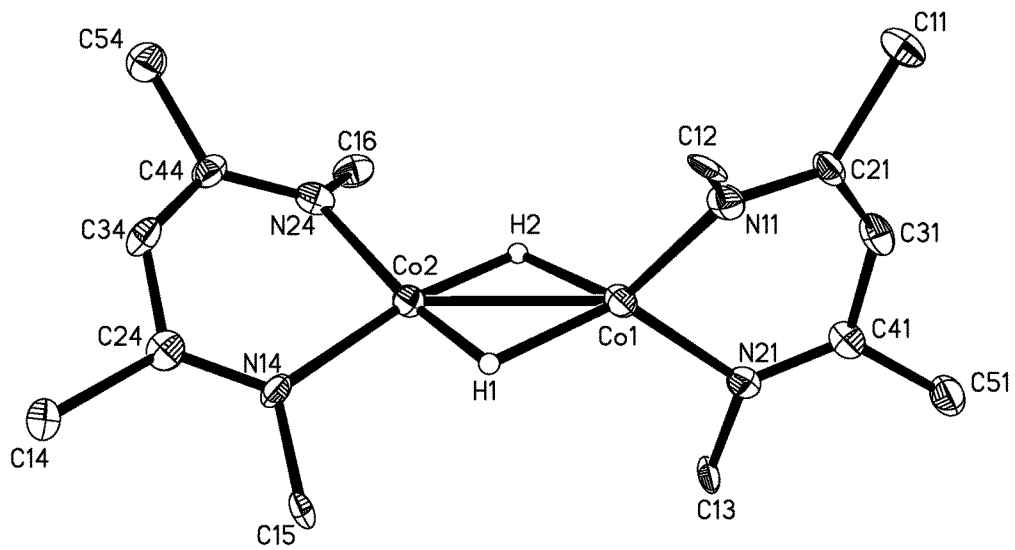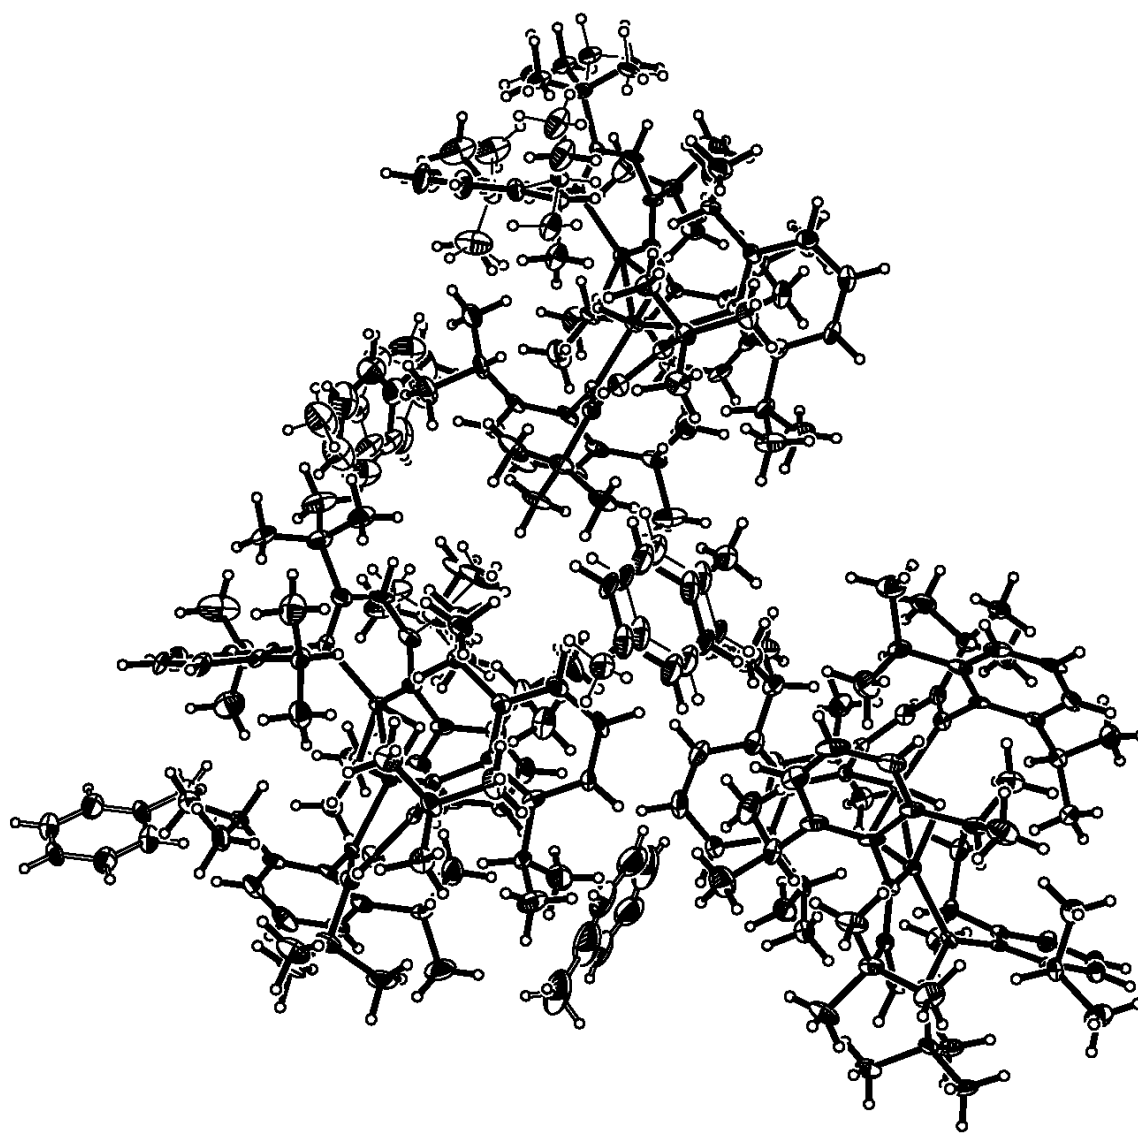

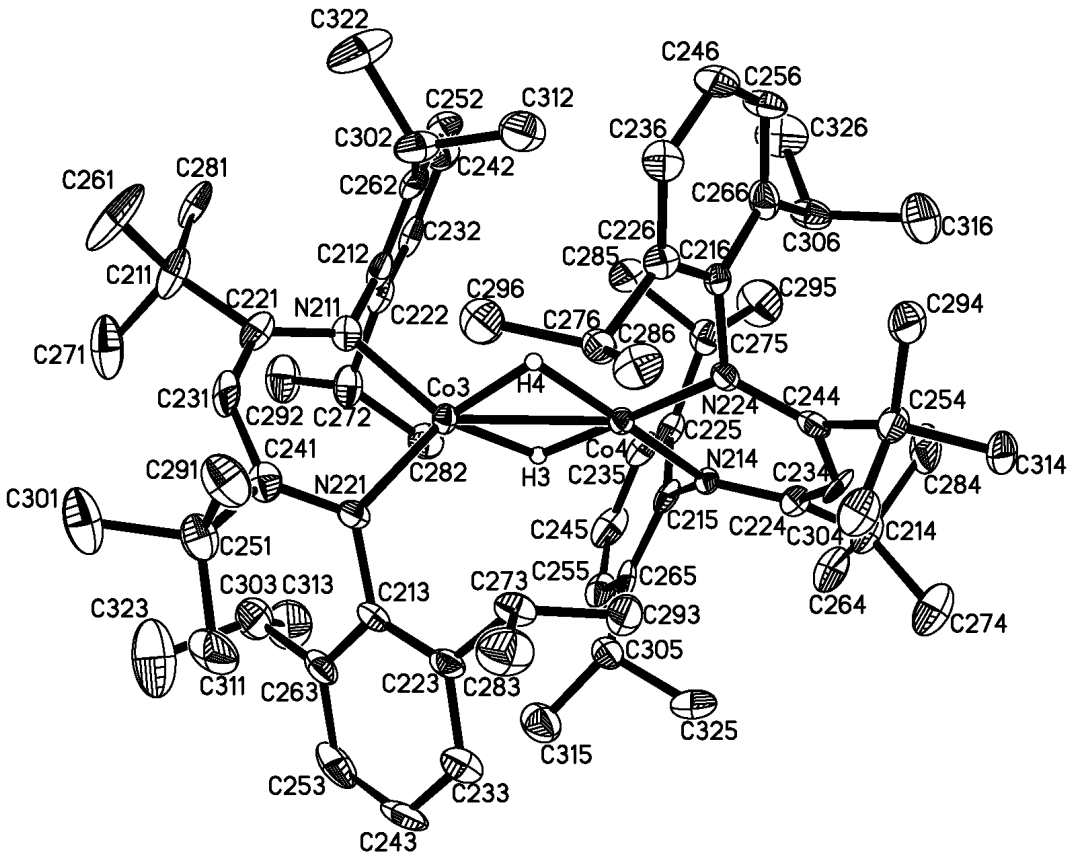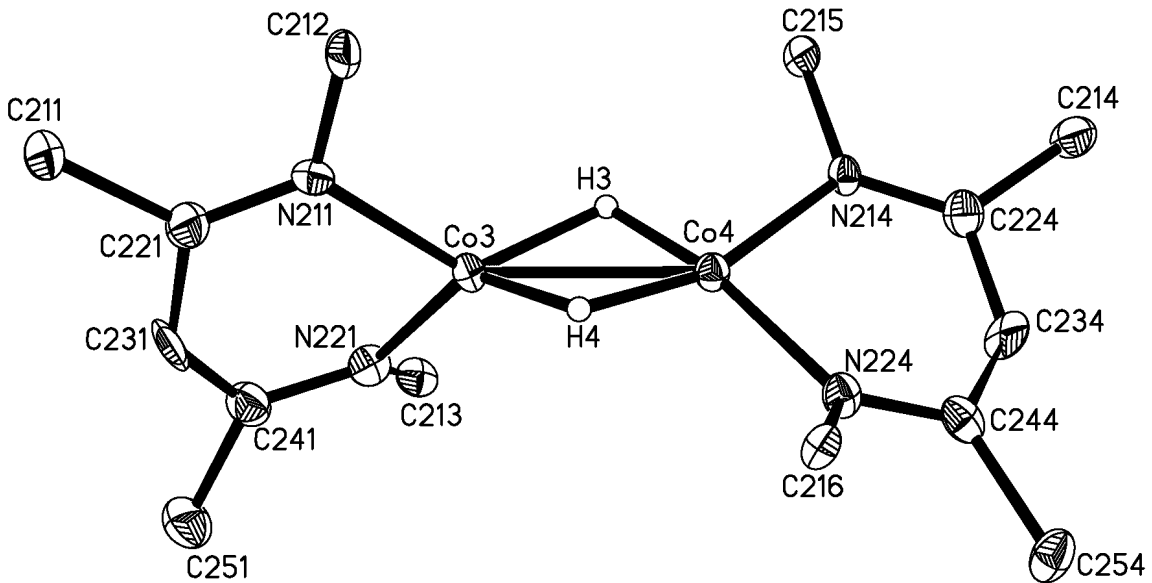

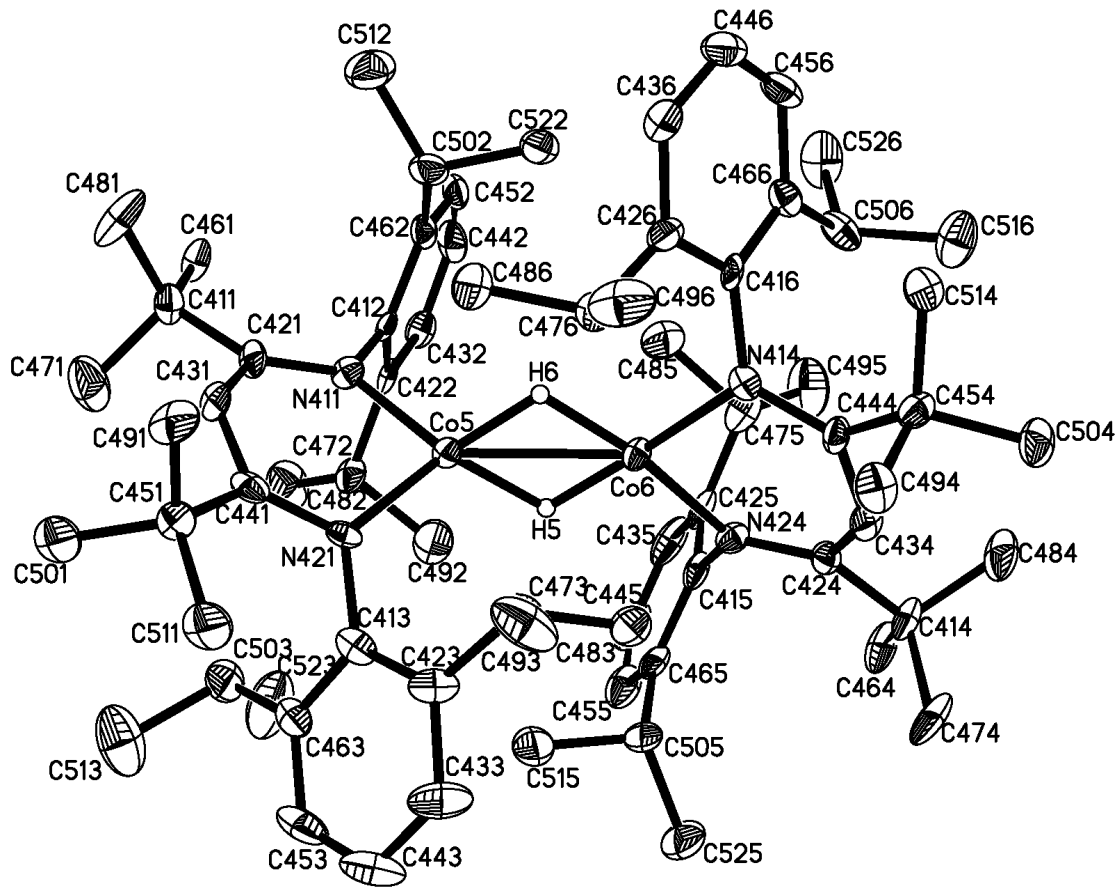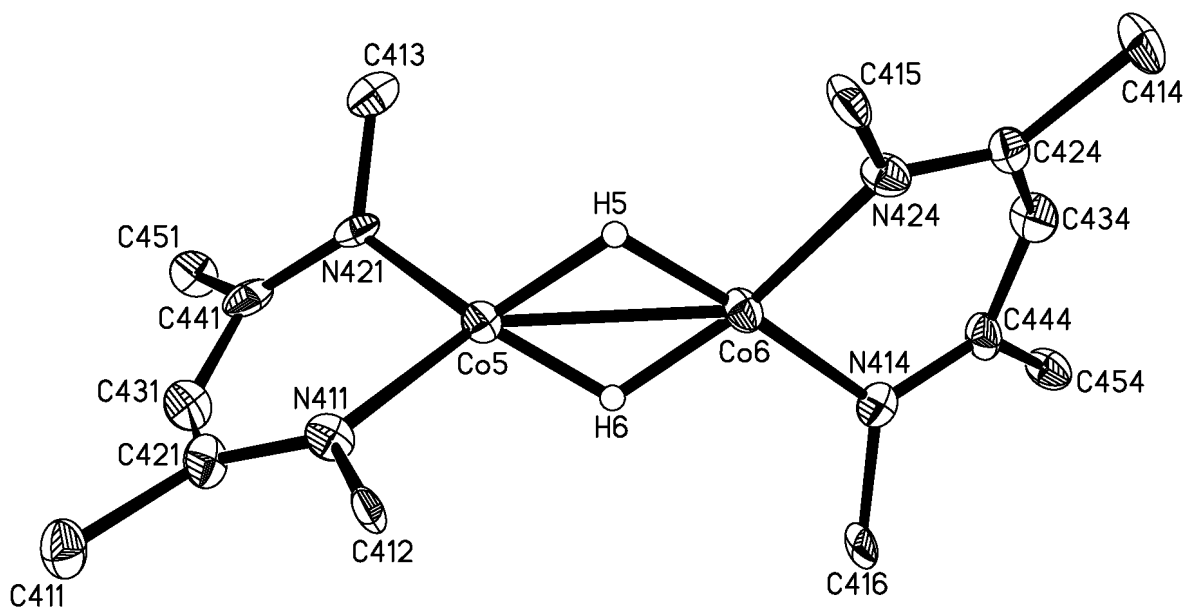

Table 1. Crystal data and structure refinement for holkd15.

|                                                    |                                                            |                            |
|----------------------------------------------------|------------------------------------------------------------|----------------------------|
| Identification code                                | holkd15                                                    |                            |
| Empirical formula                                  | C77 H116 Co2 N4                                            |                            |
| Formula weight                                     | 1215.60                                                    |                            |
| Temperature                                        | 100.0(1) K                                                 |                            |
| Wavelength                                         | 0.71073 Å                                                  |                            |
| Crystal system                                     | Triclinic                                                  |                            |
| Space group                                        | <i>P</i> -1                                                |                            |
| Unit cell dimensions                               | $a = 13.283(4)$ Å                                          | $\alpha = 80.537(5)^\circ$ |
|                                                    | $b = 24.629(8)$ Å                                          | $\beta = 83.396(4)^\circ$  |
|                                                    | $c = 32.790(10)$ Å                                         | $\gamma = 80.793(5)^\circ$ |
| Volume                                             | 10401(6) Å <sup>3</sup>                                    |                            |
| <i>Z</i>                                           | 6                                                          |                            |
| Density (calculated)                               | 1.164 Mg/m <sup>3</sup>                                    |                            |
| Absorption coefficient                             | 0.522 mm <sup>-1</sup>                                     |                            |
| <i>F</i> (000)                                     | 3960                                                       |                            |
| Crystal color, morphology                          | dark orange, block                                         |                            |
| Crystal size                                       | 0.36 x 0.28 x 0.10 mm <sup>3</sup>                         |                            |
| Theta range for data collection                    | 1.41 to 25.03°                                             |                            |
| Index ranges                                       | $-15 \leq h \leq 15, -28 \leq k \leq 29, 0 \leq l \leq 39$ |                            |
| Reflections collected                              | 36503                                                      |                            |
| Independent reflections                            | 36503 [ <i>R</i> (int) = 0.0000]                           |                            |
| Observed reflections                               | 18717                                                      |                            |
| Completeness to theta = 25.03°                     | 99.3%                                                      |                            |
| Absorption correction                              | Multi-scan                                                 |                            |
| Max. and min. transmission                         | 0.9496 and 0.8342                                          |                            |
| Refinement method                                  | Full-matrix least-squares on <i>F</i> <sup>2</sup>         |                            |
| Data / restraints / parameters                     | 36503 / 40 / 2356                                          |                            |
| Goodness-of-fit on <i>F</i> <sup>2</sup>           | 1.007                                                      |                            |
| Final <i>R</i> indices [ <i>I</i> >2σ( <i>I</i> )] | <i>R</i> 1 = 0.0732, <i>wR</i> 2 = 0.1358                  |                            |
| <i>R</i> indices (all data)                        | <i>R</i> 1 = 0.1656, <i>wR</i> 2 = 0.1699                  |                            |
| Largest diff. peak and hole                        | 0.881 and -0.671 e.Å <sup>-3</sup>                         |                            |

Table 2. Atomic coordinates ( $\times 10^4$ ) and equivalent isotropic displacement parameters ( $\text{\AA}^2 \times 10^3$ ) for holkd15.  $U_{\text{eq}}$  is defined as one third of the trace of the orthogonalized  $U_{ij}$  tensor.

|      | x       | y        | z       | $U_{\text{eq}}$ |
|------|---------|----------|---------|-----------------|
| Co1  | 4925(1) | 7984(1)  | 1577(1) | 16(1)           |
| Co2  | 3662(1) | 7391(1)  | 1941(1) | 15(1)           |
| N11  | 4765(3) | 8589(2)  | 1103(1) | 16(1)           |
| N21  | 6393(3) | 8014(2)  | 1632(1) | 17(1)           |
| N14  | 2640(3) | 7463(2)  | 2422(1) | 15(1)           |
| N24  | 3183(3) | 6744(2)  | 1786(1) | 17(1)           |
| C11  | 5553(4) | 8873(2)  | 350(2)  | 21(1)           |
| C21  | 5597(4) | 8629(2)  | 824(2)  | 16(1)           |
| C31  | 6595(4) | 8445(2)  | 929(2)  | 20(1)           |
| C41  | 6993(4) | 8231(2)  | 1313(2) | 18(1)           |
| C51  | 8134(4) | 8319(2)  | 1317(2) | 24(2)           |
| C61  | 6031(5) | 9417(2)  | 251(2)  | 32(2)           |
| C71  | 4497(4) | 8990(3)  | 191(2)  | 30(2)           |
| C81  | 6194(5) | 8448(3)  | 93(2)   | 34(2)           |
| C91  | 8718(4) | 8054(3)  | 1696(2) | 30(2)           |
| C101 | 8786(4) | 8118(3)  | 938(2)  | 35(2)           |
| C111 | 8107(5) | 8952(3)  | 1281(2) | 37(2)           |
| C12  | 3884(4) | 9007(2)  | 1054(2) | 16(1)           |
| C22  | 2936(4) | 8875(2)  | 974(2)  | 19(1)           |
| C32  | 2116(5) | 9300(2)  | 911(2)  | 23(1)           |
| C42  | 2208(5) | 9842(2)  | 926(2)  | 26(2)           |
| C52  | 3123(5) | 9967(2)  | 1021(2) | 26(2)           |
| C62  | 3965(4) | 9561(2)  | 1097(2) | 18(1)           |
| C72  | 2774(4) | 8286(2)  | 961(2)  | 19(1)           |
| C82  | 2136(5) | 8072(2)  | 1359(2) | 28(2)           |
| C92  | 2262(5) | 8219(3)  | 578(2)  | 29(2)           |
| C102 | 4903(4) | 9715(2)  | 1250(2) | 21(1)           |
| C112 | 4756(5) | 9654(3)  | 1727(2) | 32(2)           |
| C122 | 5137(5) | 10307(2) | 1080(2) | 39(2)           |
| C13  | 6797(4) | 7716(2)  | 2009(2) | 19(1)           |
| C23  | 6760(4) | 7987(2)  | 2358(2) | 21(1)           |

|      |         |         |         |       |
|------|---------|---------|---------|-------|
| C33  | 7168(4) | 7678(3) | 2712(2) | 29(2) |
| C43  | 7585(5) | 7125(3) | 2721(2) | 33(2) |
| C53  | 7585(4) | 6867(3) | 2382(2) | 32(2) |
| C63  | 7168(4) | 7149(3) | 2022(2) | 27(2) |
| C73  | 6324(4) | 8591(2) | 2355(2) | 24(1) |
| C83  | 7029(5) | 8926(3) | 2516(2) | 40(2) |
| C93  | 5281(4) | 8647(3) | 2608(2) | 29(2) |
| C103 | 7137(5) | 6839(2) | 1664(2) | 29(2) |
| C113 | 8196(5) | 6605(3) | 1474(2) | 44(2) |
| C123 | 6503(5) | 6361(3) | 1802(2) | 42(2) |
| C14  | 982(4)  | 7212(2) | 2861(2) | 21(1) |
| C24  | 1807(4) | 7220(2) | 2478(2) | 18(1) |
| C34  | 1569(4) | 6926(2) | 2176(2) | 20(1) |
| C44  | 2199(4) | 6667(2) | 1875(2) | 17(1) |
| C54  | 1615(5) | 6328(2) | 1633(2) | 25(1) |
| C64  | 1166(4) | 7441(2) | 3245(2) | 23(1) |
| C74  | -31(4)  | 7535(3) | 2710(2) | 33(2) |
| C84  | 854(5)  | 6602(3) | 3018(2) | 42(2) |
| C94  | 1180(5) | 6757(2) | 1274(2) | 28(2) |
| C104 | 707(5)  | 6096(2) | 1896(2) | 34(2) |
| C114 | 2245(5) | 5831(3) | 1440(2) | 34(2) |
| C15  | 2858(4) | 7790(2) | 2720(2) | 17(1) |
| C25  | 3499(4) | 7543(2) | 3034(2) | 20(1) |
| C35  | 3700(4) | 7865(3) | 3310(2) | 25(2) |
| C45  | 3306(5) | 8414(3) | 3288(2) | 27(2) |
| C55  | 2696(5) | 8662(2) | 2980(2) | 28(2) |
| C65  | 2455(4) | 8353(2) | 2689(2) | 21(1) |
| C75  | 3962(4) | 6936(2) | 3068(2) | 23(1) |
| C85  | 5076(5) | 6889(3) | 2874(2) | 50(2) |
| C95  | 3913(5) | 6621(3) | 3510(2) | 39(2) |
| C105 | 1794(4) | 8657(2) | 2353(2) | 25(1) |
| C115 | 797(5)  | 8989(3) | 2521(2) | 36(2) |
| C125 | 2400(5) | 9042(2) | 2042(2) | 28(2) |
| C16  | 3931(4) | 6313(2) | 1635(2) | 22(1) |
| C26  | 4368(4) | 6361(2) | 1219(2) | 23(1) |
| C36  | 5067(5) | 5925(2) | 1095(2) | 33(2) |

|      |          |          |          |       |
|------|----------|----------|----------|-------|
| C46  | 5322(5)  | 5442(3)  | 1368(2)  | 41(2) |
| C56  | 4932(5)  | 5401(3)  | 1775(2)  | 35(2) |
| C66  | 4238(5)  | 5833(2)  | 1918(2)  | 26(2) |
| C76  | 4077(5)  | 6855(2)  | 891(2)   | 26(2) |
| C86  | 3597(5)  | 6686(3)  | 533(2)   | 36(2) |
| C96  | 4994(5)  | 7152(3)  | 710(2)   | 38(2) |
| C106 | 3875(5)  | 5771(3)  | 2379(2)  | 31(2) |
| C116 | 4757(5)  | 5545(3)  | 2654(2)  | 44(2) |
| C126 | 3051(5)  | 5396(3)  | 2499(2)  | 47(2) |
| Co3  | 8287(1)  | 2379(1)  | 1710(1)  | 16(1) |
| Co4  | 9492(1)  | 3033(1)  | 1399(1)  | 14(1) |
| N211 | 6808(3)  | 2362(2)  | 1690(1)  | 19(1) |
| N221 | 8554(3)  | 1660(2)  | 2068(1)  | 19(1) |
| N214 | 10436(3) | 3069(2)  | 889(1)   | 14(1) |
| N224 | 9986(3)  | 3626(2)  | 1619(1)  | 16(1) |
| C231 | 6780(5)  | 1717(2)  | 2314(2)  | 27(2) |
| C241 | 7797(5)  | 1503(2)  | 2358(2)  | 24(1) |
| C251 | 8004(5)  | 1117(3)  | 2785(2)  | 32(2) |
| C221 | 6281(4)  | 2052(3)  | 1981(2)  | 25(2) |
| C211 | 5136(6)  | 1969(5)  | 1993(3)  | 33(2) |
| C261 | 4579(8)  | 2050(14) | 2420(3)  | 62(5) |
| C271 | 5150(12) | 1354(4)  | 1933(9)  | 48(4) |
| C281 | 4464(4)  | 2322(3)  | 1666(2)  | 32(2) |
| C21" | 5101(13) | 2037(16) | 2026(8)  | 33(2) |
| C26" | 4590(30) | 2270(40) | 2417(11) | 62(5) |
| C27" | 5000(40) | 1407(18) | 2080(30) | 48(4) |
| C28" | 4464(4)  | 2322(3)  | 1666(2)  | 32(2) |
| C291 | 7969(5)  | 1521(3)  | 3096(2)  | 38(2) |
| C301 | 7121(6)  | 766(3)   | 2933(2)  | 49(2) |
| C311 | 8985(5)  | 716(3)   | 2811(2)  | 40(2) |
| C212 | 6331(4)  | 2743(3)  | 1364(2)  | 24(2) |
| C222 | 6289(4)  | 2595(2)  | 970(2)   | 21(1) |
| C232 | 5822(4)  | 2981(3)  | 669(2)   | 26(2) |
| C242 | 5431(4)  | 3514(3)  | 745(2)   | 29(2) |
| C252 | 5476(4)  | 3660(3)  | 1130(2)  | 30(2) |
| C262 | 5931(4)  | 3284(3)  | 1439(2)  | 24(2) |



|      |          |         |         |       |
|------|----------|---------|---------|-------|
| C272 | 6747(5)  | 2014(3) | 877(2)  | 27(2) |
| C282 | 7719(5)  | 2049(2) | 581(2)  | 29(2) |
| C292 | 5999(5)  | 1734(3) | 689(2)  | 40(2) |
| C302 | 5971(4)  | 3471(3) | 1860(2) | 31(2) |
| C312 | 6631(5)  | 3931(3) | 1809(2) | 40(2) |
| C322 | 4904(5)  | 3677(3) | 2064(2) | 54(2) |
| C213 | 9479(4)  | 1287(2) | 1997(2) | 19(1) |
| C223 | 10413(4) | 1401(2) | 2082(2) | 21(1) |
| C233 | 11286(5) | 1015(2) | 2015(2) | 31(2) |
| C243 | 11236(5) | 527(2)  | 1874(2) | 37(2) |
| C253 | 10303(6) | 430(2)  | 1769(2) | 37(2) |
| C263 | 9415(5)  | 808(2)  | 1821(2) | 26(2) |
| C273 | 10535(5) | 1924(2) | 2251(2) | 22(1) |
| C283 | 10929(5) | 1792(3) | 2682(2) | 44(2) |
| C293 | 11239(5) | 2268(3) | 1955(2) | 35(2) |
| C303 | 8432(5)  | 700(3)  | 1675(2) | 39(2) |
| C313 | 8524(6)  | 701(3)  | 1212(2) | 50(2) |
| C323 | 8094(7)  | 154(3)  | 1896(2) | 69(3) |
| C214 | 11957(4) | 3450(3) | 417(2)  | 26(2) |
| C224 | 11248(4) | 3325(2) | 832(2)  | 21(1) |
| C234 | 11519(4) | 3566(2) | 1159(2) | 23(1) |
| C244 | 10953(4) | 3744(2) | 1506(2) | 18(1) |
| C254 | 11572(4) | 4026(2) | 1778(2) | 24(1) |
| C264 | 11930(5) | 3119(3) | 58(2)   | 32(2) |
| C274 | 13092(5) | 3364(3) | 501(2)  | 42(2) |
| C284 | 11645(5) | 4073(3) | 251(2)  | 41(2) |
| C294 | 10975(5) | 4480(2) | 2024(2) | 32(2) |
| C304 | 12068(5) | 3550(3) | 2088(2) | 30(2) |
| C314 | 12460(4) | 4298(2) | 1518(2) | 27(2) |
| C215 | 10152(4) | 2812(2) | 560(2)  | 19(1) |
| C225 | 9493(4)  | 3129(2) | 277(2)  | 21(1) |
| C235 | 9308(4)  | 2889(3) | -57(2)  | 26(2) |
| C245 | 9732(5)  | 2357(3) | -100(2) | 33(2) |
| C255 | 10332(5) | 2039(3) | 189(2)  | 29(2) |
| C265 | 10539(4) | 2252(2) | 534(2)  | 21(1) |
| C275 | 8984(4)  | 3712(2) | 325(2)  | 24(1) |

|      |          |          |          |       |
|------|----------|----------|----------|-------|
| C285 | 7911(5)  | 3690(3)  | 533(2)   | 50(2) |
| C295 | 8952(6)  | 4104(3)  | -92(2)   | 47(2) |
| C305 | 11125(4) | 1877(2)  | 873(2)   | 24(1) |
| C315 | 11201(5) | 1266(2)  | 844(2)   | 39(2) |
| C325 | 12199(4) | 2006(3)  | 906(2)   | 32(2) |
| C216 | 9269(4)  | 4008(2)  | 1840(2)  | 17(1) |
| C226 | 8936(4)  | 3879(2)  | 2259(2)  | 19(1) |
| C236 | 8306(4)  | 4285(2)  | 2456(2)  | 24(1) |
| C246 | 7972(5)  | 4803(2)  | 2240(2)  | 28(2) |
| C256 | 8252(4)  | 4910(2)  | 1820(2)  | 25(1) |
| C266 | 8883(4)  | 4521(2)  | 1613(2)  | 23(1) |
| C276 | 9262(4)  | 3325(2)  | 2523(2)  | 21(1) |
| C286 | 9839(5)  | 3395(3)  | 2887(2)  | 31(2) |
| C296 | 8351(5)  | 3025(3)  | 2688(2)  | 33(2) |
| C306 | 9128(5)  | 4658(2)  | 1147(2)  | 25(1) |
| C316 | 9931(5)  | 5049(3)  | 1026(2)  | 43(2) |
| C326 | 8158(5)  | 4919(3)  | 931(2)   | 41(2) |
| Co5  | 1779(1)  | 2193(1)  | 5060(1)  | 16(1) |
| Co6  | 2987(1)  | 2823(1)  | 4697(1)  | 16(1) |
| N411 | 287(3)   | 2194(2)  | 5050(1)  | 18(1) |
| N421 | 1999(3)  | 1526(2)  | 5478(1)  | 17(1) |
| N414 | 3486(3)  | 3460(2)  | 4865(1)  | 17(1) |
| C411 | -1417(4) | 1878(2)  | 5396(2)  | 24(1) |
| C421 | -255(4)  | 1935(2)  | 5366(2)  | 20(1) |
| C431 | 214(5)   | 1651(2)  | 5718(2)  | 23(2) |
| C441 | 1228(5)  | 1427(2)  | 5777(2)  | 21(1) |
| C461 | -2053(4) | 2153(3)  | 5033(2)  | 28(2) |
| C471 | -1473(5) | 1245(3)  | 5431(2)  | 47(2) |
| C481 | -1965(5) | 2095(3)  | 5789(2)  | 45(2) |
| C451 | 1435(15) | 1103(8)  | 6228(4)  | 21(2) |
| C491 | 1130(30) | 1512(13) | 6532(15) | 31(5) |
| C501 | 724(13)  | 642(7)   | 6324(5)  | 35(2) |
| C511 | 2521(13) | 821(8)   | 6308(5)  | 35(2) |
| C45" | 1296(16) | 1103(9)  | 6238(4)  | 21(2) |
| C49" | 1360(30) | 1550(14) | 6495(17) | 31(5) |
| C50" | 339(14)  | 819(8)   | 6429(5)  | 35(2) |

|      |          |          |          |       |
|------|----------|----------|----------|-------|
| C51" | 2224(15) | 651(8)   | 6315(6)  | 35(2) |
| C412 | -173(4)  | 2533(2)  | 4700(2)  | 15(1) |
| C422 | -206(4)  | 2307(2)  | 4330(2)  | 18(1) |
| C432 | -676(4)  | 2648(2)  | 4009(2)  | 23(1) |
| C442 | -1089(4) | 3185(3)  | 4034(2)  | 28(2) |
| C452 | -1024(4) | 3405(2)  | 4389(2)  | 26(2) |
| C462 | -562(4)  | 3090(2)  | 4724(2)  | 19(1) |
| C472 | 231(4)   | 1708(2)  | 4295(2)  | 23(1) |
| C482 | -491(5)  | 1400(3)  | 4121(2)  | 47(2) |
| C492 | 1229(5)  | 1696(3)  | 4014(2)  | 50(2) |
| C502 | -507(4)  | 3355(2)  | 5107(2)  | 26(2) |
| C512 | -1567(5) | 3587(3)  | 5297(2)  | 43(2) |
| C522 | 154(4)   | 3821(2)  | 4996(2)  | 30(2) |
| C413 | 2895(5)  | 1113(2)  | 5458(2)  | 21(1) |
| C423 | 3855(5)  | 1230(2)  | 5531(2)  | 25(2) |
| C433 | 4700(5)  | 806(3)   | 5530(2)  | 40(2) |
| C443 | 4607(6)  | 290(3)   | 5459(2)  | 45(2) |
| C453 | 3672(5)  | 186(2)   | 5365(2)  | 34(2) |
| C463 | 2811(5)  | 586(2)   | 5361(2)  | 23(1) |
| C473 | 4035(7)  | 1807(3)  | 5586(3)  | 22(2) |
| C483 | 4638(6)  | 2091(4)  | 5210(3)  | 30(2) |
| C493 | 4533(8)  | 1805(4)  | 5986(3)  | 44(3) |
| C47' | 3970(30) | 1717(10) | 5744(8)  | 22(2) |
| C48' | 4790(20) | 1961(14) | 5444(11) | 30(2) |
| C49' | 4280(30) | 1584(17) | 6188(10) | 44(3) |
| C503 | 1823(5)  | 458(3)   | 5233(2)  | 34(2) |
| C513 | 1634(11) | -135(4)  | 5446(3)  | 57(4) |
| C523 | 1892(6)  | 437(3)   | 4770(2)  | 57(2) |
| C50Z | 1823(5)  | 458(3)   | 5233(2)  | 34(2) |
| C51Z | 990(30)  | 127(19)  | 5476(11) | 57(4) |
| C52Z | 1892(6)  | 437(3)   | 4770(2)  | 57(2) |
| C414 | 5608(4)  | 3042(3)  | 3746(2)  | 26(2) |
| C424 | 4796(4)  | 3022(2)  | 4138(2)  | 19(1) |
| C434 | 5073(4)  | 3288(2)  | 4449(2)  | 21(1) |
| C444 | 4474(4)  | 3532(2)  | 4763(2)  | 19(1) |
| C454 | 5098(4)  | 3841(2)  | 5017(2)  | 21(1) |

|      |          |         |         |       |
|------|----------|---------|---------|-------|
| C464 | 5369(5)  | 2841(3) | 3354(2) | 33(2) |
| C474 | 6613(4)  | 2681(3) | 3881(2) | 39(2) |
| C484 | 5780(5)  | 3648(3) | 3612(2) | 37(2) |
| C494 | 5583(4)  | 3382(2) | 5343(2) | 26(2) |
| C504 | 5980(4)  | 4095(2) | 4740(2) | 28(2) |
| C514 | 4516(4)  | 4313(2) | 5243(2) | 26(2) |
| C415 | 3630(4)  | 2528(3) | 3869(2) | 21(1) |
| C425 | 2951(4)  | 2836(3) | 3588(2) | 23(2) |
| C435 | 2668(5)  | 2571(3) | 3290(2) | 35(2) |
| C445 | 3018(5)  | 2024(3) | 3271(2) | 37(2) |
| C455 | 3667(5)  | 1720(3) | 3547(2) | 33(2) |
| C465 | 3982(4)  | 1964(2) | 3857(2) | 20(1) |
| C475 | 2545(4)  | 3438(3) | 3617(2) | 26(2) |
| C485 | 1467(5)  | 3476(3) | 3835(2) | 43(2) |
| C495 | 2556(6)  | 3817(3) | 3195(2) | 49(2) |
| C505 | 4696(4)  | 1610(2) | 4152(2) | 29(2) |
| C515 | 4117(5)  | 1200(2) | 4451(2) | 37(2) |
| C525 | 5640(5)  | 1289(3) | 3938(2) | 40(2) |
| C416 | 2778(4)  | 3864(2) | 5065(2) | 17(1) |
| N424 | 3938(3)  | 2795(2) | 4187(1) | 18(1) |
| C426 | 2429(4)  | 3765(2) | 5489(2) | 21(1) |
| C436 | 1812(4)  | 4195(2) | 5669(2) | 24(2) |
| C446 | 1520(4)  | 4704(2) | 5439(2) | 28(2) |
| C456 | 1802(5)  | 4787(2) | 5020(2) | 28(2) |
| C466 | 2419(4)  | 4375(2) | 4824(2) | 21(1) |
| C476 | 2724(5)  | 3221(2) | 5769(2) | 23(1) |
| C486 | 1785(5)  | 2946(3) | 5936(2) | 47(2) |
| C496 | 3275(5)  | 3301(3) | 6140(2) | 42(2) |
| C506 | 2650(5)  | 4484(2) | 4353(2) | 27(2) |
| C516 | 3535(5)  | 4820(3) | 4222(2) | 39(2) |
| C526 | 1725(5)  | 4789(3) | 4132(2) | 41(2) |
| C17  | 6359(13) | 4974(9) | -429(6) | 90(3) |
| C27  | 5456(9)  | 4966(7) | -105(5) | 90(3) |
| C37  | 5404(9)  | 4971(5) | 320(5)  | 54(2) |
| C47  | 4462(11) | 4991(5) | 555(4)  | 65(3) |
| C57  | 3573(9)  | 5006(6) | 365(4)  | 90(3) |

|      |           |          |          |       |
|------|-----------|----------|----------|-------|
| C67  | 3626(9)   | 5001(5)  | -60(4)   | 65(3) |
| C77  | 4567(11)  | 4981(6)  | -295(4)  | 54(2) |
| C87  | 8027(8)   | 335(5)   | 213(4)   | 37(3) |
| C97  | 9159(9)   | 146(12)  | 94(9)    | 28(3) |
| C107 | 9860(10)  | 517(12)  | 59(10)   | 36(4) |
| C117 | 10891(10) | 346(12)  | -51(10)  | 39(4) |
| C127 | 11220(9)  | -196(12) | -125(10) | 28(3) |
| C137 | 10519(10) | -568(12) | -89(10)  | 36(4) |
| C147 | 9488(10)  | -397(12) | 20(10)   | 39(4) |
| C157 | 1587(10)  | 129(7)   | 3585(4)  | 86(5) |
| C167 | 2630(5)   | 143(3)   | 3386(2)  | 43(3) |
| C177 | 3474(6)   | 10(3)    | 3616(2)  | 52(3) |
| C187 | 4455(5)   | 21(4)    | 3418(3)  | 69(4) |
| C197 | 4592(5)   | 167(3)   | 2990(3)  | 78(5) |
| C207 | 3748(7)   | 301(3)   | 2759(2)  | 77(4) |
| C217 | 2767(6)   | 289(3)   | 2957(2)  | 46(3) |
| C15' | 4883(19)  | -80(15)  | 3258(11) | 78(5) |
| C16' | 3756(12)  | 40(8)    | 3290(7)  | 43(3) |
| C17' | 3249(16)  | 180(9)   | 2931(5)  | 46(3) |
| C18' | 2185(16)  | 248(11)  | 2958(6)  | 69(4) |
| C19' | 1629(12)  | 175(11)  | 3344(7)  | 86(5) |
| C20' | 2135(17)  | 35(11)   | 3703(6)  | 77(4) |
| C21' | 3199(17)  | -32(10)  | 3676(5)  | 52(3) |
| C227 | 6291(8)   | 5223(5)  | 3613(4)  | 45(3) |
| C237 | 7420(6)   | 5159(5)  | 3461(4)  | 38(3) |
| C247 | 8074(8)   | 4705(5)  | 3639(5)  | 42(3) |
| C257 | 9118(7)   | 4650(5)  | 3515(4)  | 39(3) |
| C267 | 9507(6)   | 5049(5)  | 3214(4)  | 38(3) |
| C277 | 8853(7)   | 5502(5)  | 3036(4)  | 42(3) |
| C287 | 7809(7)   | 5557(5)  | 3160(4)  | 39(3) |
| C22' | 10229(11) | 5051(7)  | 3096(6)  | 45(3) |
| C23' | 9101(10)  | 5111(9)  | 3253(7)  | 38(3) |
| C24' | 8415(11)  | 5545(8)  | 3072(7)  | 42(3) |
| C25' | 7374(11)  | 5577(9)  | 3198(7)  | 39(3) |
| C26' | 7020(10)  | 5175(9)  | 3505(8)  | 38(3) |
| C27' | 7706(13)  | 4740(9)  | 3686(8)  | 42(3) |

C28'

8746(12)

4708(9)

3560(7)

39(3)

---

Table 3. Bond lengths [Å] and angles [°] for holkd15.

|              |            |               |          |
|--------------|------------|---------------|----------|
| Co(1)-N(11)  | 1.972(4)   | C(81)-H(81A)  | 0.9800   |
| Co(1)-N(21)  | 1.993(4)   | C(81)-H(81B)  | 0.9800   |
| Co(1)-Co(2)  | 2.4750(12) | C(81)-H(81C)  | 0.9800   |
| Co(1)-H(1)   | 1.75(5)    | C(91)-H(91A)  | 0.9800   |
| Co(1)-H(2)   | 1.59(5)    | C(91)-H(91B)  | 0.9800   |
| Co(2)-N(24)  | 1.967(4)   | C(91)-H(91C)  | 0.9800   |
| Co(2)-N(14)  | 1.971(4)   | C(101)-H(10A) | 0.9800   |
| Co(2)-H(1)   | 1.43(5)    | C(101)-H(10B) | 0.9800   |
| Co(2)-H(2)   | 1.52(5)    | C(101)-H(10C) | 0.9800   |
| N(11)-C(21)  | 1.356(6)   | C(111)-H(11A) | 0.9800   |
| N(11)-C(12)  | 1.434(7)   | C(111)-H(11B) | 0.9800   |
| N(21)-C(41)  | 1.331(6)   | C(111)-H(11C) | 0.9800   |
| N(21)-C(13)  | 1.445(7)   | C(12)-C(22)   | 1.413(7) |
| N(14)-C(24)  | 1.321(6)   | C(12)-C(62)   | 1.417(7) |
| N(14)-C(15)  | 1.444(7)   | C(22)-C(32)   | 1.394(8) |
| N(24)-C(44)  | 1.342(7)   | C(22)-C(72)   | 1.509(7) |
| N(24)-C(16)  | 1.441(7)   | C(32)-C(42)   | 1.370(7) |
| C(11)-C(71)  | 1.521(8)   | C(32)-H(32A)  | 0.9500   |
| C(11)-C(81)  | 1.540(8)   | C(42)-C(52)   | 1.381(8) |
| C(11)-C(61)  | 1.544(8)   | C(42)-H(42A)  | 0.9500   |
| C(11)-C(21)  | 1.578(7)   | C(52)-C(62)   | 1.391(8) |
| C(21)-C(31)  | 1.392(7)   | C(52)-H(52A)  | 0.9500   |
| C(31)-C(41)  | 1.412(7)   | C(62)-C(102)  | 1.519(8) |
| C(31)-H(31A) | 0.9500     | C(72)-C(82)   | 1.537(8) |
| C(41)-C(51)  | 1.566(8)   | C(72)-C(92)   | 1.539(7) |
| C(51)-C(101) | 1.534(8)   | C(72)-H(72A)  | 1.0000   |
| C(51)-C(91)  | 1.537(8)   | C(82)-H(82A)  | 0.9800   |
| C(51)-C(111) | 1.540(8)   | C(82)-H(82B)  | 0.9800   |
| C(61)-H(61A) | 0.9800     | C(82)-H(82C)  | 0.9800   |
| C(61)-H(61B) | 0.9800     | C(92)-H(92A)  | 0.9800   |
| C(61)-H(61C) | 0.9800     | C(92)-H(92B)  | 0.9800   |
| C(71)-H(71A) | 0.9800     | C(92)-H(92C)  | 0.9800   |
| C(71)-H(71B) | 0.9800     | C(102)-C(112) | 1.539(8) |
| C(71)-H(71C) | 0.9800     | C(102)-C(122) | 1.540(7) |

|               |          |               |          |
|---------------|----------|---------------|----------|
| C(102)-H(10D) | 1.0000   | C(14)-C(64)   | 1.523(7) |
| C(112)-H(11D) | 0.9800   | C(14)-C(84)   | 1.536(8) |
| C(112)-H(11E) | 0.9800   | C(14)-C(74)   | 1.539(8) |
| C(112)-H(11F) | 0.9800   | C(14)-C(24)   | 1.568(7) |
| C(122)-H(12A) | 0.9800   | C(24)-C(34)   | 1.409(7) |
| C(122)-H(12B) | 0.9800   | C(34)-C(44)   | 1.389(7) |
| C(122)-H(12C) | 0.9800   | C(34)-H(34A)  | 0.9500   |
| C(13)-C(63)   | 1.400(8) | C(44)-C(54)   | 1.579(8) |
| C(13)-C(23)   | 1.407(8) | C(54)-C(104)  | 1.531(8) |
| C(23)-C(33)   | 1.394(8) | C(54)-C(94)   | 1.545(8) |
| C(23)-C(73)   | 1.508(8) | C(54)-C(114)  | 1.549(8) |
| C(33)-C(43)   | 1.381(8) | C(64)-H(64A)  | 0.9800   |
| C(33)-H(33A)  | 0.9500   | C(64)-H(64B)  | 0.9800   |
| C(43)-C(53)   | 1.371(9) | C(64)-H(64C)  | 0.9800   |
| C(43)-H(43A)  | 0.9500   | C(74)-H(74A)  | 0.9800   |
| C(53)-C(63)   | 1.391(8) | C(74)-H(74B)  | 0.9800   |
| C(53)-H(53A)  | 0.9500   | C(74)-H(74C)  | 0.9800   |
| C(63)-C(103)  | 1.511(8) | C(84)-H(84A)  | 0.9800   |
| C(73)-C(93)   | 1.529(8) | C(84)-H(84B)  | 0.9800   |
| C(73)-C(83)   | 1.529(8) | C(84)-H(84C)  | 0.9800   |
| C(73)-H(73A)  | 1.0000   | C(94)-H(94A)  | 0.9800   |
| C(83)-H(83A)  | 0.9800   | C(94)-H(94B)  | 0.9800   |
| C(83)-H(83B)  | 0.9800   | C(94)-H(94C)  | 0.9800   |
| C(83)-H(83C)  | 0.9800   | C(104)-H(10F) | 0.9800   |
| C(93)-H(93A)  | 0.9800   | C(104)-H(10G) | 0.9800   |
| C(93)-H(93B)  | 0.9800   | C(104)-H(10H) | 0.9800   |
| C(93)-H(93C)  | 0.9800   | C(114)-H(11J) | 0.9800   |
| C(103)-C(123) | 1.534(8) | C(114)-H(11K) | 0.9800   |
| C(103)-C(113) | 1.535(8) | C(114)-H(11L) | 0.9800   |
| C(103)-H(10E) | 1.0000   | C(15)-C(65)   | 1.396(7) |
| C(113)-H(11G) | 0.9800   | C(15)-C(25)   | 1.409(8) |
| C(113)-H(11H) | 0.9800   | C(25)-C(35)   | 1.369(8) |
| C(113)-H(11I) | 0.9800   | C(25)-C(75)   | 1.514(8) |
| C(123)-H(12D) | 0.9800   | C(35)-C(45)   | 1.362(8) |
| C(123)-H(12E) | 0.9800   | C(35)-H(35A)  | 0.9500   |
| C(123)-H(12F) | 0.9800   | C(45)-C(55)   | 1.370(8) |



|               |          |               |            |
|---------------|----------|---------------|------------|
| C(45)-H(45A)  | 0.9500   | C(86)-H(86A)  | 0.9800     |
| C(55)-C(65)   | 1.406(8) | C(86)-H(86B)  | 0.9800     |
| C(55)-H(55A)  | 0.9500   | C(86)-H(86C)  | 0.9800     |
| C(65)-C(105)  | 1.514(8) | C(96)-H(96A)  | 0.9800     |
| C(75)-C(95)   | 1.530(8) | C(96)-H(96B)  | 0.9800     |
| C(75)-C(85)   | 1.536(8) | C(96)-H(96C)  | 0.9800     |
| C(75)-H(75A)  | 1.0000   | C(106)-C(126) | 1.521(8)   |
| C(85)-H(85A)  | 0.9800   | C(106)-C(116) | 1.537(8)   |
| C(85)-H(85B)  | 0.9800   | C(106)-H(10J) | 1.0000     |
| C(85)-H(85C)  | 0.9800   | C(116)-H(11P) | 0.9800     |
| C(95)-H(95A)  | 0.9800   | C(116)-H(11Q) | 0.9800     |
| C(95)-H(95B)  | 0.9800   | C(116)-H(11R) | 0.9800     |
| C(95)-H(95C)  | 0.9800   | C(126)-H(12J) | 0.9800     |
| C(105)-C(125) | 1.524(7) | C(126)-H(12K) | 0.9800     |
| C(105)-C(115) | 1.537(8) | C(126)-H(12L) | 0.9800     |
| C(105)-H(10I) | 1.0000   | Co(3)-N(221)  | 1.962(4)   |
| C(115)-H(11M) | 0.9800   | Co(3)-N(211)  | 1.980(5)   |
| C(115)-H(11N) | 0.9800   | Co(3)-Co(4)   | 2.4716(11) |
| C(115)-H(11O) | 0.9800   | Co(3)-H(3)    | 1.64(5)    |
| C(125)-H(12G) | 0.9800   | Co(3)-H(4)    | 1.54(5)    |
| C(125)-H(12H) | 0.9800   | Co(4)-N(224)  | 1.962(4)   |
| C(125)-H(12I) | 0.9800   | Co(4)-N(214)  | 1.970(4)   |
| C(16)-C(66)   | 1.414(8) | Co(4)-H(3)    | 1.46(5)    |
| C(16)-C(26)   | 1.415(8) | Co(4)-H(4)    | 1.58(5)    |
| C(26)-C(36)   | 1.385(8) | N(211)-C(221) | 1.326(7)   |
| C(26)-C(76)   | 1.516(8) | N(211)-C(212) | 1.436(7)   |
| C(36)-C(46)   | 1.387(8) | N(221)-C(241) | 1.360(7)   |
| C(36)-H(36A)  | 0.9500   | N(221)-C(213) | 1.432(7)   |
| C(46)-C(56)   | 1.366(9) | N(214)-C(224) | 1.314(7)   |
| C(46)-H(46A)  | 0.9500   | N(214)-C(215) | 1.449(7)   |
| C(56)-C(66)   | 1.398(8) | N(224)-C(244) | 1.360(7)   |
| C(56)-H(56A)  | 0.9500   | N(224)-C(216) | 1.447(6)   |
| C(66)-C(106)  | 1.523(8) | C(231)-C(241) | 1.384(8)   |
| C(76)-C(96)   | 1.532(8) | C(231)-C(221) | 1.416(8)   |
| C(76)-C(86)   | 1.541(8) | C(231)-H(23A) | 0.9500     |
| C(76)-H(76A)  | 1.0000   | C(241)-C(251) | 1.584(8)   |

|               |           |               |          |
|---------------|-----------|---------------|----------|
| C(251)-C(311) | 1.506(9)  | C(222)-C(232) | 1.382(8) |
| C(251)-C(291) | 1.529(8)  | C(222)-C(272) | 1.528(8) |
| C(251)-C(301) | 1.555(8)  | C(232)-C(242) | 1.384(8) |
| C(221)-C(211) | 1.562(9)  | C(232)-H(23B) | 0.9500   |
| C(221)-C(21") | 1.563(17) | C(242)-C(252) | 1.380(8) |
| C(211)-C(261) | 1.533(10) | C(242)-H(24A) | 0.9500   |
| C(211)-C(281) | 1.540(9)  | C(252)-C(262) | 1.379(8) |
| C(211)-C(271) | 1.558(10) | C(252)-H(25A) | 0.9500   |
| C(261)-H(26A) | 0.9800    | C(262)-C(302) | 1.535(8) |
| C(261)-H(26B) | 0.9800    | C(272)-C(282) | 1.528(8) |
| C(261)-H(26C) | 0.9800    | C(272)-C(292) | 1.532(8) |
| C(271)-H(27A) | 0.9800    | C(272)-H(27G) | 1.0000   |
| C(271)-H(27B) | 0.9800    | C(282)-H(28G) | 0.9800   |
| C(271)-H(27C) | 0.9800    | C(282)-H(28H) | 0.9800   |
| C(281)-H(28A) | 0.9800    | C(282)-H(28I) | 0.9800   |
| C(281)-H(28B) | 0.9800    | C(292)-H(29D) | 0.9800   |
| C(281)-H(28C) | 0.9800    | C(292)-H(29E) | 0.9800   |
| C(21")-C(26") | 1.533(18) | C(292)-H(29F) | 0.9800   |
| C(21")-C(27") | 1.559(19) | C(302)-C(312) | 1.518(8) |
| C(26")-H(26D) | 0.9800    | C(302)-C(322) | 1.542(8) |
| C(26")-H(26E) | 0.9800    | C(302)-H(30D) | 1.0000   |
| C(26")-H(26F) | 0.9800    | C(312)-H(31E) | 0.9800   |
| C(27")-H(27D) | 0.9800    | C(312)-H(31F) | 0.9800   |
| C(27")-H(27E) | 0.9800    | C(312)-H(31G) | 0.9800   |
| C(27")-H(27F) | 0.9800    | C(322)-H(32B) | 0.9800   |
| C(291)-H(29A) | 0.9800    | C(322)-H(32C) | 0.9800   |
| C(291)-H(29B) | 0.9800    | C(322)-H(32D) | 0.9800   |
| C(291)-H(29C) | 0.9800    | C(213)-C(223) | 1.385(8) |
| C(301)-H(30A) | 0.9800    | C(213)-C(263) | 1.414(7) |
| C(301)-H(30B) | 0.9800    | C(223)-C(233) | 1.398(8) |
| C(301)-H(30C) | 0.9800    | C(223)-C(273) | 1.519(7) |
| C(311)-H(31B) | 0.9800    | C(233)-C(243) | 1.371(8) |
| C(311)-H(31C) | 0.9800    | C(233)-H(23C) | 0.9500   |
| C(311)-H(31D) | 0.9800    | C(243)-C(253) | 1.389(9) |
| C(212)-C(262) | 1.405(8)  | C(243)-H(24B) | 0.9500   |
| C(212)-C(222) | 1.406(8)  | C(253)-C(263) | 1.392(8) |

|               |          |               |          |
|---------------|----------|---------------|----------|
| C(253)-H(25B) | 0.9500   | C(274)-H(27L) | 0.9800   |
| C(263)-C(303) | 1.516(9) | C(284)-H(28M) | 0.9800   |
| C(273)-C(293) | 1.520(8) | C(284)-H(28N) | 0.9800   |
| C(273)-C(283) | 1.532(8) | C(284)-H(28O) | 0.9800   |
| C(273)-H(27H) | 1.0000   | C(294)-H(29J) | 0.9800   |
| C(283)-H(28J) | 0.9800   | C(294)-H(29K) | 0.9800   |
| C(283)-H(28K) | 0.9800   | C(294)-H(29L) | 0.9800   |
| C(283)-H(28L) | 0.9800   | C(304)-H(30F) | 0.9800   |
| C(293)-H(29G) | 0.9800   | C(304)-H(30G) | 0.9800   |
| C(293)-H(29H) | 0.9800   | C(304)-H(30H) | 0.9800   |
| C(293)-H(29I) | 0.9800   | C(314)-H(31K) | 0.9800   |
| C(303)-C(313) | 1.508(9) | C(314)-H(31L) | 0.9800   |
| C(303)-C(323) | 1.529(9) | C(314)-H(31M) | 0.9800   |
| C(303)-H(30E) | 1.0000   | C(215)-C(225) | 1.402(8) |
| C(313)-H(31H) | 0.9800   | C(215)-C(265) | 1.406(8) |
| C(313)-H(31I) | 0.9800   | C(225)-C(235) | 1.391(8) |
| C(313)-H(31J) | 0.9800   | C(225)-C(275) | 1.509(8) |
| C(323)-H(32E) | 0.9800   | C(235)-C(245) | 1.363(8) |
| C(323)-H(32F) | 0.9800   | C(235)-H(23E) | 0.9500   |
| C(323)-H(32G) | 0.9800   | C(245)-C(255) | 1.370(9) |
| C(214)-C(274) | 1.540(8) | C(245)-H(24C) | 0.9500   |
| C(214)-C(264) | 1.544(8) | C(255)-C(265) | 1.393(8) |
| C(214)-C(284) | 1.548(8) | C(255)-H(25C) | 0.9500   |
| C(214)-C(224) | 1.581(7) | C(265)-C(305) | 1.527(8) |
| C(224)-C(234) | 1.413(8) | C(275)-C(285) | 1.514(8) |
| C(234)-C(244) | 1.383(7) | C(275)-C(295) | 1.541(8) |
| C(234)-H(23D) | 0.9500   | C(275)-H(27M) | 1.0000   |
| C(244)-C(254) | 1.584(8) | C(285)-H(28P) | 0.9800   |
| C(254)-C(304) | 1.537(8) | C(285)-H(28Q) | 0.9800   |
| C(254)-C(314) | 1.549(7) | C(285)-H(28R) | 0.9800   |
| C(254)-C(294) | 1.548(8) | C(295)-H(29M) | 0.9800   |
| C(264)-H(26H) | 0.9800   | C(295)-H(29N) | 0.9800   |
| C(264)-H(26I) | 0.9800   | C(295)-H(29O) | 0.9800   |
| C(264)-H(26J) | 0.9800   | C(305)-C(315) | 1.511(7) |
| C(274)-H(27I) | 0.9800   | C(305)-C(325) | 1.529(8) |
| C(274)-H(27J) | 0.9800   | C(305)-H(30I) | 1.0000   |

|               |          |               |            |
|---------------|----------|---------------|------------|
| C(315)-H(31N) | 0.9800   | Co(5)-N(411)  | 1.985(5)   |
| C(315)-H(31O) | 0.9800   | Co(5)-Co(6)   | 2.4808(12) |
| C(315)-H(31P) | 0.9800   | Co(5)-H(5)    | 1.59(5)    |
| C(325)-H(32H) | 0.9800   | Co(5)-H(6)    | 1.44(5)    |
| C(325)-H(32I) | 0.9800   | Co(6)-N(414)  | 1.975(4)   |
| C(325)-H(32J) | 0.9800   | Co(6)-N(424)  | 1.981(4)   |
| C(216)-C(226) | 1.395(7) | Co(6)-H(5)    | 1.48(5)    |
| C(216)-C(266) | 1.408(7) | Co(6)-H(6)    | 1.49(5)    |
| C(226)-C(236) | 1.392(7) | N(411)-C(421) | 1.326(6)   |
| C(226)-C(276) | 1.519(8) | N(411)-C(412) | 1.438(7)   |
| C(236)-C(246) | 1.384(8) | N(421)-C(441) | 1.356(7)   |
| C(236)-H(23F) | 0.9500   | N(421)-C(413) | 1.439(7)   |
| C(246)-C(256) | 1.378(8) | N(414)-C(444) | 1.348(6)   |
| C(246)-H(24D) | 0.9500   | N(414)-C(416) | 1.443(7)   |
| C(256)-C(266) | 1.381(8) | C(411)-C(481) | 1.538(8)   |
| C(256)-H(25D) | 0.9500   | C(411)-C(461) | 1.540(8)   |
| C(266)-C(306) | 1.521(8) | C(411)-C(471) | 1.555(8)   |
| C(276)-C(296) | 1.519(8) | C(411)-C(421) | 1.563(8)   |
| C(276)-C(286) | 1.536(8) | C(421)-C(431) | 1.404(8)   |
| C(276)-H(27N) | 1.0000   | C(431)-C(441) | 1.394(8)   |
| C(286)-H(28T) | 0.9800   | C(431)-H(43B) | 0.9500     |
| C(286)-H(28U) | 0.9800   | C(441)-C(451) | 1.592(9)   |
| C(286)-H(28V) | 0.9800   | C(441)-C(45") | 1.594(9)   |
| C(296)-H(29P) | 0.9800   | C(461)-H(46B) | 0.9800     |
| C(296)-H(29Q) | 0.9800   | C(461)-H(46C) | 0.9800     |
| C(296)-H(29R) | 0.9800   | C(461)-H(46D) | 0.9800     |
| C(306)-C(316) | 1.526(8) | C(471)-H(47A) | 0.9800     |
| C(306)-C(326) | 1.538(8) | C(471)-H(47B) | 0.9800     |
| C(306)-H(30J) | 1.0000   | C(471)-H(47C) | 0.9800     |
| C(316)-H(31Q) | 0.9800   | C(481)-H(48A) | 0.9800     |
| C(316)-H(31R) | 0.9800   | C(481)-H(48B) | 0.9800     |
| C(316)-H(31S) | 0.9800   | C(481)-H(48C) | 0.9800     |
| C(326)-H(32K) | 0.9800   | C(451)-C(491) | 1.509(14)  |
| C(326)-H(32L) | 0.9800   | C(451)-C(511) | 1.530(13)  |
| C(326)-H(32M) | 0.9800   | C(451)-C(501) | 1.562(15)  |
| Co(5)-N(421)  | 1.965(4) | C(491)-H(49A) | 0.9800     |

|               |           |               |           |
|---------------|-----------|---------------|-----------|
| C(491)-H(49B) | 0.9800    | C(482)-H(48F) | 0.9800    |
| C(491)-H(49C) | 0.9800    | C(492)-H(49G) | 0.9800    |
| C(501)-H(50A) | 0.9800    | C(492)-H(49H) | 0.9800    |
| C(501)-H(50B) | 0.9800    | C(492)-H(49I) | 0.9800    |
| C(501)-H(50C) | 0.9800    | C(502)-C(522) | 1.527(8)  |
| C(511)-H(51A) | 0.9800    | C(502)-C(512) | 1.534(8)  |
| C(511)-H(51B) | 0.9800    | C(502)-H(50G) | 1.0000    |
| C(511)-H(51C) | 0.9800    | C(512)-H(51G) | 0.9800    |
| C(45")-C(49") | 1.514(14) | C(512)-H(51H) | 0.9800    |
| C(45")-C(51") | 1.536(15) | C(512)-H(51I) | 0.9800    |
| C(45")-C(50") | 1.566(14) | C(522)-H(52B) | 0.9800    |
| C(49")-H(49D) | 0.9800    | C(522)-H(52C) | 0.9800    |
| C(49")-H(49E) | 0.9800    | C(522)-H(52D) | 0.9800    |
| C(49")-H(49F) | 0.9800    | C(413)-C(423) | 1.407(8)  |
| C(50")-H(50D) | 0.9800    | C(413)-C(463) | 1.410(7)  |
| C(50")-H(50E) | 0.9800    | C(423)-C(433) | 1.405(8)  |
| C(50")-H(50F) | 0.9800    | C(423)-C(47') | 1.518(12) |
| C(51")-H(51D) | 0.9800    | C(423)-C(473) | 1.519(8)  |
| C(51")-H(51E) | 0.9800    | C(433)-C(443) | 1.356(9)  |
| C(51")-H(51F) | 0.9800    | C(433)-H(43D) | 0.9500    |
| C(412)-C(462) | 1.399(7)  | C(443)-C(453) | 1.385(9)  |
| C(412)-C(422) | 1.423(7)  | C(443)-H(44B) | 0.9500    |
| C(422)-C(432) | 1.378(8)  | C(453)-C(463) | 1.384(8)  |
| C(422)-C(472) | 1.513(7)  | C(453)-H(45C) | 0.9500    |
| C(432)-C(442) | 1.360(8)  | C(463)-C(503) | 1.517(8)  |
| C(432)-H(43C) | 0.9500    | C(473)-C(483) | 1.525(10) |
| C(442)-C(452) | 1.379(8)  | C(473)-C(493) | 1.536(10) |
| C(442)-H(44A) | 0.9500    | C(473)-H(47E) | 1.0000    |
| C(452)-C(462) | 1.381(8)  | C(483)-H(48G) | 0.9800    |
| C(452)-H(45B) | 0.9500    | C(483)-H(48H) | 0.9800    |
| C(462)-C(502) | 1.521(8)  | C(483)-H(48I) | 0.9800    |
| C(472)-C(482) | 1.523(8)  | C(493)-H(49J) | 0.9800    |
| C(472)-C(492) | 1.524(8)  | C(493)-H(49K) | 0.9800    |
| C(472)-H(47D) | 1.0000    | C(493)-H(49L) | 0.9800    |
| C(482)-H(48D) | 0.9800    | C(47')-C(48') | 1.52(2)   |
| C(482)-H(48E) | 0.9800    | C(47')-C(49') | 1.527(19) |

|               |          |               |          |
|---------------|----------|---------------|----------|
| C(47')-H(47F) | 1.0000   | C(474)-H(47I) | 0.9800   |
| C(48')-H(48J) | 0.9800   | C(484)-H(48M) | 0.9800   |
| C(48')-H(48K) | 0.9800   | C(484)-H(48N) | 0.9800   |
| C(48')-H(48L) | 0.9800   | C(484)-H(48O) | 0.9800   |
| C(49')-H(49M) | 0.9800   | C(494)-H(49P) | 0.9800   |
| C(49')-H(49N) | 0.9800   | C(494)-H(49Q) | 0.9800   |
| C(49')-H(49O) | 0.9800   | C(494)-H(49R) | 0.9800   |
| C(503)-C(523) | 1.517(9) | C(504)-H(50I) | 0.9800   |
| C(503)-C(513) | 1.557(9) | C(504)-H(50J) | 0.9800   |
| C(503)-H(50H) | 1.0000   | C(504)-H(50K) | 0.9800   |
| C(513)-H(51J) | 0.9800   | C(514)-H(51P) | 0.9800   |
| C(513)-H(51K) | 0.9800   | C(514)-H(51Q) | 0.9800   |
| C(513)-H(51L) | 0.9800   | C(514)-H(51R) | 0.9800   |
| C(523)-H(52E) | 0.9800   | C(415)-C(465) | 1.400(8) |
| C(523)-H(52F) | 0.9800   | C(415)-C(425) | 1.406(8) |
| C(523)-H(52G) | 0.9800   | C(415)-N(424) | 1.447(7) |
| C(51Z)-H(51M) | 0.9800   | C(425)-C(435) | 1.377(8) |
| C(51Z)-H(51N) | 0.9800   | C(425)-C(475) | 1.510(8) |
| C(51Z)-H(51O) | 0.9800   | C(435)-C(445) | 1.363(9) |
| C(414)-C(484) | 1.531(8) | C(435)-H(43F) | 0.9500   |
| C(414)-C(464) | 1.533(8) | C(445)-C(455) | 1.369(9) |
| C(414)-C(474) | 1.547(8) | C(445)-H(44C) | 0.9500   |
| C(414)-C(424) | 1.578(7) | C(455)-C(465) | 1.395(8) |
| C(424)-N(424) | 1.330(7) | C(455)-H(45D) | 0.9500   |
| C(424)-C(434) | 1.413(7) | C(465)-C(505) | 1.504(8) |
| C(434)-C(444) | 1.384(7) | C(475)-C(485) | 1.522(8) |
| C(434)-H(43E) | 0.9500   | C(475)-C(495) | 1.535(8) |
| C(444)-C(454) | 1.589(8) | C(475)-H(47J) | 1.0000   |
| C(454)-C(494) | 1.537(8) | C(485)-H(48P) | 0.9800   |
| C(454)-C(514) | 1.537(7) | C(485)-H(48Q) | 0.9800   |
| C(454)-C(504) | 1.546(7) | C(485)-H(48R) | 0.9800   |
| C(464)-H(46E) | 0.9800   | C(495)-H(49S) | 0.9800   |
| C(464)-H(46F) | 0.9800   | C(495)-H(49T) | 0.9800   |
| C(464)-H(46G) | 0.9800   | C(495)-H(49U) | 0.9800   |
| C(474)-H(47G) | 0.9800   | C(505)-C(515) | 1.524(8) |
| C(474)-H(47H) | 0.9800   | C(505)-C(525) | 1.534(8) |

|               |          |               |           |
|---------------|----------|---------------|-----------|
| C(505)-H(50L) | 1.0000   | C(17)-C(27)   | 1.509(9)  |
| C(515)-H(51S) | 0.9800   | C(17)-H(17A)  | 0.9800    |
| C(515)-H(51T) | 0.9800   | C(17)-H(17B)  | 0.9800    |
| C(515)-H(51U) | 0.9800   | C(17)-H(17C)  | 0.9800    |
| C(525)-H(52K) | 0.9800   | C(27)-C(37)   | 1.3900    |
| C(525)-H(52L) | 0.9800   | C(27)-C(77)   | 1.3900    |
| C(525)-H(52M) | 0.9800   | C(37)-C(47)   | 1.3900    |
| C(416)-C(426) | 1.407(7) | C(37)-H(37A)  | 0.9500    |
| C(416)-C(466) | 1.416(8) | C(47)-C(57)   | 1.3900    |
| C(426)-C(436) | 1.399(7) | C(47)-H(47N)  | 0.9500    |
| C(426)-C(476) | 1.519(8) | C(57)-C(67)   | 1.3900    |
| C(436)-C(446) | 1.376(8) | C(57)-H(57A)  | 0.9500    |
| C(436)-H(43G) | 0.9500   | C(67)-C(77)   | 1.3900    |
| C(446)-C(456) | 1.372(8) | C(67)-H(67A)  | 0.9500    |
| C(446)-H(44D) | 0.9500   | C(77)-H(77A)  | 0.9500    |
| C(456)-C(466) | 1.394(8) | C(87)-C(97)   | 1.526(9)  |
| C(456)-H(45E) | 0.9500   | C(87)-H(87A)  | 0.9800    |
| C(466)-C(506) | 1.525(8) | C(87)-H(87B)  | 0.9800    |
| C(476)-C(486) | 1.517(8) | C(87)-H(87C)  | 0.9800    |
| C(476)-C(496) | 1.545(8) | C(97)-C(107)  | 1.3900    |
| C(476)-H(47K) | 1.0000   | C(97)-C(147)  | 1.3900    |
| C(486)-H(48S) | 0.9800   | C(107)-C(117) | 1.3900    |
| C(486)-H(48T) | 0.9800   | C(107)-H(107) | 0.9500    |
| C(486)-H(48U) | 0.9800   | C(117)-C(127) | 1.3900    |
| C(496)-H(49V) | 0.9800   | C(117)-H(117) | 0.9500    |
| C(496)-H(49W) | 0.9800   | C(127)-C(137) | 1.3900    |
| C(496)-H(49X) | 0.9800   | C(127)-H(127) | 0.9500    |
| C(506)-C(526) | 1.525(8) | C(137)-C(147) | 1.3900    |
| C(506)-C(516) | 1.526(8) | C(137)-H(137) | 0.9500    |
| C(506)-H(50M) | 1.0000   | C(147)-H(147) | 0.9500    |
| C(516)-H(51V) | 0.9800   | C(157)-C(167) | 1.465(13) |
| C(516)-H(51W) | 0.9800   | C(157)-H(15A) | 0.9800    |
| C(516)-H(51X) | 0.9800   | C(157)-H(15B) | 0.9800    |
| C(526)-H(52N) | 0.9800   | C(157)-H(15C) | 0.9800    |
| C(526)-H(52O) | 0.9800   | C(167)-C(177) | 1.3900    |
| C(526)-H(52P) | 0.9800   | C(167)-C(217) | 1.3900    |

|               |           |                   |            |
|---------------|-----------|-------------------|------------|
| C(177)-C(187) | 1.3900    | C(277)-C(287)     | 1.3900     |
| C(177)-H(17D) | 0.9500    | C(277)-H(277)     | 0.9500     |
| C(187)-C(197) | 1.3900    | C(287)-H(287)     | 0.9500     |
| C(187)-H(18A) | 0.9500    | C(22')-C(23')     | 1.519(14)  |
| C(197)-C(207) | 1.3900    | C(22')-H(22D)     | 0.9800     |
| C(197)-H(19A) | 0.9500    | C(22')-H(22E)     | 0.9800     |
| C(207)-C(217) | 1.3900    | C(22')-H(22F)     | 0.9800     |
| C(207)-H(20A) | 0.9500    | C(23')-C(24')     | 1.3900     |
| C(217)-H(21A) | 0.9500    | C(23')-C(28')     | 1.3900     |
| C(15')-C(16') | 1.474(19) | C(24')-C(25')     | 1.3900     |
| C(15')-H(15D) | 0.9800    | C(24')-H(24')     | 0.9500     |
| C(15')-H(15E) | 0.9800    | C(25')-C(26')     | 1.3900     |
| C(15')-H(15F) | 0.9800    | C(25')-H(25')     | 0.9500     |
| C(16')-C(17') | 1.3900    | C(26')-C(27')     | 1.3900     |
| C(16')-C(21') | 1.3900    | C(26')-H(26')     | 0.9500     |
| C(17')-C(18') | 1.3900    | C(27')-C(28')     | 1.3900     |
| C(17')-H(17E) | 0.9500    | C(27')-H(27')     | 0.9500     |
| C(18')-C(19') | 1.3900    | C(28')-H(28')     | 0.9500     |
| C(18')-H(18B) | 0.9500    | N(11)-Co(1)-N(21) | 96.53(18)  |
| C(19')-C(20') | 1.3900    | N(11)-Co(1)-Co(2) | 129.27(13) |
| C(19')-H(19B) | 0.9500    | N(21)-Co(1)-Co(2) | 134.17(13) |
| C(20')-C(21') | 1.3900    | N(11)-Co(1)-H(1)  | 121.9(17)  |
| C(20')-H(20B) | 0.9500    | N(21)-Co(1)-H(1)  | 125.7(17)  |
| C(21')-H(21B) | 0.9500    | Co(2)-Co(1)-H(1)  | 34.5(17)   |
| C(227)-C(237) | 1.516(12) | N(11)-Co(1)-H(2)  | 124.7(18)  |
| C(227)-H(22A) | 0.9800    | N(21)-Co(1)-H(2)  | 119.4(18)  |
| C(227)-H(22B) | 0.9800    | Co(2)-Co(1)-H(2)  | 36.2(18)   |
| C(227)-H(22C) | 0.9800    | H(1)-Co(1)-H(2)   | 70(2)      |
| C(237)-C(247) | 1.3900    | N(24)-Co(2)-N(14) | 95.32(18)  |
| C(237)-C(287) | 1.3900    | N(24)-Co(2)-Co(1) | 130.89(13) |
| C(247)-C(257) | 1.3900    | N(14)-Co(2)-Co(1) | 133.12(13) |
| C(247)-H(247) | 0.9500    | N(24)-Co(2)-H(1)  | 170(2)     |
| C(257)-C(267) | 1.3900    | N(14)-Co(2)-H(1)  | 89(2)      |
| C(257)-H(257) | 0.9500    | Co(1)-Co(2)-H(1)  | 44(2)      |
| C(267)-C(277) | 1.3900    | N(24)-Co(2)-H(2)  | 94.1(19)   |
| C(267)-H(267) | 0.9500    | N(14)-Co(2)-H(2)  | 170.1(19)  |



|                     |          |                      |          |
|---------------------|----------|----------------------|----------|
| Co(1)-Co(2)-H(2)    | 38.2(19) | C(11)-C(61)-H(61B)   | 109.5    |
| H(1)-Co(2)-H(2)     | 82(3)    | H(61A)-C(61)-H(61B)  | 109.5    |
| C(21)-N(11)-C(12)   | 118.7(4) | C(11)-C(61)-H(61C)   | 109.5    |
| C(21)-N(11)-Co(1)   | 115.8(4) | H(61A)-C(61)-H(61C)  | 109.5    |
| C(12)-N(11)-Co(1)   | 125.2(3) | H(61B)-C(61)-H(61C)  | 109.5    |
| C(41)-N(21)-C(13)   | 122.0(5) | C(11)-C(71)-H(71A)   | 109.5    |
| C(41)-N(21)-Co(1)   | 121.0(4) | C(11)-C(71)-H(71B)   | 109.5    |
| C(13)-N(21)-Co(1)   | 116.3(3) | H(71A)-C(71)-H(71B)  | 109.5    |
| C(24)-N(14)-C(15)   | 121.0(4) | C(11)-C(71)-H(71C)   | 109.5    |
| C(24)-N(14)-Co(2)   | 122.6(4) | H(71A)-C(71)-H(71C)  | 109.5    |
| C(15)-N(14)-Co(2)   | 116.4(3) | H(71B)-C(71)-H(71C)  | 109.5    |
| C(44)-N(24)-C(16)   | 120.4(4) | C(11)-C(81)-H(81A)   | 109.5    |
| C(44)-N(24)-Co(2)   | 120.3(3) | C(11)-C(81)-H(81B)   | 109.5    |
| C(16)-N(24)-Co(2)   | 118.6(4) | H(81A)-C(81)-H(81B)  | 109.5    |
| C(71)-C(11)-C(81)   | 106.0(5) | C(11)-C(81)-H(81C)   | 109.5    |
| C(71)-C(11)-C(61)   | 108.0(5) | H(81A)-C(81)-H(81C)  | 109.5    |
| C(81)-C(11)-C(61)   | 108.1(5) | H(81B)-C(81)-H(81C)  | 109.5    |
| C(71)-C(11)-C(21)   | 116.2(5) | C(51)-C(91)-H(91A)   | 109.5    |
| C(81)-C(11)-C(21)   | 108.2(4) | C(51)-C(91)-H(91B)   | 109.5    |
| C(61)-C(11)-C(21)   | 110.1(5) | H(91A)-C(91)-H(91B)  | 109.5    |
| N(11)-C(21)-C(31)   | 122.9(5) | C(51)-C(91)-H(91C)   | 109.5    |
| N(11)-C(21)-C(11)   | 124.6(5) | H(91A)-C(91)-H(91C)  | 109.5    |
| C(31)-C(21)-C(11)   | 112.5(4) | H(91B)-C(91)-H(91C)  | 109.5    |
| C(21)-C(31)-C(41)   | 131.8(5) | C(51)-C(101)-H(10A)  | 109.5    |
| C(21)-C(31)-H(31A)  | 114.1    | C(51)-C(101)-H(10B)  | 109.5    |
| C(41)-C(31)-H(31A)  | 114.1    | H(10A)-C(101)-H(10B) | 109.5    |
| N(21)-C(41)-C(31)   | 120.2(5) | C(51)-C(101)-H(10C)  | 109.5    |
| N(21)-C(41)-C(51)   | 126.9(5) | H(10A)-C(101)-H(10C) | 109.5    |
| C(31)-C(41)-C(51)   | 112.8(5) | H(10B)-C(101)-H(10C) | 109.5    |
| C(101)-C(51)-C(91)  | 106.1(5) | C(51)-C(111)-H(11A)  | 109.5    |
| C(101)-C(51)-C(111) | 108.6(5) | C(51)-C(111)-H(11B)  | 109.5    |
| C(91)-C(51)-C(111)  | 106.6(5) | H(11A)-C(111)-H(11B) | 109.5    |
| C(101)-C(51)-C(41)  | 110.5(5) | C(51)-C(111)-H(11C)  | 109.5    |
| C(91)-C(51)-C(41)   | 119.3(5) | H(11A)-C(111)-H(11C) | 109.5    |
| C(111)-C(51)-C(41)  | 105.3(5) | H(11B)-C(111)-H(11C) | 109.5    |
| C(11)-C(61)-H(61A)  | 109.5    | C(22)-C(12)-C(62)    | 119.6(5) |

|                     |          |                      |          |
|---------------------|----------|----------------------|----------|
| C(22)-C(12)-N(11)   | 121.4(5) | C(62)-C(102)-C(122)  | 115.0(5) |
| C(62)-C(12)-N(11)   | 119.0(5) | C(112)-C(102)-C(122) | 108.5(5) |
| C(32)-C(22)-C(12)   | 119.2(5) | C(62)-C(102)-H(10D)  | 108.2    |
| C(32)-C(22)-C(72)   | 118.6(5) | C(112)-C(102)-H(10D) | 108.2    |
| C(12)-C(22)-C(72)   | 122.2(5) | C(122)-C(102)-H(10D) | 108.2    |
| C(42)-C(32)-C(22)   | 121.5(6) | C(102)-C(112)-H(11D) | 109.5    |
| C(42)-C(32)-H(32A)  | 119.3    | C(102)-C(112)-H(11E) | 109.5    |
| C(22)-C(32)-H(32A)  | 119.3    | H(11D)-C(112)-H(11E) | 109.5    |
| C(32)-C(42)-C(52)   | 119.2(6) | C(102)-C(112)-H(11F) | 109.5    |
| C(32)-C(42)-H(42A)  | 120.4    | H(11D)-C(112)-H(11F) | 109.5    |
| C(52)-C(42)-H(42A)  | 120.4    | H(11E)-C(112)-H(11F) | 109.5    |
| C(42)-C(52)-C(62)   | 122.2(5) | C(102)-C(122)-H(12A) | 109.5    |
| C(42)-C(52)-H(52A)  | 118.9    | C(102)-C(122)-H(12B) | 109.5    |
| C(62)-C(52)-H(52A)  | 118.9    | H(12A)-C(122)-H(12B) | 109.5    |
| C(52)-C(62)-C(12)   | 118.1(5) | C(102)-C(122)-H(12C) | 109.5    |
| C(52)-C(62)-C(102)  | 119.5(5) | H(12A)-C(122)-H(12C) | 109.5    |
| C(12)-C(62)-C(102)  | 122.2(5) | H(12B)-C(122)-H(12C) | 109.5    |
| C(22)-C(72)-C(82)   | 109.4(4) | C(63)-C(13)-C(23)    | 121.7(5) |
| C(22)-C(72)-C(92)   | 113.8(5) | C(63)-C(13)-N(21)    | 118.0(5) |
| C(82)-C(72)-C(92)   | 109.9(5) | C(23)-C(13)-N(21)    | 120.3(5) |
| C(22)-C(72)-H(72A)  | 107.8    | C(33)-C(23)-C(13)    | 117.5(6) |
| C(82)-C(72)-H(72A)  | 107.8    | C(33)-C(23)-C(73)    | 120.0(5) |
| C(92)-C(72)-H(72A)  | 107.8    | C(13)-C(23)-C(73)    | 122.4(5) |
| C(72)-C(82)-H(82A)  | 109.5    | C(43)-C(33)-C(23)    | 121.2(6) |
| C(72)-C(82)-H(82B)  | 109.5    | C(43)-C(33)-H(33A)   | 119.4    |
| H(82A)-C(82)-H(82B) | 109.5    | C(23)-C(33)-H(33A)   | 119.4    |
| C(72)-C(82)-H(82C)  | 109.5    | C(53)-C(43)-C(33)    | 120.1(6) |
| H(82A)-C(82)-H(82C) | 109.5    | C(53)-C(43)-H(43A)   | 119.9    |
| H(82B)-C(82)-H(82C) | 109.5    | C(33)-C(43)-H(43A)   | 119.9    |
| C(72)-C(92)-H(92A)  | 109.5    | C(43)-C(53)-C(63)    | 121.4(6) |
| C(72)-C(92)-H(92B)  | 109.5    | C(43)-C(53)-H(53A)   | 119.3    |
| H(92A)-C(92)-H(92B) | 109.5    | C(63)-C(53)-H(53A)   | 119.3    |
| C(72)-C(92)-H(92C)  | 109.5    | C(53)-C(63)-C(13)    | 117.9(6) |
| H(92A)-C(92)-H(92C) | 109.5    | C(53)-C(63)-C(103)   | 119.4(6) |
| H(92B)-C(92)-H(92C) | 109.5    | C(13)-C(63)-C(103)   | 122.7(5) |
| C(62)-C(102)-C(112) | 108.5(5) | C(23)-C(73)-C(93)    | 110.4(5) |

|                      |          |                     |          |
|----------------------|----------|---------------------|----------|
| C(23)-C(73)-C(83)    | 113.5(5) | C(64)-C(14)-C(74)   | 107.0(5) |
| C(93)-C(73)-C(83)    | 109.4(5) | C(84)-C(14)-C(74)   | 109.8(5) |
| C(23)-C(73)-H(73A)   | 107.8    | C(64)-C(14)-C(24)   | 120.0(5) |
| C(93)-C(73)-H(73A)   | 107.8    | C(84)-C(14)-C(24)   | 107.6(5) |
| C(83)-C(73)-H(73A)   | 107.8    | C(74)-C(14)-C(24)   | 107.8(5) |
| C(73)-C(83)-H(83A)   | 109.5    | N(14)-C(24)-C(34)   | 120.9(5) |
| C(73)-C(83)-H(83B)   | 109.5    | N(14)-C(24)-C(14)   | 127.3(5) |
| H(83A)-C(83)-H(83B)  | 109.5    | C(34)-C(24)-C(14)   | 111.8(5) |
| C(73)-C(83)-H(83C)   | 109.5    | C(44)-C(34)-C(24)   | 130.6(5) |
| H(83A)-C(83)-H(83C)  | 109.5    | C(44)-C(34)-H(34A)  | 114.7    |
| H(83B)-C(83)-H(83C)  | 109.5    | C(24)-C(34)-H(34A)  | 114.7    |
| C(73)-C(93)-H(93A)   | 109.5    | N(24)-C(44)-C(34)   | 121.6(5) |
| C(73)-C(93)-H(93B)   | 109.5    | N(24)-C(44)-C(54)   | 125.0(5) |
| H(93A)-C(93)-H(93B)  | 109.5    | C(34)-C(44)-C(54)   | 113.2(5) |
| C(73)-C(93)-H(93C)   | 109.5    | C(104)-C(54)-C(94)  | 107.4(5) |
| H(93A)-C(93)-H(93C)  | 109.5    | C(104)-C(54)-C(114) | 105.6(5) |
| H(93B)-C(93)-H(93C)  | 109.5    | C(94)-C(54)-C(114)  | 107.5(5) |
| C(63)-C(103)-C(123)  | 110.0(5) | C(104)-C(54)-C(44)  | 113.1(5) |
| C(63)-C(103)-C(113)  | 114.1(5) | C(94)-C(54)-C(44)   | 105.0(4) |
| C(123)-C(103)-C(113) | 109.0(5) | C(114)-C(54)-C(44)  | 117.7(5) |
| C(63)-C(103)-H(10E)  | 107.9    | C(14)-C(64)-H(64A)  | 109.5    |
| C(123)-C(103)-H(10E) | 107.9    | C(14)-C(64)-H(64B)  | 109.5    |
| C(113)-C(103)-H(10E) | 107.9    | H(64A)-C(64)-H(64B) | 109.5    |
| C(103)-C(113)-H(11G) | 109.5    | C(14)-C(64)-H(64C)  | 109.5    |
| C(103)-C(113)-H(11H) | 109.5    | H(64A)-C(64)-H(64C) | 109.5    |
| H(11G)-C(113)-H(11H) | 109.5    | H(64B)-C(64)-H(64C) | 109.5    |
| C(103)-C(113)-H(11I) | 109.5    | C(14)-C(74)-H(74A)  | 109.5    |
| H(11G)-C(113)-H(11I) | 109.5    | C(14)-C(74)-H(74B)  | 109.5    |
| H(11H)-C(113)-H(11I) | 109.5    | H(74A)-C(74)-H(74B) | 109.5    |
| C(103)-C(123)-H(12D) | 109.5    | C(14)-C(74)-H(74C)  | 109.5    |
| C(103)-C(123)-H(12E) | 109.5    | H(74A)-C(74)-H(74C) | 109.5    |
| H(12D)-C(123)-H(12E) | 109.5    | H(74B)-C(74)-H(74C) | 109.5    |
| C(103)-C(123)-H(12F) | 109.5    | C(14)-C(84)-H(84A)  | 109.5    |
| H(12D)-C(123)-H(12F) | 109.5    | C(14)-C(84)-H(84B)  | 109.5    |
| H(12E)-C(123)-H(12F) | 109.5    | H(84A)-C(84)-H(84B) | 109.5    |
| C(64)-C(14)-C(84)    | 104.4(5) | C(14)-C(84)-H(84C)  | 109.5    |

|                      |          |                      |          |
|----------------------|----------|----------------------|----------|
| H(84A)-C(84)-H(84C)  | 109.5    | C(15)-C(65)-C(105)   | 123.8(5) |
| H(84B)-C(84)-H(84C)  | 109.5    | C(55)-C(65)-C(105)   | 117.7(5) |
| C(54)-C(94)-H(94A)   | 109.5    | C(25)-C(75)-C(95)    | 114.2(5) |
| C(54)-C(94)-H(94B)   | 109.5    | C(25)-C(75)-C(85)    | 109.5(5) |
| H(94A)-C(94)-H(94B)  | 109.5    | C(95)-C(75)-C(85)    | 110.0(5) |
| C(54)-C(94)-H(94C)   | 109.5    | C(25)-C(75)-H(75A)   | 107.6    |
| H(94A)-C(94)-H(94C)  | 109.5    | C(95)-C(75)-H(75A)   | 107.6    |
| H(94B)-C(94)-H(94C)  | 109.5    | C(85)-C(75)-H(75A)   | 107.6    |
| C(54)-C(104)-H(10F)  | 109.5    | C(75)-C(85)-H(85A)   | 109.5    |
| C(54)-C(104)-H(10G)  | 109.5    | C(75)-C(85)-H(85B)   | 109.5    |
| H(10F)-C(104)-H(10G) | 109.5    | H(85A)-C(85)-H(85B)  | 109.5    |
| C(54)-C(104)-H(10H)  | 109.5    | C(75)-C(85)-H(85C)   | 109.5    |
| H(10F)-C(104)-H(10H) | 109.5    | H(85A)-C(85)-H(85C)  | 109.5    |
| H(10G)-C(104)-H(10H) | 109.5    | H(85B)-C(85)-H(85C)  | 109.5    |
| C(54)-C(114)-H(11J)  | 109.5    | C(75)-C(95)-H(95A)   | 109.5    |
| C(54)-C(114)-H(11K)  | 109.5    | C(75)-C(95)-H(95B)   | 109.5    |
| H(11J)-C(114)-H(11K) | 109.5    | H(95A)-C(95)-H(95B)  | 109.5    |
| C(54)-C(114)-H(11L)  | 109.5    | C(75)-C(95)-H(95C)   | 109.5    |
| H(11J)-C(114)-H(11L) | 109.5    | H(95A)-C(95)-H(95C)  | 109.5    |
| H(11K)-C(114)-H(11L) | 109.5    | H(95B)-C(95)-H(95C)  | 109.5    |
| C(65)-C(15)-C(25)    | 120.2(5) | C(65)-C(105)-C(125)  | 110.2(5) |
| C(65)-C(15)-N(14)    | 119.8(5) | C(65)-C(105)-C(115)  | 113.4(5) |
| C(25)-C(15)-N(14)    | 120.0(5) | C(125)-C(105)-C(115) | 109.8(5) |
| C(35)-C(25)-C(15)    | 118.6(6) | C(65)-C(105)-H(10I)  | 107.7    |
| C(35)-C(25)-C(75)    | 120.4(5) | C(125)-C(105)-H(10I) | 107.7    |
| C(15)-C(25)-C(75)    | 121.0(5) | C(115)-C(105)-H(10I) | 107.7    |
| C(45)-C(35)-C(25)    | 122.2(6) | C(105)-C(115)-H(11M) | 109.5    |
| C(45)-C(35)-H(35A)   | 118.9    | C(105)-C(115)-H(11N) | 109.5    |
| C(25)-C(35)-H(35A)   | 118.9    | H(11M)-C(115)-H(11N) | 109.5    |
| C(35)-C(45)-C(55)    | 119.9(5) | C(105)-C(115)-H(11O) | 109.5    |
| C(35)-C(45)-H(45A)   | 120.1    | H(11M)-C(115)-H(11O) | 109.5    |
| C(55)-C(45)-H(45A)   | 120.1    | H(11N)-C(115)-H(11O) | 109.5    |
| C(45)-C(55)-C(65)    | 120.7(6) | C(105)-C(125)-H(12G) | 109.5    |
| C(45)-C(55)-H(55A)   | 119.7    | C(105)-C(125)-H(12H) | 109.5    |
| C(65)-C(55)-H(55A)   | 119.7    | H(12G)-C(125)-H(12H) | 109.5    |
| C(15)-C(65)-C(55)    | 118.5(6) | C(105)-C(125)-H(12I) | 109.5    |

|                      |          |                      |            |
|----------------------|----------|----------------------|------------|
| H(12G)-C(125)-H(12I) | 109.5    | H(96A)-C(96)-H(96C)  | 109.5      |
| H(12H)-C(125)-H(12I) | 109.5    | H(96B)-C(96)-H(96C)  | 109.5      |
| C(66)-C(16)-C(26)    | 119.7(5) | C(66)-C(106)-C(126)  | 113.0(5)   |
| C(66)-C(16)-N(24)    | 118.1(5) | C(66)-C(106)-C(116)  | 112.4(5)   |
| C(26)-C(16)-N(24)    | 122.2(5) | C(126)-C(106)-C(116) | 108.0(5)   |
| C(36)-C(26)-C(16)    | 118.8(6) | C(66)-C(106)-H(10J)  | 107.7      |
| C(36)-C(26)-C(76)    | 117.6(5) | C(126)-C(106)-H(10J) | 107.7      |
| C(16)-C(26)-C(76)    | 123.6(5) | C(116)-C(106)-H(10J) | 107.7      |
| C(46)-C(36)-C(26)    | 121.2(6) | C(106)-C(116)-H(11P) | 109.5      |
| C(46)-C(36)-H(36A)   | 119.4    | C(106)-C(116)-H(11Q) | 109.5      |
| C(26)-C(36)-H(36A)   | 119.4    | H(11P)-C(116)-H(11Q) | 109.5      |
| C(56)-C(46)-C(36)    | 120.2(6) | C(106)-C(116)-H(11R) | 109.5      |
| C(56)-C(46)-H(46A)   | 119.9    | H(11P)-C(116)-H(11R) | 109.5      |
| C(36)-C(46)-H(46A)   | 119.9    | H(11Q)-C(116)-H(11R) | 109.5      |
| C(46)-C(56)-C(66)    | 121.0(6) | C(106)-C(126)-H(12J) | 109.5      |
| C(46)-C(56)-H(56A)   | 119.5    | C(106)-C(126)-H(12K) | 109.5      |
| C(66)-C(56)-H(56A)   | 119.5    | H(12J)-C(126)-H(12K) | 109.5      |
| C(56)-C(66)-C(16)    | 119.0(6) | C(106)-C(126)-H(12L) | 109.5      |
| C(56)-C(66)-C(106)   | 118.1(6) | H(12J)-C(126)-H(12L) | 109.5      |
| C(16)-C(66)-C(106)   | 122.9(5) | H(12K)-C(126)-H(12L) | 109.5      |
| C(26)-C(76)-C(96)    | 112.1(5) | N(221)-Co(3)-N(211)  | 95.97(19)  |
| C(26)-C(76)-C(86)    | 111.9(5) | N(221)-Co(3)-Co(4)   | 129.12(14) |
| C(96)-C(76)-C(86)    | 108.9(5) | N(211)-Co(3)-Co(4)   | 134.90(14) |
| C(26)-C(76)-H(76A)   | 107.9    | N(221)-Co(3)-H(3)    | 119.8(18)  |
| C(96)-C(76)-H(76A)   | 107.9    | N(211)-Co(3)-H(3)    | 126.2(18)  |
| C(86)-C(76)-H(76A)   | 107.9    | Co(4)-Co(3)-H(3)     | 34.7(18)   |
| C(76)-C(86)-H(86A)   | 109.5    | N(221)-Co(3)-H(4)    | 135.8(19)  |
| C(76)-C(86)-H(86B)   | 109.5    | N(211)-Co(3)-H(4)    | 111.3(19)  |
| H(86A)-C(86)-H(86B)  | 109.5    | Co(4)-Co(3)-H(4)     | 38.2(19)   |
| C(76)-C(86)-H(86C)   | 109.5    | H(3)-Co(3)-H(4)      | 71(2)      |
| H(86A)-C(86)-H(86C)  | 109.5    | N(224)-Co(4)-N(214)  | 95.44(18)  |
| H(86B)-C(86)-H(86C)  | 109.5    | N(224)-Co(4)-Co(3)   | 131.49(13) |
| C(76)-C(96)-H(96A)   | 109.5    | N(214)-Co(4)-Co(3)   | 132.49(13) |
| C(76)-C(96)-H(96B)   | 109.5    | N(224)-Co(4)-H(3)    | 170(2)     |
| H(96A)-C(96)-H(96B)  | 109.5    | N(214)-Co(4)-H(3)    | 93(2)      |
| C(76)-C(96)-H(96C)   | 109.5    | Co(3)-Co(4)-H(3)     | 40(2)      |

|                      |           |                      |          |
|----------------------|-----------|----------------------|----------|
| N(224)-Co(4)-H(4)    | 98.5(18)  | C(261)-C(211)-C(221) | 110.1(7) |
| N(214)-Co(4)-H(4)    | 162.2(19) | C(281)-C(211)-C(221) | 119.4(6) |
| Co(3)-Co(4)-H(4)     | 37.0(18)  | C(271)-C(211)-C(221) | 106.1(7) |
| H(3)-Co(4)-H(4)      | 75(3)     | C(26")-C(21")-C(27") | 108(2)   |
| C(221)-N(211)-C(212) | 122.5(5)  | C(26")-C(21")-C(221) | 111(2)   |
| C(221)-N(211)-Co(3)  | 121.7(4)  | C(27")-C(21")-C(221) | 105(2)   |
| C(212)-N(211)-Co(3)  | 115.6(3)  | C(21")-C(26")-H(26D) | 109.5    |
| C(241)-N(221)-C(213) | 120.8(5)  | C(21")-C(26")-H(26E) | 109.5    |
| C(241)-N(221)-Co(3)  | 118.1(4)  | H(26D)-C(26")-H(26E) | 109.5    |
| C(213)-N(221)-Co(3)  | 120.8(3)  | C(21")-C(26")-H(26F) | 109.5    |
| C(224)-N(214)-C(215) | 120.6(4)  | H(26D)-C(26")-H(26F) | 109.5    |
| C(224)-N(214)-Co(4)  | 124.1(4)  | H(26E)-C(26")-H(26F) | 109.5    |
| C(215)-N(214)-Co(4)  | 115.2(3)  | C(21")-C(27")-H(27D) | 109.5    |
| C(244)-N(224)-C(216) | 118.7(4)  | C(21")-C(27")-H(27E) | 109.5    |
| C(244)-N(224)-Co(4)  | 120.5(3)  | H(27D)-C(27")-H(27E) | 109.5    |
| C(216)-N(224)-Co(4)  | 119.8(3)  | C(21")-C(27")-H(27F) | 109.5    |
| C(241)-C(231)-C(221) | 132.3(5)  | H(27D)-C(27")-H(27F) | 109.5    |
| C(241)-C(231)-H(23A) | 113.8     | H(27E)-C(27")-H(27F) | 109.5    |
| C(221)-C(231)-H(23A) | 113.8     | C(251)-C(291)-H(29A) | 109.5    |
| N(221)-C(241)-C(231) | 121.2(5)  | C(251)-C(291)-H(29B) | 109.5    |
| N(221)-C(241)-C(251) | 123.5(5)  | H(29A)-C(291)-H(29B) | 109.5    |
| C(231)-C(241)-C(251) | 114.9(5)  | C(251)-C(291)-H(29C) | 109.5    |
| C(311)-C(251)-C(291) | 108.7(5)  | H(29A)-C(291)-H(29C) | 109.5    |
| C(311)-C(251)-C(301) | 106.3(5)  | H(29B)-C(291)-H(29C) | 109.5    |
| C(291)-C(251)-C(301) | 107.1(5)  | C(251)-C(301)-H(30A) | 109.5    |
| C(311)-C(251)-C(241) | 118.7(5)  | C(251)-C(301)-H(30B) | 109.5    |
| C(291)-C(251)-C(241) | 104.8(5)  | H(30A)-C(301)-H(30B) | 109.5    |
| C(301)-C(251)-C(241) | 110.7(5)  | C(251)-C(301)-H(30C) | 109.5    |
| N(211)-C(221)-C(231) | 119.9(5)  | H(30A)-C(301)-H(30C) | 109.5    |
| N(211)-C(221)-C(211) | 127.5(6)  | H(30B)-C(301)-H(30C) | 109.5    |
| C(231)-C(221)-C(211) | 112.5(5)  | C(251)-C(311)-H(31B) | 109.5    |
| N(211)-C(221)-C(21") | 127.2(9)  | C(251)-C(311)-H(31C) | 109.5    |
| C(231)-C(221)-C(21") | 112.7(9)  | H(31B)-C(311)-H(31C) | 109.5    |
| C(261)-C(211)-C(281) | 106.9(7)  | C(251)-C(311)-H(31D) | 109.5    |
| C(261)-C(211)-C(271) | 108.3(7)  | H(31B)-C(311)-H(31D) | 109.5    |
| C(281)-C(211)-C(271) | 105.6(7)  | H(31C)-C(311)-H(31D) | 109.5    |

|                      |          |                      |          |
|----------------------|----------|----------------------|----------|
| C(262)-C(212)-C(222) | 119.6(6) | C(312)-C(302)-C(262) | 110.0(5) |
| C(262)-C(212)-N(211) | 118.4(5) | C(312)-C(302)-C(322) | 109.0(5) |
| C(222)-C(212)-N(211) | 122.0(6) | C(262)-C(302)-C(322) | 113.0(5) |
| C(232)-C(222)-C(212) | 119.3(6) | C(312)-C(302)-H(30D) | 108.2    |
| C(232)-C(222)-C(272) | 120.2(5) | C(262)-C(302)-H(30D) | 108.2    |
| C(212)-C(222)-C(272) | 120.6(5) | C(322)-C(302)-H(30D) | 108.2    |
| C(222)-C(232)-C(242) | 120.8(6) | C(302)-C(312)-H(31E) | 109.5    |
| C(222)-C(232)-H(23B) | 119.6    | C(302)-C(312)-H(31F) | 109.5    |
| C(242)-C(232)-H(23B) | 119.6    | H(31E)-C(312)-H(31F) | 109.5    |
| C(252)-C(242)-C(232) | 120.0(6) | C(302)-C(312)-H(31G) | 109.5    |
| C(252)-C(242)-H(24A) | 120.0    | H(31E)-C(312)-H(31G) | 109.5    |
| C(232)-C(242)-H(24A) | 120.0    | H(31F)-C(312)-H(31G) | 109.5    |
| C(262)-C(252)-C(242) | 120.6(6) | C(302)-C(322)-H(32B) | 109.5    |
| C(262)-C(252)-H(25A) | 119.7    | C(302)-C(322)-H(32C) | 109.5    |
| C(242)-C(252)-H(25A) | 119.7    | H(32B)-C(322)-H(32C) | 109.5    |
| C(252)-C(262)-C(212) | 119.7(6) | C(302)-C(322)-H(32D) | 109.5    |
| C(252)-C(262)-C(302) | 118.5(6) | H(32B)-C(322)-H(32D) | 109.5    |
| C(212)-C(262)-C(302) | 121.8(6) | H(32C)-C(322)-H(32D) | 109.5    |
| C(222)-C(272)-C(282) | 109.6(5) | C(223)-C(213)-C(263) | 120.8(5) |
| C(222)-C(272)-C(292) | 112.7(5) | C(223)-C(213)-N(221) | 121.1(5) |
| C(282)-C(272)-C(292) | 109.4(5) | C(263)-C(213)-N(221) | 118.0(5) |
| C(222)-C(272)-H(27G) | 108.3    | C(213)-C(223)-C(233) | 118.6(5) |
| C(282)-C(272)-H(27G) | 108.3    | C(213)-C(223)-C(273) | 123.2(5) |
| C(292)-C(272)-H(27G) | 108.3    | C(233)-C(223)-C(273) | 118.3(5) |
| C(272)-C(282)-H(28G) | 109.5    | C(243)-C(233)-C(223) | 121.8(6) |
| C(272)-C(282)-H(28H) | 109.5    | C(243)-C(233)-H(23C) | 119.1    |
| H(28G)-C(282)-H(28H) | 109.5    | C(223)-C(233)-H(23C) | 119.1    |
| C(272)-C(282)-H(28I) | 109.5    | C(233)-C(243)-C(253) | 119.1(6) |
| H(28G)-C(282)-H(28I) | 109.5    | C(233)-C(243)-H(24B) | 120.4    |
| H(28H)-C(282)-H(28I) | 109.5    | C(253)-C(243)-H(24B) | 120.4    |
| C(272)-C(292)-H(29D) | 109.5    | C(243)-C(253)-C(263) | 121.3(6) |
| C(272)-C(292)-H(29E) | 109.5    | C(243)-C(253)-H(25B) | 119.4    |
| H(29D)-C(292)-H(29E) | 109.5    | C(263)-C(253)-H(25B) | 119.4    |
| C(272)-C(292)-H(29F) | 109.5    | C(253)-C(263)-C(213) | 118.2(6) |
| H(29D)-C(292)-H(29F) | 109.5    | C(253)-C(263)-C(303) | 119.2(5) |
| H(29E)-C(292)-H(29F) | 109.5    | C(213)-C(263)-C(303) | 122.6(5) |

|                      |          |                      |          |
|----------------------|----------|----------------------|----------|
| C(223)-C(273)-C(293) | 111.2(5) | C(274)-C(214)-C(264) | 104.8(5) |
| C(223)-C(273)-C(283) | 112.2(5) | C(274)-C(214)-C(284) | 107.8(5) |
| C(293)-C(273)-C(283) | 109.9(5) | C(264)-C(214)-C(284) | 107.5(5) |
| C(223)-C(273)-H(27H) | 107.8    | C(274)-C(214)-C(224) | 111.1(5) |
| C(293)-C(273)-H(27H) | 107.8    | C(264)-C(214)-C(224) | 119.3(5) |
| C(283)-C(273)-H(27H) | 107.8    | C(284)-C(214)-C(224) | 105.8(5) |
| C(273)-C(283)-H(28J) | 109.5    | N(214)-C(224)-C(234) | 119.7(5) |
| C(273)-C(283)-H(28K) | 109.5    | N(214)-C(224)-C(214) | 127.8(5) |
| H(28J)-C(283)-H(28K) | 109.5    | C(234)-C(224)-C(214) | 112.3(5) |
| C(273)-C(283)-H(28L) | 109.5    | C(244)-C(234)-C(224) | 131.9(5) |
| H(28J)-C(283)-H(28L) | 109.5    | C(244)-C(234)-H(23D) | 114.1    |
| H(28K)-C(283)-H(28L) | 109.5    | C(224)-C(234)-H(23D) | 114.1    |
| C(273)-C(293)-H(29G) | 109.5    | N(224)-C(244)-C(234) | 121.4(5) |
| C(273)-C(293)-H(29H) | 109.5    | N(224)-C(244)-C(254) | 124.0(5) |
| H(29G)-C(293)-H(29H) | 109.5    | C(234)-C(244)-C(254) | 114.2(5) |
| C(273)-C(293)-H(29I) | 109.5    | C(304)-C(254)-C(314) | 106.5(5) |
| H(29G)-C(293)-H(29I) | 109.5    | C(304)-C(254)-C(294) | 108.3(5) |
| H(29H)-C(293)-H(29I) | 109.5    | C(314)-C(254)-C(294) | 105.3(5) |
| C(313)-C(303)-C(263) | 111.7(6) | C(304)-C(254)-C(244) | 105.8(5) |
| C(313)-C(303)-C(323) | 109.3(5) | C(314)-C(254)-C(244) | 112.4(5) |
| C(263)-C(303)-C(323) | 112.5(6) | C(294)-C(254)-C(244) | 118.1(5) |
| C(313)-C(303)-H(30E) | 107.8    | C(214)-C(264)-H(26H) | 109.5    |
| C(263)-C(303)-H(30E) | 107.8    | C(214)-C(264)-H(26I) | 109.5    |
| C(323)-C(303)-H(30E) | 107.8    | H(26H)-C(264)-H(26I) | 109.5    |
| C(303)-C(313)-H(31H) | 109.5    | C(214)-C(264)-H(26J) | 109.5    |
| C(303)-C(313)-H(31I) | 109.5    | H(26H)-C(264)-H(26J) | 109.5    |
| H(31H)-C(313)-H(31I) | 109.5    | H(26I)-C(264)-H(26J) | 109.5    |
| C(303)-C(313)-H(31J) | 109.5    | C(214)-C(274)-H(27I) | 109.5    |
| H(31H)-C(313)-H(31J) | 109.5    | C(214)-C(274)-H(27J) | 109.5    |
| H(31I)-C(313)-H(31J) | 109.5    | H(27I)-C(274)-H(27J) | 109.5    |
| C(303)-C(323)-H(32E) | 109.5    | C(214)-C(274)-H(27L) | 109.5    |
| C(303)-C(323)-H(32F) | 109.5    | H(27I)-C(274)-H(27L) | 109.5    |
| H(32E)-C(323)-H(32F) | 109.5    | H(27J)-C(274)-H(27L) | 109.5    |
| C(303)-C(323)-H(32G) | 109.5    | C(214)-C(284)-H(28M) | 109.5    |
| H(32E)-C(323)-H(32G) | 109.5    | C(214)-C(284)-H(28N) | 109.5    |
| H(32F)-C(323)-H(32G) | 109.5    | H(28M)-C(284)-H(28N) | 109.5    |



|                      |          |                      |          |
|----------------------|----------|----------------------|----------|
| C(214)-C(284)-H(28O) | 109.5    | C(255)-C(265)-C(215) | 117.3(6) |
| H(28M)-C(284)-H(28O) | 109.5    | C(255)-C(265)-C(305) | 120.3(6) |
| H(28N)-C(284)-H(28O) | 109.5    | C(215)-C(265)-C(305) | 122.4(5) |
| C(254)-C(294)-H(29J) | 109.5    | C(225)-C(275)-C(285) | 109.3(5) |
| C(254)-C(294)-H(29K) | 109.5    | C(225)-C(275)-C(295) | 112.6(5) |
| H(29J)-C(294)-H(29K) | 109.5    | C(285)-C(275)-C(295) | 110.1(5) |
| C(254)-C(294)-H(29L) | 109.5    | C(225)-C(275)-H(27M) | 108.2    |
| H(29J)-C(294)-H(29L) | 109.5    | C(285)-C(275)-H(27M) | 108.2    |
| H(29K)-C(294)-H(29L) | 109.5    | C(295)-C(275)-H(27M) | 108.2    |
| C(254)-C(304)-H(30F) | 109.5    | C(275)-C(285)-H(28P) | 109.5    |
| C(254)-C(304)-H(30G) | 109.5    | C(275)-C(285)-H(28Q) | 109.5    |
| H(30F)-C(304)-H(30G) | 109.5    | H(28P)-C(285)-H(28Q) | 109.5    |
| C(254)-C(304)-H(30H) | 109.5    | C(275)-C(285)-H(28R) | 109.5    |
| H(30F)-C(304)-H(30H) | 109.5    | H(28P)-C(285)-H(28R) | 109.5    |
| H(30G)-C(304)-H(30H) | 109.5    | H(28Q)-C(285)-H(28R) | 109.5    |
| C(254)-C(314)-H(31K) | 109.5    | C(275)-C(295)-H(29M) | 109.5    |
| C(254)-C(314)-H(31L) | 109.5    | C(275)-C(295)-H(29N) | 109.5    |
| H(31K)-C(314)-H(31L) | 109.5    | H(29M)-C(295)-H(29N) | 109.5    |
| C(254)-C(314)-H(31M) | 109.5    | C(275)-C(295)-H(29O) | 109.5    |
| H(31K)-C(314)-H(31M) | 109.5    | H(29M)-C(295)-H(29O) | 109.5    |
| H(31L)-C(314)-H(31M) | 109.5    | H(29N)-C(295)-H(29O) | 109.5    |
| C(225)-C(215)-C(265) | 121.7(5) | C(315)-C(305)-C(265) | 113.1(5) |
| C(225)-C(215)-N(214) | 119.1(5) | C(315)-C(305)-C(325) | 108.4(5) |
| C(265)-C(215)-N(214) | 119.2(5) | C(265)-C(305)-C(325) | 115.3(5) |
| C(235)-C(225)-C(215) | 117.8(6) | C(315)-C(305)-H(30I) | 106.5    |
| C(235)-C(225)-C(275) | 119.7(5) | C(265)-C(305)-H(30I) | 106.5    |
| C(215)-C(225)-C(275) | 122.5(5) | C(325)-C(305)-H(30I) | 106.5    |
| C(245)-C(235)-C(225) | 120.8(6) | C(305)-C(315)-H(31N) | 109.5    |
| C(245)-C(235)-H(23E) | 119.6    | C(305)-C(315)-H(31O) | 109.5    |
| C(225)-C(235)-H(23E) | 119.6    | H(31N)-C(315)-H(31O) | 109.5    |
| C(235)-C(245)-C(255) | 121.1(6) | C(305)-C(315)-H(31P) | 109.5    |
| C(235)-C(245)-H(24C) | 119.4    | H(31N)-C(315)-H(31P) | 109.5    |
| C(255)-C(245)-H(24C) | 119.4    | H(31O)-C(315)-H(31P) | 109.5    |
| C(245)-C(255)-C(265) | 121.0(6) | C(305)-C(325)-H(32H) | 109.5    |
| C(245)-C(255)-H(25C) | 119.5    | C(305)-C(325)-H(32I) | 109.5    |
| C(265)-C(255)-H(25C) | 119.5    | H(32H)-C(325)-H(32I) | 109.5    |

|                      |          |                      |            |
|----------------------|----------|----------------------|------------|
| C(305)-C(325)-H(32J) | 109.5    | C(276)-C(296)-H(29R) | 109.5      |
| H(32H)-C(325)-H(32J) | 109.5    | H(29P)-C(296)-H(29R) | 109.5      |
| H(32I)-C(325)-H(32J) | 109.5    | H(29Q)-C(296)-H(29R) | 109.5      |
| C(226)-C(216)-C(266) | 119.9(5) | C(266)-C(306)-C(316) | 113.2(5)   |
| C(226)-C(216)-N(224) | 122.4(5) | C(266)-C(306)-C(326) | 111.1(5)   |
| C(266)-C(216)-N(224) | 117.7(5) | C(316)-C(306)-C(326) | 108.6(5)   |
| C(236)-C(226)-C(216) | 118.9(5) | C(266)-C(306)-H(30J) | 108.0      |
| C(236)-C(226)-C(276) | 117.3(5) | C(316)-C(306)-H(30J) | 108.0      |
| C(216)-C(226)-C(276) | 123.8(5) | C(326)-C(306)-H(30J) | 108.0      |
| C(246)-C(236)-C(226) | 121.4(5) | C(306)-C(316)-H(31Q) | 109.5      |
| C(246)-C(236)-H(23F) | 119.3    | C(306)-C(316)-H(31R) | 109.5      |
| C(226)-C(236)-H(23F) | 119.3    | H(31Q)-C(316)-H(31R) | 109.5      |
| C(256)-C(246)-C(236) | 119.0(5) | C(306)-C(316)-H(31S) | 109.5      |
| C(256)-C(246)-H(24D) | 120.5    | H(31Q)-C(316)-H(31S) | 109.5      |
| C(236)-C(246)-H(24D) | 120.5    | H(31R)-C(316)-H(31S) | 109.5      |
| C(246)-C(256)-C(266) | 121.6(5) | C(306)-C(326)-H(32K) | 109.5      |
| C(246)-C(256)-H(25D) | 119.2    | C(306)-C(326)-H(32L) | 109.5      |
| C(266)-C(256)-H(25D) | 119.2    | H(32K)-C(326)-H(32L) | 109.5      |
| C(256)-C(266)-C(216) | 119.0(5) | C(306)-C(326)-H(32M) | 109.5      |
| C(256)-C(266)-C(306) | 118.9(5) | H(32K)-C(326)-H(32M) | 109.5      |
| C(216)-C(266)-C(306) | 122.0(5) | H(32L)-C(326)-H(32M) | 109.5      |
| C(226)-C(276)-C(296) | 111.5(5) | N(421)-Co(5)-N(411)  | 96.11(18)  |
| C(226)-C(276)-C(286) | 111.9(5) | N(421)-Co(5)-Co(6)   | 130.68(14) |
| C(296)-C(276)-C(286) | 109.5(5) | N(411)-Co(5)-Co(6)   | 133.18(13) |
| C(226)-C(276)-H(27N) | 107.9    | N(421)-Co(5)-H(5)    | 118.9(19)  |
| C(296)-C(276)-H(27N) | 107.9    | N(411)-Co(5)-H(5)    | 129.1(19)  |
| C(286)-C(276)-H(27N) | 107.9    | Co(6)-Co(5)-H(5)     | 34.7(19)   |
| C(276)-C(286)-H(28T) | 109.5    | N(421)-Co(5)-H(6)    | 141(2)     |
| C(276)-C(286)-H(28U) | 109.5    | N(411)-Co(5)-H(6)    | 110(2)     |
| H(28T)-C(286)-H(28U) | 109.5    | Co(6)-Co(5)-H(6)     | 33(2)      |
| C(276)-C(286)-H(28V) | 109.5    | H(5)-Co(5)-H(6)      | 65(3)      |
| H(28T)-C(286)-H(28V) | 109.5    | N(414)-Co(6)-N(424)  | 95.42(18)  |
| H(28U)-C(286)-H(28V) | 109.5    | N(414)-Co(6)-Co(5)   | 131.61(13) |
| C(276)-C(296)-H(29P) | 109.5    | N(424)-Co(6)-Co(5)   | 132.36(13) |
| C(276)-C(296)-H(29Q) | 109.5    | N(414)-Co(6)-H(5)    | 166(2)     |
| H(29P)-C(296)-H(29Q) | 109.5    | N(424)-Co(6)-H(5)    | 95(2)      |

|                      |          |                      |           |
|----------------------|----------|----------------------|-----------|
| Co(5)-Co(6)-H(5)     | 38(2)    | H(46C)-C(461)-H(46D) | 109.5     |
| N(414)-Co(6)-H(6)    | 106(2)   | C(411)-C(471)-H(47A) | 109.5     |
| N(424)-Co(6)-H(6)    | 155(2)   | C(411)-C(471)-H(47B) | 109.5     |
| Co(5)-Co(6)-H(6)     | 31(2)    | H(47A)-C(471)-H(47B) | 109.5     |
| H(5)-Co(6)-H(6)      | 67(3)    | C(411)-C(471)-H(47C) | 109.5     |
| C(421)-N(411)-C(412) | 122.8(5) | H(47A)-C(471)-H(47C) | 109.5     |
| C(421)-N(411)-Co(5)  | 121.1(4) | H(47B)-C(471)-H(47C) | 109.5     |
| C(412)-N(411)-Co(5)  | 115.9(3) | C(411)-C(481)-H(48A) | 109.5     |
| C(441)-N(421)-C(413) | 118.7(5) | C(411)-C(481)-H(48B) | 109.5     |
| C(441)-N(421)-Co(5)  | 118.0(4) | H(48A)-C(481)-H(48B) | 109.5     |
| C(413)-N(421)-Co(5)  | 123.0(4) | C(411)-C(481)-H(48C) | 109.5     |
| C(444)-N(414)-C(416) | 120.7(4) | H(48A)-C(481)-H(48C) | 109.5     |
| C(444)-N(414)-Co(6)  | 119.2(4) | H(48B)-C(481)-H(48C) | 109.5     |
| C(416)-N(414)-Co(6)  | 119.9(3) | C(491)-C(451)-C(511) | 106.6(13) |
| C(481)-C(411)-C(461) | 107.0(5) | C(491)-C(451)-C(501) | 109.3(14) |
| C(481)-C(411)-C(471) | 109.4(5) | C(511)-C(451)-C(501) | 107.2(12) |
| C(461)-C(411)-C(471) | 104.9(5) | C(491)-C(451)-C(441) | 108(3)    |
| C(481)-C(411)-C(421) | 109.4(5) | C(511)-C(451)-C(441) | 118.8(12) |
| C(461)-C(411)-C(421) | 119.5(5) | C(501)-C(451)-C(441) | 106.8(11) |
| C(471)-C(411)-C(421) | 106.3(5) | C(49")-C(45")-C(51") | 107.1(16) |
| N(411)-C(421)-C(431) | 120.7(5) | C(49")-C(45")-C(50") | 106.8(14) |
| N(411)-C(421)-C(411) | 127.0(5) | C(51")-C(45")-C(50") | 105.3(11) |
| C(431)-C(421)-C(411) | 112.2(5) | C(49")-C(45")-C(441) | 104(3)    |
| C(441)-C(431)-C(421) | 131.9(5) | C(51")-C(45")-C(441) | 117.1(14) |
| C(441)-C(431)-H(43B) | 114.0    | C(50")-C(45")-C(441) | 115.5(12) |
| C(421)-C(431)-H(43B) | 114.0    | C(462)-C(412)-C(422) | 120.5(5)  |
| N(421)-C(441)-C(431) | 121.5(5) | C(462)-C(412)-N(411) | 119.3(5)  |
| N(421)-C(441)-C(451) | 122.2(9) | C(422)-C(412)-N(411) | 120.2(5)  |
| C(431)-C(441)-C(451) | 116.0(9) | C(432)-C(422)-C(412) | 117.6(5)  |
| N(421)-C(441)-C(45") | 128.8(9) | C(432)-C(422)-C(472) | 121.0(5)  |
| C(431)-C(441)-C(45") | 109.6(9) | C(412)-C(422)-C(472) | 121.4(5)  |
| C(411)-C(461)-H(46B) | 109.5    | C(442)-C(432)-C(422) | 122.3(6)  |
| C(411)-C(461)-H(46C) | 109.5    | C(442)-C(432)-H(43C) | 118.8     |
| H(46B)-C(461)-H(46C) | 109.5    | C(422)-C(432)-H(43C) | 118.8     |
| C(411)-C(461)-H(46D) | 109.5    | C(432)-C(442)-C(452) | 119.6(6)  |
| H(46B)-C(461)-H(46D) | 109.5    | C(432)-C(442)-H(44A) | 120.2     |

|                      |          |                      |           |
|----------------------|----------|----------------------|-----------|
| C(452)-C(442)-H(44A) | 120.2    | H(51H)-C(512)-H(51I) | 109.5     |
| C(442)-C(452)-C(462) | 121.4(6) | C(502)-C(522)-H(52B) | 109.5     |
| C(442)-C(452)-H(45B) | 119.3    | C(502)-C(522)-H(52C) | 109.5     |
| C(462)-C(452)-H(45B) | 119.3    | H(52B)-C(522)-H(52C) | 109.5     |
| C(452)-C(462)-C(412) | 118.4(5) | C(502)-C(522)-H(52D) | 109.5     |
| C(452)-C(462)-C(502) | 119.3(5) | H(52B)-C(522)-H(52D) | 109.5     |
| C(412)-C(462)-C(502) | 122.3(5) | H(52C)-C(522)-H(52D) | 109.5     |
| C(422)-C(472)-C(482) | 113.3(5) | C(423)-C(413)-C(463) | 119.6(5)  |
| C(422)-C(472)-C(492) | 109.0(5) | C(423)-C(413)-N(421) | 120.7(5)  |
| C(482)-C(472)-C(492) | 108.8(5) | C(463)-C(413)-N(421) | 119.7(5)  |
| C(422)-C(472)-H(47D) | 108.5    | C(433)-C(423)-C(413) | 119.0(6)  |
| C(482)-C(472)-H(47D) | 108.5    | C(433)-C(423)-C(47') | 115.8(15) |
| C(492)-C(472)-H(47D) | 108.5    | C(413)-C(423)-C(47') | 122.2(15) |
| C(472)-C(482)-H(48D) | 109.5    | C(433)-C(423)-C(473) | 118.2(6)  |
| C(472)-C(482)-H(48E) | 109.5    | C(413)-C(423)-C(473) | 122.7(6)  |
| H(48D)-C(482)-H(48E) | 109.5    | C(443)-C(433)-C(423) | 121.4(7)  |
| C(472)-C(482)-H(48F) | 109.5    | C(443)-C(433)-H(43D) | 119.3     |
| H(48D)-C(482)-H(48F) | 109.5    | C(423)-C(433)-H(43D) | 119.3     |
| H(48E)-C(482)-H(48F) | 109.5    | C(433)-C(443)-C(453) | 119.3(6)  |
| C(472)-C(492)-H(49G) | 109.5    | C(433)-C(443)-H(44B) | 120.4     |
| C(472)-C(492)-H(49H) | 109.5    | C(453)-C(443)-H(44B) | 120.4     |
| H(49G)-C(492)-H(49H) | 109.5    | C(463)-C(453)-C(443) | 122.1(6)  |
| C(472)-C(492)-H(49I) | 109.5    | C(463)-C(453)-H(45C) | 119.0     |
| H(49G)-C(492)-H(49I) | 109.5    | C(443)-C(453)-H(45C) | 119.0     |
| H(49H)-C(492)-H(49I) | 109.5    | C(453)-C(463)-C(413) | 118.5(6)  |
| C(462)-C(502)-C(522) | 109.8(5) | C(453)-C(463)-C(503) | 119.6(5)  |
| C(462)-C(502)-C(512) | 112.7(5) | C(413)-C(463)-C(503) | 121.8(5)  |
| C(522)-C(502)-C(512) | 109.4(5) | C(423)-C(473)-C(483) | 112.5(6)  |
| C(462)-C(502)-H(50G) | 108.3    | C(423)-C(473)-C(493) | 112.6(6)  |
| C(522)-C(502)-H(50G) | 108.3    | C(483)-C(473)-C(493) | 111.0(7)  |
| C(512)-C(502)-H(50G) | 108.3    | C(423)-C(473)-H(47E) | 106.8     |
| C(502)-C(512)-H(51G) | 109.5    | C(483)-C(473)-H(47E) | 106.8     |
| C(502)-C(512)-H(51H) | 109.5    | C(493)-C(473)-H(47E) | 106.8     |
| H(51G)-C(512)-H(51H) | 109.5    | C(423)-C(47')-C(48') | 99(2)     |
| C(502)-C(512)-H(51I) | 109.5    | C(423)-C(47')-C(49') | 117(2)    |
| H(51G)-C(512)-H(51I) | 109.5    | C(48')-C(47')-C(49') | 112(2)    |

|                      |          |                      |          |
|----------------------|----------|----------------------|----------|
| C(423)-C(47')-H(47F) | 109.4    | C(414)-C(464)-H(46G) | 109.5    |
| C(48')-C(47')-H(47F) | 109.4    | H(46E)-C(464)-H(46G) | 109.5    |
| C(49')-C(47')-H(47F) | 109.4    | H(46F)-C(464)-H(46G) | 109.5    |
| C(463)-C(503)-C(523) | 111.6(5) | C(414)-C(474)-H(47G) | 109.5    |
| C(463)-C(503)-C(513) | 109.4(6) | C(414)-C(474)-H(47H) | 109.5    |
| C(523)-C(503)-C(513) | 105.2(6) | H(47G)-C(474)-H(47H) | 109.5    |
| C(463)-C(503)-H(50H) | 110.2    | C(414)-C(474)-H(47I) | 109.5    |
| C(523)-C(503)-H(50H) | 110.2    | H(47G)-C(474)-H(47I) | 109.5    |
| C(513)-C(503)-H(50H) | 110.2    | H(47H)-C(474)-H(47I) | 109.5    |
| H(51M)-C(51Z)-H(51N) | 109.5    | C(414)-C(484)-H(48M) | 109.5    |
| H(51M)-C(51Z)-H(51O) | 109.5    | C(414)-C(484)-H(48N) | 109.5    |
| H(51N)-C(51Z)-H(51O) | 109.5    | H(48M)-C(484)-H(48N) | 109.5    |
| C(484)-C(414)-C(464) | 105.6(5) | C(414)-C(484)-H(48O) | 109.5    |
| C(484)-C(414)-C(474) | 110.1(5) | H(48M)-C(484)-H(48O) | 109.5    |
| C(464)-C(414)-C(474) | 106.5(5) | H(48N)-C(484)-H(48O) | 109.5    |
| C(484)-C(414)-C(424) | 107.8(5) | C(454)-C(494)-H(49P) | 109.5    |
| C(464)-C(414)-C(424) | 119.1(5) | C(454)-C(494)-H(49Q) | 109.5    |
| C(474)-C(414)-C(424) | 107.6(5) | H(49P)-C(494)-H(49Q) | 109.5    |
| N(424)-C(424)-C(434) | 121.4(5) | C(454)-C(494)-H(49R) | 109.5    |
| N(424)-C(424)-C(414) | 127.0(5) | H(49P)-C(494)-H(49R) | 109.5    |
| C(434)-C(424)-C(414) | 111.7(5) | H(49Q)-C(494)-H(49R) | 109.5    |
| C(444)-C(434)-C(424) | 130.3(5) | C(454)-C(504)-H(50I) | 109.5    |
| C(444)-C(434)-H(43E) | 114.8    | C(454)-C(504)-H(50J) | 109.5    |
| C(424)-C(434)-H(43E) | 114.8    | H(50I)-C(504)-H(50J) | 109.5    |
| N(414)-C(444)-C(434) | 122.3(5) | C(454)-C(504)-H(50K) | 109.5    |
| N(414)-C(444)-C(454) | 124.2(5) | H(50I)-C(504)-H(50K) | 109.5    |
| C(434)-C(444)-C(454) | 113.2(5) | H(50J)-C(504)-H(50K) | 109.5    |
| C(494)-C(454)-C(514) | 108.1(5) | C(454)-C(514)-H(51P) | 109.5    |
| C(494)-C(454)-C(504) | 107.5(5) | C(454)-C(514)-H(51Q) | 109.5    |
| C(514)-C(454)-C(504) | 105.3(5) | H(51P)-C(514)-H(51Q) | 109.5    |
| C(494)-C(454)-C(444) | 105.1(5) | C(454)-C(514)-H(51R) | 109.5    |
| C(514)-C(454)-C(444) | 118.6(5) | H(51P)-C(514)-H(51R) | 109.5    |
| C(504)-C(454)-C(444) | 111.9(4) | H(51Q)-C(514)-H(51R) | 109.5    |
| C(414)-C(464)-H(46E) | 109.5    | C(465)-C(415)-C(425) | 121.2(5) |
| C(414)-C(464)-H(46F) | 109.5    | C(465)-C(415)-N(424) | 119.3(5) |
| H(46E)-C(464)-H(46F) | 109.5    | C(425)-C(415)-N(424) | 119.4(5) |

|                      |          |                      |          |
|----------------------|----------|----------------------|----------|
| C(435)-C(425)-C(415) | 118.2(6) | C(465)-C(505)-H(50L) | 107.9    |
| C(435)-C(425)-C(475) | 121.3(6) | C(515)-C(505)-H(50L) | 107.9    |
| C(415)-C(425)-C(475) | 120.5(5) | C(525)-C(505)-H(50L) | 107.9    |
| C(445)-C(435)-C(425) | 121.1(7) | C(505)-C(515)-H(51S) | 109.5    |
| C(445)-C(435)-H(43F) | 119.4    | C(505)-C(515)-H(51T) | 109.5    |
| C(425)-C(435)-H(43F) | 119.4    | H(51S)-C(515)-H(51T) | 109.5    |
| C(435)-C(445)-C(455) | 121.0(6) | C(505)-C(515)-H(51U) | 109.5    |
| C(435)-C(445)-H(44C) | 119.5    | H(51S)-C(515)-H(51U) | 109.5    |
| C(455)-C(445)-H(44C) | 119.5    | H(51T)-C(515)-H(51U) | 109.5    |
| C(445)-C(455)-C(465) | 120.7(6) | C(505)-C(525)-H(52K) | 109.5    |
| C(445)-C(455)-H(45D) | 119.7    | C(505)-C(525)-H(52L) | 109.5    |
| C(465)-C(455)-H(45D) | 119.7    | H(52K)-C(525)-H(52L) | 109.5    |
| C(455)-C(465)-C(415) | 117.7(6) | C(505)-C(525)-H(52M) | 109.5    |
| C(455)-C(465)-C(505) | 118.4(6) | H(52K)-C(525)-H(52M) | 109.5    |
| C(415)-C(465)-C(505) | 123.9(5) | H(52L)-C(525)-H(52M) | 109.5    |
| C(425)-C(475)-C(485) | 108.9(5) | C(426)-C(416)-C(466) | 119.3(5) |
| C(425)-C(475)-C(495) | 113.8(5) | C(426)-C(416)-N(414) | 122.3(5) |
| C(485)-C(475)-C(495) | 110.5(5) | C(466)-C(416)-N(414) | 118.4(5) |
| C(425)-C(475)-H(47J) | 107.8    | C(424)-N(424)-C(415) | 122.3(4) |
| C(485)-C(475)-H(47J) | 107.8    | C(424)-N(424)-Co(6)  | 121.5(4) |
| C(495)-C(475)-H(47J) | 107.8    | C(415)-N(424)-Co(6)  | 116.2(3) |
| C(475)-C(485)-H(48P) | 109.5    | C(436)-C(426)-C(416) | 118.9(5) |
| C(475)-C(485)-H(48Q) | 109.5    | C(436)-C(426)-C(476) | 117.7(5) |
| H(48P)-C(485)-H(48Q) | 109.5    | C(416)-C(426)-C(476) | 123.4(5) |
| C(475)-C(485)-H(48R) | 109.5    | C(446)-C(436)-C(426) | 121.5(6) |
| H(48P)-C(485)-H(48R) | 109.5    | C(446)-C(436)-H(43G) | 119.3    |
| H(48Q)-C(485)-H(48R) | 109.5    | C(426)-C(436)-H(43G) | 119.3    |
| C(475)-C(495)-H(49S) | 109.5    | C(456)-C(446)-C(436) | 119.5(6) |
| C(475)-C(495)-H(49T) | 109.5    | C(456)-C(446)-H(44D) | 120.2    |
| H(49S)-C(495)-H(49T) | 109.5    | C(436)-C(446)-H(44D) | 120.2    |
| C(475)-C(495)-H(49U) | 109.5    | C(446)-C(456)-C(466) | 121.5(6) |
| H(49S)-C(495)-H(49U) | 109.5    | C(446)-C(456)-H(45E) | 119.2    |
| H(49T)-C(495)-H(49U) | 109.5    | C(466)-C(456)-H(45E) | 119.2    |
| C(465)-C(505)-C(515) | 109.7(5) | C(456)-C(466)-C(416) | 118.9(5) |
| C(465)-C(505)-C(525) | 114.2(5) | C(456)-C(466)-C(506) | 118.6(5) |
| C(515)-C(505)-C(525) | 109.1(5) | C(416)-C(466)-C(506) | 122.4(5) |

|                      |          |                      |           |
|----------------------|----------|----------------------|-----------|
| C(486)-C(476)-C(426) | 110.8(5) | C(27)-C(17)-H(17A)   | 109.5     |
| C(486)-C(476)-C(496) | 108.5(5) | C(27)-C(17)-H(17B)   | 109.5     |
| C(426)-C(476)-C(496) | 112.3(5) | H(17A)-C(17)-H(17B)  | 109.5     |
| C(486)-C(476)-H(47K) | 108.4    | C(27)-C(17)-H(17C)   | 109.5     |
| C(426)-C(476)-H(47K) | 108.4    | H(17A)-C(17)-H(17C)  | 109.5     |
| C(496)-C(476)-H(47K) | 108.4    | H(17B)-C(17)-H(17C)  | 109.5     |
| C(476)-C(486)-H(48S) | 109.5    | C(37)-C(27)-C(77)    | 120.0     |
| C(476)-C(486)-H(48T) | 109.5    | C(37)-C(27)-C(17)    | 130.4(12) |
| H(48S)-C(486)-H(48T) | 109.5    | C(77)-C(27)-C(17)    | 109.5(12) |
| C(476)-C(486)-H(48U) | 109.5    | C(27)-C(37)-C(47)    | 120.0     |
| H(48S)-C(486)-H(48U) | 109.5    | C(27)-C(37)-H(37A)   | 120.0     |
| H(48T)-C(486)-H(48U) | 109.5    | C(47)-C(37)-H(37A)   | 120.0     |
| C(476)-C(496)-H(49V) | 109.5    | C(57)-C(47)-C(37)    | 120.0     |
| C(476)-C(496)-H(49W) | 109.5    | C(57)-C(47)-H(47N)   | 120.0     |
| H(49V)-C(496)-H(49W) | 109.5    | C(37)-C(47)-H(47N)   | 120.0     |
| C(476)-C(496)-H(49X) | 109.5    | C(47)-C(57)-C(67)    | 120.0     |
| H(49V)-C(496)-H(49X) | 109.5    | C(47)-C(57)-H(57A)   | 120.0     |
| H(49W)-C(496)-H(49X) | 109.5    | C(67)-C(57)-H(57A)   | 120.0     |
| C(526)-C(506)-C(466) | 112.6(5) | C(77)-C(67)-C(57)    | 120.0     |
| C(526)-C(506)-C(516) | 108.1(5) | C(77)-C(67)-H(67A)   | 120.0     |
| C(466)-C(506)-C(516) | 112.3(5) | C(57)-C(67)-H(67A)   | 120.0     |
| C(526)-C(506)-H(50M) | 107.9    | C(67)-C(77)-C(27)    | 120.0     |
| C(466)-C(506)-H(50M) | 107.9    | C(67)-C(77)-H(77A)   | 120.0     |
| C(516)-C(506)-H(50M) | 107.9    | C(27)-C(77)-H(77A)   | 120.0     |
| C(506)-C(516)-H(51V) | 109.5    | C(97)-C(87)-H(87A)   | 109.5     |
| C(506)-C(516)-H(51W) | 109.5    | C(97)-C(87)-H(87B)   | 109.5     |
| H(51V)-C(516)-H(51W) | 109.5    | H(87A)-C(87)-H(87B)  | 109.5     |
| C(506)-C(516)-H(51X) | 109.5    | C(97)-C(87)-H(87C)   | 109.5     |
| H(51V)-C(516)-H(51X) | 109.5    | H(87A)-C(87)-H(87C)  | 109.5     |
| H(51W)-C(516)-H(51X) | 109.5    | H(87B)-C(87)-H(87C)  | 109.5     |
| C(506)-C(526)-H(52N) | 109.5    | C(107)-C(97)-C(147)  | 120.0     |
| C(506)-C(526)-H(52O) | 109.5    | C(107)-C(97)-C(87)   | 119.9(13) |
| H(52N)-C(526)-H(52O) | 109.5    | C(147)-C(97)-C(87)   | 120.1(13) |
| C(506)-C(526)-H(52P) | 109.5    | C(117)-C(107)-C(97)  | 120.0     |
| H(52N)-C(526)-H(52P) | 109.5    | C(117)-C(107)-H(107) | 120.0     |
| H(52O)-C(526)-H(52P) | 109.5    | C(97)-C(107)-H(107)  | 120.0     |

|                      |          |                      |           |
|----------------------|----------|----------------------|-----------|
| C(107)-C(117)-C(127) | 120.0    | C(16')-C(15')-H(15D) | 109.5     |
| C(107)-C(117)-H(117) | 120.0    | C(16')-C(15')-H(15E) | 109.5     |
| C(127)-C(117)-H(117) | 120.0    | H(15D)-C(15')-H(15E) | 109.5     |
| C(137)-C(127)-C(117) | 120.0    | C(16')-C(15')-H(15F) | 109.5     |
| C(137)-C(127)-H(127) | 120.0    | H(15D)-C(15')-H(15F) | 109.5     |
| C(117)-C(127)-H(127) | 120.0    | H(15E)-C(15')-H(15F) | 109.5     |
| C(147)-C(137)-C(127) | 120.0    | C(17')-C(16')-C(21') | 120.0     |
| C(147)-C(137)-H(137) | 120.0    | C(17')-C(16')-C(15') | 119.7(17) |
| C(127)-C(137)-H(137) | 120.0    | C(21')-C(16')-C(15') | 120.1(17) |
| C(137)-C(147)-C(97)  | 120.0    | C(16')-C(17')-C(18') | 120.0     |
| C(137)-C(147)-H(147) | 120.0    | C(16')-C(17')-H(17E) | 120.0     |
| C(97)-C(147)-H(147)  | 120.0    | C(18')-C(17')-H(17E) | 120.0     |
| C(167)-C(157)-H(15A) | 109.5    | C(19')-C(18')-C(17') | 120.0     |
| C(167)-C(157)-H(15B) | 109.5    | C(19')-C(18')-H(18B) | 120.0     |
| H(15A)-C(157)-H(15B) | 109.5    | C(17')-C(18')-H(18B) | 120.0     |
| C(167)-C(157)-H(15C) | 109.5    | C(20')-C(19')-C(18') | 120.0     |
| H(15A)-C(157)-H(15C) | 109.5    | C(20')-C(19')-H(19B) | 120.0     |
| H(15B)-C(157)-H(15C) | 109.5    | C(18')-C(19')-H(19B) | 120.0     |
| C(177)-C(167)-C(217) | 120.0    | C(19')-C(20')-C(21') | 120.0     |
| C(177)-C(167)-C(157) | 121.2(8) | C(19')-C(20')-H(20B) | 120.0     |
| C(217)-C(167)-C(157) | 118.8(8) | C(21')-C(20')-H(20B) | 120.0     |
| C(187)-C(177)-C(167) | 120.0    | C(20')-C(21')-C(16') | 120.0     |
| C(187)-C(177)-H(17D) | 120.0    | C(20')-C(21')-H(21B) | 120.0     |
| C(167)-C(177)-H(17D) | 120.0    | C(16')-C(21')-H(21B) | 120.0     |
| C(177)-C(187)-C(197) | 120.0    | C(237)-C(227)-H(22A) | 109.5     |
| C(177)-C(187)-H(18A) | 120.0    | C(237)-C(227)-H(22B) | 109.5     |
| C(197)-C(187)-H(18A) | 120.0    | H(22A)-C(227)-H(22B) | 109.5     |
| C(207)-C(197)-C(187) | 120.0    | C(237)-C(227)-H(22C) | 109.5     |
| C(207)-C(197)-H(19A) | 120.0    | H(22A)-C(227)-H(22C) | 109.5     |
| C(187)-C(197)-H(19A) | 120.0    | H(22B)-C(227)-H(22C) | 109.5     |
| C(197)-C(207)-C(217) | 120.0    | C(247)-C(237)-C(287) | 120.0     |
| C(197)-C(207)-H(20A) | 120.0    | C(247)-C(237)-C(227) | 119.2(7)  |
| C(217)-C(207)-H(20A) | 120.0    | C(287)-C(237)-C(227) | 120.8(7)  |
| C(207)-C(217)-C(167) | 120.0    | C(237)-C(247)-C(257) | 120.0     |
| C(207)-C(217)-H(21A) | 120.0    | C(237)-C(247)-H(247) | 120.0     |
| C(167)-C(217)-H(21A) | 120.0    | C(257)-C(247)-H(247) | 120.0     |



|                      |       |                      |           |
|----------------------|-------|----------------------|-----------|
| C(267)-C(257)-C(247) | 120.0 | C(24')-C(23')-C(28') | 120.0     |
| C(267)-C(257)-H(257) | 120.0 | C(24')-C(23')-C(22') | 120.3(12) |
| C(247)-C(257)-H(257) | 120.0 | C(28')-C(23')-C(22') | 119.6(12) |
| C(277)-C(267)-C(257) | 120.0 | C(25')-C(24')-C(23') | 120.0     |
| C(277)-C(267)-H(267) | 120.0 | C(25')-C(24')-H(24') | 120.0     |
| C(257)-C(267)-H(267) | 120.0 | C(23')-C(24')-H(24') | 120.0     |
| C(267)-C(277)-C(287) | 120.0 | C(24')-C(25')-C(26') | 120.0     |
| C(267)-C(277)-H(277) | 120.0 | C(24')-C(25')-H(25') | 120.0     |
| C(287)-C(277)-H(277) | 120.0 | C(26')-C(25')-H(25') | 120.0     |
| C(277)-C(287)-C(237) | 120.0 | C(27')-C(26')-C(25') | 120.0     |
| C(277)-C(287)-H(287) | 120.0 | C(27')-C(26')-H(26') | 120.0     |
| C(237)-C(287)-H(287) | 120.0 | C(25')-C(26')-H(26') | 120.0     |
| C(23')-C(22')-H(22D) | 109.5 | C(26')-C(27')-C(28') | 120.0     |
| C(23')-C(22')-H(22E) | 109.5 | C(26')-C(27')-H(27') | 120.0     |
| H(22D)-C(22')-H(22E) | 109.5 | C(28')-C(27')-H(27') | 120.0     |
| C(23')-C(22')-H(22F) | 109.5 | C(27')-C(28')-C(23') | 120.0     |
| H(22D)-C(22')-H(22F) | 109.5 | C(27')-C(28')-H(28') | 120.0     |
| H(22E)-C(22')-H(22F) | 109.5 | C(23')-C(28')-H(28') | 120.0     |

---

Table 4. Anisotropic displacement parameters ( $\text{\AA}^2 \times 10^3$ ) for holkd15. The anisotropic displacement factor exponent takes the form:  $-2\pi^2 [ h^2 a^{*2} U_{11} + \dots + 2 h k a^* b^* U_{12} ]$

|      | $U_{11}$ | $U_{22}$ | $U_{33}$ | $U_{23}$ | $U_{13}$ | $U_{12}$ |
|------|----------|----------|----------|----------|----------|----------|
| Co1  | 15(1)    | 18(1)    | 13(1)    | -1(1)    | 0(1)     | -2(1)    |
| Co2  | 15(1)    | 16(1)    | 14(1)    | -2(1)    | -1(1)    | -2(1)    |
| N11  | 14(3)    | 20(3)    | 14(2)    | -6(2)    | 3(2)     | 0(2)     |
| N21  | 17(3)    | 18(3)    | 14(3)    | -3(2)    | 0(2)     | -3(2)    |
| N14  | 12(2)    | 17(3)    | 19(3)    | -6(2)    | -2(2)    | -6(2)    |
| N24  | 22(3)    | 13(3)    | 15(3)    | -3(2)    | -2(2)    | 2(2)     |
| C11  | 24(3)    | 25(3)    | 12(3)    | -2(3)    | 2(3)     | 1(3)     |
| C21  | 20(3)    | 16(3)    | 10(3)    | -2(2)    | 3(2)     | -4(2)    |
| C31  | 17(3)    | 23(3)    | 16(3)    | -5(3)    | 9(3)     | -1(3)    |
| C41  | 14(3)    | 19(3)    | 17(3)    | -1(3)    | 0(3)     | 2(2)     |
| C51  | 21(3)    | 31(4)    | 20(3)    | 2(3)     | 0(3)     | -7(3)    |
| C61  | 38(4)    | 37(4)    | 17(3)    | 10(3)    | -1(3)    | -6(3)    |
| C71  | 32(4)    | 36(4)    | 19(3)    | 7(3)     | -4(3)    | -7(3)    |
| C81  | 48(4)    | 42(4)    | 11(3)    | -4(3)    | -2(3)    | -3(3)    |
| C91  | 17(3)    | 53(5)    | 22(3)    | -1(3)    | -3(3)    | -14(3)   |
| C101 | 17(3)    | 62(5)    | 23(4)    | -9(3)    | 5(3)     | -2(3)    |
| C111 | 33(4)    | 40(4)    | 40(4)    | -1(3)    | -6(3)    | -16(3)   |
| C12  | 26(3)    | 17(3)    | 4(3)     | 0(2)     | 0(2)     | -4(3)    |
| C22  | 24(3)    | 20(3)    | 11(3)    | -3(2)    | 1(3)     | -3(3)    |
| C32  | 25(4)    | 20(3)    | 24(3)    | -1(3)    | -7(3)    | 0(3)     |
| C42  | 32(4)    | 21(3)    | 23(3)    | -1(3)    | -6(3)    | 7(3)     |
| C52  | 37(4)    | 19(3)    | 22(3)    | -7(3)    | 1(3)     | -7(3)    |
| C62  | 24(3)    | 19(3)    | 9(3)     | 1(2)     | -2(3)    | -4(3)    |
| C72  | 22(3)    | 15(3)    | 20(3)    | -3(3)    | -7(3)    | 4(3)     |
| C82  | 30(4)    | 21(4)    | 32(4)    | -5(3)    | -7(3)    | -1(3)    |
| C92  | 27(4)    | 30(4)    | 31(4)    | -3(3)    | -12(3)   | -6(3)    |
| C102 | 19(3)    | 18(3)    | 26(3)    | -8(3)    | -1(3)    | 2(3)     |
| C112 | 34(4)    | 34(4)    | 31(4)    | -8(3)    | -3(3)    | -13(3)   |
| C122 | 57(5)    | 30(4)    | 35(4)    | -3(3)    | -6(4)    | -24(3)   |
| C13  | 11(3)    | 32(4)    | 14(3)    | 9(3)     | -2(2)    | -10(3)   |
| C23  | 19(3)    | 29(4)    | 16(3)    | 3(3)     | 0(3)     | -11(3)   |

|      |       |       |       |        |        |        |
|------|-------|-------|-------|--------|--------|--------|
| C33  | 26(4) | 42(4) | 20(3) | 1(3)   | 0(3)   | -14(3) |
| C43  | 21(4) | 51(5) | 25(4) | 14(3)  | -6(3)  | -18(3) |
| C53  | 13(3) | 37(4) | 40(4) | 8(3)   | -4(3)  | -2(3)  |
| C63  | 18(3) | 38(4) | 22(3) | 10(3)  | -1(3)  | -8(3)  |
| C73  | 21(3) | 37(4) | 15(3) | 0(3)   | 0(3)   | -14(3) |
| C83  | 37(4) | 54(5) | 34(4) | -13(3) | 6(3)   | -23(4) |
| C93  | 32(4) | 37(4) | 23(3) | -5(3)  | -4(3)  | -13(3) |
| C103 | 29(4) | 19(3) | 36(4) | -4(3)  | -6(3)  | 4(3)   |
| C113 | 32(4) | 47(5) | 55(5) | -18(4) | 2(4)   | -5(3)  |
| C123 | 30(4) | 29(4) | 66(5) | -2(4)  | -16(4) | 2(3)   |
| C14  | 16(3) | 27(4) | 21(3) | -4(3)  | 1(3)   | -7(3)  |
| C24  | 11(3) | 20(3) | 21(3) | -1(3)  | -4(3)  | 5(2)   |
| C34  | 13(3) | 24(3) | 26(3) | -5(3)  | -5(3)  | -5(3)  |
| C44  | 16(3) | 17(3) | 19(3) | 0(3)   | -7(3)  | -4(2)  |
| C54  | 27(4) | 25(4) | 24(3) | -4(3)  | -3(3)  | -8(3)  |
| C64  | 14(3) | 31(4) | 22(3) | -2(3)  | 4(3)   | -5(3)  |
| C74  | 16(3) | 48(4) | 37(4) | -18(3) | 3(3)   | -2(3)  |
| C84  | 57(5) | 37(4) | 31(4) | -6(3)  | 18(4)  | -21(4) |
| C94  | 33(4) | 28(4) | 29(4) | -11(3) | -9(3)  | -12(3) |
| C104 | 40(4) | 24(4) | 41(4) | -2(3)  | -8(3)  | -12(3) |
| C114 | 34(4) | 33(4) | 40(4) | -17(3) | -8(3)  | -3(3)  |
| C15  | 17(3) | 24(3) | 11(3) | 1(3)   | 4(2)   | -9(3)  |
| C25  | 11(3) | 36(4) | 13(3) | -2(3)  | 2(2)   | -11(3) |
| C35  | 24(4) | 38(4) | 14(3) | 2(3)   | -1(3)  | -17(3) |
| C45  | 40(4) | 40(4) | 7(3)  | -9(3)  | 5(3)   | -23(3) |
| C55  | 38(4) | 22(4) | 28(4) | -12(3) | 16(3)  | -16(3) |
| C65  | 24(3) | 24(3) | 14(3) | -2(3)  | 7(3)   | -6(3)  |
| C75  | 20(3) | 29(4) | 17(3) | 4(3)   | -7(3)  | -2(3)  |
| C85  | 29(4) | 52(5) | 56(5) | -1(4)  | 18(4)  | 7(4)   |
| C95  | 33(4) | 50(5) | 29(4) | 5(3)   | -5(3)  | -3(3)  |
| C105 | 27(4) | 23(3) | 23(3) | -5(3)  | 3(3)   | 0(3)   |
| C115 | 31(4) | 30(4) | 42(4) | -5(3)  | 10(3)  | 3(3)   |
| C125 | 37(4) | 21(3) | 25(4) | -2(3)  | 2(3)   | -2(3)  |
| C16  | 25(3) | 19(3) | 23(3) | -6(3)  | -7(3)  | -3(3)  |
| C26  | 23(3) | 17(3) | 28(4) | -9(3)  | -2(3)  | 2(3)   |
| C36  | 44(4) | 24(4) | 27(4) | -7(3)  | 4(3)   | 2(3)   |

|      |       |         |        |        |        |        |
|------|-------|---------|--------|--------|--------|--------|
| C46  | 50(5) | 24(4)   | 47(5)  | -14(3) | -1(4)  | 8(3)   |
| C56  | 43(4) | 18(4)   | 41(4)  | 0(3)   | -10(4) | -1(3)  |
| C66  | 26(4) | 21(3)   | 35(4)  | -6(3)  | -10(3) | -5(3)  |
| C76  | 31(4) | 21(3)   | 23(3)  | -9(3)  | 0(3)   | 8(3)   |
| C86  | 50(5) | 36(4)   | 23(4)  | -9(3)  | -6(3)  | 0(3)   |
| C96  | 48(5) | 26(4)   | 35(4)  | -6(3)  | 9(3)   | 0(3)   |
| C106 | 40(4) | 25(4)   | 26(4)  | 2(3)   | -5(3)  | 2(3)   |
| C116 | 51(5) | 42(5)   | 38(4)  | 3(3)   | -14(4) | -6(4)  |
| C126 | 51(5) | 62(5)   | 28(4)  | 4(4)   | -4(4)  | -18(4) |
| Co3  | 16(1) | 17(1)   | 14(1)  | 0(1)   | 1(1)   | -5(1)  |
| Co4  | 14(1) | 14(1)   | 15(1)  | -3(1)  | 1(1)   | -3(1)  |
| N211 | 22(3) | 23(3)   | 12(3)  | -3(2)  | -2(2)  | -6(2)  |
| N221 | 20(3) | 14(3)   | 21(3)  | -2(2)  | -4(2)  | 0(2)   |
| N214 | 14(3) | 14(3)   | 14(2)  | -5(2)  | 5(2)   | -3(2)  |
| N224 | 19(3) | 12(3)   | 18(3)  | -3(2)  | 1(2)   | -2(2)  |
| C231 | 33(4) | 34(4)   | 14(3)  | 1(3)   | 11(3)  | -15(3) |
| C241 | 29(4) | 26(4)   | 19(3)  | -5(3)  | 2(3)   | -8(3)  |
| C251 | 39(4) | 30(4)   | 26(4)  | 4(3)   | -2(3)  | -9(3)  |
| C221 | 19(3) | 37(4)   | 20(3)  | -9(3)  | 2(3)   | -8(3)  |
| C211 | 24(4) | 60(5)   | 20(4)  | -5(3)  | 4(3)   | -20(3) |
| C261 | 21(4) | 140(16) | 26(4)  | -16(6) | 11(3)  | -16(6) |
| C271 | 55(6) | 59(6)   | 39(11) | 7(5)   | -13(6) | -40(5) |
| C281 | 14(3) | 58(5)   | 27(4)  | -7(3)  | 3(3)   | -16(3) |
| C21" | 24(4) | 60(5)   | 20(4)  | -5(3)  | 4(3)   | -20(3) |
| C26" | 21(4) | 140(16) | 26(4)  | -16(6) | 11(3)  | -16(6) |
| C27" | 55(6) | 59(6)   | 39(11) | 7(5)   | -13(6) | -40(5) |
| C28" | 14(3) | 58(5)   | 27(4)  | -7(3)  | 3(3)   | -16(3) |
| C291 | 54(5) | 33(4)   | 26(4)  | 2(3)   | -13(3) | -8(3)  |
| C301 | 70(6) | 47(5)   | 34(4)  | 11(4)  | -11(4) | -31(4) |
| C311 | 55(5) | 32(4)   | 25(4)  | 11(3)  | -4(3)  | 3(3)   |
| C212 | 14(3) | 35(4)   | 22(3)  | 4(3)   | 0(3)   | -9(3)  |
| C222 | 17(3) | 33(4)   | 15(3)  | -3(3)  | 2(3)   | -10(3) |
| C232 | 17(3) | 43(4)   | 20(3)  | -2(3)  | 1(3)   | -17(3) |
| C242 | 15(3) | 31(4)   | 39(4)  | 2(3)   | -4(3)  | -2(3)  |
| C252 | 15(3) | 25(4)   | 47(4)  | -4(3)  | -4(3)  | 2(3)   |
| C262 | 10(3) | 29(4)   | 35(4)  | -6(3)  | 0(3)   | -6(3)  |

|      |        |       |       |        |        |        |
|------|--------|-------|-------|--------|--------|--------|
| C272 | 30(4)  | 34(4) | 21(3) | -5(3)  | -4(3)  | -16(3) |
| C282 | 34(4)  | 28(4) | 29(4) | -11(3) | 0(3)   | -5(3)  |
| C292 | 46(5)  | 45(4) | 37(4) | -10(3) | -2(4)  | -22(4) |
| C302 | 22(4)  | 34(4) | 39(4) | -18(3) | -6(3)  | 4(3)   |
| C312 | 31(4)  | 34(4) | 60(5) | -14(4) | -16(4) | -2(3)  |
| C322 | 26(4)  | 86(6) | 58(5) | -45(5) | -2(4)  | 6(4)   |
| C213 | 25(3)  | 12(3) | 19(3) | 1(2)   | -4(3)  | 0(3)   |
| C223 | 24(3)  | 16(3) | 20(3) | 4(3)   | -4(3)  | 2(3)   |
| C233 | 36(4)  | 20(4) | 33(4) | 0(3)   | -7(3)  | 1(3)   |
| C243 | 47(5)  | 17(4) | 35(4) | 6(3)   | 4(3)   | 13(3)  |
| C253 | 63(5)  | 13(3) | 37(4) | -9(3)  | 0(4)   | -9(3)  |
| C263 | 37(4)  | 12(3) | 25(4) | -3(3)  | 7(3)   | -3(3)  |
| C273 | 28(4)  | 21(3) | 19(3) | -4(3)  | -12(3) | 2(3)   |
| C283 | 43(5)  | 45(5) | 47(5) | -10(4) | -18(4) | 0(4)   |
| C293 | 26(4)  | 29(4) | 49(4) | -10(3) | 7(3)   | -8(3)  |
| C303 | 40(4)  | 24(4) | 58(5) | -17(3) | 4(4)   | -11(3) |
| C313 | 49(5)  | 54(5) | 49(5) | 2(4)   | -14(4) | -11(4) |
| C323 | 102(7) | 78(6) | 43(5) | -14(4) | -5(5)  | -60(6) |
| C214 | 20(3)  | 42(4) | 19(3) | -9(3)  | 1(3)   | -11(3) |
| C224 | 17(3)  | 22(3) | 22(3) | -4(3)  | 2(3)   | -3(3)  |
| C234 | 4(3)   | 36(4) | 29(4) | -8(3)  | -1(3)  | -5(3)  |
| C244 | 24(3)  | 11(3) | 18(3) | 0(2)   | 1(3)   | 1(3)   |
| C254 | 18(3)  | 26(4) | 30(4) | -13(3) | 4(3)   | -7(3)  |
| C264 | 27(4)  | 56(5) | 15(3) | -13(3) | 12(3)  | -15(3) |
| C274 | 30(4)  | 68(5) | 31(4) | -14(4) | 4(3)   | -18(4) |
| C284 | 43(4)  | 43(4) | 34(4) | 0(3)   | 16(3)  | -23(4) |
| C294 | 25(4)  | 31(4) | 46(4) | -19(3) | -4(3)  | -9(3)  |
| C304 | 26(4)  | 43(4) | 27(4) | -8(3)  | -13(3) | -10(3) |
| C314 | 24(4)  | 28(4) | 34(4) | -8(3)  | -6(3)  | -12(3) |
| C215 | 13(3)  | 32(4) | 14(3) | -8(3)  | 7(3)   | -8(3)  |
| C225 | 16(3)  | 30(4) | 17(3) | -6(3)  | 2(3)   | -8(3)  |
| C235 | 16(3)  | 41(4) | 20(3) | -3(3)  | -2(3)  | -6(3)  |
| C245 | 23(4)  | 55(5) | 29(4) | -24(4) | 4(3)   | -12(3) |
| C255 | 25(4)  | 31(4) | 33(4) | -16(3) | 10(3)  | -9(3)  |
| C265 | 19(3)  | 28(4) | 17(3) | -5(3)  | 7(3)   | -16(3) |
| C275 | 28(4)  | 26(4) | 16(3) | 3(3)   | 0(3)   | -6(3)  |

|      |        |       |       |        |        |        |
|------|--------|-------|-------|--------|--------|--------|
| C285 | 33(4)  | 32(4) | 77(6) | -1(4)  | 20(4)  | 0(3)   |
| C295 | 55(5)  | 51(5) | 29(4) | 14(3)  | -8(4)  | -6(4)  |
| C305 | 28(4)  | 18(3) | 22(3) | -5(3)  | 10(3)  | -2(3)  |
| C315 | 46(4)  | 28(4) | 37(4) | -4(3)  | 10(3)  | -2(3)  |
| C325 | 28(4)  | 32(4) | 33(4) | -9(3)  | -2(3)  | 10(3)  |
| C216 | 15(3)  | 16(3) | 21(3) | -5(3)  | -2(3)  | -5(2)  |
| C226 | 19(3)  | 22(3) | 18(3) | -6(3)  | -6(3)  | -3(3)  |
| C236 | 30(4)  | 28(4) | 16(3) | -10(3) | -1(3)  | -6(3)  |
| C246 | 32(4)  | 23(4) | 30(4) | -19(3) | 4(3)   | 1(3)   |
| C256 | 31(4)  | 17(3) | 22(3) | -5(3)  | 1(3)   | 7(3)   |
| C266 | 26(4)  | 21(3) | 22(3) | 5(3)   | -5(3)  | -8(3)  |
| C276 | 24(3)  | 17(3) | 21(3) | -2(3)  | 1(3)   | -3(3)  |
| C286 | 32(4)  | 40(4) | 20(3) | -8(3)  | 1(3)   | -2(3)  |
| C296 | 40(4)  | 33(4) | 24(4) | -4(3)  | 5(3)   | -5(3)  |
| C306 | 33(4)  | 20(3) | 17(3) | 1(3)   | 0(3)   | 5(3)   |
| C316 | 51(5)  | 34(4) | 41(4) | 10(3)  | 3(4)   | -14(4) |
| C326 | 49(5)  | 46(5) | 27(4) | -8(3)  | -8(3)  | 3(4)   |
| Co5  | 15(1)  | 17(1) | 16(1) | -2(1)  | -1(1)  | -2(1)  |
| Co6  | 14(1)  | 21(1) | 15(1) | -5(1)  | 0(1)   | -5(1)  |
| N411 | 19(3)  | 22(3) | 11(2) | -2(2)  | -1(2)  | -2(2)  |
| N421 | 21(3)  | 11(3) | 20(3) | -7(2)  | -4(2)  | 0(2)   |
| N414 | 21(3)  | 17(3) | 13(3) | -1(2)  | -4(2)  | -4(2)  |
| C411 | 24(3)  | 26(4) | 22(3) | 3(3)   | -1(3)  | -8(3)  |
| C421 | 25(3)  | 22(3) | 11(3) | 2(3)   | 2(3)   | -7(3)  |
| C431 | 30(4)  | 26(4) | 10(3) | -2(3)  | 10(3)  | -6(3)  |
| C441 | 34(4)  | 13(3) | 15(3) | -6(2)  | 1(3)   | 0(3)   |
| C461 | 21(4)  | 38(4) | 25(3) | 0(3)   | 4(3)   | -11(3) |
| C471 | 40(5)  | 37(5) | 66(5) | 8(4)   | -16(4) | -18(4) |
| C481 | 18(4)  | 88(6) | 25(4) | -7(4)  | 4(3)   | -4(4)  |
| C451 | 21(5)  | 25(4) | 15(3) | 3(3)   | -5(3)  | 0(3)   |
| C491 | 36(13) | 41(5) | 10(8) | -2(5)  | 4(9)   | 6(7)   |
| C501 | 42(7)  | 35(7) | 22(3) | 7(4)   | -4(4)  | 3(3)   |
| C511 | 42(7)  | 35(7) | 22(3) | 7(4)   | -4(4)  | 3(3)   |
| C45" | 21(5)  | 25(4) | 15(3) | 3(3)   | -5(3)  | 0(3)   |
| C49" | 36(13) | 41(5) | 10(8) | -2(5)  | 4(9)   | 6(7)   |
| C50" | 42(7)  | 35(7) | 22(3) | 7(4)   | -4(4)  | 3(3)   |

|      |        |       |       |        |        |        |
|------|--------|-------|-------|--------|--------|--------|
| C51" | 42(7)  | 35(7) | 22(3) | 7(4)   | -4(4)  | 3(3)   |
| C412 | 9(3)   | 20(3) | 17(3) | -1(3)  | 4(2)   | -5(2)  |
| C422 | 12(3)  | 26(4) | 17(3) | 0(3)   | 4(3)   | -9(3)  |
| C432 | 18(3)  | 32(4) | 20(3) | -3(3)  | -3(3)  | -8(3)  |
| C442 | 25(4)  | 26(4) | 30(4) | 13(3)  | -11(3) | -8(3)  |
| C452 | 20(3)  | 17(3) | 35(4) | 8(3)   | 0(3)   | -4(3)  |
| C462 | 15(3)  | 19(3) | 25(3) | -1(3)  | -3(3)  | -8(3)  |
| C472 | 25(4)  | 28(4) | 17(3) | -9(3)  | 7(3)   | -9(3)  |
| C482 | 49(5)  | 43(5) | 57(5) | -14(4) | -7(4)  | -21(4) |
| C492 | 45(5)  | 41(5) | 63(5) | -15(4) | 16(4)  | -14(4) |
| C502 | 21(3)  | 19(3) | 35(4) | -3(3)  | -5(3)  | 3(3)   |
| C512 | 36(4)  | 43(5) | 54(5) | -27(4) | 4(4)   | -5(3)  |
| C522 | 17(3)  | 23(4) | 51(4) | -11(3) | -6(3)  | -2(3)  |
| C413 | 34(4)  | 17(3) | 12(3) | -3(2)  | -6(3)  | -1(3)  |
| C423 | 25(4)  | 27(4) | 24(3) | -11(3) | -10(3) | 5(3)   |
| C433 | 31(4)  | 42(5) | 45(4) | -13(4) | -18(3) | 16(3)  |
| C443 | 50(5)  | 28(4) | 54(5) | -10(4) | -17(4) | 18(4)  |
| C453 | 55(5)  | 15(3) | 31(4) | -6(3)  | -6(4)  | 5(3)   |
| C463 | 36(4)  | 19(3) | 15(3) | -3(3)  | 2(3)   | -5(3)  |
| C473 | 30(4)  | 23(4) | 11(5) | -5(4)  | -9(5)  | 4(4)   |
| C483 | 16(4)  | 28(5) | 48(7) | -2(5)  | -10(5) | -2(4)  |
| C493 | 61(7)  | 26(6) | 52(8) | -9(5)  | -33(6) | -2(5)  |
| C47' | 30(4)  | 23(4) | 11(5) | -5(4)  | -9(5)  | 4(4)   |
| C48' | 16(4)  | 28(5) | 48(7) | -2(5)  | -10(5) | -2(4)  |
| C49' | 61(7)  | 26(6) | 52(8) | -9(5)  | -33(6) | -2(5)  |
| C503 | 38(4)  | 25(4) | 42(4) | -14(3) | 6(3)   | -12(3) |
| C513 | 72(10) | 55(8) | 54(6) | 6(6)   | -25(7) | -34(7) |
| C523 | 42(5)  | 94(7) | 37(5) | 0(4)   | -7(4)  | -28(4) |
| C50Z | 38(4)  | 25(4) | 42(4) | -14(3) | 6(3)   | -12(3) |
| C51Z | 72(10) | 55(8) | 54(6) | 6(6)   | -25(7) | -34(7) |
| C52Z | 42(5)  | 94(7) | 37(5) | 0(4)   | -7(4)  | -28(4) |
| C414 | 17(3)  | 38(4) | 23(3) | -6(3)  | 5(3)   | -12(3) |
| C424 | 20(3)  | 19(3) | 18(3) | -2(3)  | 3(3)   | -5(3)  |
| C434 | 16(3)  | 25(4) | 26(3) | -9(3)  | -5(3)  | -8(3)  |
| C444 | 12(3)  | 21(3) | 22(3) | 1(3)   | -3(3)  | -6(3)  |
| C454 | 15(3)  | 27(4) | 24(3) | -8(3)  | -1(3)  | -3(3)  |

|      |        |       |         |        |        |        |
|------|--------|-------|---------|--------|--------|--------|
| C464 | 30(4)  | 55(5) | 18(3)   | -9(3)  | 11(3)  | -21(3) |
| C474 | 17(4)  | 69(5) | 35(4)   | -22(4) | 13(3)  | -13(3) |
| C484 | 38(4)  | 47(5) | 27(4)   | -11(3) | 16(3)  | -22(3) |
| C494 | 28(4)  | 31(4) | 22(3)   | -3(3)  | -11(3) | -10(3) |
| C504 | 25(4)  | 33(4) | 31(4)   | -9(3)  | -3(3)  | -14(3) |
| C514 | 24(4)  | 27(4) | 34(4)   | -17(3) | -7(3)  | -10(3) |
| C415 | 19(3)  | 31(4) | 18(3)   | -13(3) | 9(3)   | -13(3) |
| C425 | 13(3)  | 40(4) | 18(3)   | -4(3)  | 5(3)   | -10(3) |
| C435 | 22(4)  | 70(5) | 18(4)   | -14(4) | 5(3)   | -16(4) |
| C445 | 27(4)  | 64(5) | 28(4)   | -21(4) | 4(3)   | -19(4) |
| C455 | 28(4)  | 43(4) | 31(4)   | -18(3) | 8(3)   | -14(3) |
| C465 | 14(3)  | 29(4) | 19(3)   | -10(3) | 6(3)   | -5(3)  |
| C475 | 18(3)  | 45(4) | 16(3)   | -2(3)  | -5(3)  | -7(3)  |
| C485 | 30(4)  | 37(4) | 55(5)   | -2(4)  | 1(4)   | 2(3)   |
| C495 | 62(5)  | 61(5) | 25(4)   | 11(4)  | -8(4)  | -26(4) |
| C505 | 25(4)  | 23(4) | 37(4)   | -14(3) | 10(3)  | 0(3)   |
| C515 | 42(4)  | 27(4) | 40(4)   | -11(3) | 13(3)  | -4(3)  |
| C525 | 30(4)  | 39(4) | 50(5)   | -19(4) | 13(3)  | -2(3)  |
| C416 | 10(3)  | 22(3) | 23(3)   | -7(3)  | 1(3)   | -10(2) |
| N424 | 16(3)  | 22(3) | 18(3)   | -7(2)  | -1(2)  | -2(2)  |
| C426 | 16(3)  | 23(3) | 21(3)   | -6(3)  | 2(3)   | -1(3)  |
| C436 | 19(3)  | 30(4) | 23(3)   | 0(3)   | -1(3)  | -4(3)  |
| C446 | 23(4)  | 23(4) | 39(4)   | -12(3) | -6(3)  | 2(3)   |
| C456 | 33(4)  | 13(3) | 36(4)   | -2(3)  | -6(3)  | 0(3)   |
| C466 | 23(3)  | 18(3) | 24(3)   | -2(3)  | -6(3)  | -6(3)  |
| C476 | 30(4)  | 23(3) | 13(3)   | 1(3)   | 5(3)   | -3(3)  |
| C486 | 44(5)  | 32(4) | 55(5)   | 3(4)   | 24(4)  | -5(3)  |
| C496 | 47(5)  | 48(5) | 23(4)   | -4(3)  | -2(3)  | 13(4)  |
| C506 | 39(4)  | 16(3) | 25(4)   | 1(3)   | -10(3) | -4(3)  |
| C516 | 33(4)  | 54(5) | 27(4)   | 10(3)  | -4(3)  | -13(3) |
| C526 | 41(4)  | 50(5) | 34(4)   | 8(3)   | -14(3) | -16(4) |
| C17  | 74(7)  | 35(5) | 164(12) | -21(6) | -7(7)  | -13(5) |
| C27  | 74(7)  | 35(5) | 164(12) | -21(6) | -7(7)  | -13(5) |
| C37  | 65(6)  | 27(5) | 79(7)   | -10(4) | -41(5) | -4(4)  |
| C47  | 89(11) | 38(7) | 67(9)   | 2(6)   | -9(8)  | -14(7) |
| C57  | 74(7)  | 35(5) | 164(12) | -21(6) | -7(7)  | -13(5) |



|      |         |        |         |         |         |        |
|------|---------|--------|---------|---------|---------|--------|
| C67  | 89(11)  | 38(7)  | 67(9)   | 2(6)    | -9(8)   | -14(7) |
| C77  | 65(6)   | 27(5)  | 79(7)   | -10(4)  | -41(5)  | -4(4)  |
| C87  | 37(9)   | 45(9)  | 30(8)   | -4(7)   | 0(7)    | -14(7) |
| C97  | 17(12)  | 39(7)  | 28(6)   | -10(5)  | -2(11)  | 7(11)  |
| C107 | 34(13)  | 30(7)  | 45(7)   | -13(5)  | -11(11) | 3(10)  |
| C117 | 45(12)  | 34(7)  | 38(7)   | -7(5)   | -9(11)  | 1(11)  |
| C127 | 17(12)  | 39(7)  | 28(6)   | -10(5)  | -2(11)  | 7(11)  |
| C137 | 34(13)  | 30(7)  | 45(7)   | -13(5)  | -11(11) | 3(10)  |
| C147 | 45(12)  | 34(7)  | 38(7)   | -7(5)   | -9(11)  | 1(11)  |
| C157 | 78(8)   | 86(9)  | 107(14) | -64(10) | 26(9)   | -23(7) |
| C167 | 53(7)   | 21(5)  | 59(7)   | -9(4)   | 3(6)    | -14(5) |
| C177 | 70(8)   | 49(6)  | 42(6)   | -13(4)  | -17(6)  | -10(6) |
| C187 | 70(10)  | 57(8)  | 87(10)  | -29(7)  | -18(8)  | -8(7)  |
| C197 | 91(11)  | 50(10) | 99(13)  | -31(8)  | 39(10)  | -41(8) |
| C207 | 132(13) | 56(8)  | 55(8)   | -7(6)   | -5(9)   | -52(9) |
| C217 | 63(11)  | 32(6)  | 44(6)   | 7(4)    | -22(6)  | -12(6) |
| C15' | 91(11)  | 50(10) | 99(13)  | -31(8)  | 39(10)  | -41(8) |
| C16' | 53(7)   | 21(5)  | 59(7)   | -9(4)   | 3(6)    | -14(5) |
| C17' | 63(11)  | 32(6)  | 44(6)   | 7(4)    | -22(6)  | -12(6) |
| C18' | 70(10)  | 57(8)  | 87(10)  | -29(7)  | -18(8)  | -8(7)  |
| C19' | 78(8)   | 86(9)  | 107(14) | -64(10) | 26(9)   | -23(7) |
| C20' | 132(13) | 56(8)  | 55(8)   | -7(6)   | -5(9)   | -52(9) |
| C21' | 70(8)   | 49(6)  | 42(6)   | -13(4)  | -17(6)  | -10(6) |
| C227 | 46(6)   | 34(6)  | 45(6)   | 2(5)    | 11(5)   | 5(5)   |
| C237 | 39(9)   | 33(3)  | 45(5)   | -18(3)  | -21(7)  | 15(6)  |
| C247 | 57(9)   | 24(3)  | 45(5)   | -6(3)   | -18(7)  | 9(6)   |
| C257 | 58(9)   | 21(3)  | 30(4)   | 1(3)    | -13(7)  | 18(5)  |
| C267 | 39(9)   | 33(3)  | 45(5)   | -18(3)  | -21(7)  | 15(6)  |
| C277 | 57(9)   | 24(3)  | 45(5)   | -6(3)   | -18(7)  | 9(6)   |
| C287 | 58(9)   | 21(3)  | 30(4)   | 1(3)    | -13(7)  | 18(5)  |
| C22' | 46(6)   | 34(6)  | 45(6)   | 2(5)    | 11(5)   | 5(5)   |
| C23' | 39(9)   | 33(3)  | 45(5)   | -18(3)  | -21(7)  | 15(6)  |
| C24' | 57(9)   | 24(3)  | 45(5)   | -6(3)   | -18(7)  | 9(6)   |
| C25' | 58(9)   | 21(3)  | 30(4)   | 1(3)    | -13(7)  | 18(5)  |
| C26' | 39(9)   | 33(3)  | 45(5)   | -18(3)  | -21(7)  | 15(6)  |
| C27' | 57(9)   | 24(3)  | 45(5)   | -6(3)   | -18(7)  | 9(6)   |

C28'      58(9)      21(3)      30(4)      1(3)      -13(7)      18(5)

---

Table 5. Hydrogen coordinates ( $\times 10^4$ ) and isotropic displacement parameters ( $\text{\AA}^2 \times 10^3$ ) for holkd15.

|      | x        | y        | z        | U(eq) |
|------|----------|----------|----------|-------|
| H1   | 3970(40) | 7910(20) | 1986(16) | 31    |
| H2   | 4550(40) | 7400(20) | 1605(16) | 30    |
| H31A | 7100     | 8469     | 699      | 24    |
| H61A | 6071     | 9543     | -49      | 48    |
| H61B | 6721     | 9350     | 345      | 48    |
| H61C | 5605     | 9703     | 395      | 48    |
| H71A | 4566     | 9082     | -113     | 45    |
| H71B | 4090     | 9303     | 311      | 45    |
| H71C | 4154     | 8659     | 271      | 45    |
| H81A | 6133     | 8579     | -203     | 51    |
| H81B | 5942     | 8088     | 170      | 51    |
| H81C | 6913     | 8405     | 149      | 51    |
| H91A | 9415     | 8150     | 1652     | 45    |
| H91B | 8748     | 7649     | 1732     | 45    |
| H91C | 8363     | 8196     | 1944     | 45    |
| H10A | 9506     | 8145     | 957      | 52    |
| H10B | 8555     | 8350     | 684      | 52    |
| H10C | 8712     | 7730     | 931      | 52    |
| H11A | 8809     | 9039     | 1254     | 55    |
| H11B | 7732     | 9082     | 1530     | 55    |
| H11C | 7764     | 9138     | 1036     | 55    |
| H32A | 1479     | 9212     | 856      | 28    |
| H42A | 1650     | 10129    | 871      | 31    |
| H52A | 3179     | 10343    | 1036     | 31    |
| H72A | 3460     | 8049     | 955      | 23    |
| H82A | 2486     | 8097     | 1602     | 42    |
| H82B | 2056     | 7684     | 1357     | 42    |
| H82C | 1460     | 8300     | 1373     | 42    |
| H92A | 2646     | 8380     | 325      | 43    |
| H92B | 1557     | 8412     | 592      | 43    |

|      |      |       |      |    |
|------|------|-------|------|----|
| H92C | 2258 | 7824  | 571  | 43 |
| H10D | 5511 | 9445  | 1170 | 26 |
| H11D | 4682 | 9267  | 1842 | 48 |
| H11E | 4139 | 9899  | 1813 | 48 |
| H11F | 5353 | 9755  | 1831 | 48 |
| H12A | 5104 | 10377 | 779  | 59 |
| H12B | 5824 | 10343 | 1144 | 59 |
| H12C | 4630 | 10578 | 1209 | 59 |
| H33A | 7159 | 7850  | 2951 | 35 |
| H43A | 7873 | 6924  | 2964 | 40 |
| H53A | 7876 | 6487  | 2392 | 38 |
| H73A | 6218 | 8758  | 2061 | 29 |
| H83A | 7715 | 8865  | 2370 | 60 |
| H83B | 7069 | 8806  | 2814 | 60 |
| H83C | 6755 | 9323  | 2466 | 60 |
| H93A | 4810 | 8462  | 2488 | 44 |
| H93B | 5006 | 9042  | 2601 | 44 |
| H93C | 5360 | 8473  | 2895 | 44 |
| H10E | 6785 | 7104  | 1441 | 34 |
| H11G | 8621 | 6904  | 1401 | 66 |
| H11H | 8121 | 6452  | 1224 | 66 |
| H11I | 8525 | 6312  | 1676 | 66 |
| H12D | 5822 | 6507  | 1921 | 63 |
| H12E | 6848 | 6086  | 2012 | 63 |
| H12F | 6435 | 6183  | 1563 | 63 |
| H34A | 862  | 6900  | 2179 | 24 |
| H64A | 590  | 7393  | 3457 | 34 |
| H64B | 1226 | 7837  | 3172 | 34 |
| H64C | 1800 | 7240  | 3355 | 34 |
| H74A | -566 | 7527  | 2942 | 50 |
| H74B | -231 | 7362  | 2489 | 50 |
| H74C | 60   | 7921  | 2603 | 50 |
| H84A | 355  | 6583  | 3263 | 62 |
| H84B | 1514 | 6392  | 3093 | 62 |
| H84C | 611  | 6442  | 2800 | 62 |
| H94A | 804  | 6574  | 1109 | 42 |

|      |      |      |      |    |
|------|------|------|------|----|
| H94B | 1744 | 6911 | 1097 | 42 |
| H94C | 716  | 7057 | 1388 | 42 |
| H10F | 423  | 5856 | 1741 | 51 |
| H10G | 179  | 6404 | 1960 | 51 |
| H10H | 939  | 5878 | 2155 | 51 |
| H11J | 1809 | 5681 | 1278 | 51 |
| H11K | 2496 | 5541 | 1662 | 51 |
| H11L | 2827 | 5958 | 1259 | 51 |
| H35A | 4129 | 7701 | 3523 | 30 |
| H45A | 3454 | 8624 | 3486 | 32 |
| H55A | 2434 | 9046 | 2963 | 34 |
| H75A | 3570 | 6753 | 2900 | 27 |
| H85A | 5091 | 7040 | 2578 | 74 |
| H85B | 5386 | 6498 | 2908 | 74 |
| H85C | 5463 | 7101 | 3013 | 74 |
| H95A | 3201 | 6659 | 3633 | 58 |
| H95B | 4332 | 6775 | 3677 | 58 |
| H95C | 4174 | 6227 | 3505 | 58 |
| H10I | 1604 | 8373 | 2201 | 30 |
| H11M | 425  | 8744 | 2730 | 54 |
| H11N | 371  | 9142 | 2293 | 54 |
| H11O | 960  | 9294 | 2648 | 54 |
| H12G | 3007 | 8823 | 1918 | 42 |
| H12H | 2614 | 9319 | 2184 | 42 |
| H12I | 1969 | 9232 | 1823 | 42 |
| H36A | 5377 | 5957 | 818  | 39 |
| H46A | 5770 | 5138 | 1273 | 49 |
| H56A | 5134 | 5075 | 1962 | 41 |
| H76A | 3554 | 7126 | 1025 | 31 |
| H86A | 3041 | 6471 | 647  | 55 |
| H86B | 4121 | 6457 | 374  | 55 |
| H86C | 3324 | 7020 | 351  | 55 |
| H96A | 5293 | 7270 | 935  | 56 |
| H96B | 4767 | 7479 | 511  | 56 |
| H96C | 5510 | 6897 | 570  | 56 |
| H10J | 3577 | 6149 | 2446 | 38 |

|      |          |          |          |    |
|------|----------|----------|----------|----|
| H11P | 5306     | 5775     | 2578     | 66 |
| H11Q | 5022     | 5161     | 2614     | 66 |
| H11R | 4505     | 5554     | 2946     | 66 |
| H12J | 2434     | 5566     | 2362     | 71 |
| H12K | 2889     | 5346     | 2800     | 71 |
| H12L | 3300     | 5033     | 2410     | 71 |
| H3   | 9100(40) | 2540(20) | 1314(16) | 31 |
| H4   | 8500(40) | 2970(20) | 1711(16) | 28 |
| H23A | 6331     | 1622     | 2553     | 33 |
| H26A | 3856     | 2011     | 2421     | 94 |
| H26B | 4632     | 2423     | 2477     | 94 |
| H26C | 4894     | 1770     | 2634     | 94 |
| H27A | 4445     | 1279     | 1937     | 72 |
| H27B | 5487     | 1105     | 2158     | 72 |
| H27C | 5526     | 1290     | 1665     | 72 |
| H28A | 3775     | 2215     | 1712     | 49 |
| H28B | 4767     | 2259     | 1388     | 49 |
| H28C | 4421     | 2717     | 1690     | 49 |
| H26D | 3851     | 2270     | 2434     | 94 |
| H26E | 4734     | 2651     | 2405     | 94 |
| H26F | 4867     | 2037     | 2663     | 94 |
| H27D | 4297     | 1354     | 2196     | 72 |
| H27E | 5482     | 1197     | 2275     | 72 |
| H27F | 5145     | 1273     | 1814     | 72 |
| H28D | 3745     | 2272     | 1740     | 49 |
| H28E | 4722     | 2156     | 1416     | 49 |
| H28F | 4518     | 2720     | 1613     | 49 |
| H29A | 8049     | 1310     | 3374     | 56 |
| H29B | 7311     | 1766     | 3098     | 56 |
| H29C | 8526     | 1745     | 3016     | 56 |
| H30A | 7274     | 521      | 3192     | 74 |
| H30B | 7053     | 540      | 2720     | 74 |
| H30C | 6478     | 1014     | 2980     | 74 |
| H31B | 9035     | 532      | 3099     | 60 |
| H31C | 9569     | 918      | 2722     | 60 |
| H31D | 8990     | 436      | 2630     | 60 |

|      |       |      |      |     |
|------|-------|------|------|-----|
| H23B | 5768  | 2878 | 406  | 31  |
| H24A | 5132  | 3779 | 532  | 35  |
| H25A | 5191  | 4024 | 1183 | 36  |
| H27G | 6938  | 1778 | 1143 | 32  |
| H28G | 8244  | 2165 | 720  | 44  |
| H28H | 7565  | 2321 | 334  | 44  |
| H28I | 7970  | 1683 | 497  | 44  |
| H29D | 5369  | 1719 | 875  | 60  |
| H29E | 6313  | 1355 | 651  | 60  |
| H29F | 5835  | 1948 | 419  | 60  |
| H30D | 6293  | 3147 | 2051 | 37  |
| H31E | 7320  | 3798 | 1691 | 60  |
| H31F | 6674  | 4039 | 2081 | 60  |
| H31G | 6327  | 4254 | 1624 | 60  |
| H32B | 4967  | 3744 | 2346 | 82  |
| H32C | 4455  | 3394 | 2076 | 82  |
| H32D | 4612  | 4023 | 1899 | 82  |
| H23C | 11932 | 1093 | 2069 | 37  |
| H24B | 11830 | 260  | 1848 | 44  |
| H25B | 10270 | 99   | 1660 | 44  |
| H27H | 9845  | 2154 | 2276 | 27  |
| H28J | 10479 | 1564 | 2870 | 67  |
| H28K | 10934 | 2140 | 2790 | 67  |
| H28L | 11626 | 1589 | 2663 | 67  |
| H29G | 10970 | 2362 | 1682 | 52  |
| H29H | 11925 | 2054 | 1928 | 52  |
| H29I | 11276 | 2611 | 2064 | 52  |
| H30E | 7881  | 1009 | 1741 | 47  |
| H31H | 8767  | 1045 | 1070 | 76  |
| H31I | 7853  | 680  | 1124 | 76  |
| H31J | 9013  | 380  | 1142 | 76  |
| H32E | 7426  | 120  | 1812 | 103 |
| H32F | 8041  | 150  | 2197 | 103 |
| H32G | 8599  | -159 | 1822 | 103 |
| H23D | 12219 | 3616 | 1135 | 27  |
| H26H | 12424 | 3236 | -173 | 48  |

|      |       |      |      |    |
|------|-------|------|------|----|
| H26I | 11241 | 3190 | -36  | 48 |
| H26J | 12108 | 2720 | 155  | 48 |
| H27I | 13520 | 3401 | 237  | 62 |
| H27J | 13272 | 2993 | 657  | 62 |
| H27L | 13206 | 3646 | 664  | 62 |
| H28M | 12125 | 4188 | 15   | 61 |
| H28N | 11664 | 4295 | 472  | 61 |
| H28O | 10951 | 4131 | 163  | 61 |
| H29J | 11450 | 4621 | 2174 | 48 |
| H29K | 10451 | 4321 | 2222 | 48 |
| H29L | 10646 | 4786 | 1831 | 48 |
| H30F | 12496 | 3698 | 2256 | 45 |
| H30G | 12494 | 3271 | 1937 | 45 |
| H30H | 11532 | 3377 | 2270 | 45 |
| H31K | 12768 | 4504 | 1690 | 41 |
| H31L | 12195 | 4553 | 1280 | 41 |
| H31M | 12980 | 4008 | 1418 | 41 |
| H23E | 8881  | 3098 | -258 | 31 |
| H24C | 9609  | 2204 | -334 | 40 |
| H25C | 10612 | 1668 | 154  | 35 |
| H27M | 9383  | 3864 | 509  | 29 |
| H28P | 7944  | 3473 | 811  | 75 |
| H28Q | 7523  | 3515 | 367  | 75 |
| H28R | 7570  | 4069 | 555  | 75 |
| H29M | 9640  | 4082 | -239 | 71 |
| H29N | 8714  | 4487 | -41  | 71 |
| H29O | 8482  | 3993 | -262 | 71 |
| H30I | 10720 | 1935 | 1143 | 29 |
| H31N | 11517 | 1044 | 1085 | 58 |
| H31O | 11621 | 1185 | 589  | 58 |
| H31P | 10514 | 1171 | 838  | 58 |
| H32H | 12522 | 1737 | 1125 | 49 |
| H32I | 12150 | 2383 | 974  | 49 |
| H32J | 12612 | 1980 | 640  | 49 |
| H23F | 8101  | 4205 | 2744 | 29 |
| H24D | 7557  | 5079 | 2380 | 33 |



|      |          |          |          |    |
|------|----------|----------|----------|----|
| H25D | 8005     | 5260     | 1670     | 30 |
| H27N | 9737     | 3086     | 2343     | 25 |
| H28T | 10373    | 3628     | 2785     | 46 |
| H28U | 10154    | 3029     | 3016     | 46 |
| H28V | 9358     | 3571     | 3093     | 46 |
| H29P | 7999     | 2968     | 2455     | 49 |
| H29Q | 7877     | 3249     | 2868     | 49 |
| H29R | 8590     | 2663     | 2847     | 49 |
| H30J | 9401     | 4302     | 1037     | 30 |
| H31Q | 10575    | 4873     | 1140     | 65 |
| H31R | 9690     | 5397     | 1139     | 65 |
| H31S | 10044    | 5129     | 723      | 65 |
| H32K | 7628     | 4678     | 1012     | 62 |
| H32L | 8319     | 4962     | 630      | 62 |
| H32M | 7909     | 5285     | 1015     | 62 |
| H5   | 2630(40) | 2290(20) | 4682(16) | 32 |
| H6   | 2010(40) | 2750(20) | 4961(16) | 32 |
| H43B | -244     | 1603     | 5962     | 27 |
| H46B | -2071    | 2558     | 4998     | 42 |
| H46C | -2752    | 2063     | 5093     | 42 |
| H46D | -1740    | 2015     | 4777     | 42 |
| H47A | -2190    | 1187     | 5448     | 71 |
| H47B | -1166    | 1047     | 5682     | 71 |
| H47C | -1097    | 1103     | 5187     | 71 |
| H48A | -1864    | 2482     | 5781     | 67 |
| H48B | -1681    | 1867     | 6035     | 67 |
| H48C | -2699    | 2074     | 5802     | 67 |
| H49A | 1177     | 1314     | 6816     | 47 |
| H49B | 423      | 1691     | 6500     | 47 |
| H49C | 1589     | 1794     | 6479     | 47 |
| H50A | 791      | 448      | 6608     | 52 |
| H50B | 924      | 375      | 6128     | 52 |
| H50C | 11       | 812      | 6297     | 52 |
| H51A | 2527     | 637      | 6597     | 52 |
| H51B | 2986     | 1101     | 6259     | 52 |
| H51C | 2746     | 545      | 6121     | 52 |

|      |       |      |      |    |
|------|-------|------|------|----|
| H49D | 1422  | 1382 | 6786 | 47 |
| H49E | 743   | 1826 | 6477 | 47 |
| H49F | 1964  | 1732 | 6390 | 47 |
| H50D | 463   | 618  | 6706 | 52 |
| H50E | 218   | 557  | 6251 | 52 |
| H50F | -263  | 1104 | 6449 | 52 |
| H51D | 2208  | 504  | 6612 | 52 |
| H51E | 2856  | 813  | 6226 | 52 |
| H51F | 2199  | 350  | 6156 | 52 |
| H43C | -713  | 2503 | 3761 | 27 |
| H44A | -1420 | 3406 | 3809 | 34 |
| H45B | -1304 | 3782 | 4404 | 31 |
| H47D | 384   | 1510 | 4577 | 27 |
| H48D | -1152 | 1427 | 4289 | 70 |
| H48E | -195  | 1008 | 4130 | 70 |
| H48F | -592  | 1567 | 3834 | 70 |
| H49G | 1723  | 1862 | 4136 | 74 |
| H49H | 1098  | 1908 | 3740 | 74 |
| H49I | 1509  | 1310 | 3984 | 74 |
| H50G | -175  | 3065 | 5320 | 31 |
| H51G | -2009 | 3296 | 5348 | 64 |
| H51H | -1871 | 3902 | 5105 | 64 |
| H51I | -1497 | 3712 | 5560 | 64 |
| H52B | 842   | 3669 | 4888 | 44 |
| H52C | 200   | 3985 | 5245 | 44 |
| H52D | -155  | 4108 | 4785 | 44 |
| H43D | 5349  | 883  | 5580 | 48 |
| H44B | 5178  | 3    | 5473 | 54 |
| H45C | 3619  | -170 | 5302 | 41 |
| H47E | 3345  | 2037 | 5612 | 26 |
| H48G | 4291  | 2101 | 4960 | 46 |
| H48H | 5329  | 1884 | 5177 | 46 |
| H48I | 4684  | 2472 | 5250 | 46 |
| H49J | 4141  | 1612 | 6222 | 67 |
| H49K | 4537  | 2189 | 6030 | 67 |
| H49L | 5238  | 1613 | 5963 | 67 |

|      |      |      |      |    |
|------|------|------|------|----|
| H47F | 3316 | 1986 | 5737 | 26 |
| H48J | 4536 | 2077 | 5169 | 46 |
| H48K | 5399 | 1680 | 5424 | 46 |
| H48L | 4969 | 2284 | 5544 | 46 |
| H49M | 3686 | 1494 | 6380 | 67 |
| H49N | 4523 | 1908 | 6260 | 67 |
| H49O | 4825 | 1265 | 6208 | 67 |
| H50H | 1236 | 740  | 5312 | 40 |
| H51J | 1712 | -173 | 5744 | 86 |
| H51K | 2132 | -414 | 5322 | 86 |
| H51L | 939  | -191 | 5408 | 86 |
| H52E | 2064 | 791  | 4616 | 85 |
| H52F | 1231 | 373  | 4696 | 85 |
| H52G | 2424 | 134  | 4701 | 85 |
| H50N | 1423 | 838  | 5229 | 40 |
| H51M | 676  | 310  | 5712 | 86 |
| H51N | 1301 | -252 | 5576 | 86 |
| H51O | 463  | 115  | 5292 | 86 |
| H52H | 1562 | 791  | 4628 | 85 |
| H52I | 1545 | 134  | 4722 | 85 |
| H52J | 2613 | 372  | 4662 | 85 |
| H43E | 5786 | 3302 | 4442 | 25 |
| H46E | 5939 | 2884 | 3139 | 50 |
| H46F | 4741 | 3063 | 3254 | 50 |
| H46G | 5275 | 2449 | 3419 | 50 |
| H47G | 7134 | 2685 | 3644 | 59 |
| H47H | 6486 | 2298 | 3980 | 59 |
| H47I | 6855 | 2831 | 4105 | 59 |
| H48M | 6263 | 3674 | 3362 | 55 |
| H48N | 6062 | 3779 | 3835 | 55 |
| H48O | 5127 | 3879 | 3552 | 55 |
| H49P | 6003 | 3542 | 5506 | 39 |
| H49Q | 6014 | 3093 | 5203 | 39 |
| H49R | 5042 | 3218 | 5528 | 39 |
| H50I | 6296 | 4316 | 4898 | 42 |
| H50J | 5708 | 4333 | 4495 | 42 |

|      |      |      |      |    |
|------|------|------|------|----|
| H50K | 6494 | 3795 | 4650 | 42 |
| H51P | 4986 | 4445 | 5401 | 39 |
| H51Q | 3956 | 4175 | 5432 | 39 |
| H51R | 4234 | 4620 | 5038 | 39 |
| H43F | 2221 | 2774 | 3094 | 42 |
| H44C | 2808 | 1851 | 3063 | 44 |
| H45D | 3904 | 1340 | 3528 | 39 |
| H47J | 2989 | 3574 | 3793 | 32 |
| H48P | 1491 | 3286 | 4121 | 64 |
| H48Q | 1037 | 3299 | 3688 | 64 |
| H48R | 1178 | 3868 | 3836 | 64 |
| H49S | 3232 | 3749 | 3042 | 74 |
| H49T | 2410 | 4207 | 3239 | 74 |
| H49U | 2033 | 3736 | 3035 | 74 |
| H50L | 4940 | 1861 | 4319 | 35 |
| H51S | 3518 | 1403 | 4591 | 55 |
| H51T | 4568 | 993  | 4657 | 55 |
| H51U | 3894 | 940  | 4295 | 55 |
| H52K | 5984 | 1546 | 3729 | 60 |
| H52L | 5427 | 1003 | 3804 | 60 |
| H52M | 6113 | 1111 | 4145 | 60 |
| H43G | 1589 | 4134 | 5956 | 29 |
| H44D | 1126 | 4996 | 5569 | 33 |
| H45E | 1571 | 5133 | 4860 | 33 |
| H47K | 3197 | 2965 | 5602 | 27 |
| H48S | 1441 | 2879 | 5704 | 70 |
| H48T | 1314 | 3190 | 6103 | 70 |
| H48U | 1994 | 2591 | 6110 | 70 |
| H49V | 3495 | 2937 | 6301 | 62 |
| H49W | 2805 | 3530 | 6318 | 62 |
| H49X | 3875 | 3486 | 6037 | 62 |
| H50M | 2851 | 4116 | 4253 | 32 |
| H51V | 4151 | 4619 | 4345 | 59 |
| H51W | 3357 | 5183 | 4317 | 59 |
| H51X | 3663 | 4874 | 3919 | 59 |
| H52N | 1124 | 4606 | 4238 | 61 |

|      |       |      |      |     |
|------|-------|------|------|-----|
| H52O | 1864  | 4780 | 3833 | 61  |
| H52P | 1593  | 5176 | 4184 | 61  |
| H17A | 6986  | 4962 | -295 | 135 |
| H17B | 6258  | 5315 | -630 | 135 |
| H17C | 6421  | 4650 | -573 | 135 |
| H37A | 6011  | 4961 | 450  | 65  |
| H47N | 4426  | 4995 | 846  | 78  |
| H57A | 2930  | 5020 | 526  | 108 |
| H67A | 3018  | 5012 | -190 | 78  |
| H77A | 4603  | 4978 | -586 | 65  |
| H87A | 7643  | 23   | 229  | 56  |
| H87B | 7764  | 639  | 3    | 56  |
| H87C | 7948  | 464  | 484  | 56  |
| H107 | 9635  | 888  | 109  | 43  |
| H117 | 11370 | 600  | -75  | 47  |
| H127 | 11924 | -313 | -199 | 34  |
| H137 | 10744 | -939 | -140 | 43  |
| H147 | 9009  | -651 | 45   | 47  |
| H15A | 1612  | 23   | 3886 | 129 |
| H15B | 1271  | -144 | 3476 | 129 |
| H15C | 1182  | 497  | 3527 | 129 |
| H17D | 3380  | -90  | 3909 | 62  |
| H18A | 5032  | -70  | 3576 | 82  |
| H19A | 5263  | 175  | 2855 | 94  |
| H20A | 3842  | 400  | 2466 | 92  |
| H21A | 2190  | 380  | 2800 | 55  |
| H15D | 5117  | -182 | 3537 | 117 |
| H15E | 5171  | 252  | 3117 | 117 |
| H15F | 5111  | -388 | 3099 | 117 |
| H17E | 3629  | 230  | 2668 | 55  |
| H18B | 1839  | 344  | 2713 | 82  |
| H19B | 902   | 221  | 3363 | 103 |
| H20B | 1755  | -15  | 3967 | 92  |
| H21B | 3545  | -128 | 3922 | 62  |
| H22A | 5932  | 5556 | 3455 | 67  |
| H22B | 6208  | 5258 | 3908 | 67  |

|      |       |      |      |    |
|------|-------|------|------|----|
| H22C | 6004  | 4895 | 3572 | 67 |
| H247 | 7809  | 4433 | 3845 | 51 |
| H257 | 9565  | 4341 | 3636 | 47 |
| H267 | 10220 | 5011 | 3129 | 46 |
| H277 | 9119  | 5774 | 2830 | 51 |
| H287 | 7362  | 5867 | 3039 | 47 |
| H22D | 10595 | 4717 | 3251 | 67 |
| H22E | 10515 | 5379 | 3135 | 67 |
| H22F | 10303 | 5017 | 2800 | 67 |
| H24' | 8657  | 5820 | 2862 | 51 |
| H25' | 6905  | 5874 | 3074 | 47 |
| H26' | 6308  | 5196 | 3591 | 46 |
| H27' | 7464  | 4465 | 3896 | 51 |
| H28' | 9215  | 4412 | 3684 | 47 |

---

Table 6. Torsion angles [°] for hokkd15.

|                 |           |                   |           |
|-----------------|-----------|-------------------|-----------|
| N11-Co1-Co2-N24 | 78.2(2)   | C13-N21-C41-C51   | -13.9(8)  |
| N21-Co1-Co2-N24 | -99.4(2)  | Co1-N21-C41-C51   | 175.7(4)  |
| N11-Co1-Co2-N14 | -89.9(2)  | C21-C31-C41-N21   | 20.9(9)   |
| N21-Co1-Co2-N14 | 92.4(3)   | C21-C31-C41-C51   | -155.2(6) |
| N21-Co1-N11-C21 | 34.8(4)   | N21-C41-C51-C101  | 134.0(6)  |
| Co2-Co1-N11-C21 | -143.4(3) | C31-C41-C51-C101  | -50.2(7)  |
| N21-Co1-N11-C12 | -139.8(4) | N21-C41-C51-C91   | 10.7(9)   |
| Co2-Co1-N11-C12 | 41.9(5)   | C31-C41-C51-C91   | -173.5(5) |
| N11-Co1-N21-C41 | -22.6(4)  | N21-C41-C51-C111  | -108.9(6) |
| Co2-Co1-N21-C41 | 155.5(3)  | C31-C41-C51-C111  | 66.9(6)   |
| N11-Co1-N21-C13 | 166.5(4)  | C21-N11-C12-C22   | 116.4(6)  |
| Co2-Co1-N21-C13 | -15.4(5)  | Co1-N11-C12-C22   | -69.2(6)  |
| N24-Co2-N14-C24 | -16.4(4)  | C21-N11-C12-C62   | -65.3(6)  |
| Co1-Co2-N14-C24 | 154.6(3)  | Co1-N11-C12-C62   | 109.2(5)  |
| N24-Co2-N14-C15 | 162.3(4)  | C62-C12-C22-C32   | 4.4(8)    |
| Co1-Co2-N14-C15 | -26.7(5)  | N11-C12-C22-C32   | -177.3(5) |
| N14-Co2-N24-C44 | 28.2(4)   | C62-C12-C22-C72   | -174.7(5) |
| Co1-Co2-N24-C44 | -143.1(3) | N11-C12-C22-C72   | 3.6(8)    |
| N14-Co2-N24-C16 | -142.3(4) | C12-C22-C32-C42   | -0.3(8)   |
| Co1-Co2-N24-C16 | 46.4(4)   | C72-C22-C32-C42   | 178.9(5)  |
| C12-N11-C21-C31 | 148.0(5)  | C22-C32-C42-C52   | -2.5(9)   |
| Co1-N11-C21-C31 | -27.0(7)  | C32-C42-C52-C62   | 1.1(9)    |
| C12-N11-C21-C11 | -33.1(7)  | C42-C52-C62-C12   | 3.0(8)    |
| Co1-N11-C21-C11 | 151.9(4)  | C42-C52-C62-C102  | -172.7(5) |
| C71-C11-C21-N11 | -9.4(8)   | C22-C12-C62-C52   | -5.6(7)   |
| C81-C11-C21-N11 | -128.4(6) | N11-C12-C62-C52   | 176.0(5)  |
| C61-C11-C21-N11 | 113.7(6)  | C22-C12-C62-C102  | 169.9(5)  |
| C71-C11-C21-C31 | 169.6(5)  | N11-C12-C62-C102  | -8.5(7)   |
| C81-C11-C21-C31 | 50.6(6)   | C32-C22-C72-C82   | -74.0(6)  |
| C61-C11-C21-C31 | -67.2(6)  | C12-C22-C72-C82   | 105.1(6)  |
| N11-C21-C31-C41 | -5.0(10)  | C32-C22-C72-C92   | 49.4(7)   |
| C11-C21-C31-C41 | 176.0(6)  | C12-C22-C72-C92   | -131.5(5) |
| C13-N21-C41-C31 | 170.6(5)  | C52-C62-C102-C112 | 87.4(6)   |
| Co1-N21-C41-C31 | 0.2(7)    | C12-C62-C102-C112 | -88.1(6)  |

|                   |           |                  |           |
|-------------------|-----------|------------------|-----------|
| C52-C62-C102-C122 | -34.3(7)  | C84-C14-C24-C34  | 53.0(6)   |
| C12-C62-C102-C122 | 150.2(5)  | C74-C14-C24-C34  | -65.4(6)  |
| C41-N21-C13-C63   | -85.1(6)  | N14-C24-C34-C44  | 25.0(9)   |
| Co1-N21-C13-C63   | 85.7(5)   | C14-C24-C34-C44  | -155.0(6) |
| C41-N21-C13-C23   | 98.4(6)   | C16-N24-C44-C34  | 150.9(5)  |
| Co1-N21-C13-C23   | -90.8(5)  | Co2-N24-C44-C34  | -19.5(7)  |
| C63-C13-C23-C33   | 4.0(8)    | C16-N24-C44-C54  | -34.6(8)  |
| N21-C13-C23-C33   | -179.7(5) | Co2-N24-C44-C54  | 155.0(4)  |
| C63-C13-C23-C73   | -177.5(5) | C24-C34-C44-N24  | -11.2(10) |
| N21-C13-C23-C73   | -1.2(8)   | C24-C34-C44-C54  | 173.7(6)  |
| C13-C23-C33-C43   | -0.5(8)   | N24-C44-C54-C104 | 155.1(5)  |
| C73-C23-C33-C43   | -179.1(5) | C34-C44-C54-C104 | -30.0(7)  |
| C23-C33-C43-C53   | -1.4(9)   | N24-C44-C54-C94  | -88.1(6)  |
| C33-C43-C53-C63   | -0.1(9)   | C34-C44-C54-C94  | 86.8(6)   |
| C43-C53-C63-C13   | 3.5(9)    | N24-C44-C54-C114 | 31.4(8)   |
| C43-C53-C63-C103  | -176.9(5) | C34-C44-C54-C114 | -153.7(5) |
| C23-C13-C63-C53   | -5.4(8)   | C24-N14-C15-C65  | -86.8(6)  |
| N21-C13-C63-C53   | 178.1(5)  | Co2-N14-C15-C65  | 94.5(5)   |
| C23-C13-C63-C103  | 174.9(5)  | C24-N14-C15-C25  | 94.9(6)   |
| N21-C13-C63-C103  | -1.5(8)   | Co2-N14-C15-C25  | -83.9(5)  |
| C33-C23-C73-C93   | -74.9(7)  | C65-C15-C25-C35  | 1.0(8)    |
| C13-C23-C73-C93   | 106.6(6)  | N14-C15-C25-C35  | 179.3(5)  |
| C33-C23-C73-C83   | 48.4(7)   | C65-C15-C25-C75  | -178.7(5) |
| C13-C23-C73-C83   | -130.1(6) | N14-C15-C25-C75  | -0.3(7)   |
| C53-C63-C103-C123 | 60.0(7)   | C15-C25-C35-C45  | -0.3(8)   |
| C13-C63-C103-C123 | -120.3(6) | C75-C25-C35-C45  | 179.4(5)  |
| C53-C63-C103-C113 | -62.8(7)  | C25-C35-C45-C55  | -0.8(8)   |
| C13-C63-C103-C113 | 116.9(6)  | C35-C45-C55-C65  | 1.2(8)    |
| C15-N14-C24-C34   | 176.7(5)  | C25-C15-C65-C55  | -0.6(8)   |
| Co2-N14-C24-C34   | -4.6(7)   | N14-C15-C65-C55  | -178.9(5) |
| C15-N14-C24-C14   | -3.3(8)   | C25-C15-C65-C105 | 177.6(5)  |
| Co2-N14-C24-C14   | 175.4(4)  | N14-C15-C65-C105 | -0.7(8)   |
| C64-C14-C24-N14   | -8.0(9)   | C45-C55-C65-C15  | -0.5(8)   |
| C84-C14-C24-N14   | -127.0(6) | C45-C55-C65-C105 | -178.8(5) |
| C74-C14-C24-N14   | 114.7(6)  | C35-C25-C75-C95  | 44.2(7)   |
| C64-C14-C24-C34   | 172.0(5)  | C15-C25-C75-C95  | -136.2(5) |



|                   |           |                     |           |
|-------------------|-----------|---------------------|-----------|
| C35-C25-C75-C85   | -79.7(6)  | N221-Co3-N211-C221  | 22.3(5)   |
| C15-C25-C75-C85   | 99.9(6)   | Co4-Co3-N211-C221   | -159.0(4) |
| C15-C65-C105-C125 | -106.8(6) | N221-Co3-N211-C212  | -163.2(4) |
| C55-C65-C105-C125 | 71.4(6)   | Co4-Co3-N211-C212   | 15.6(5)   |
| C15-C65-C105-C115 | 129.6(6)  | N211-Co3-N221-C241  | -33.0(4)  |
| C55-C65-C105-C115 | -52.2(7)  | Co4-Co3-N221-C241   | 148.1(3)  |
| C44-N24-C16-C66   | -72.3(7)  | N211-Co3-N221-C213  | 140.5(4)  |
| Co2-N24-C16-C66   | 98.2(5)   | Co4-Co3-N221-C213   | -38.3(5)  |
| C44-N24-C16-C26   | 108.4(6)  | N224-Co4-N214-C224  | 14.8(5)   |
| Co2-N24-C16-C26   | -81.1(6)  | Co3-Co4-N214-C224   | -157.0(4) |
| C66-C16-C26-C36   | 2.0(9)    | N224-Co4-N214-C215  | -162.1(4) |
| N24-C16-C26-C36   | -178.6(5) | Co3-Co4-N214-C215   | 26.0(5)   |
| C66-C16-C26-C76   | 178.9(5)  | N214-Co4-N224-C244  | -25.2(4)  |
| N24-C16-C26-C76   | -1.7(9)   | Co3-Co4-N224-C244   | 146.8(3)  |
| C16-C26-C36-C46   | 1.5(10)   | N214-Co4-N224-C216  | 143.1(4)  |
| C76-C26-C36-C46   | -175.6(6) | Co3-Co4-N224-C216   | -44.9(4)  |
| C26-C36-C46-C56   | -3.9(11)  | C213-N221-C241-C231 | -150.3(5) |
| C36-C46-C56-C66   | 2.7(10)   | Co3-N221-C241-C231  | 23.2(7)   |
| C46-C56-C66-C16   | 0.9(9)    | C213-N221-C241-C251 | 36.1(8)   |
| C46-C56-C66-C106  | -177.0(6) | Co3-N221-C241-C251  | -150.3(4) |
| C26-C16-C66-C56   | -3.2(9)   | C221-C231-C241-N221 | 8.9(10)   |
| N24-C16-C66-C56   | 177.4(5)  | C221-C231-C241-C251 | -177.0(6) |
| C26-C16-C66-C106  | 174.5(5)  | N221-C241-C251-C311 | -26.6(9)  |
| N24-C16-C66-C106  | -4.8(8)   | C231-C241-C251-C311 | 159.5(6)  |
| C36-C26-C76-C96   | -63.1(7)  | N221-C241-C251-C291 | 95.0(6)   |
| C16-C26-C76-C96   | 119.9(6)  | C231-C241-C251-C291 | -78.9(6)  |
| C36-C26-C76-C86   | 59.6(7)   | N221-C241-C251-C301 | -149.8(6) |
| C16-C26-C76-C86   | -117.4(6) | C231-C241-C251-C301 | 36.2(7)   |
| C56-C66-C106-C126 | -78.8(7)  | C212-N211-C221-C231 | -174.9(5) |
| C16-C66-C106-C126 | 103.4(7)  | Co3-N211-C221-C231  | -0.7(7)   |
| C56-C66-C106-C116 | 43.7(8)   | C212-N211-C221-C211 | 9.7(11)   |
| C16-C66-C106-C116 | -134.0(6) | Co3-N211-C221-C211  | -176.1(8) |
| N221-Co3-Co4-N224 | -85.1(2)  | C212-N211-C221-C21" | 0(2)      |
| N211-Co3-Co4-N224 | 96.5(3)   | Co3-N211-C221-C21"  | 174(2)    |
| N221-Co3-Co4-N214 | 84.0(2)   | C241-C231-C221-N211 | -22.1(10) |
| N211-Co3-Co4-N214 | -94.4(3)  | C241-C231-C221-C211 | 153.9(8)  |

|                     |            |                     |           |
|---------------------|------------|---------------------|-----------|
| C241-C231-C221-C21" | 162.3(18)  | C212-C262-C302-C322 | -121.6(6) |
| N211-C221-C211-C261 | -131.4(13) | C241-N221-C213-C223 | -115.1(6) |
| C231-C221-C211-C261 | 52.9(11)   | Co3-N221-C213-C223  | 71.6(6)   |
| N211-C221-C211-C281 | -7.3(16)   | C241-N221-C213-C263 | 67.4(7)   |
| C231-C221-C211-C281 | 177.1(9)   | Co3-N221-C213-C263  | -105.9(5) |
| N211-C221-C211-C271 | 111.5(13)  | C263-C213-C223-C233 | -4.1(8)   |
| C231-C221-C211-C271 | -64.1(9)   | N221-C213-C223-C233 | 178.5(5)  |
| N211-C221-C21"-C26" | -113(4)    | C263-C213-C223-C273 | 176.8(5)  |
| C231-C221-C21"-C26" | 62(3)      | N221-C213-C223-C273 | -0.6(8)   |
| N211-C221-C21"-C27" | 131(3)     | C213-C223-C233-C243 | -0.8(9)   |
| C231-C221-C21"-C27" | -54(3)     | C273-C223-C233-C243 | 178.3(5)  |
| C221-N211-C212-C262 | 86.6(7)    | C223-C233-C243-C253 | 4.1(9)    |
| Co3-N211-C212-C262  | -87.9(5)   | C233-C243-C253-C263 | -2.6(10)  |
| C221-N211-C212-C222 | -95.7(7)   | C243-C253-C263-C213 | -2.2(9)   |
| Co3-N211-C212-C222  | 89.8(6)    | C243-C253-C263-C303 | 176.0(6)  |
| C262-C212-C222-C232 | -2.2(8)    | C223-C213-C263-C253 | 5.5(8)    |
| N211-C212-C222-C232 | -179.8(5)  | N221-C213-C263-C253 | -177.0(5) |
| C262-C212-C222-C272 | 178.2(5)   | C223-C213-C263-C303 | -172.6(6) |
| N211-C212-C222-C272 | 0.6(8)     | N221-C213-C263-C303 | 4.9(8)    |
| C212-C222-C232-C242 | 2.4(8)     | C213-C223-C273-C293 | -119.6(6) |
| C272-C222-C232-C242 | -178.0(5)  | C233-C223-C273-C293 | 61.4(7)   |
| C222-C232-C242-C252 | -2.1(8)    | C213-C223-C273-C283 | 116.9(6)  |
| C232-C242-C252-C262 | 1.6(9)     | C233-C223-C273-C283 | -62.2(7)  |
| C242-C252-C262-C212 | -1.4(9)    | C253-C263-C303-C313 | -62.6(8)  |
| C242-C252-C262-C302 | 179.3(5)   | C213-C263-C303-C313 | 115.4(6)  |
| C222-C212-C262-C252 | 1.8(8)     | C253-C263-C303-C323 | 60.6(8)   |
| N211-C212-C262-C252 | 179.4(5)   | C213-C263-C303-C323 | -121.3(6) |
| C222-C212-C262-C302 | -179.0(5)  | C215-N214-C224-C234 | -179.2(5) |
| N211-C212-C262-C302 | -1.3(8)    | Co4-N214-C224-C234  | 3.9(8)    |
| C232-C222-C272-C282 | 71.6(7)    | C215-N214-C224-C214 | 6.3(9)    |
| C212-C222-C272-C282 | -108.8(6)  | Co4-N214-C224-C214  | -170.5(4) |
| C232-C222-C272-C292 | -50.5(7)   | C274-C214-C224-N214 | -140.3(6) |
| C212-C222-C272-C292 | 129.1(6)   | C264-C214-C224-N214 | -18.3(9)  |
| C252-C262-C302-C312 | -64.4(7)   | C284-C214-C224-N214 | 102.9(7)  |
| C212-C262-C302-C312 | 116.3(6)   | C274-C214-C224-C234 | 44.8(7)   |
| C252-C262-C302-C322 | 57.6(8)    | C264-C214-C224-C234 | 166.8(5)  |

|                     |           |                     |           |
|---------------------|-----------|---------------------|-----------|
| C284-C214-C224-C234 | -71.9(6)  | C215-C225-C275-C295 | 140.3(6)  |
| N214-C224-C234-C244 | -22.5(10) | C255-C265-C305-C315 | -13.9(7)  |
| C214-C224-C234-C244 | 152.8(6)  | C215-C265-C305-C315 | 163.3(5)  |
| C216-N224-C244-C234 | -151.0(5) | C255-C265-C305-C325 | 111.6(6)  |
| Co4-N224-C244-C234  | 17.4(7)   | C215-C265-C305-C325 | -71.1(7)  |
| C216-N224-C244-C254 | 36.4(7)   | C244-N224-C216-C226 | -109.2(6) |
| Co4-N224-C244-C254  | -155.2(4) | Co4-N224-C216-C226  | 82.3(6)   |
| C224-C234-C244-N224 | 10.3(10)  | C244-N224-C216-C266 | 72.5(7)   |
| C224-C234-C244-C254 | -176.5(6) | Co4-N224-C216-C266  | -96.0(5)  |
| N224-C244-C254-C304 | 84.5(6)   | C266-C216-C226-C236 | -6.5(8)   |
| C234-C244-C254-C304 | -88.5(6)  | N224-C216-C226-C236 | 175.2(5)  |
| N224-C244-C254-C314 | -159.6(5) | C266-C216-C226-C276 | 176.5(5)  |
| C234-C244-C254-C314 | 27.3(7)   | N224-C216-C226-C276 | -1.8(8)   |
| N224-C244-C254-C294 | -36.8(8)  | C216-C226-C236-C246 | 2.7(9)    |
| C234-C244-C254-C294 | 150.1(5)  | C276-C226-C236-C246 | 179.9(5)  |
| C224-N214-C215-C225 | -89.7(6)  | C226-C236-C246-C256 | 1.6(9)    |
| Co4-N214-C215-C225  | 87.4(5)   | C236-C246-C256-C266 | -2.1(9)   |
| C224-N214-C215-C265 | 90.6(6)   | C246-C256-C266-C216 | -1.6(9)   |
| Co4-N214-C215-C265  | -92.3(5)  | C246-C256-C266-C306 | 177.6(6)  |
| C265-C215-C225-C235 | -6.0(8)   | C226-C216-C266-C256 | 6.0(8)    |
| N214-C215-C225-C235 | 174.3(5)  | N224-C216-C266-C256 | -175.6(5) |
| C265-C215-C225-C275 | 173.7(5)  | C226-C216-C266-C306 | -173.2(5) |
| N214-C215-C225-C275 | -6.1(8)   | N224-C216-C266-C306 | 5.2(8)    |
| C215-C225-C235-C245 | 1.8(8)    | C236-C226-C276-C296 | 64.5(7)   |
| C275-C225-C235-C245 | -177.9(5) | C216-C226-C276-C296 | -118.4(6) |
| C225-C235-C245-C255 | 1.5(9)    | C236-C226-C276-C286 | -58.5(7)  |
| C235-C245-C255-C265 | -0.8(9)   | C216-C226-C276-C286 | 118.5(6)  |
| C245-C255-C265-C215 | -3.2(8)   | C256-C266-C306-C316 | 77.6(7)   |
| C245-C255-C265-C305 | 174.2(5)  | C216-C266-C306-C316 | -103.2(7) |
| C225-C215-C265-C255 | 6.7(8)    | C256-C266-C306-C326 | -44.8(8)  |
| N214-C215-C265-C255 | -173.6(5) | C216-C266-C306-C326 | 134.3(6)  |
| C225-C215-C265-C305 | -170.7(5) | N421-Co5-Co6-N414   | -82.6(2)  |
| N214-C215-C265-C305 | 9.0(7)    | N411-Co5-Co6-N414   | 94.9(3)   |
| C235-C225-C275-C285 | 82.7(7)   | N421-Co5-Co6-N424   | 86.2(3)   |
| C215-C225-C275-C285 | -97.0(7)  | N411-Co5-Co6-N424   | -96.3(2)  |
| C235-C225-C275-C295 | -40.0(7)  | N421-Co5-N411-C421  | 21.8(4)   |

|                     |            |                     |            |
|---------------------|------------|---------------------|------------|
| Co6-Co5-N411-C421   | -156.2(3)  | N421-C441-C451-C501 | -130.3(11) |
| N421-Co5-N411-C412  | -163.9(4)  | C431-C441-C451-C501 | 55.6(15)   |
| Co6-Co5-N411-C412   | 18.1(4)    | N421-C441-C45"-C49" | 90.9(17)   |
| N411-Co5-N421-C441  | -32.7(4)   | C431-C441-C45"-C49" | -84.6(14)  |
| Co6-Co5-N421-C441   | 145.5(3)   | N421-C441-C45"-C51" | -27(2)     |
| N411-Co5-N421-C413  | 141.0(4)   | C431-C441-C45"-C51" | 157.2(14)  |
| Co6-Co5-N421-C413   | -40.8(5)   | N421-C441-C45"-C50" | -152.2(13) |
| N424-Co6-N414-C444  | -30.4(4)   | C431-C441-C45"-C50" | 32.3(19)   |
| Co5-Co6-N414-C444   | 141.3(3)   | C421-N411-C412-C462 | 84.9(7)    |
| N424-Co6-N414-C416  | 144.8(4)   | Co5-N411-C412-C462  | -89.3(5)   |
| Co5-Co6-N414-C416   | -43.5(5)   | C421-N411-C412-C422 | -96.8(6)   |
| C412-N411-C421-C431 | -174.0(5)  | Co5-N411-C412-C422  | 89.0(5)    |
| Co5-N411-C421-C431  | -0.1(7)    | C462-C412-C422-C432 | -3.1(8)    |
| C412-N411-C421-C411 | 8.9(9)     | N411-C412-C422-C432 | 178.6(5)   |
| Co5-N411-C421-C411  | -177.2(4)  | C462-C412-C422-C472 | 178.7(5)   |
| C481-C411-C421-N411 | -125.3(6)  | N411-C412-C422-C472 | 0.4(8)     |
| C461-C411-C421-N411 | -1.6(9)    | C412-C422-C432-C442 | 0.8(8)     |
| C471-C411-C421-N411 | 116.6(6)   | C472-C422-C432-C442 | 179.0(5)   |
| C481-C411-C421-C431 | 57.4(7)    | C422-C432-C442-C452 | 1.2(9)     |
| C461-C411-C421-C431 | -178.9(5)  | C432-C442-C452-C462 | -1.0(9)    |
| C471-C411-C421-C431 | -60.6(6)   | C442-C452-C462-C412 | -1.3(8)    |
| N411-C421-C431-C441 | -22.5(10)  | C442-C452-C462-C502 | 179.7(5)   |
| C411-C421-C431-C441 | 154.9(6)   | C422-C412-C462-C452 | 3.4(8)     |
| C413-N421-C441-C431 | -151.0(5)  | N411-C412-C462-C452 | -178.3(5)  |
| Co5-N421-C441-C431  | 22.9(7)    | C422-C412-C462-C502 | -177.7(5)  |
| C413-N421-C441-C451 | 35.2(12)   | N411-C412-C462-C502 | 0.6(8)     |
| Co5-N421-C441-C451  | -150.8(10) | C432-C422-C472-C482 | -46.1(7)   |
| C413-N421-C441-C45" | 33.9(13)   | C412-C422-C472-C482 | 132.0(6)   |
| Co5-N421-C441-C45"  | -152.1(12) | C432-C422-C472-C492 | 75.2(7)    |
| C421-C431-C441-N421 | 9.2(10)    | C412-C422-C472-C492 | -106.6(6)  |
| C421-C431-C441-C451 | -176.7(10) | C452-C462-C502-C522 | -64.2(7)   |
| C421-C431-C441-C45" | -174.9(11) | C412-C462-C502-C522 | 116.9(6)   |
| N421-C441-C451-C491 | 112.3(14)  | C452-C462-C502-C512 | 58.0(7)    |
| C431-C441-C451-C491 | -61.7(15)  | C412-C462-C502-C512 | -120.9(6)  |
| N421-C441-C451-C511 | -9(2)      | C441-N421-C413-C423 | -115.5(6)  |
| C431-C441-C451-C511 | 176.9(14)  | Co5-N421-C413-C423  | 70.9(6)    |

|                     |            |                     |           |
|---------------------|------------|---------------------|-----------|
| C441-N421-C413-C463 | 64.8(7)    | C474-C414-C424-C434 | 66.7(6)   |
| Co5-N421-C413-C463  | -108.8(5)  | N424-C424-C434-C444 | -24.3(10) |
| C463-C413-C423-C433 | -3.8(9)    | C414-C424-C434-C444 | 155.2(6)  |
| N421-C413-C423-C433 | 176.5(5)   | C416-N414-C444-C434 | -155.7(5) |
| C463-C413-C423-C47' | -163.4(14) | Co6-N414-C444-C434  | 19.4(7)   |
| N421-C413-C423-C47' | 16.9(16)   | C416-N414-C444-C454 | 31.4(8)   |
| C463-C413-C423-C473 | 172.6(6)   | Co6-N414-C444-C454  | -153.5(4) |
| N421-C413-C423-C473 | -7.1(9)    | C424-C434-C444-N414 | 12.5(10)  |
| C413-C423-C433-C443 | 0.3(10)    | C424-C434-C444-C454 | -173.9(6) |
| C47'-C423-C433-C443 | 161.2(14)  | N414-C444-C454-C494 | 89.8(6)   |
| C473-C423-C433-C443 | -176.2(7)  | C434-C444-C454-C494 | -83.6(6)  |
| C423-C433-C443-C453 | 3.1(11)    | N414-C444-C454-C514 | -31.0(8)  |
| C433-C443-C453-C463 | -3.1(10)   | C434-C444-C454-C514 | 155.5(5)  |
| C443-C453-C463-C413 | -0.4(9)    | N414-C444-C454-C504 | -153.8(5) |
| C443-C453-C463-C503 | 176.6(6)   | C434-C444-C454-C504 | 32.7(7)   |
| C423-C413-C463-C453 | 3.8(8)     | C465-C415-C425-C435 | -2.3(8)   |
| N421-C413-C463-C453 | -176.5(5)  | N424-C415-C425-C435 | -179.8(5) |
| C423-C413-C463-C503 | -173.1(5)  | C465-C415-C425-C475 | 177.6(5)  |
| N421-C413-C463-C503 | 6.6(8)     | N424-C415-C425-C475 | 0.0(8)    |
| C433-C423-C473-C483 | 69.8(8)    | C415-C425-C435-C445 | 1.3(8)    |
| C413-C423-C473-C483 | -106.6(8)  | C475-C425-C435-C445 | -178.6(5) |
| C433-C423-C473-C493 | -56.6(9)   | C425-C435-C445-C455 | -0.3(9)   |
| C413-C423-C473-C493 | 127.1(8)   | C435-C445-C455-C465 | 0.3(9)    |
| C433-C423-C47'-C48' | 68(2)      | C445-C455-C465-C415 | -1.3(8)   |
| C413-C423-C47'-C48' | -132.0(18) | C445-C455-C465-C505 | -180.0(5) |
| C433-C423-C47'-C49' | -53(3)     | C425-C415-C465-C455 | 2.3(8)    |
| C413-C423-C47'-C49' | 108(3)     | N424-C415-C465-C455 | 179.8(5)  |
| C453-C463-C503-C523 | -71.6(8)   | C425-C415-C465-C505 | -179.1(5) |
| C413-C463-C503-C523 | 105.3(7)   | N424-C415-C465-C505 | -1.6(8)   |
| C453-C463-C503-C513 | 44.4(9)    | C435-C425-C475-C485 | 79.4(7)   |
| C413-C463-C503-C513 | -138.6(7)  | C415-C425-C475-C485 | -100.5(6) |
| C484-C414-C424-N424 | 127.5(6)   | C435-C425-C475-C495 | -44.3(7)  |
| C464-C414-C424-N424 | 7.3(9)     | C415-C425-C475-C495 | 135.8(6)  |
| C474-C414-C424-N424 | -113.8(6)  | C455-C465-C505-C515 | -72.5(6)  |
| C484-C414-C424-C434 | -52.0(7)   | C415-C465-C505-C515 | 108.9(6)  |
| C464-C414-C424-C434 | -172.2(6)  | C455-C465-C505-C525 | 50.3(7)   |

|                     |           |                     |            |
|---------------------|-----------|---------------------|------------|
| C415-C465-C505-C525 | -128.3(6) | C416-C466-C506-C526 | 138.3(6)   |
| C444-N414-C416-C426 | -106.1(6) | C456-C466-C506-C516 | 82.9(7)    |
| Co6-N414-C416-C426  | 78.9(6)   | C416-C466-C506-C516 | -99.4(6)   |
| C444-N414-C416-C466 | 74.6(7)   | C77-C27-C37-C47     | 0.0        |
| Co6-N414-C416-C466  | -100.5(5) | C17-C27-C37-C47     | 177(2)     |
| C434-C424-N424-C415 | 178.9(5)  | C27-C37-C47-C57     | 0.0        |
| C414-C424-N424-C415 | -0.5(9)   | C37-C47-C57-C67     | 0.0        |
| C434-C424-N424-Co6  | 0.8(8)    | C47-C57-C67-C77     | 0.0        |
| C414-C424-N424-Co6  | -178.6(4) | C57-C67-C77-C27     | 0.0        |
| C465-C415-N424-C424 | 87.6(7)   | C37-C27-C77-C67     | 0.0        |
| C425-C415-N424-C424 | -94.8(6)  | C17-C27-C77-C67     | -177.3(17) |
| C465-C415-N424-Co6  | -94.2(5)  | C147-C97-C107-C117  | 0.0        |
| C425-C415-N424-Co6  | 83.4(5)   | C87-C97-C107-C117   | -179.8(15) |
| N414-Co6-N424-C424  | 20.6(5)   | C97-C107-C117-C127  | 0.0        |
| Co5-Co6-N424-C424   | -151.0(4) | C107-C117-C127-C137 | 0.0        |
| N414-Co6-N424-C415  | -157.6(4) | C117-C127-C137-C147 | 0.0        |
| Co5-Co6-N424-C415   | 30.8(5)   | C127-C137-C147-C97  | 0.0        |
| C466-C416-C426-C436 | -6.0(8)   | C107-C97-C147-C137  | 0.0        |
| N414-C416-C426-C436 | 174.7(5)  | C87-C97-C147-C137   | 179.8(15)  |
| C466-C416-C426-C476 | 176.7(5)  | C217-C167-C177-C187 | 0.0        |
| N414-C416-C426-C476 | -2.6(8)   | C157-C167-C177-C187 | 179.3(9)   |
| C416-C426-C436-C446 | 1.7(9)    | C167-C177-C187-C197 | 0.0        |
| C476-C426-C436-C446 | 179.1(5)  | C177-C187-C197-C207 | 0.0        |
| C426-C436-C446-C456 | 2.8(9)    | C187-C197-C207-C217 | 0.0        |
| C436-C446-C456-C466 | -3.0(9)   | C197-C207-C217-C167 | 0.0        |
| C446-C456-C466-C416 | -1.3(9)   | C177-C167-C217-C207 | 0.0        |
| C446-C456-C466-C506 | 176.5(5)  | C157-C167-C217-C207 | -179.3(8)  |
| C426-C416-C466-C456 | 5.8(8)    | C21'-C16'-C17'-C18' | 0.0        |
| N414-C416-C466-C456 | -174.8(5) | C15'-C16'-C17'-C18' | 175(2)     |
| C426-C416-C466-C506 | -171.9(5) | C16'-C17'-C18'-C19' | 0.0        |
| N414-C416-C466-C506 | 7.5(8)    | C17'-C18'-C19'-C20' | 0.0        |
| C436-C426-C476-C486 | 64.7(7)   | C18'-C19'-C20'-C21' | 0.0        |
| C416-C426-C476-C486 | -117.9(6) | C19'-C20'-C21'-C16' | 0.0        |
| C436-C426-C476-C496 | -56.8(7)  | C17'-C16'-C21'-C20' | 0.0        |
| C416-C426-C476-C496 | 120.6(6)  | C15'-C16'-C21'-C20' | -175(2)    |
| C456-C466-C506-C526 | -39.4(8)  | C287-C237-C247-C257 | 0.0        |

|                     |            |
|---------------------|------------|
| C227-C237-C247-C257 | -177.7(9)  |
| C237-C247-C257-C267 | 0.0        |
| C247-C257-C267-C277 | 0.0        |
| C257-C267-C277-C287 | 0.0        |
| C267-C277-C287-C237 | 0.0        |
| C247-C237-C287-C277 | 0.0        |
| C227-C237-C287-C277 | 177.6(10)  |
| C28'-C23'-C24'-C25' | 0.0        |
| C22'-C23'-C24'-C25' | 175.7(15)  |
| C23'-C24'-C25'-C26' | 0.0        |
| C24'-C25'-C26'-C27' | 0.0        |
| C25'-C26'-C27'-C28' | 0.0        |
| C26'-C27'-C28'-C23' | 0.0        |
| C24'-C23'-C28'-C27' | 0.0        |
| C22'-C23'-C28'-C27' | -175.7(15) |

REFERENCE NUMBER: holkd18

CRYSTAL STRUCTURE REPORT

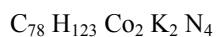

or

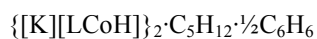

Report prepared for:

K. Ding, Prof. P. Holland

December 21, 2007

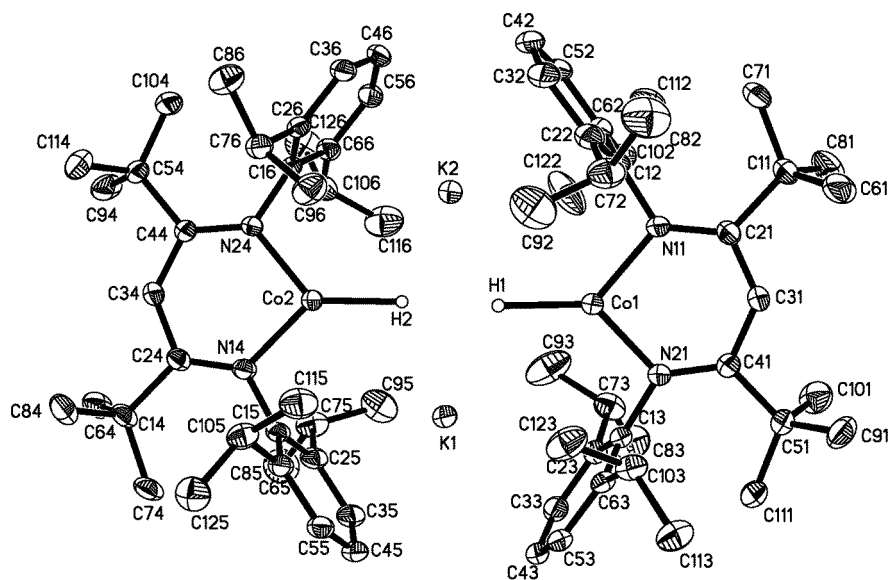

William W. Brennessel

X-ray Crystallographic Facility

Department of Chemistry

University of Rochester

120 Trustee Road

Rochester, NY 14627



### Data collection

A crystal (0.24 x 0.22 x 0.16 mm<sup>3</sup>) was placed onto the tip of a 0.1 mm diameter glass capillary tube or fiber and mounted on a Bruker SMART APEX II CCD Platform diffractometer for a data collection at 100.0(1) K.<sup>1</sup> A preliminary set of cell constants and an orientation matrix were calculated from 457 reflections harvested from three sets of 20 frames. These initial sets of frames were oriented such that orthogonal wedges of reciprocal space were surveyed. The data collection was carried out using MoK $\alpha$  radiation (graphite monochromator) with a frame time of 45 seconds and a detector distance of 5.02 cm. A randomly oriented region of reciprocal space was surveyed: four major sections of frames were collected with 0.50° steps in  $\omega$  at four different  $\phi$  settings and a detector position of -33° in  $2\theta$ . The intensity data were corrected for absorption.<sup>2</sup> Final cell constants were calculated from the xyz centroids of 9997 strong reflections from the actual data collection after integration.<sup>3</sup> See Table 1 for additional crystal and refinement information.

### Structure solution and refinement

The structure was solved using SIR97<sup>4</sup> and refined using SHELXL-97.<sup>5</sup> The space group *P*-1 was determined based on the lack of systematic absences and intensity statistics. A direct-methods solution was calculated which provided most non-hydrogen atoms from the E-map. Full-matrix least squares / difference Fourier cycles were performed which located the remaining non-hydrogen atoms. All non-hydrogen atoms were refined with anisotropic displacement parameters. All carbon-bonded hydrogen atoms were placed in ideal positions and refined as riding atoms with relative isotropic displacement parameters. The two unique cobalt hydride atoms were found from the difference Fourier map and their positions were refined independently from the cobalt atoms, with relative isotropic displacement parameters (twice the value of those of the bonded cobalt atoms). The final full matrix least squares refinement converged to  $R1 = 0.0467$  ( $F^2$ ,  $I > 2\sigma(I)$ ) and  $wR2 = 0.1267$  ( $F^2$ , all data).

### Structure description

The structure is the one suggested. Per asymmetric unit are two three-coordinate cobalt hydride molecules that form a dinuclear unit via Ph-K-Ph linkages, one co-crystallized pentane solvent molecule, and one half of a co-crystallized benzene solvent molecule. The former two species lie in general positions, while the benzene molecule coincides with a crystallographic inversion center. The angle between N-Co-N planes is 16.69(6)°.

Data collection, structure solution, and structure refinement were conducted at the X-ray Crystallographic Facility, B51 Hutchison Hall, Department of Chemistry, University of Rochester. All publications arising from this report MUST either 1) include William W. Brennessel as a coauthor or 2) acknowledge William W. Brennessel and the X-ray Crystallographic Facility of the Department of Chemistry at the University of Rochester.

- 
- <sup>1</sup> *APEX2*, version 2.1-0; Bruker AXS: Madison, WI, 2006.
- <sup>2</sup> Sheldrick, G. M. *SADABS*, version 2007/2; University of Göttingen: Göttingen, Germany, 2004.
- <sup>3</sup> *SAINTE*, version 7.34A; Bruker AXS: Madison, WI, 2006.
- <sup>4</sup> Altomare, A.; Burla, M. C.; Camalli, M.; Casciarano, G. L.; Giacovazzo, C.; Guagliardi, A.; Moliterni, A. G. G.; Polidori, G.; Spagna, R. *SIR97: A new program for solving and refining crystal structures*; Istituto di Cristallografia, CNR: Bari, Italy, 1999.
- <sup>5</sup> Sheldrick, G. M. *Acta. Cryst.* **2008**, *A64*, 112-122.

Some equations of interest:

$$R_{\text{int}} = \frac{\sum |F_o^2 - \langle F_o^2 \rangle|}{\sum |F_o^2|}$$

$$R1 = \frac{\sum ||F_o| - |F_c||}{\sum |F_o|}$$

$$wR2 = \left[ \frac{\sum [w(F_o^2 - F_c^2)^2]}{\sum [w(F_o^2)^2]} \right]^{1/2}$$

where  $w = 1 / [\sigma^2(F_o^2) + (aP)^2 + bP]$  and

$$P = 1/3 \max(0, F_o^2) + 2/3 F_c^2$$

$$\text{GOF} = S = \left[ \frac{\sum [w(F_o^2 - F_c^2)^2]}{(m-n)} \right]^{1/2}$$

where  $m$  = number of reflections and  $n$  = number of parameters

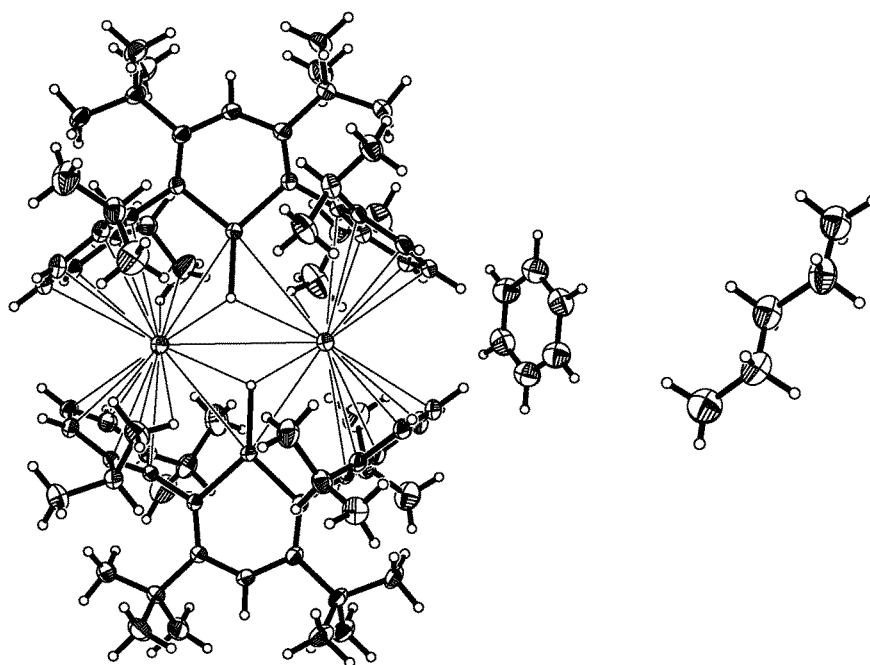

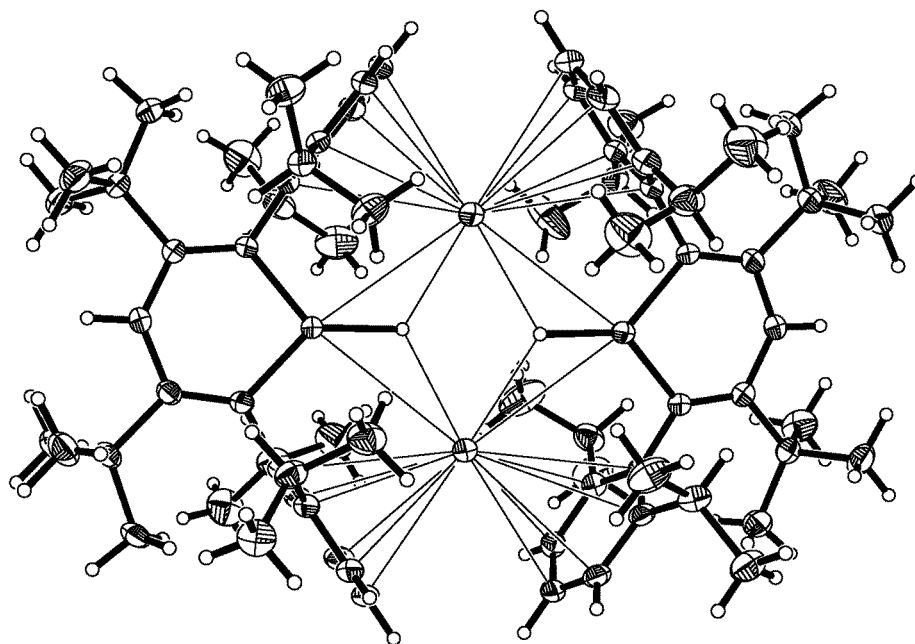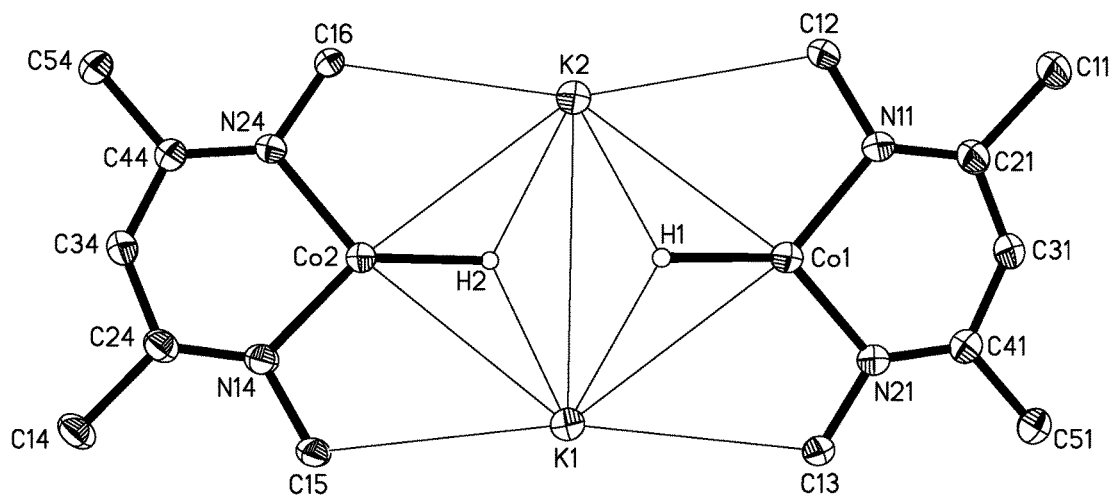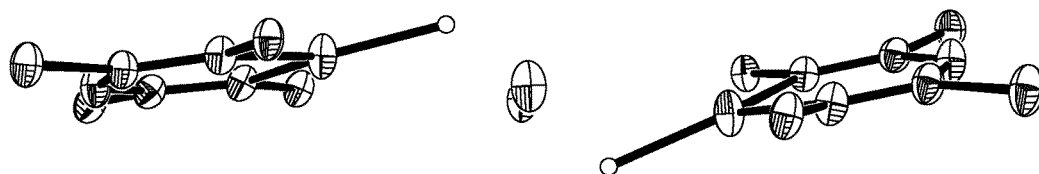

Table 1. Crystal data and structure refinement for holkd18.

|                                                     |                                                              |                            |
|-----------------------------------------------------|--------------------------------------------------------------|----------------------------|
| Identification code                                 | holkd18                                                      |                            |
| Empirical formula                                   | C78 H123 Co2 K2 N4                                           |                            |
| Formula weight                                      | 1312.86                                                      |                            |
| Temperature                                         | 100.0(1) K                                                   |                            |
| Wavelength                                          | 0.71073 Å                                                    |                            |
| Crystal system                                      | Triclinic                                                    |                            |
| Space group                                         | <i>P</i> -1                                                  |                            |
| Unit cell dimensions                                | $a = 14.078(2)$ Å                                            | $\alpha = 75.232(2)^\circ$ |
|                                                     | $b = 15.470(2)$ Å                                            | $\beta = 69.676(2)^\circ$  |
|                                                     | $c = 19.469(3)$ Å                                            | $\gamma = 77.776(2)^\circ$ |
| Volume                                              | 3809.2(9) Å <sup>3</sup>                                     |                            |
| <i>Z</i>                                            | 2                                                            |                            |
| Density (calculated)                                | 1.145 Mg/m <sup>3</sup>                                      |                            |
| Absorption coefficient                              | 0.587 mm <sup>-1</sup>                                       |                            |
| <i>F</i> (000)                                      | 1422                                                         |                            |
| Crystal color, morphology                           | deep orange, block                                           |                            |
| Crystal size                                        | 0.24 x 0.22 x 0.16 mm <sup>3</sup>                           |                            |
| Theta range for data collection                     | 1.62 to 32.03°                                               |                            |
| Index ranges                                        | $-21 \leq h \leq 20, -23 \leq k \leq 23, -29 \leq l \leq 29$ |                            |
| Reflections collected                               | 67910                                                        |                            |
| Independent reflections                             | 26214 [ <i>R</i> (int) = 0.0403]                             |                            |
| Observed reflections                                | 16754                                                        |                            |
| Completeness to theta = 32.03°                      | 98.9%                                                        |                            |
| Absorption correction                               | Multi-scan                                                   |                            |
| Max. and min. transmission                          | 0.9120 and 0.8720                                            |                            |
| Refinement method                                   | Full-matrix least-squares on <i>F</i> <sup>2</sup>           |                            |
| Data / restraints / parameters                      | 26214 / 0 / 811                                              |                            |
| Goodness-of-fit on <i>F</i> <sup>2</sup>            | 1.026                                                        |                            |
| Final <i>R</i> indices [ <i>I</i> > 2σ( <i>I</i> )] | <i>R</i> 1 = 0.0467, <i>wR</i> 2 = 0.1106                    |                            |
| <i>R</i> indices (all data)                         | <i>R</i> 1 = 0.0865, <i>wR</i> 2 = 0.1267                    |                            |
| Largest diff. peak and hole                         | 1.328 and -0.424 e.Å <sup>-3</sup>                           |                            |

Table 2. Atomic coordinates ( $\times 10^4$ ) and equivalent isotropic displacement parameters ( $\text{\AA}^2 \times 10^3$ ) for holkd18.  $U_{\text{eq}}$  is defined as one third of the trace of the orthogonalized  $U_{ij}$  tensor.

|      | x        | y       | z       | $U_{\text{eq}}$ |
|------|----------|---------|---------|-----------------|
| Co1  | -778(1)  | 3388(1) | 7752(1) | 26(1)           |
| Co2  | 2276(1)  | 329(1)  | 7159(1) | 25(1)           |
| K1   | 1946(1)  | 2630(1) | 7392(1) | 29(1)           |
| K2   | -435(1)  | 1084(1) | 7642(1) | 29(1)           |
| N11  | -2195(1) | 3538(1) | 7827(1) | 23(1)           |
| N21  | -590(1)  | 4631(1) | 7367(1) | 22(1)           |
| N14  | 3638(1)  | 80(1)   | 7216(1) | 22(1)           |
| N24  | 2107(1)  | -893(1) | 7249(1) | 20(1)           |
| C11  | -3958(1) | 4484(1) | 7876(1) | 31(1)           |
| C21  | -2771(1) | 4335(1) | 7706(1) | 25(1)           |
| C31  | -2330(1) | 5137(1) | 7441(1) | 27(1)           |
| C41  | -1320(1) | 5312(1) | 7265(1) | 23(1)           |
| C51  | -1187(1) | 6331(1) | 6976(1) | 26(1)           |
| C61  | -4437(2) | 5032(2) | 8499(1) | 48(1)           |
| C71  | -4487(1) | 3640(1) | 8130(1) | 40(1)           |
| C81  | -4225(2) | 5018(2) | 7167(2) | 52(1)           |
| C91  | -1870(2) | 6859(1) | 7583(1) | 39(1)           |
| C101 | -1516(2) | 6681(1) | 6268(1) | 43(1)           |
| C111 | -113(2)  | 6571(1) | 6779(1) | 38(1)           |
| C12  | -2488(1) | 2663(1) | 7985(1) | 24(1)           |
| C22  | -2701(1) | 2147(1) | 8722(1) | 30(1)           |
| C32  | -2897(1) | 1261(1) | 8846(1) | 35(1)           |
| C42  | -2911(1) | 890(1)  | 8276(1) | 35(1)           |
| C52  | -2697(1) | 1396(1) | 7558(1) | 31(1)           |
| C62  | -2471(1) | 2278(1) | 7395(1) | 26(1)           |
| C72  | -2725(2) | 2514(1) | 9378(1) | 37(1)           |
| C82  | -3764(2) | 2508(2) | 9987(1) | 56(1)           |
| C92  | -1887(2) | 2004(2) | 9715(1) | 57(1)           |
| C102 | -2162(1) | 2777(1) | 6585(1) | 30(1)           |
| C112 | -2834(2) | 2688(2) | 6149(1) | 44(1)           |
| C122 | -1054(2) | 2434(2) | 6186(1) | 71(1)           |

|      |         |          |         |       |
|------|---------|----------|---------|-------|
| C13  | 458(1)  | 4679(1)  | 7237(1) | 22(1) |
| C23  | 1183(1) | 4618(1)  | 6528(1) | 25(1) |
| C33  | 2212(1) | 4604(1)  | 6436(1) | 29(1) |
| C43  | 2543(1) | 4631(1)  | 7020(1) | 29(1) |
| C53  | 1826(1) | 4666(1)  | 7720(1) | 27(1) |
| C63  | 789(1)  | 4699(1)  | 7841(1) | 23(1) |
| C73  | 857(2)  | 4541(1)  | 5880(1) | 34(1) |
| C83  | 1320(2) | 5171(2)  | 5152(1) | 53(1) |
| C93  | 1157(2) | 3570(2)  | 5758(1) | 60(1) |
| C103 | 29(1)   | 4759(1)  | 8611(1) | 29(1) |
| C113 | 118(2)  | 5565(1)  | 8892(1) | 37(1) |
| C123 | 149(2)  | 3884(1)  | 9172(1) | 43(1) |
| C14  | 5349(1) | -930(1)  | 7245(1) | 26(1) |
| C24  | 4205(1) | -730(1)  | 7264(1) | 22(1) |
| C34  | 3781(1) | -1501(1) | 7320(1) | 24(1) |
| C44  | 2819(1) | -1611(1) | 7310(1) | 21(1) |
| C54  | 2709(1) | -2607(1) | 7350(1) | 25(1) |
| C64  | 5979(1) | -1387(1) | 6577(1) | 36(1) |
| C74  | 5878(1) | -118(1)  | 7151(1) | 33(1) |
| C84  | 5429(2) | -1576(1) | 7978(1) | 36(1) |
| C94  | 3561(2) | -2962(1) | 6699(1) | 39(1) |
| C104 | 1709(1) | -2768(1) | 7299(1) | 35(1) |
| C114 | 2828(2) | -3190(1) | 8095(1) | 39(1) |
| C15  | 3933(1) | 918(1)   | 7180(1) | 23(1) |
| C25  | 4230(1) | 1517(1)  | 6479(1) | 26(1) |
| C35  | 4431(1) | 2365(1)  | 6461(1) | 30(1) |
| C45  | 4348(1) | 2634(1)  | 7108(1) | 28(1) |
| C55  | 4046(1) | 2054(1)  | 7791(1) | 27(1) |
| C65  | 3828(1) | 1193(1)  | 7843(1) | 23(1) |
| C75  | 4327(2) | 1251(1)  | 5753(1) | 35(1) |
| C85  | 5428(2) | 1206(2)  | 5224(1) | 48(1) |
| C95  | 3604(2) | 1907(2)  | 5363(1) | 48(1) |
| C105 | 3463(1) | 592(1)   | 8609(1) | 29(1) |
| C115 | 2369(2) | 957(2)   | 9032(1) | 38(1) |
| C125 | 4173(2) | 485(2)   | 9077(1) | 38(1) |
| C16  | 1087(1) | -887(1)  | 7265(1) | 21(1) |

|      |         |          |          |       |
|------|---------|----------|----------|-------|
| C26  | 301(1)  | -1030(1) | 7960(1)  | 22(1) |
| C36  | -703(1) | -949(1)  | 7959(1)  | 26(1) |
| C46  | -952(1) | -719(1)  | 7300(1)  | 29(1) |
| C56  | -186(1) | -567(1)  | 6625(1)  | 28(1) |
| C66  | 836(1)  | -648(1)  | 6589(1)  | 24(1) |
| C76  | 535(1)  | -1238(1) | 8696(1)  | 26(1) |
| C86  | -53(2)  | -1975(1) | 9279(1)  | 37(1) |
| C96  | 301(2)  | -382(1)  | 9017(1)  | 37(1) |
| C106 | 1647(1) | -483(1)  | 5831(1)  | 35(1) |
| C116 | 1518(2) | 513(2)   | 5444(1)  | 53(1) |
| C126 | 1637(2) | -1087(2) | 5325(1)  | 51(1) |
| C17  | 7133(2) | 4610(2)  | 10022(2) | 59(1) |
| C27  | 7260(2) | 5428(2)  | 10264(1) | 49(1) |
| C37  | 6917(2) | 6295(2)  | 9805(1)  | 46(1) |
| C47  | 7120(2) | 7126(2)  | 9971(1)  | 51(1) |
| C57  | 6842(2) | 8003(2)  | 9459(1)  | 52(1) |
| C18  | 5720(2) | 4694(2)  | 5367(1)  | 48(1) |
| C28  | 5640(2) | 4195(2)  | 4895(1)  | 46(1) |
| C38  | 4918(2) | 4498(2)  | 4529(1)  | 47(1) |

---

Table 3. Bond lengths [Å] and angles [°] for holkd18.

|             |            |              |            |
|-------------|------------|--------------|------------|
| Co(1)-N(11) | 1.9162(14) | K(2)-C(22)   | 3.4913(18) |
| Co(1)-N(21) | 1.9164(14) | K(2)-C(56)   | 3.5039(18) |
| Co(1)-K(2)  | 3.5453(7)  | K(2)-H(1)    | 2.67(2)    |
| Co(1)-K(1)  | 3.6363(7)  | K(2)-H(2)    | 2.60(2)    |
| Co(1)-H(1)  | 1.84(2)    | N(11)-C(21)  | 1.339(2)   |
| Co(2)-N(14) | 1.9106(13) | N(11)-C(12)  | 1.426(2)   |
| Co(2)-N(24) | 1.9121(13) | N(21)-C(41)  | 1.335(2)   |
| Co(2)-K(2)  | 3.6047(7)  | N(21)-C(13)  | 1.422(2)   |
| Co(2)-K(1)  | 3.6144(7)  | N(14)-C(24)  | 1.335(2)   |
| Co(2)-H(2)  | 1.78(2)    | N(14)-C(15)  | 1.422(2)   |
| K(1)-C(33)  | 3.1676(18) | N(24)-C(44)  | 1.340(2)   |
| K(1)-C(55)  | 3.2033(18) | N(24)-C(16)  | 1.4238(19) |
| K(1)-C(43)  | 3.2173(17) | C(11)-C(71)  | 1.526(3)   |
| K(1)-C(45)  | 3.2322(18) | C(11)-C(61)  | 1.536(3)   |
| K(1)-C(23)  | 3.2644(18) | C(11)-C(81)  | 1.541(3)   |
| K(1)-C(65)  | 3.2957(17) | C(11)-C(21)  | 1.564(2)   |
| K(1)-C(35)  | 3.3257(18) | C(21)-C(31)  | 1.404(2)   |
| K(1)-C(53)  | 3.3291(17) | C(31)-C(41)  | 1.411(2)   |
| K(1)-C(15)  | 3.4090(17) | C(31)-H(31A) | 0.9500     |
| K(1)-C(13)  | 3.4162(16) | C(41)-C(51)  | 1.560(2)   |
| K(1)-C(25)  | 3.4218(17) | C(51)-C(111) | 1.527(3)   |
| K(1)-C(63)  | 3.4497(17) | C(51)-C(91)  | 1.537(3)   |
| K(1)-K(2)   | 4.3426(7)  | C(51)-C(101) | 1.538(3)   |
| K(1)-H(1)   | 2.67(2)    | C(61)-H(61A) | 0.9800     |
| K(1)-H(2)   | 2.64(2)    | C(61)-H(61B) | 0.9800     |
| K(2)-C(36)  | 3.1256(18) | C(61)-H(61C) | 0.9800     |
| K(2)-C(52)  | 3.1729(18) | C(71)-H(71A) | 0.9800     |
| K(2)-C(62)  | 3.1805(17) | C(71)-H(71B) | 0.9800     |
| K(2)-C(26)  | 3.1826(16) | C(71)-H(71C) | 0.9800     |
| K(2)-C(46)  | 3.3004(17) | C(81)-H(81A) | 0.9800     |
| K(2)-C(42)  | 3.3209(19) | C(81)-H(81B) | 0.9800     |
| K(2)-C(12)  | 3.3573(17) | C(81)-H(81C) | 0.9800     |
| K(2)-C(16)  | 3.4221(16) | C(91)-H(91A) | 0.9800     |
| K(2)-C(32)  | 3.4450(19) | C(91)-H(91B) | 0.9800     |



|               |          |               |          |
|---------------|----------|---------------|----------|
| C(91)-H(91C)  | 0.9800   | C(13)-C(23)   | 1.415(2) |
| C(101)-H(10A) | 0.9800   | C(13)-C(63)   | 1.418(2) |
| C(101)-H(10B) | 0.9800   | C(23)-C(33)   | 1.392(2) |
| C(101)-H(10C) | 0.9800   | C(23)-C(73)   | 1.522(3) |
| C(111)-H(11A) | 0.9800   | C(33)-C(43)   | 1.384(3) |
| C(111)-H(11B) | 0.9800   | C(33)-H(33A)  | 0.9500   |
| C(111)-H(11C) | 0.9800   | C(43)-C(53)   | 1.391(3) |
| C(12)-C(62)   | 1.414(2) | C(43)-H(43A)  | 0.9500   |
| C(12)-C(22)   | 1.416(3) | C(53)-C(63)   | 1.388(2) |
| C(22)-C(32)   | 1.400(3) | C(53)-H(53A)  | 0.9500   |
| C(22)-C(72)   | 1.511(3) | C(63)-C(103)  | 1.521(3) |
| C(32)-C(42)   | 1.381(3) | C(73)-C(83)   | 1.519(3) |
| C(32)-H(32A)  | 0.9500   | C(73)-C(93)   | 1.529(3) |
| C(42)-C(52)   | 1.381(3) | C(73)-H(73A)  | 1.0000   |
| C(42)-H(42A)  | 0.9500   | C(83)-H(83A)  | 0.9800   |
| C(52)-C(62)   | 1.398(2) | C(83)-H(83B)  | 0.9800   |
| C(52)-H(52A)  | 0.9500   | C(83)-H(83C)  | 0.9800   |
| C(62)-C(102)  | 1.523(3) | C(93)-H(93A)  | 0.9800   |
| C(72)-C(92)   | 1.525(3) | C(93)-H(93B)  | 0.9800   |
| C(72)-C(82)   | 1.531(3) | C(93)-H(93C)  | 0.9800   |
| C(72)-H(72A)  | 1.0000   | C(103)-C(113) | 1.526(3) |
| C(82)-H(82A)  | 0.9800   | C(103)-C(123) | 1.528(3) |
| C(82)-H(82B)  | 0.9800   | C(103)-H(10E) | 1.0000   |
| C(82)-H(82C)  | 0.9800   | C(113)-H(11G) | 0.9800   |
| C(92)-H(92A)  | 0.9800   | C(113)-H(11H) | 0.9800   |
| C(92)-H(92B)  | 0.9800   | C(113)-H(11I) | 0.9800   |
| C(92)-H(92C)  | 0.9800   | C(123)-H(12D) | 0.9800   |
| C(102)-C(112) | 1.520(3) | C(123)-H(12E) | 0.9800   |
| C(102)-C(122) | 1.528(3) | C(123)-H(12F) | 0.9800   |
| C(102)-H(10D) | 1.0000   | C(14)-C(74)   | 1.532(2) |
| C(112)-H(11D) | 0.9800   | C(14)-C(64)   | 1.542(2) |
| C(112)-H(11E) | 0.9800   | C(14)-C(84)   | 1.544(3) |
| C(112)-H(11F) | 0.9800   | C(14)-C(24)   | 1.565(2) |
| C(122)-H(12A) | 0.9800   | C(24)-C(34)   | 1.407(2) |
| C(122)-H(12B) | 0.9800   | C(34)-C(44)   | 1.407(2) |
| C(122)-H(12C) | 0.9800   | C(34)-H(34A)  | 0.9500   |

|               |          |               |          |
|---------------|----------|---------------|----------|
| C(44)-C(54)   | 1.560(2) | C(85)-H(85A)  | 0.9800   |
| C(54)-C(104)  | 1.522(2) | C(85)-H(85B)  | 0.9800   |
| C(54)-C(94)   | 1.538(3) | C(85)-H(85C)  | 0.9800   |
| C(54)-C(114)  | 1.544(3) | C(95)-H(95A)  | 0.9800   |
| C(64)-H(64A)  | 0.9800   | C(95)-H(95B)  | 0.9800   |
| C(64)-H(64B)  | 0.9800   | C(95)-H(95C)  | 0.9800   |
| C(64)-H(64C)  | 0.9800   | C(105)-C(125) | 1.532(3) |
| C(74)-H(74A)  | 0.9800   | C(105)-C(115) | 1.535(3) |
| C(74)-H(74B)  | 0.9800   | C(105)-H(10I) | 1.0000   |
| C(74)-H(74C)  | 0.9800   | C(115)-H(11M) | 0.9800   |
| C(84)-H(84A)  | 0.9800   | C(115)-H(11N) | 0.9800   |
| C(84)-H(84B)  | 0.9800   | C(115)-H(11O) | 0.9800   |
| C(84)-H(84C)  | 0.9800   | C(125)-H(12G) | 0.9800   |
| C(94)-H(94A)  | 0.9800   | C(125)-H(12H) | 0.9800   |
| C(94)-H(94B)  | 0.9800   | C(125)-H(12I) | 0.9800   |
| C(94)-H(94C)  | 0.9800   | C(16)-C(66)   | 1.418(2) |
| C(104)-H(10F) | 0.9800   | C(16)-C(26)   | 1.420(2) |
| C(104)-H(10G) | 0.9800   | C(26)-C(36)   | 1.394(2) |
| C(104)-H(10H) | 0.9800   | C(26)-C(76)   | 1.520(2) |
| C(114)-H(11J) | 0.9800   | C(36)-C(46)   | 1.386(3) |
| C(114)-H(11K) | 0.9800   | C(36)-H(36A)  | 0.9500   |
| C(114)-H(11L) | 0.9800   | C(46)-C(56)   | 1.383(3) |
| C(15)-C(65)   | 1.410(2) | C(46)-H(46A)  | 0.9500   |
| C(15)-C(25)   | 1.421(2) | C(56)-C(66)   | 1.396(2) |
| C(25)-C(35)   | 1.389(2) | C(56)-H(56A)  | 0.9500   |
| C(25)-C(75)   | 1.524(3) | C(66)-C(106)  | 1.520(3) |
| C(35)-C(45)   | 1.386(3) | C(76)-C(96)   | 1.533(3) |
| C(35)-H(35A)  | 0.9500   | C(76)-C(86)   | 1.536(2) |
| C(45)-C(55)   | 1.382(3) | C(76)-H(76A)  | 1.0000   |
| C(45)-H(45A)  | 0.9500   | C(86)-H(86A)  | 0.9800   |
| C(55)-C(65)   | 1.400(2) | C(86)-H(86B)  | 0.9800   |
| C(55)-H(55A)  | 0.9500   | C(86)-H(86C)  | 0.9800   |
| C(65)-C(105)  | 1.521(2) | C(96)-H(96A)  | 0.9800   |
| C(75)-C(85)   | 1.533(3) | C(96)-H(96B)  | 0.9800   |
| C(75)-C(95)   | 1.533(3) | C(96)-H(96C)  | 0.9800   |
| C(75)-H(75A)  | 1.0000   | C(106)-C(126) | 1.525(3) |

|                   |           |                   |            |
|-------------------|-----------|-------------------|------------|
| C(106)-C(116)     | 1.536(3)  | K(2)-Co(1)-K(1)   | 74.399(10) |
| C(106)-H(10J)     | 1.0000    | N(11)-Co(1)-H(1)  | 128.2(7)   |
| C(116)-H(11P)     | 0.9800    | N(21)-Co(1)-H(1)  | 134.1(7)   |
| C(116)-H(11Q)     | 0.9800    | K(2)-Co(1)-H(1)   | 47.3(7)    |
| C(116)-H(11R)     | 0.9800    | K(1)-Co(1)-H(1)   | 45.0(7)    |
| C(126)-H(12J)     | 0.9800    | N(14)-Co(2)-N(24) | 96.59(6)   |
| C(126)-H(12K)     | 0.9800    | N(14)-Co(2)-K(2)  | 159.66(4)  |
| C(126)-H(12L)     | 0.9800    | N(24)-Co(2)-K(2)  | 93.13(4)   |
| C(17)-C(27)       | 1.522(3)  | N(14)-Co(2)-K(1)  | 93.23(4)   |
| C(17)-H(17A)      | 0.9800    | N(24)-Co(2)-K(1)  | 164.45(4)  |
| C(17)-H(17B)      | 0.9800    | K(2)-Co(2)-K(1)   | 73.960(10) |
| C(17)-H(17C)      | 0.9800    | N(14)-Co(2)-H(2)  | 133.5(7)   |
| C(27)-C(37)       | 1.498(3)  | N(24)-Co(2)-H(2)  | 129.4(7)   |
| C(27)-H(27A)      | 0.9900    | K(2)-Co(2)-H(2)   | 43.0(7)    |
| C(27)-H(27B)      | 0.9900    | K(1)-Co(2)-H(2)   | 44.0(7)    |
| C(37)-C(47)       | 1.506(3)  | C(33)-K(1)-C(55)  | 101.39(5)  |
| C(37)-H(37A)      | 0.9900    | C(33)-K(1)-C(43)  | 25.02(5)   |
| C(37)-H(37B)      | 0.9900    | C(55)-K(1)-C(43)  | 83.29(4)   |
| C(47)-C(57)       | 1.531(3)  | C(33)-K(1)-C(45)  | 79.84(5)   |
| C(47)-H(47A)      | 0.9900    | C(55)-K(1)-C(45)  | 24.80(5)   |
| C(47)-H(47B)      | 0.9900    | C(43)-K(1)-C(45)  | 67.20(4)   |
| C(57)-H(57A)      | 0.9800    | C(33)-K(1)-C(23)  | 24.93(4)   |
| C(57)-H(57B)      | 0.9800    | C(55)-K(1)-C(23)  | 125.81(4)  |
| C(57)-H(57C)      | 0.9800    | C(43)-K(1)-C(23)  | 43.94(4)   |
| C(18)-C(28)       | 1.387(3)  | C(45)-K(1)-C(23)  | 104.76(4)  |
| C(18)-C(38)#1     | 1.392(3)  | C(33)-K(1)-C(65)  | 123.47(4)  |
| C(18)-H(18A)      | 0.9500    | C(55)-K(1)-C(65)  | 24.82(4)   |
| C(28)-C(38)       | 1.375(3)  | C(43)-K(1)-C(65)  | 107.88(4)  |
| C(28)-H(28A)      | 0.9500    | C(45)-K(1)-C(65)  | 43.63(4)   |
| C(38)-C(18)#1     | 1.392(3)  | C(23)-K(1)-C(65)  | 148.38(4)  |
| C(38)-H(38A)      | 0.9500    | C(33)-K(1)-C(35)  | 79.36(5)   |
| N(11)-Co(1)-N(21) | 96.73(6)  | C(55)-K(1)-C(35)  | 42.96(5)   |
| N(11)-Co(1)-K(2)  | 92.25(4)  | C(43)-K(1)-C(35)  | 76.82(5)   |
| N(21)-Co(1)-K(2)  | 154.63(4) | C(45)-K(1)-C(35)  | 24.34(5)   |
| N(11)-Co(1)-K(1)  | 165.48(4) | C(23)-K(1)-C(35)  | 101.75(5)  |
| N(21)-Co(1)-K(1)  | 93.30(4)  | C(65)-K(1)-C(35)  | 49.99(4)   |

|                  |           |                  |             |
|------------------|-----------|------------------|-------------|
| C(33)-K(1)-C(53) | 43.08(5)  | C(43)-K(1)-C(63) | 42.55(4)    |
| C(55)-K(1)-C(53) | 88.48(4)  | C(45)-K(1)-C(63) | 104.50(4)   |
| C(43)-K(1)-C(53) | 24.47(5)  | C(23)-K(1)-C(63) | 42.72(4)    |
| C(45)-K(1)-C(53) | 80.95(4)  | C(65)-K(1)-C(63) | 131.76(4)   |
| C(23)-K(1)-C(53) | 50.06(4)  | C(35)-K(1)-C(63) | 119.03(4)   |
| C(65)-K(1)-C(53) | 112.28(4) | C(53)-K(1)-C(63) | 23.54(4)    |
| C(35)-K(1)-C(53) | 96.90(5)  | C(15)-K(1)-C(63) | 152.47(4)   |
| C(33)-K(1)-C(15) | 121.25(4) | C(13)-K(1)-C(63) | 23.83(4)    |
| C(55)-K(1)-C(15) | 42.72(4)  | C(25)-K(1)-C(63) | 142.66(4)   |
| C(43)-K(1)-C(15) | 116.22(4) | C(33)-K(1)-Co(2) | 140.68(4)   |
| C(45)-K(1)-C(15) | 49.70(4)  | C(55)-K(1)-Co(2) | 85.37(3)    |
| C(23)-K(1)-C(15) | 141.41(4) | C(43)-K(1)-Co(2) | 155.47(4)   |
| C(65)-K(1)-C(15) | 24.21(4)  | C(45)-K(1)-Co(2) | 94.27(3)    |
| C(35)-K(1)-C(15) | 42.06(4)  | C(23)-K(1)-Co(2) | 136.10(3)   |
| C(53)-K(1)-C(15) | 129.58(4) | C(65)-K(1)-Co(2) | 61.35(3)    |
| C(33)-K(1)-C(13) | 42.85(4)  | C(35)-K(1)-Co(2) | 80.05(3)    |
| C(55)-K(1)-C(13) | 130.13(4) | C(53)-K(1)-Co(2) | 173.47(3)   |
| C(43)-K(1)-C(13) | 49.91(4)  | C(15)-K(1)-Co(2) | 44.99(3)    |
| C(45)-K(1)-C(13) | 117.11(4) | C(13)-K(1)-Co(2) | 144.40(3)   |
| C(23)-K(1)-C(13) | 24.32(4)  | C(25)-K(1)-Co(2) | 56.35(3)    |
| C(65)-K(1)-C(13) | 154.19(4) | C(63)-K(1)-Co(2) | 160.76(3)   |
| C(35)-K(1)-C(13) | 122.08(4) | C(33)-K(1)-Co(1) | 84.94(3)    |
| C(53)-K(1)-C(13) | 41.93(4)  | C(55)-K(1)-Co(1) | 155.77(4)   |
| C(15)-K(1)-C(13) | 164.10(4) | C(43)-K(1)-Co(1) | 94.41(3)    |
| C(33)-K(1)-C(25) | 98.93(5)  | C(45)-K(1)-Co(1) | 161.07(3)   |
| C(55)-K(1)-C(25) | 49.77(4)  | C(23)-K(1)-Co(1) | 60.71(3)    |
| C(43)-K(1)-C(25) | 100.22(4) | C(65)-K(1)-Co(1) | 149.73(3)   |
| C(45)-K(1)-C(25) | 42.54(4)  | C(35)-K(1)-Co(1) | 159.35(4)   |
| C(23)-K(1)-C(25) | 117.42(4) | C(53)-K(1)-Co(1) | 80.25(3)    |
| C(65)-K(1)-C(25) | 42.82(4)  | C(15)-K(1)-Co(1) | 149.15(3)   |
| C(35)-K(1)-C(25) | 23.71(4)  | C(13)-K(1)-Co(1) | 44.79(3)    |
| C(53)-K(1)-C(25) | 120.52(4) | C(25)-K(1)-Co(1) | 153.02(3)   |
| C(15)-K(1)-C(25) | 24.02(4)  | C(63)-K(1)-Co(1) | 56.72(3)    |
| C(13)-K(1)-C(25) | 141.00(4) | Co(2)-K(1)-Co(1) | 104.643(11) |
| C(33)-K(1)-C(63) | 49.69(4)  | C(33)-K(1)-K(2)  | 125.95(4)   |
| C(55)-K(1)-C(63) | 110.03(4) | C(55)-K(1)-K(2)  | 131.69(3)   |

|                 |            |                  |           |
|-----------------|------------|------------------|-----------|
| C(43)-K(1)-K(2) | 144.57(3)  | C(13)-K(1)-H(2)  | 116.5(5)  |
| C(45)-K(1)-K(2) | 147.07(3)  | C(25)-K(1)-H(2)  | 74.8(5)   |
| C(23)-K(1)-K(2) | 102.34(3)  | C(63)-K(1)-H(2)  | 136.7(5)  |
| C(65)-K(1)-K(2) | 107.44(3)  | Co(2)-K(1)-H(2)  | 28.0(5)   |
| C(35)-K(1)-K(2) | 130.37(3)  | Co(1)-K(1)-H(2)  | 81.0(5)   |
| C(53)-K(1)-K(2) | 131.48(3)  | K(2)-K(1)-H(2)   | 33.8(5)   |
| C(15)-K(1)-K(2) | 97.40(3)   | H(1)-K(1)-H(2)   | 69.3(7)   |
| C(13)-K(1)-K(2) | 95.10(3)   | C(36)-K(2)-C(52) | 82.99(5)  |
| C(25)-K(1)-K(2) | 107.42(3)  | C(36)-K(2)-C(62) | 108.39(4) |
| C(63)-K(1)-K(2) | 108.07(3)  | C(52)-K(2)-C(62) | 25.42(4)  |
| Co(2)-K(1)-K(2) | 52.918(9)  | C(36)-K(2)-C(26) | 25.51(4)  |
| Co(1)-K(1)-K(2) | 51.844(11) | C(52)-K(2)-C(26) | 108.48(4) |
| C(33)-K(1)-H(1) | 113.7(5)   | C(62)-K(2)-C(26) | 133.86(4) |
| C(55)-K(1)-H(1) | 135.2(5)   | C(36)-K(2)-C(46) | 24.71(5)  |
| C(43)-K(1)-H(1) | 118.5(5)   | C(52)-K(2)-C(46) | 69.34(4)  |
| C(45)-K(1)-H(1) | 159.5(5)   | C(62)-K(2)-C(46) | 92.87(4)  |
| C(23)-K(1)-H(1) | 89.8(5)    | C(26)-K(2)-C(46) | 43.94(4)  |
| C(65)-K(1)-H(1) | 120.8(5)   | C(36)-K(2)-C(42) | 70.74(4)  |
| C(35)-K(1)-H(1) | 164.6(5)   | C(52)-K(2)-C(42) | 24.41(5)  |
| C(53)-K(1)-H(1) | 98.3(5)    | C(62)-K(2)-C(42) | 43.73(5)  |
| C(15)-K(1)-H(1) | 123.8(5)   | C(26)-K(2)-C(42) | 94.88(4)  |
| C(13)-K(1)-H(1) | 71.8(5)    | C(46)-K(2)-C(42) | 66.75(4)  |
| C(25)-K(1)-H(1) | 140.9(5)   | C(36)-K(2)-C(12) | 120.39(4) |
| C(63)-K(1)-H(1) | 76.3(5)    | C(52)-K(2)-C(12) | 43.41(4)  |
| Co(2)-K(1)-H(1) | 84.6(5)    | C(62)-K(2)-C(12) | 24.78(4)  |
| Co(1)-K(1)-H(1) | 29.1(5)    | C(26)-K(2)-C(12) | 143.47(4) |
| K(2)-K(1)-H(1)  | 35.5(5)    | C(46)-K(2)-C(12) | 112.35(4) |
| C(33)-K(1)-H(2) | 124.4(5)   | C(42)-K(2)-C(12) | 49.67(4)  |
| C(55)-K(1)-H(2) | 112.8(5)   | C(36)-K(2)-C(16) | 43.09(4)  |
| C(43)-K(1)-H(2) | 149.1(5)   | C(52)-K(2)-C(16) | 118.45(4) |
| C(45)-K(1)-H(2) | 117.0(5)   | C(62)-K(2)-C(16) | 139.93(4) |
| C(23)-K(1)-H(2) | 110.6(5)   | C(26)-K(2)-C(16) | 24.48(4)  |
| C(65)-K(1)-H(2) | 89.3(5)    | C(46)-K(2)-C(16) | 49.28(4)  |
| C(35)-K(1)-H(2) | 96.9(5)    | C(42)-K(2)-C(16) | 112.99(4) |
| C(53)-K(1)-H(2) | 158.4(5)   | C(12)-K(2)-C(16) | 161.60(4) |
| C(15)-K(1)-H(2) | 70.8(5)    | C(36)-K(2)-C(32) | 83.09(5)  |

|                  |           |                  |             |
|------------------|-----------|------------------|-------------|
| C(52)-K(2)-C(32) | 41.94(5)  | C(56)-K(2)-Co(1) | 149.91(3)   |
| C(62)-K(2)-C(32) | 49.55(5)  | C(36)-K(2)-Co(2) | 86.37(3)    |
| C(26)-K(2)-C(32) | 102.58(4) | C(52)-K(2)-Co(2) | 158.33(4)   |
| C(46)-K(2)-C(32) | 86.46(5)  | C(62)-K(2)-Co(2) | 155.61(4)   |
| C(42)-K(2)-C(32) | 23.46(5)  | C(26)-K(2)-Co(2) | 62.07(3)    |
| C(12)-K(2)-C(32) | 41.64(4)  | C(46)-K(2)-Co(2) | 93.60(3)    |
| C(16)-K(2)-C(32) | 125.62(4) | C(42)-K(2)-Co(2) | 156.94(3)   |
| C(36)-K(2)-C(22) | 106.30(4) | C(12)-K(2)-Co(2) | 152.96(3)   |
| C(52)-K(2)-C(22) | 49.32(5)  | C(16)-K(2)-Co(2) | 45.08(3)    |
| C(62)-K(2)-C(22) | 42.76(5)  | C(32)-K(2)-Co(2) | 154.41(4)   |
| C(26)-K(2)-C(22) | 124.13(4) | C(22)-K(2)-Co(2) | 152.35(3)   |
| C(46)-K(2)-C(22) | 108.21(4) | C(56)-K(2)-Co(2) | 78.61(3)    |
| C(42)-K(2)-C(22) | 41.72(4)  | Co(1)-K(2)-Co(2) | 106.756(11) |
| C(12)-K(2)-C(22) | 23.77(4)  | C(36)-K(2)-K(1)  | 137.22(3)   |
| C(16)-K(2)-C(22) | 148.19(4) | C(52)-K(2)-K(1)  | 139.76(3)   |
| C(32)-K(2)-C(22) | 23.27(4)  | C(62)-K(2)-K(1)  | 114.35(3)   |
| C(36)-K(2)-C(56) | 41.76(5)  | C(26)-K(2)-K(1)  | 111.72(3)   |
| C(52)-K(2)-C(56) | 80.89(4)  | C(46)-K(2)-K(1)  | 145.73(3)   |
| C(62)-K(2)-C(56) | 99.25(4)  | C(42)-K(2)-K(1)  | 147.51(3)   |
| C(26)-K(2)-C(56) | 49.15(4)  | C(12)-K(2)-K(1)  | 100.00(3)   |
| C(46)-K(2)-C(56) | 23.20(4)  | C(16)-K(2)-K(1)  | 98.20(3)    |
| C(42)-K(2)-C(56) | 85.77(5)  | C(32)-K(2)-K(1)  | 126.78(4)   |
| C(12)-K(2)-C(56) | 123.14(4) | C(22)-K(2)-K(1)  | 105.95(3)   |
| C(16)-K(2)-C(56) | 40.91(4)  | C(56)-K(2)-K(1)  | 125.59(3)   |
| C(32)-K(2)-C(56) | 107.62(5) | Co(1)-K(2)-K(1)  | 53.757(10)  |
| C(22)-K(2)-C(56) | 127.13(4) | Co(2)-K(2)-K(1)  | 53.123(11)  |
| C(36)-K(2)-Co(1) | 163.08(4) | C(36)-K(2)-H(1)  | 146.5(5)    |
| C(52)-K(2)-Co(1) | 87.75(3)  | C(52)-K(2)-H(1)  | 114.0(5)    |
| C(62)-K(2)-Co(1) | 63.43(3)  | C(62)-K(2)-H(1)  | 92.0(5)     |
| C(26)-K(2)-Co(1) | 159.21(3) | C(26)-K(2)-H(1)  | 128.9(5)    |
| C(46)-K(2)-Co(1) | 156.05(3) | C(46)-K(2)-H(1)  | 171.2(5)    |
| C(42)-K(2)-Co(1) | 95.28(3)  | C(42)-K(2)-H(1)  | 112.6(5)    |
| C(12)-K(2)-Co(1) | 46.26(3)  | C(12)-K(2)-H(1)  | 70.6(5)     |
| C(16)-K(2)-Co(1) | 151.71(3) | C(16)-K(2)-H(1)  | 127.3(5)    |
| C(32)-K(2)-Co(1) | 80.57(3)  | C(32)-K(2)-H(1)  | 91.2(5)     |
| C(22)-K(2)-Co(1) | 57.29(3)  | C(22)-K(2)-H(1)  | 70.9(5)     |

|                   |            |                     |            |
|-------------------|------------|---------------------|------------|
| C(56)-K(2)-H(1)   | 161.2(5)   | C(81)-C(11)-C(21)   | 109.30(16) |
| Co(1)-K(2)-H(1)   | 30.5(5)    | N(11)-C(21)-C(31)   | 120.52(15) |
| Co(2)-K(2)-H(1)   | 84.9(5)    | N(11)-C(21)-C(11)   | 125.61(15) |
| K(1)-K(2)-H(1)    | 35.6(5)    | C(31)-C(21)-C(11)   | 113.77(14) |
| C(36)-K(2)-H(2)   | 111.9(5)   | C(21)-C(31)-C(41)   | 132.30(16) |
| C(52)-K(2)-H(2)   | 147.2(5)   | C(21)-C(31)-H(31A)  | 113.9      |
| C(62)-K(2)-H(2)   | 129.4(5)   | C(41)-C(31)-H(31A)  | 113.9      |
| C(26)-K(2)-H(2)   | 89.2(5)    | N(21)-C(41)-C(31)   | 119.60(15) |
| C(46)-K(2)-H(2)   | 112.0(5)   | N(21)-C(41)-C(51)   | 126.41(14) |
| C(42)-K(2)-H(2)   | 171.5(5)   | C(31)-C(41)-C(51)   | 113.98(14) |
| C(12)-K(2)-H(2)   | 127.2(5)   | C(111)-C(51)-C(91)  | 105.73(16) |
| C(16)-K(2)-H(2)   | 68.9(5)    | C(111)-C(51)-C(101) | 106.80(16) |
| C(32)-K(2)-H(2)   | 161.1(5)   | C(91)-C(51)-C(101)  | 109.40(16) |
| C(22)-K(2)-H(2)   | 139.5(5)   | C(111)-C(51)-C(41)  | 116.84(14) |
| C(56)-K(2)-H(2)   | 91.3(5)    | C(91)-C(51)-C(41)   | 108.94(14) |
| Co(1)-K(2)-H(2)   | 83.3(5)    | C(101)-C(51)-C(41)  | 108.93(15) |
| Co(2)-K(2)-H(2)   | 27.9(5)    | C(11)-C(61)-H(61A)  | 109.5      |
| K(1)-K(2)-H(2)    | 34.3(5)    | C(11)-C(61)-H(61B)  | 109.5      |
| H(1)-K(2)-H(2)    | 70.0(7)    | H(61A)-C(61)-H(61B) | 109.5      |
| C(21)-N(11)-C(12) | 127.25(14) | C(11)-C(61)-H(61C)  | 109.5      |
| C(21)-N(11)-Co(1) | 124.76(11) | H(61A)-C(61)-H(61C) | 109.5      |
| C(12)-N(11)-Co(1) | 107.88(10) | H(61B)-C(61)-H(61C) | 109.5      |
| C(41)-N(21)-C(13) | 127.53(14) | C(11)-C(71)-H(71A)  | 109.5      |
| C(41)-N(21)-Co(1) | 125.76(11) | C(11)-C(71)-H(71B)  | 109.5      |
| C(13)-N(21)-Co(1) | 106.69(10) | H(71A)-C(71)-H(71B) | 109.5      |
| C(24)-N(14)-C(15) | 127.07(14) | C(11)-C(71)-H(71C)  | 109.5      |
| C(24)-N(14)-Co(2) | 125.93(11) | H(71A)-C(71)-H(71C) | 109.5      |
| C(15)-N(14)-Co(2) | 106.98(10) | H(71B)-C(71)-H(71C) | 109.5      |
| C(44)-N(24)-C(16) | 127.60(13) | C(11)-C(81)-H(81A)  | 109.5      |
| C(44)-N(24)-Co(2) | 125.28(11) | C(11)-C(81)-H(81B)  | 109.5      |
| C(16)-N(24)-Co(2) | 107.09(9)  | H(81A)-C(81)-H(81B) | 109.5      |
| C(71)-C(11)-C(61) | 106.79(17) | C(11)-C(81)-H(81C)  | 109.5      |
| C(71)-C(11)-C(81) | 106.10(17) | H(81A)-C(81)-H(81C) | 109.5      |
| C(61)-C(11)-C(81) | 109.35(18) | H(81B)-C(81)-H(81C) | 109.5      |
| C(71)-C(11)-C(21) | 116.84(15) | C(51)-C(91)-H(91A)  | 109.5      |
| C(61)-C(11)-C(21) | 108.28(15) | C(51)-C(91)-H(91B)  | 109.5      |

|                      |            |                      |            |
|----------------------|------------|----------------------|------------|
| H(91A)-C(91)-H(91B)  | 109.5      | C(32)-C(42)-K(2)     | 83.32(11)  |
| C(51)-C(91)-H(91C)   | 109.5      | C(52)-C(42)-H(42A)   | 120.4      |
| H(91A)-C(91)-H(91C)  | 109.5      | C(32)-C(42)-H(42A)   | 120.4      |
| H(91B)-C(91)-H(91C)  | 109.5      | K(2)-C(42)-H(42A)    | 115.1      |
| C(51)-C(101)-H(10A)  | 109.5      | C(42)-C(52)-C(62)    | 121.57(18) |
| C(51)-C(101)-H(10B)  | 109.5      | C(42)-C(52)-K(2)     | 83.81(11)  |
| H(10A)-C(101)-H(10B) | 109.5      | C(62)-C(52)-K(2)     | 77.59(10)  |
| C(51)-C(101)-H(10C)  | 109.5      | C(42)-C(52)-H(52A)   | 119.2      |
| H(10A)-C(101)-H(10C) | 109.5      | C(62)-C(52)-H(52A)   | 119.2      |
| H(10B)-C(101)-H(10C) | 109.5      | K(2)-C(52)-H(52A)    | 109.3      |
| C(51)-C(111)-H(11A)  | 109.5      | C(52)-C(62)-C(12)    | 118.92(17) |
| C(51)-C(111)-H(11B)  | 109.5      | C(52)-C(62)-C(102)   | 119.14(16) |
| H(11A)-C(111)-H(11B) | 109.5      | C(12)-C(62)-C(102)   | 121.87(15) |
| C(51)-C(111)-H(11C)  | 109.5      | C(52)-C(62)-K(2)     | 76.99(10)  |
| H(11A)-C(111)-H(11C) | 109.5      | C(12)-C(62)-K(2)     | 84.63(10)  |
| H(11B)-C(111)-H(11C) | 109.5      | C(102)-C(62)-K(2)    | 105.56(10) |
| C(62)-C(12)-C(22)    | 119.89(15) | C(22)-C(72)-C(92)    | 111.72(18) |
| C(62)-C(12)-N(11)    | 119.93(16) | C(22)-C(72)-C(82)    | 112.54(17) |
| C(22)-C(12)-N(11)    | 119.90(15) | C(92)-C(72)-C(82)    | 109.7(2)   |
| C(62)-C(12)-K(2)     | 70.59(9)   | C(22)-C(72)-H(72A)   | 107.6      |
| C(22)-C(12)-K(2)     | 83.43(10)  | C(92)-C(72)-H(72A)   | 107.6      |
| N(11)-C(12)-K(2)     | 111.26(9)  | C(82)-C(72)-H(72A)   | 107.6      |
| C(32)-C(22)-C(12)    | 118.41(17) | C(72)-C(82)-H(82A)   | 109.5      |
| C(32)-C(22)-C(72)    | 118.88(18) | C(72)-C(82)-H(82B)   | 109.5      |
| C(12)-C(22)-C(72)    | 122.71(16) | H(82A)-C(82)-H(82B)  | 109.5      |
| C(32)-C(22)-K(2)     | 76.51(10)  | C(72)-C(82)-H(82C)   | 109.5      |
| C(12)-C(22)-K(2)     | 72.80(9)   | H(82A)-C(82)-H(82C)  | 109.5      |
| C(72)-C(22)-K(2)     | 121.15(12) | H(82B)-C(82)-H(82C)  | 109.5      |
| C(42)-C(32)-C(22)    | 121.92(19) | C(72)-C(92)-H(92A)   | 109.5      |
| C(42)-C(32)-K(2)     | 73.22(11)  | C(72)-C(92)-H(92B)   | 109.5      |
| C(22)-C(32)-K(2)     | 80.22(10)  | H(92A)-C(92)-H(92B)  | 109.5      |
| C(42)-C(32)-H(32A)   | 119.0      | C(72)-C(92)-H(92C)   | 109.5      |
| C(22)-C(32)-H(32A)   | 119.0      | H(92A)-C(92)-H(92C)  | 109.5      |
| K(2)-C(32)-H(32A)    | 118.2      | H(92B)-C(92)-H(92C)  | 109.5      |
| C(52)-C(42)-C(32)    | 119.25(17) | C(112)-C(102)-C(62)  | 113.75(16) |
| C(52)-C(42)-K(2)     | 71.78(10)  | C(112)-C(102)-C(122) | 108.69(19) |



|                      |            |                     |            |
|----------------------|------------|---------------------|------------|
| C(62)-C(102)-C(122)  | 109.82(16) | C(53)-C(43)-K(1)    | 82.27(10)  |
| C(112)-C(102)-H(10D) | 108.1      | C(33)-C(43)-H(43A)  | 120.6      |
| C(62)-C(102)-H(10D)  | 108.1      | C(53)-C(43)-H(43A)  | 120.6      |
| C(122)-C(102)-H(10D) | 108.1      | K(1)-C(43)-H(43A)   | 112.3      |
| C(102)-C(112)-H(11D) | 109.5      | C(63)-C(53)-C(43)   | 121.81(17) |
| C(102)-C(112)-H(11E) | 109.5      | C(63)-C(53)-K(1)    | 83.11(9)   |
| H(11D)-C(112)-H(11E) | 109.5      | C(43)-C(53)-K(1)    | 73.26(10)  |
| C(102)-C(112)-H(11F) | 109.5      | C(63)-C(53)-H(53A)  | 119.1      |
| H(11D)-C(112)-H(11F) | 109.5      | C(43)-C(53)-H(53A)  | 119.1      |
| H(11E)-C(112)-H(11F) | 109.5      | K(1)-C(53)-H(53A)   | 114.8      |
| C(102)-C(122)-H(12A) | 109.5      | C(53)-C(63)-C(13)   | 118.77(16) |
| C(102)-C(122)-H(12B) | 109.5      | C(53)-C(63)-C(103)  | 120.09(16) |
| H(12A)-C(122)-H(12B) | 109.5      | C(13)-C(63)-C(103)  | 121.13(15) |
| C(102)-C(122)-H(12C) | 109.5      | C(53)-C(63)-K(1)    | 73.35(9)   |
| H(12A)-C(122)-H(12C) | 109.5      | C(13)-C(63)-K(1)    | 76.76(9)   |
| H(12B)-C(122)-H(12C) | 109.5      | C(103)-C(63)-K(1)   | 120.52(10) |
| C(23)-C(13)-C(63)    | 119.84(15) | C(83)-C(73)-C(23)   | 113.77(17) |
| C(23)-C(13)-N(21)    | 120.45(15) | C(83)-C(73)-C(93)   | 108.83(18) |
| C(63)-C(13)-N(21)    | 119.41(15) | C(23)-C(73)-C(93)   | 109.16(17) |
| C(23)-C(13)-K(1)     | 71.82(9)   | C(83)-C(73)-H(73A)  | 108.3      |
| C(63)-C(13)-K(1)     | 79.41(9)   | C(23)-C(73)-H(73A)  | 108.3      |
| N(21)-C(13)-K(1)     | 114.34(9)  | C(93)-C(73)-H(73A)  | 108.3      |
| C(33)-C(23)-C(13)    | 118.83(16) | C(73)-C(83)-H(83A)  | 109.5      |
| C(33)-C(23)-C(73)    | 120.13(16) | C(73)-C(83)-H(83B)  | 109.5      |
| C(13)-C(23)-C(73)    | 121.02(15) | H(83A)-C(83)-H(83B) | 109.5      |
| C(33)-C(23)-K(1)     | 73.64(10)  | C(73)-C(83)-H(83C)  | 109.5      |
| C(13)-C(23)-K(1)     | 83.86(10)  | H(83A)-C(83)-H(83C) | 109.5      |
| C(73)-C(23)-K(1)     | 110.97(11) | H(83B)-C(83)-H(83C) | 109.5      |
| C(43)-C(33)-C(23)    | 121.82(17) | C(73)-C(93)-H(93A)  | 109.5      |
| C(43)-C(33)-K(1)     | 79.50(10)  | C(73)-C(93)-H(93B)  | 109.5      |
| C(23)-C(33)-K(1)     | 81.43(10)  | H(93A)-C(93)-H(93B) | 109.5      |
| C(43)-C(33)-H(33A)   | 119.1      | C(73)-C(93)-H(93C)  | 109.5      |
| C(23)-C(33)-H(33A)   | 119.1      | H(93A)-C(93)-H(93C) | 109.5      |
| K(1)-C(33)-H(33A)    | 109.9      | H(93B)-C(93)-H(93C) | 109.5      |
| C(33)-C(43)-C(53)    | 118.88(16) | C(63)-C(103)-C(113) | 112.03(15) |
| C(33)-C(43)-K(1)     | 75.48(10)  | C(63)-C(103)-C(123) | 110.96(16) |

|                      |            |                      |            |
|----------------------|------------|----------------------|------------|
| C(113)-C(103)-C(123) | 110.65(16) | C(114)-C(54)-C(44)   | 109.18(14) |
| C(63)-C(103)-H(10E)  | 107.7      | C(14)-C(64)-H(64A)   | 109.5      |
| C(113)-C(103)-H(10E) | 107.7      | C(14)-C(64)-H(64B)   | 109.5      |
| C(123)-C(103)-H(10E) | 107.7      | H(64A)-C(64)-H(64B)  | 109.5      |
| C(103)-C(113)-H(11G) | 109.5      | C(14)-C(64)-H(64C)   | 109.5      |
| C(103)-C(113)-H(11H) | 109.5      | H(64A)-C(64)-H(64C)  | 109.5      |
| H(11G)-C(113)-H(11H) | 109.5      | H(64B)-C(64)-H(64C)  | 109.5      |
| C(103)-C(113)-H(11I) | 109.5      | C(14)-C(74)-H(74A)   | 109.5      |
| H(11G)-C(113)-H(11I) | 109.5      | C(14)-C(74)-H(74B)   | 109.5      |
| H(11H)-C(113)-H(11I) | 109.5      | H(74A)-C(74)-H(74B)  | 109.5      |
| C(103)-C(123)-H(12D) | 109.5      | C(14)-C(74)-H(74C)   | 109.5      |
| C(103)-C(123)-H(12E) | 109.5      | H(74A)-C(74)-H(74C)  | 109.5      |
| H(12D)-C(123)-H(12E) | 109.5      | H(74B)-C(74)-H(74C)  | 109.5      |
| C(103)-C(123)-H(12F) | 109.5      | C(14)-C(84)-H(84A)   | 109.5      |
| H(12D)-C(123)-H(12F) | 109.5      | C(14)-C(84)-H(84B)   | 109.5      |
| H(12E)-C(123)-H(12F) | 109.5      | H(84A)-C(84)-H(84B)  | 109.5      |
| C(74)-C(14)-C(64)    | 105.71(15) | C(14)-C(84)-H(84C)   | 109.5      |
| C(74)-C(14)-C(84)    | 107.07(15) | H(84A)-C(84)-H(84C)  | 109.5      |
| C(64)-C(14)-C(84)    | 109.42(15) | H(84B)-C(84)-H(84C)  | 109.5      |
| C(74)-C(14)-C(24)    | 116.97(14) | C(54)-C(94)-H(94A)   | 109.5      |
| C(64)-C(14)-C(24)    | 108.53(14) | C(54)-C(94)-H(94B)   | 109.5      |
| C(84)-C(14)-C(24)    | 108.96(14) | H(94A)-C(94)-H(94B)  | 109.5      |
| N(14)-C(24)-C(34)    | 119.79(14) | C(54)-C(94)-H(94C)   | 109.5      |
| N(14)-C(24)-C(14)    | 126.29(14) | H(94A)-C(94)-H(94C)  | 109.5      |
| C(34)-C(24)-C(14)    | 113.90(14) | H(94B)-C(94)-H(94C)  | 109.5      |
| C(24)-C(34)-C(44)    | 132.02(15) | C(54)-C(104)-H(10F)  | 109.5      |
| C(24)-C(34)-H(34A)   | 114.0      | C(54)-C(104)-H(10G)  | 109.5      |
| C(44)-C(34)-H(34A)   | 114.0      | H(10F)-C(104)-H(10G) | 109.5      |
| N(24)-C(44)-C(34)    | 120.30(14) | C(54)-C(104)-H(10H)  | 109.5      |
| N(24)-C(44)-C(54)    | 125.88(14) | H(10F)-C(104)-H(10H) | 109.5      |
| C(34)-C(44)-C(54)    | 113.79(14) | H(10G)-C(104)-H(10H) | 109.5      |
| C(104)-C(54)-C(94)   | 106.12(15) | C(54)-C(114)-H(11J)  | 109.5      |
| C(104)-C(54)-C(114)  | 106.82(15) | C(54)-C(114)-H(11K)  | 109.5      |
| C(94)-C(54)-C(114)   | 108.98(15) | H(11J)-C(114)-H(11K) | 109.5      |
| C(104)-C(54)-C(44)   | 116.59(14) | C(54)-C(114)-H(11L)  | 109.5      |
| C(94)-C(54)-C(44)    | 108.92(14) | H(11J)-C(114)-H(11L) | 109.5      |

|                      |            |                      |            |
|----------------------|------------|----------------------|------------|
| H(11K)-C(114)-H(11L) | 109.5      | C(105)-C(65)-K(1)    | 112.21(10) |
| C(65)-C(15)-C(25)    | 120.19(15) | C(25)-C(75)-C(85)    | 112.18(17) |
| C(65)-C(15)-N(14)    | 120.11(15) | C(25)-C(75)-C(95)    | 110.36(17) |
| C(25)-C(15)-N(14)    | 119.37(15) | C(85)-C(75)-C(95)    | 110.30(18) |
| C(65)-C(15)-K(1)     | 73.39(9)   | C(25)-C(75)-H(75A)   | 108.0      |
| C(25)-C(15)-K(1)     | 78.50(9)   | C(85)-C(75)-H(75A)   | 108.0      |
| N(14)-C(15)-K(1)     | 113.42(9)  | C(95)-C(75)-H(75A)   | 108.0      |
| C(35)-C(25)-C(15)    | 118.70(16) | C(75)-C(85)-H(85A)   | 109.5      |
| C(35)-C(25)-C(75)    | 119.67(17) | C(75)-C(85)-H(85B)   | 109.5      |
| C(15)-C(25)-C(75)    | 121.64(15) | H(85A)-C(85)-H(85B)  | 109.5      |
| C(35)-C(25)-K(1)     | 74.26(10)  | C(75)-C(85)-H(85C)   | 109.5      |
| C(15)-C(25)-K(1)     | 77.48(9)   | H(85A)-C(85)-H(85C)  | 109.5      |
| C(75)-C(25)-K(1)     | 118.31(11) | H(85B)-C(85)-H(85C)  | 109.5      |
| C(45)-C(35)-C(25)    | 121.44(17) | C(75)-C(95)-H(95A)   | 109.5      |
| C(45)-C(35)-K(1)     | 74.05(10)  | C(75)-C(95)-H(95B)   | 109.5      |
| C(25)-C(35)-K(1)     | 82.03(10)  | H(95A)-C(95)-H(95B)  | 109.5      |
| C(45)-C(35)-H(35A)   | 119.3      | C(75)-C(95)-H(95C)   | 109.5      |
| C(25)-C(35)-H(35A)   | 119.3      | H(95A)-C(95)-H(95C)  | 109.5      |
| K(1)-C(35)-H(35A)    | 115.0      | H(95B)-C(95)-H(95C)  | 109.5      |
| C(55)-C(45)-C(35)    | 119.67(16) | C(65)-C(105)-C(125)  | 112.58(15) |
| C(55)-C(45)-K(1)     | 76.43(10)  | C(65)-C(105)-C(115)  | 110.36(15) |
| C(35)-C(45)-K(1)     | 81.61(10)  | C(125)-C(105)-C(115) | 110.26(16) |
| C(55)-C(45)-H(45A)   | 120.2      | C(65)-C(105)-H(10I)  | 107.8      |
| C(35)-C(45)-H(45A)   | 120.2      | C(125)-C(105)-H(10I) | 107.8      |
| K(1)-C(45)-H(45A)    | 112.3      | C(115)-C(105)-H(10I) | 107.8      |
| C(45)-C(55)-C(65)    | 121.41(16) | C(105)-C(115)-H(11M) | 109.5      |
| C(45)-C(55)-K(1)     | 78.77(10)  | C(105)-C(115)-H(11N) | 109.5      |
| C(65)-C(55)-K(1)     | 81.29(10)  | H(11M)-C(115)-H(11N) | 109.5      |
| C(45)-C(55)-H(55A)   | 119.3      | C(105)-C(115)-H(11O) | 109.5      |
| C(65)-C(55)-H(55A)   | 119.3      | H(11M)-C(115)-H(11O) | 109.5      |
| K(1)-C(55)-H(55A)    | 110.7      | H(11N)-C(115)-H(11O) | 109.5      |
| C(55)-C(65)-C(15)    | 118.57(16) | C(105)-C(125)-H(12G) | 109.5      |
| C(55)-C(65)-C(105)   | 119.47(15) | C(105)-C(125)-H(12H) | 109.5      |
| C(15)-C(65)-C(105)   | 121.94(15) | H(12G)-C(125)-H(12H) | 109.5      |
| C(55)-C(65)-K(1)     | 73.89(10)  | C(105)-C(125)-H(12I) | 109.5      |
| C(15)-C(65)-K(1)     | 82.40(10)  | H(12G)-C(125)-H(12I) | 109.5      |

|                      |            |                      |            |
|----------------------|------------|----------------------|------------|
| H(12H)-C(125)-H(12I) | 109.5      | C(96)-C(76)-C(86)    | 109.55(16) |
| C(66)-C(16)-C(26)    | 119.83(14) | C(26)-C(76)-H(76A)   | 107.9      |
| C(66)-C(16)-N(24)    | 119.98(14) | C(96)-C(76)-H(76A)   | 107.9      |
| C(26)-C(16)-N(24)    | 119.87(15) | C(86)-C(76)-H(76A)   | 107.9      |
| C(66)-C(16)-K(2)     | 84.58(9)   | C(76)-C(86)-H(86A)   | 109.5      |
| C(26)-C(16)-K(2)     | 68.27(8)   | C(76)-C(86)-H(86B)   | 109.5      |
| N(24)-C(16)-K(2)     | 112.09(9)  | H(86A)-C(86)-H(86B)  | 109.5      |
| C(36)-C(26)-C(16)    | 118.68(16) | C(76)-C(86)-H(86C)   | 109.5      |
| C(36)-C(26)-C(76)    | 120.05(15) | H(86A)-C(86)-H(86C)  | 109.5      |
| C(16)-C(26)-C(76)    | 121.24(14) | H(86B)-C(86)-H(86C)  | 109.5      |
| C(36)-C(26)-K(2)     | 74.96(9)   | C(76)-C(96)-H(96A)   | 109.5      |
| C(16)-C(26)-K(2)     | 87.25(9)   | C(76)-C(96)-H(96B)   | 109.5      |
| C(76)-C(26)-K(2)     | 105.93(10) | H(96A)-C(96)-H(96B)  | 109.5      |
| C(46)-C(36)-C(26)    | 121.72(17) | C(76)-C(96)-H(96C)   | 109.5      |
| C(46)-C(36)-K(2)     | 84.72(10)  | H(96A)-C(96)-H(96C)  | 109.5      |
| C(26)-C(36)-K(2)     | 79.53(9)   | H(96B)-C(96)-H(96C)  | 109.5      |
| C(46)-C(36)-H(36A)   | 119.1      | C(66)-C(106)-C(126)  | 112.19(17) |
| C(26)-C(36)-H(36A)   | 119.1      | C(66)-C(106)-C(116)  | 110.72(17) |
| K(2)-C(36)-H(36A)    | 106.3      | C(126)-C(106)-C(116) | 110.11(18) |
| C(56)-C(46)-C(36)    | 119.33(16) | C(66)-C(106)-H(10J)  | 107.9      |
| C(56)-C(46)-K(2)     | 86.69(10)  | C(126)-C(106)-H(10J) | 107.9      |
| C(36)-C(46)-K(2)     | 70.57(10)  | C(116)-C(106)-H(10J) | 107.9      |
| C(56)-C(46)-H(46A)   | 120.3      | C(106)-C(116)-H(11P) | 109.5      |
| C(36)-C(46)-H(46A)   | 120.3      | C(106)-C(116)-H(11Q) | 109.5      |
| K(2)-C(46)-H(46A)    | 112.7      | H(11P)-C(116)-H(11Q) | 109.5      |
| C(46)-C(56)-C(66)    | 121.67(17) | C(106)-C(116)-H(11R) | 109.5      |
| C(46)-C(56)-K(2)     | 70.11(10)  | H(11P)-C(116)-H(11R) | 109.5      |
| C(66)-C(56)-K(2)     | 81.64(10)  | H(11Q)-C(116)-H(11R) | 109.5      |
| C(46)-C(56)-H(56A)   | 119.2      | C(106)-C(126)-H(12J) | 109.5      |
| C(66)-C(56)-H(56A)   | 119.2      | C(106)-C(126)-H(12K) | 109.5      |
| K(2)-C(56)-H(56A)    | 119.9      | H(12J)-C(126)-H(12K) | 109.5      |
| C(56)-C(66)-C(16)    | 118.75(16) | C(106)-C(126)-H(12L) | 109.5      |
| C(56)-C(66)-C(106)   | 119.35(16) | H(12J)-C(126)-H(12L) | 109.5      |
| C(16)-C(66)-C(106)   | 121.90(15) | H(12K)-C(126)-H(12L) | 109.5      |
| C(26)-C(76)-C(96)    | 110.47(14) | C(27)-C(17)-H(17A)   | 109.5      |
| C(26)-C(76)-C(86)    | 112.88(14) | C(27)-C(17)-H(17B)   | 109.5      |

|                     |          |                      |          |
|---------------------|----------|----------------------|----------|
| H(17A)-C(17)-H(17B) | 109.5    | C(37)-C(47)-H(47B)   | 108.8    |
| C(27)-C(17)-H(17C)  | 109.5    | C(57)-C(47)-H(47B)   | 108.8    |
| H(17A)-C(17)-H(17C) | 109.5    | H(47A)-C(47)-H(47B)  | 107.7    |
| H(17B)-C(17)-H(17C) | 109.5    | C(47)-C(57)-H(57A)   | 109.5    |
| C(37)-C(27)-C(17)   | 111.9(2) | C(47)-C(57)-H(57B)   | 109.5    |
| C(37)-C(27)-H(27A)  | 109.2    | H(57A)-C(57)-H(57B)  | 109.5    |
| C(17)-C(27)-H(27A)  | 109.2    | C(47)-C(57)-H(57C)   | 109.5    |
| C(37)-C(27)-H(27B)  | 109.2    | H(57A)-C(57)-H(57C)  | 109.5    |
| C(17)-C(27)-H(27B)  | 109.2    | H(57B)-C(57)-H(57C)  | 109.5    |
| H(27A)-C(27)-H(27B) | 107.9    | C(28)-C(18)-C(38)#1  | 120.8(2) |
| C(27)-C(37)-C(47)   | 114.1(2) | C(28)-C(18)-H(18A)   | 119.6    |
| C(27)-C(37)-H(37A)  | 108.7    | C(38)#1-C(18)-H(18A) | 119.6    |
| C(47)-C(37)-H(37A)  | 108.7    | C(38)-C(28)-C(18)    | 119.7(2) |
| C(27)-C(37)-H(37B)  | 108.7    | C(38)-C(28)-H(28A)   | 120.2    |
| C(47)-C(37)-H(37B)  | 108.7    | C(18)-C(28)-H(28A)   | 120.2    |
| H(37A)-C(37)-H(37B) | 107.6    | C(28)-C(38)-C(18)#1  | 119.5(2) |
| C(37)-C(47)-C(57)   | 113.7(2) | C(28)-C(38)-H(38A)   | 120.2    |
| C(37)-C(47)-H(47A)  | 108.8    | C(18)#1-C(38)-H(38A) | 120.2    |
| C(57)-C(47)-H(47A)  | 108.8    |                      |          |

---

Symmetry transformations used to generate equivalent atoms:

#1 -x+1,-y+1,-z+1

Table 4. Anisotropic displacement parameters ( $\text{\AA}^2 \times 10^3$ ) for holkd18. The anisotropic displacement factor exponent takes the form:  $-2\pi^2 [ h^2 a^{*2} U_{11} + \dots + 2 h k a^* b^* U_{12} ]$

|      | $U_{11}$ | $U_{22}$ | $U_{33}$ | $U_{23}$ | $U_{13}$ | $U_{12}$ |
|------|----------|----------|----------|----------|----------|----------|
| Co1  | 18(1)    | 18(1)    | 43(1)    | -6(1)    | -11(1)   | -2(1)    |
| Co2  | 17(1)    | 18(1)    | 41(1)    | -9(1)    | -10(1)   | -1(1)    |
| K1   | 21(1)    | 21(1)    | 47(1)    | -10(1)   | -10(1)   | -3(1)    |
| K2   | 22(1)    | 22(1)    | 46(1)    | -8(1)    | -12(1)   | -3(1)    |
| N11  | 19(1)    | 20(1)    | 34(1)    | -9(1)    | -8(1)    | -4(1)    |
| N21  | 19(1)    | 20(1)    | 27(1)    | -6(1)    | -8(1)    | -3(1)    |
| N14  | 17(1)    | 23(1)    | 28(1)    | -10(1)   | -5(1)    | -4(1)    |
| N24  | 16(1)    | 19(1)    | 27(1)    | -6(1)    | -7(1)    | -3(1)    |
| C11  | 20(1)    | 31(1)    | 47(1)    | -16(1)   | -12(1)   | 0(1)     |
| C21  | 19(1)    | 26(1)    | 33(1)    | -11(1)   | -9(1)    | -1(1)    |
| C31  | 20(1)    | 23(1)    | 40(1)    | -10(1)   | -11(1)   | 2(1)     |
| C41  | 23(1)    | 21(1)    | 26(1)    | -8(1)    | -7(1)    | -2(1)    |
| C51  | 26(1)    | 20(1)    | 33(1)    | -5(1)    | -9(1)    | -2(1)    |
| C61  | 24(1)    | 50(1)    | 73(2)    | -38(1)   | -3(1)    | -4(1)    |
| C71  | 18(1)    | 38(1)    | 68(2)    | -23(1)   | -11(1)   | -1(1)    |
| C81  | 32(1)    | 57(1)    | 70(2)    | -7(1)    | -30(1)   | 1(1)     |
| C91  | 42(1)    | 25(1)    | 48(1)    | -15(1)   | -5(1)    | -5(1)    |
| C101 | 53(1)    | 36(1)    | 44(1)    | 1(1)     | -23(1)   | -9(1)    |
| C111 | 33(1)    | 20(1)    | 57(1)    | -1(1)    | -14(1)   | -7(1)    |
| C12  | 15(1)    | 23(1)    | 38(1)    | -11(1)   | -7(1)    | -3(1)    |
| C22  | 21(1)    | 31(1)    | 35(1)    | -8(1)    | -3(1)    | -7(1)    |
| C32  | 24(1)    | 33(1)    | 41(1)    | -3(1)    | -2(1)    | -11(1)   |
| C42  | 24(1)    | 25(1)    | 55(1)    | -11(1)   | -7(1)    | -9(1)    |
| C52  | 19(1)    | 28(1)    | 49(1)    | -16(1)   | -10(1)   | -5(1)    |
| C62  | 17(1)    | 24(1)    | 42(1)    | -12(1)   | -11(1)   | -2(1)    |
| C72  | 35(1)    | 41(1)    | 33(1)    | -10(1)   | -3(1)    | -14(1)   |
| C82  | 49(1)    | 73(2)    | 43(1)    | -23(1)   | 3(1)     | -18(1)   |
| C92  | 54(2)    | 76(2)    | 47(1)    | -17(1)   | -22(1)   | -9(1)    |
| C102 | 29(1)    | 27(1)    | 40(1)    | -11(1)   | -16(1)   | -2(1)    |
| C112 | 40(1)    | 60(1)    | 44(1)    | -18(1)   | -18(1)   | -11(1)   |
| C122 | 28(1)    | 102(2)   | 49(2)    | 27(2)    | -6(1)    | -3(1)    |

|      |        |       |       |        |        |        |
|------|--------|-------|-------|--------|--------|--------|
| C13  | 20(1)  | 17(1) | 31(1) | -4(1)  | -9(1)  | -4(1)  |
| C23  | 23(1)  | 23(1) | 30(1) | -6(1)  | -7(1)  | -4(1)  |
| C33  | 23(1)  | 24(1) | 38(1) | -7(1)  | -4(1)  | -4(1)  |
| C43  | 21(1)  | 18(1) | 50(1) | -6(1)  | -13(1) | -4(1)  |
| C53  | 30(1)  | 19(1) | 41(1) | -5(1)  | -19(1) | -5(1)  |
| C63  | 26(1)  | 16(1) | 31(1) | -3(1)  | -11(1) | -6(1)  |
| C73  | 27(1)  | 47(1) | 29(1) | -13(1) | -5(1)  | -7(1)  |
| C83  | 72(2)  | 49(1) | 41(1) | 4(1)   | -28(1) | -16(1) |
| C93  | 102(2) | 51(1) | 34(1) | -8(1)  | -19(1) | -34(2) |
| C103 | 33(1)  | 27(1) | 28(1) | -3(1)  | -11(1) | -11(1) |
| C113 | 44(1)  | 34(1) | 34(1) | -11(1) | -8(1)  | -13(1) |
| C123 | 65(2)  | 34(1) | 34(1) | 1(1)   | -19(1) | -19(1) |
| C14  | 15(1)  | 32(1) | 35(1) | -14(1) | -8(1)  | 0(1)   |
| C24  | 17(1)  | 26(1) | 25(1) | -9(1)  | -6(1)  | -2(1)  |
| C34  | 19(1)  | 21(1) | 34(1) | -7(1)  | -10(1) | 1(1)   |
| C44  | 20(1)  | 18(1) | 27(1) | -6(1)  | -7(1)  | -2(1)  |
| C54  | 24(1)  | 18(1) | 35(1) | -8(1)  | -9(1)  | -3(1)  |
| C64  | 21(1)  | 43(1) | 46(1) | -24(1) | -6(1)  | 1(1)   |
| C74  | 16(1)  | 40(1) | 47(1) | -19(1) | -10(1) | -3(1)  |
| C84  | 27(1)  | 43(1) | 43(1) | -11(1) | -18(1) | 2(1)   |
| C94  | 34(1)  | 28(1) | 55(1) | -20(1) | -4(1)  | -5(1)  |
| C104 | 30(1)  | 24(1) | 58(1) | -13(1) | -16(1) | -5(1)  |
| C114 | 47(1)  | 23(1) | 49(1) | -1(1)  | -21(1) | -8(1)  |
| C15  | 15(1)  | 23(1) | 31(1) | -10(1) | -4(1)  | -4(1)  |
| C25  | 18(1)  | 31(1) | 29(1) | -8(1)  | -2(1)  | -8(1)  |
| C35  | 24(1)  | 31(1) | 34(1) | -2(1)  | -6(1)  | -11(1) |
| C45  | 22(1)  | 24(1) | 42(1) | -8(1)  | -11(1) | -7(1)  |
| C55  | 22(1)  | 27(1) | 36(1) | -13(1) | -10(1) | -4(1)  |
| C65  | 19(1)  | 23(1) | 30(1) | -10(1) | -7(1)  | -4(1)  |
| C75  | 34(1)  | 41(1) | 28(1) | -11(1) | 0(1)   | -14(1) |
| C85  | 41(1)  | 62(2) | 32(1) | -12(1) | 4(1)   | -10(1) |
| C95  | 46(1)  | 70(2) | 35(1) | -16(1) | -14(1) | -9(1)  |
| C105 | 32(1)  | 29(1) | 28(1) | -10(1) | -6(1)  | -9(1)  |
| C115 | 34(1)  | 45(1) | 34(1) | -10(1) | -1(1)  | -14(1) |
| C125 | 42(1)  | 43(1) | 31(1) | -6(1)  | -13(1) | -7(1)  |
| C16  | 18(1)  | 15(1) | 31(1) | -7(1)  | -9(1)  | -2(1)  |

|      |       |       |       |        |        |        |
|------|-------|-------|-------|--------|--------|--------|
| C26  | 20(1) | 17(1) | 30(1) | -7(1)  | -6(1)  | -4(1)  |
| C36  | 19(1) | 25(1) | 36(1) | -10(1) | -5(1)  | -5(1)  |
| C46  | 19(1) | 25(1) | 47(1) | -14(1) | -14(1) | -1(1)  |
| C56  | 28(1) | 26(1) | 36(1) | -8(1)  | -17(1) | -4(1)  |
| C66  | 23(1) | 24(1) | 29(1) | -9(1)  | -10(1) | -3(1)  |
| C76  | 24(1) | 24(1) | 29(1) | -6(1)  | -7(1)  | -5(1)  |
| C86  | 44(1) | 33(1) | 32(1) | -1(1)  | -9(1)  | -15(1) |
| C96  | 50(1) | 32(1) | 35(1) | -10(1) | -17(1) | -9(1)  |
| C106 | 27(1) | 50(1) | 29(1) | -10(1) | -9(1)  | -7(1)  |
| C116 | 60(2) | 59(2) | 36(1) | 2(1)   | -10(1) | -26(1) |
| C126 | 47(1) | 70(2) | 38(1) | -26(1) | -8(1)  | -7(1)  |
| C17  | 59(2) | 65(2) | 55(2) | -19(1) | -14(1) | -7(1)  |
| C27  | 37(1) | 64(2) | 45(1) | -12(1) | -11(1) | -8(1)  |
| C37  | 44(1) | 62(2) | 38(1) | -18(1) | -10(1) | -12(1) |
| C47  | 49(1) | 65(2) | 43(1) | -15(1) | -11(1) | -19(1) |
| C57  | 52(1) | 61(2) | 47(1) | -19(1) | -13(1) | -11(1) |
| C18  | 49(1) | 51(1) | 41(1) | -14(1) | -8(1)  | -3(1)  |
| C28  | 49(1) | 42(1) | 38(1) | -5(1)  | -6(1)  | -6(1)  |
| C38  | 54(1) | 47(1) | 41(1) | -13(1) | -7(1)  | -13(1) |

---



Table 5. Hydrogen coordinates ( $\times 10^4$ ) and isotropic displacement parameters ( $\text{\AA}^2 \times 10^3$ ) for holkd18.

|      | x        | y        | z        | U(eq) |
|------|----------|----------|----------|-------|
| H1   | -2(18)   | 2380(16) | 8117(13) | 52    |
| H2   | 1460(17) | 1346(15) | 6956(13) | 50    |
| H31A | -2802    | 5663     | 7367     | 32    |
| H61A | -4261    | 4697     | 8948     | 71    |
| H61B | -5182    | 5135     | 8612     | 71    |
| H61C | -4174    | 5613     | 8335     | 71    |
| H71A | -4353    | 3280     | 8589     | 60    |
| H71B | -4222    | 3281     | 7738     | 60    |
| H71C | -5225    | 3817     | 8227     | 60    |
| H81A | -4962    | 5066     | 7259     | 78    |
| H81B | -3854    | 4703     | 6752     | 78    |
| H81C | -4027    | 5623     | 7040     | 78    |
| H91A | -1790    | 7500     | 7407     | 59    |
| H91B | -1669    | 6629     | 8038     | 59    |
| H91C | -2586    | 6786     | 7693     | 59    |
| H10A | -1415    | 7316     | 6074     | 65    |
| H10B | -2240    | 6626     | 6390     | 65    |
| H10C | -1103    | 6325     | 5889     | 65    |
| H11A | -131     | 7227     | 6631     | 56    |
| H11B | 349      | 6288     | 6364     | 56    |
| H11C | 131      | 6351     | 7215     | 56    |
| H32A | -3025    | 905      | 9336     | 42    |
| H42A | -3066    | 293      | 8376     | 42    |
| H52A | -2703    | 1140     | 7166     | 37    |
| H72A | -2593    | 3156     | 9187     | 44    |
| H82A | -4297    | 2860     | 9773     | 84    |
| H82B | -3751    | 2776     | 10388    | 84    |
| H82C | -3911    | 1886     | 10189    | 84    |
| H92A | -1222    | 2016     | 9325     | 85    |
| H92B | -2013    | 1377     | 9928     | 85    |

|      |       |       |       |     |
|------|-------|-------|-------|-----|
| H92C | -1888 | 2291  | 10110 | 85  |
| H10D | -2207 | 3432  | 6581  | 36  |
| H11D | -3548 | 2902  | 6401  | 67  |
| H11E | -2771 | 2054  | 6121  | 67  |
| H11F | -2617 | 3050  | 5643  | 67  |
| H12A | -866  | 2744  | 5661  | 106 |
| H12B | -983  | 1783  | 6214  | 106 |
| H12C | -603  | 2555  | 6426  | 106 |
| H33A | 2700  | 4575  | 5958  | 35  |
| H43A | 3248  | 4626  | 6945  | 35  |
| H53A | 2053  | 4666  | 8126  | 33  |
| H73A | 96    | 4686  | 6018  | 41  |
| H83A | 1168  | 5792  | 5233  | 79  |
| H83B | 1028  | 5130  | 4774  | 79  |
| H83C | 2062  | 4997  | 4980  | 79  |
| H93A | 890   | 3155  | 6231  | 89  |
| H93B | 1904  | 3434  | 5577  | 89  |
| H93C | 869   | 3497  | 5387  | 89  |
| H10E | -674  | 4844  | 8568  | 34  |
| H11G | 18    | 6121  | 8532  | 55  |
| H11H | 798   | 5495  | 8946  | 55  |
| H11I | -404  | 5596  | 9376  | 55  |
| H12D | 58    | 3378  | 8994  | 64  |
| H12E | -366  | 3929  | 9658  | 64  |
| H12F | 834   | 3783  | 9226  | 64  |
| H34A | 4228  | -2050 | 7374  | 29  |
| H64A | 6700  | -1513 | 6556  | 53  |
| H64B | 5914  | -984  | 6113  | 53  |
| H64C | 5725  | -1953 | 6638  | 53  |
| H74A | 5539  | 175   | 7581  | 49  |
| H74B | 5835  | 312   | 6692  | 49  |
| H74C | 6597  | -323  | 7118  | 49  |
| H84A | 5004  | -1297 | 8404  | 54  |
| H84B | 6143  | -1695 | 7975  | 54  |
| H84C | 5192  | -2144 | 8020  | 54  |
| H94A | 3483  | -3581 | 6710  | 59  |

|      |       |       |      |    |
|------|-------|-------|------|----|
| H94B | 4229  | -2956 | 6748 | 59 |
| H94C | 3511  | -2577 | 6224 | 59 |
| H10F | 1143  | -2598 | 7727 | 53 |
| H10G | 1740  | -3407 | 7301 | 53 |
| H10H | 1599  | -2401 | 6835 | 53 |
| H11J | 2283  | -2972 | 8513 | 59 |
| H11K | 3494  | -3149 | 8130 | 59 |
| H11L | 2781  | -3820 | 8116 | 59 |
| H35A | 4630  | 2769  | 5994 | 36 |
| H45A | 4497  | 3214  | 7084 | 34 |
| H55A | 3985  | 2244  | 8233 | 32 |
| H75A | 4117  | 637   | 5881 | 42 |
| H85A | 5872  | 748   | 5465 | 73 |
| H85B | 5662  | 1795  | 5108 | 73 |
| H85C | 5453  | 1047  | 4762 | 73 |
| H95A | 2903  | 1926  | 5706 | 73 |
| H95B | 3637  | 1703  | 4917 | 73 |
| H95C | 3810  | 2511  | 5216 | 73 |
| H10I | 3450  | -20   | 8531 | 35 |
| H11M | 1916  | 995   | 8737 | 58 |
| H11N | 2360  | 1558  | 9114 | 58 |
| H11O | 2133  | 549   | 9515 | 58 |
| H12G | 4857  | 212   | 8817 | 57 |
| H12H | 3904  | 95    | 9564 | 57 |
| H12I | 4213  | 1078  | 9150 | 57 |
| H36A | -1231 | -1055 | 8422 | 32 |
| H46A | -1642 | -666  | 7313 | 34 |
| H56A | -359  | -403  | 6175 | 33 |
| H76A | 1282  | -1458 | 8593 | 31 |
| H86A | 78    | -2515 | 9067 | 55 |
| H86B | -787  | -1755 | 9420 | 55 |
| H86C | 175   | -2124 | 9722 | 55 |
| H96A | 712   | 74    | 8658 | 55 |
| H96B | 469   | -525  | 9485 | 55 |
| H96C | -427  | -147  | 9113 | 55 |
| H10J | 2331  | -625  | 5913 | 41 |

|      |      |       |       |    |
|------|------|-------|-------|----|
| H11P | 1512 | 896   | 5776  | 79 |
| H11Q | 871  | 660   | 5327  | 79 |
| H11R | 2087 | 619   | 4980  | 79 |
| H12J | 1769 | -1721 | 5562  | 76 |
| H12K | 2169 | -958  | 4843  | 76 |
| H12L | 968  | -971  | 5246  | 76 |
| H17A | 7396 | 4058  | 10317 | 89 |
| H17B | 7514 | 4637  | 9491  | 89 |
| H17C | 6407 | 4607  | 10101 | 89 |
| H27A | 6856 | 5408  | 10797 | 58 |
| H27B | 7988 | 5406  | 10216 | 58 |
| H37A | 6174 | 6338  | 9893  | 56 |
| H37B | 7269 | 6282  | 9270  | 56 |
| H47A | 7855 | 7063  | 9921  | 61 |
| H47B | 6724 | 7166  | 10495 | 61 |
| H57A | 7002 | 8513  | 9592  | 77 |
| H57B | 6111 | 8084  | 9519  | 77 |
| H57C | 7237 | 7973  | 8938  | 77 |
| H18A | 6216 | 4482  | 5621  | 58 |
| H28A | 6081 | 3646  | 4825  | 55 |
| H38A | 4855 | 4159  | 4207  | 57 |

---

Table 6. Torsion angles [°] for hokld18.

|                |             |                |             |
|----------------|-------------|----------------|-------------|
| N14-Co2-K1-C33 | 92.26(7)    | N24-Co2-K1-C63 | -25.04(19)  |
| N24-Co2-K1-C33 | -138.57(16) | K2-Co2-K1-C63  | 9.73(10)    |
| K2-Co2-K1-C33  | -103.80(5)  | N14-Co2-K1-Co1 | -167.66(4)  |
| N14-Co2-K1-C55 | -10.08(5)   | N24-Co2-K1-Co1 | -38.49(16)  |
| N24-Co2-K1-C55 | 119.09(16)  | K2-Co2-K1-Co1  | -3.724(11)  |
| K2-Co2-K1-C55  | 153.86(4)   | N14-Co2-K1-K2  | -163.94(4)  |
| N14-Co2-K1-C43 | 52.55(10)   | N24-Co2-K1-K2  | -34.77(16)  |
| N24-Co2-K1-C43 | -178.28(17) | N11-Co1-K1-C33 | 121.22(19)  |
| K2-Co2-K1-C43  | -143.52(9)  | N21-Co1-K1-C33 | -12.46(6)   |
| N14-Co2-K1-C45 | 13.10(6)    | K2-Co1-K1-C33  | 145.00(4)   |
| N24-Co2-K1-C45 | 142.27(16)  | N11-Co1-K1-C55 | -132.2(2)   |
| K2-Co2-K1-C45  | 177.03(4)   | N21-Co1-K1-C55 | 94.17(9)    |
| N14-Co2-K1-C23 | 129.58(6)   | K2-Co1-K1-C55  | -108.38(8)  |
| N24-Co2-K1-C23 | -101.25(16) | N11-Co1-K1-C43 | 144.41(18)  |
| K2-Co2-K1-C23  | -66.48(5)   | N21-Co1-K1-C43 | 10.73(6)    |
| N14-Co2-K1-C65 | -16.68(5)   | K2-Co1-K1-C43  | 168.18(4)   |
| N24-Co2-K1-C65 | 112.49(16)  | N11-Co1-K1-C45 | 157.7(2)    |
| K2-Co2-K1-C65  | 147.26(4)   | N21-Co1-K1-C45 | 23.99(12)   |
| N14-Co2-K1-C35 | 32.93(6)    | K2-Co1-K1-C45  | -178.55(11) |
| N24-Co2-K1-C35 | 162.10(16)  | N11-Co1-K1-C23 | 115.01(19)  |
| K2-Co2-K1-C35  | -163.13(4)  | N21-Co1-K1-C23 | -18.66(5)   |
| N14-Co2-K1-C53 | -29.7(3)    | K2-Co1-K1-C23  | 138.79(4)   |
| N24-Co2-K1-C53 | 99.5(3)     | N11-Co1-K1-C65 | -77.62(19)  |
| K2-Co2-K1-C53  | 134.2(3)    | N21-Co1-K1-C65 | 148.70(7)   |
| N14-Co2-K1-C15 | 5.88(6)     | K2-Co1-K1-C65  | -53.84(6)   |
| N24-Co2-K1-C15 | 135.05(16)  | N11-Co1-K1-C35 | 80.8(2)     |
| K2-Co2-K1-C15  | 169.82(4)   | N21-Co1-K1-C35 | -52.91(10)  |
| N14-Co2-K1-C13 | 165.87(7)   | K2-Co1-K1-C35  | 104.55(10)  |
| N24-Co2-K1-C13 | -64.96(17)  | N11-Co1-K1-C53 | 164.43(19)  |
| K2-Co2-K1-C13  | -30.20(5)   | N21-Co1-K1-C53 | 30.76(5)    |
| N14-Co2-K1-C25 | 33.49(6)    | K2-Co1-K1-C53  | -171.79(4)  |
| N24-Co2-K1-C25 | 162.66(16)  | N11-Co1-K1-C15 | -28.9(2)    |
| K2-Co2-K1-C25  | -162.57(4)  | N21-Co1-K1-C15 | -162.60(7)  |
| N14-Co2-K1-C63 | -154.21(10) | K2-Co1-K1-C15  | -5.14(6)    |

|                |             |                |             |
|----------------|-------------|----------------|-------------|
| N11-Co1-K1-C13 | 138.38(19)  | N21-Co1-K2-C16 | 54.74(12)   |
| N21-Co1-K1-C13 | 4.71(6)     | K1-Co1-K2-C16  | -8.56(7)    |
| K2-Co1-K1-C13  | 162.16(4)   | N11-Co1-K2-C32 | -34.84(6)   |
| N11-Co1-K1-C25 | 21.5(2)     | N21-Co1-K2-C32 | -145.74(10) |
| N21-Co1-K1-C25 | -112.21(8)  | K1-Co1-K2-C32  | 150.97(4)   |
| K2-Co1-K1-C25  | 45.25(7)    | N11-Co1-K2-C22 | -34.67(6)   |
| N11-Co1-K1-C63 | 165.26(19)  | N21-Co1-K2-C22 | -145.57(10) |
| N21-Co1-K1-C63 | 31.59(5)    | K1-Co1-K2-C22  | 151.13(4)   |
| K2-Co1-K1-C63  | -170.96(4)  | N11-Co1-K2-C56 | 74.15(8)    |
| N11-Co1-K1-Co2 | -20.00(18)  | N21-Co1-K2-C56 | -36.75(12)  |
| N21-Co1-K1-Co2 | -153.68(4)  | K1-Co1-K2-C56  | -100.04(6)  |
| K2-Co1-K1-Co2  | 3.778(12)   | N11-Co1-K2-Co2 | 170.36(5)   |
| N11-Co1-K1-K2  | -23.78(18)  | N21-Co1-K2-Co2 | 59.46(10)   |
| N21-Co1-K1-K2  | -157.46(4)  | K1-Co1-K2-Co2  | -3.828(12)  |
| N11-Co1-K2-C36 | -49.97(13)  | N11-Co1-K2-K1  | 174.19(5)   |
| N21-Co1-K2-C36 | -160.87(15) | N21-Co1-K2-K1  | 63.29(10)   |
| K1-Co1-K2-C36  | 135.84(12)  | N14-Co2-K2-C36 | -112.61(13) |
| N11-Co1-K2-C52 | 6.74(6)     | N24-Co2-K2-C36 | 5.94(6)     |
| N21-Co1-K2-C52 | -104.16(10) | K1-Co2-K2-C36  | -165.26(4)  |
| K1-Co1-K2-C52  | -167.45(4)  | N14-Co2-K2-C52 | -173.22(15) |
| N11-Co1-K2-C62 | 14.45(6)    | N24-Co2-K2-C52 | -54.67(11)  |
| N21-Co1-K2-C62 | -96.45(10)  | K1-Co2-K2-C52  | 134.14(10)  |
| K1-Co1-K2-C62  | -159.74(4)  | N14-Co2-K2-C62 | 118.65(15)  |
| N11-Co1-K2-C26 | -135.46(10) | N24-Co2-K2-C62 | -122.80(9)  |
| N21-Co1-K2-C26 | 113.64(13)  | K1-Co2-K2-C62  | 66.01(8)    |
| K1-Co1-K2-C26  | 50.35(9)    | N14-Co2-K2-C26 | -104.48(13) |
| N11-Co1-K2-C46 | 23.27(10)   | N24-Co2-K2-C26 | 14.07(5)    |
| N21-Co1-K2-C46 | -87.63(13)  | K1-Co2-K2-C26  | -157.12(4)  |
| K1-Co1-K2-C46  | -150.92(9)  | N14-Co2-K2-C46 | -136.26(13) |
| N11-Co1-K2-C42 | -16.51(6)   | N24-Co2-K2-C46 | -17.71(6)   |
| N21-Co1-K2-C42 | -127.41(10) | K1-Co2-K2-C46  | 171.10(4)   |
| K1-Co1-K2-C42  | 169.30(4)   | N14-Co2-K2-C42 | -105.79(16) |
| N11-Co1-K2-C12 | -7.66(6)    | N24-Co2-K2-C42 | 12.76(11)   |
| N21-Co1-K2-C12 | -118.56(11) | K1-Co2-K2-C42  | -158.43(10) |
| K1-Co1-K2-C12  | 178.15(5)   | N14-Co2-K2-C12 | 59.65(15)   |
| N11-Co1-K2-C16 | 165.64(8)   | N24-Co2-K2-C12 | 178.20(9)   |

|                |             |               |            |
|----------------|-------------|---------------|------------|
| K1-Co2-K2-C12  | 7.00(8)     | C23-K1-K2-C52 | -16.39(7)  |
| N14-Co2-K2-C16 | -126.66(13) | C65-K1-K2-C52 | 174.38(7)  |
| N24-Co2-K2-C16 | -8.11(6)    | C35-K1-K2-C52 | -133.75(7) |
| K1-Co2-K2-C16  | -179.30(4)  | C53-K1-K2-C52 | 30.47(8)   |
| N14-Co2-K2-C32 | -46.93(15)  | C15-K1-K2-C52 | -163.02(7) |
| N24-Co2-K2-C32 | 71.62(9)    | C13-K1-K2-C52 | 7.12(7)    |
| K1-Co2-K2-C32  | -99.58(8)   | C25-K1-K2-C52 | -140.63(7) |
| N14-Co2-K2-C22 | 6.39(15)    | C63-K1-K2-C52 | 27.58(7)   |
| N24-Co2-K2-C22 | 124.94(8)   | Co2-K1-K2-C52 | -155.78(6) |
| K1-Co2-K2-C22  | -46.26(7)   | Co1-K1-K2-C52 | 19.64(6)   |
| N14-Co2-K2-C56 | -154.05(13) | C33-K1-K2-C62 | -25.02(6)  |
| N24-Co2-K2-C56 | -35.50(5)   | C55-K1-K2-C62 | 168.44(6)  |
| K1-Co2-K2-C56  | 153.30(3)   | C43-K1-K2-C62 | -0.75(8)   |
| N14-Co2-K2-Co1 | 56.50(12)   | C45-K1-K2-C62 | -160.99(8) |
| N24-Co2-K2-Co1 | 175.05(4)   | C23-K1-K2-C62 | -16.15(5)  |
| K1-Co2-K2-Co1  | 3.860(12)   | C65-K1-K2-C62 | 174.62(5)  |
| N14-Co2-K2-K1  | 52.65(12)   | C35-K1-K2-C62 | -133.51(6) |
| N24-Co2-K2-K1  | 171.19(4)   | C53-K1-K2-C62 | 30.70(6)   |
| C33-K1-K2-C36  | 152.48(7)   | C15-K1-K2-C62 | -162.78(5) |
| C55-K1-K2-C36  | -14.06(7)   | C13-K1-K2-C62 | 7.36(5)    |
| C43-K1-K2-C36  | 176.75(8)   | C25-K1-K2-C62 | -140.39(5) |
| C45-K1-K2-C36  | 16.51(9)    | C63-K1-K2-C62 | 27.82(5)   |
| C23-K1-K2-C36  | 161.35(6)   | Co2-K1-K2-C62 | -155.54(4) |
| C65-K1-K2-C36  | -7.88(6)    | Co1-K1-K2-C62 | 19.87(4)   |
| C35-K1-K2-C36  | 43.99(7)    | C33-K1-K2-C26 | 152.22(5)  |
| C53-K1-K2-C36  | -151.80(7)  | C55-K1-K2-C26 | -14.32(6)  |
| C15-K1-K2-C36  | 14.72(6)    | C43-K1-K2-C26 | 176.49(7)  |
| C13-K1-K2-C36  | -175.14(6)  | C45-K1-K2-C26 | 16.25(8)   |
| C25-K1-K2-C36  | 37.11(7)    | C23-K1-K2-C26 | 161.09(5)  |
| C63-K1-K2-C36  | -154.68(6)  | C65-K1-K2-C26 | -8.14(5)   |
| Co2-K1-K2-C36  | 21.96(5)    | C35-K1-K2-C26 | 43.73(6)   |
| Co1-K1-K2-C36  | -162.62(6)  | C53-K1-K2-C26 | -152.06(6) |
| C33-K1-K2-C52  | -25.26(8)   | C15-K1-K2-C26 | 14.45(5)   |
| C55-K1-K2-C52  | 168.20(7)   | C13-K1-K2-C26 | -175.40(5) |
| C43-K1-K2-C52  | -0.99(9)    | C25-K1-K2-C26 | 36.85(5)   |
| C45-K1-K2-C52  | -161.23(9)  | C63-K1-K2-C26 | -154.95(5) |

|               |            |               |            |
|---------------|------------|---------------|------------|
| Co2-K1-K2-C26 | 21.70(3)   | C35-K1-K2-C12 | -154.74(6) |
| Co1-K1-K2-C26 | -162.89(4) | C53-K1-K2-C12 | 9.47(6)    |
| C33-K1-K2-C46 | 114.59(8)  | C15-K1-K2-C12 | 175.98(4)  |
| C55-K1-K2-C46 | -51.94(8)  | C13-K1-K2-C12 | -13.87(5)  |
| C43-K1-K2-C46 | 138.87(9)  | C25-K1-K2-C12 | -161.62(5) |
| C45-K1-K2-C46 | -21.37(10) | C63-K1-K2-C12 | 6.58(5)    |
| C23-K1-K2-C46 | 123.47(7)  | Co2-K1-K2-C12 | -176.77(3) |
| C65-K1-K2-C46 | -45.76(7)  | Co1-K1-K2-C12 | -1.36(3)   |
| C35-K1-K2-C46 | 6.11(8)    | C33-K1-K2-C16 | 131.02(5)  |
| C53-K1-K2-C46 | 170.32(7)  | C55-K1-K2-C16 | -35.52(6)  |
| C15-K1-K2-C46 | -23.17(7)  | C43-K1-K2-C16 | 155.29(7)  |
| C13-K1-K2-C46 | 146.98(7)  | C45-K1-K2-C16 | -4.95(7)   |
| C25-K1-K2-C46 | -0.78(7)   | C23-K1-K2-C16 | 139.89(4)  |
| C63-K1-K2-C46 | 167.43(7)  | C65-K1-K2-C16 | -29.34(4)  |
| Co2-K1-K2-C46 | -15.92(6)  | C35-K1-K2-C16 | 22.53(6)   |
| Co1-K1-K2-C46 | 159.49(7)  | C53-K1-K2-C16 | -173.26(5) |
| C33-K1-K2-C42 | -65.03(9)  | C15-K1-K2-C16 | -6.74(4)   |
| C55-K1-K2-C42 | 128.43(9)  | C13-K1-K2-C16 | 163.40(4)  |
| C43-K1-K2-C42 | -40.75(10) | C25-K1-K2-C16 | 15.65(5)   |
| C45-K1-K2-C42 | 159.00(10) | C63-K1-K2-C16 | -176.14(4) |
| C23-K1-K2-C42 | -56.15(8)  | Co2-K1-K2-C16 | 0.50(3)    |
| C65-K1-K2-C42 | 134.62(8)  | Co1-K1-K2-C16 | 175.92(3)  |
| C35-K1-K2-C42 | -173.52(8) | C33-K1-K2-C32 | -81.60(6)  |
| C53-K1-K2-C42 | -9.30(9)   | C55-K1-K2-C32 | 111.86(6)  |
| C15-K1-K2-C42 | 157.21(8)  | C43-K1-K2-C32 | -57.33(8)  |
| C13-K1-K2-C42 | -32.64(8)  | C45-K1-K2-C32 | 142.43(8)  |
| C25-K1-K2-C42 | 179.60(8)  | C23-K1-K2-C32 | -72.73(6)  |
| C63-K1-K2-C42 | -12.19(8)  | C65-K1-K2-C32 | 118.04(6)  |
| Co2-K1-K2-C42 | 164.45(8)  | C35-K1-K2-C32 | 169.91(6)  |
| Co1-K1-K2-C42 | -20.13(7)  | C53-K1-K2-C32 | -25.88(7)  |
| C33-K1-K2-C12 | -46.25(6)  | C15-K1-K2-C32 | 140.64(5)  |
| C55-K1-K2-C12 | 147.21(6)  | C13-K1-K2-C32 | -49.22(6)  |
| C43-K1-K2-C12 | -21.98(8)  | C25-K1-K2-C32 | 163.03(6)  |
| C45-K1-K2-C12 | 177.78(7)  | C63-K1-K2-C32 | -28.76(6)  |
| C23-K1-K2-C12 | -37.38(5)  | Co2-K1-K2-C32 | 147.88(5)  |
| C65-K1-K2-C12 | 153.39(5)  | Co1-K1-K2-C32 | -36.71(5)  |



|               |            |                 |              |
|---------------|------------|-----------------|--------------|
| C33-K1-K2-C22 | -69.89(6)  | C15-K1-K2-Co1   | 177.34(3)    |
| C55-K1-K2-C22 | 123.57(6)  | C13-K1-K2-Co1   | -12.51(3)    |
| C43-K1-K2-C22 | -45.62(8)  | C25-K1-K2-Co1   | -160.27(4)   |
| C45-K1-K2-C22 | 154.14(7)  | C63-K1-K2-Co1   | 7.94(3)      |
| C23-K1-K2-C22 | -61.02(5)  | Co2-K1-K2-Co1   | -175.416(14) |
| C65-K1-K2-C22 | 129.75(5)  | C33-K1-K2-Co2   | 130.52(5)    |
| C35-K1-K2-C22 | -178.38(6) | C55-K1-K2-Co2   | -36.02(5)    |
| C53-K1-K2-C22 | -14.16(6)  | C43-K1-K2-Co2   | 154.79(7)    |
| C15-K1-K2-C22 | 152.35(5)  | C45-K1-K2-Co2   | -5.45(7)     |
| C13-K1-K2-C22 | -37.51(5)  | C23-K1-K2-Co2   | 139.39(3)    |
| C25-K1-K2-C22 | 174.74(5)  | C65-K1-K2-Co2   | -29.84(3)    |
| C63-K1-K2-C22 | -17.05(5)  | C35-K1-K2-Co2   | 22.03(5)     |
| Co2-K1-K2-C22 | 159.59(4)  | C53-K1-K2-Co2   | -173.76(5)   |
| Co1-K1-K2-C22 | -24.99(3)  | C15-K1-K2-Co2   | -7.24(3)     |
| C33-K1-K2-C56 | 97.72(6)   | C13-K1-K2-Co2   | 162.90(3)    |
| C55-K1-K2-C56 | -68.81(6)  | C25-K1-K2-Co2   | 15.15(3)     |
| C43-K1-K2-C56 | 122.00(8)  | C63-K1-K2-Co2   | -176.64(3)   |
| C45-K1-K2-C56 | -38.24(8)  | Co1-K1-K2-Co2   | 175.416(14)  |
| C23-K1-K2-C56 | 106.60(5)  | N21-Co1-N11-C21 | -6.49(15)    |
| C65-K1-K2-C56 | -62.63(5)  | K2-Co1-N11-C21  | -162.72(14)  |
| C35-K1-K2-C56 | -10.76(6)  | K1-Co1-N11-C21  | -139.85(15)  |
| C53-K1-K2-C56 | 153.45(6)  | N21-Co1-N11-C12 | 170.01(11)   |
| C15-K1-K2-C56 | -40.04(5)  | K2-Co1-N11-C12  | 13.78(11)    |
| C13-K1-K2-C56 | 130.11(5)  | K1-Co1-N11-C12  | 36.7(3)      |
| C25-K1-K2-C56 | -17.65(5)  | N11-Co1-N21-C41 | 3.74(15)     |
| C63-K1-K2-C56 | 150.56(5)  | K2-Co1-N21-C41  | 113.70(14)   |
| Co2-K1-K2-C56 | -32.80(4)  | K1-Co1-N21-C41  | 173.22(13)   |
| Co1-K1-K2-C56 | 142.62(4)  | N11-Co1-N21-C13 | -177.81(11)  |
| C33-K1-K2-Co1 | -44.90(4)  | K2-Co1-N21-C13  | -67.86(15)   |
| C55-K1-K2-Co1 | 148.57(5)  | K1-Co1-N21-C13  | -8.34(10)    |
| C43-K1-K2-Co1 | -20.62(7)  | N24-Co2-N14-C24 | 2.98(15)     |
| C45-K1-K2-Co1 | 179.14(7)  | K2-Co2-N14-C24  | 120.99(14)   |
| C23-K1-K2-Co1 | -36.02(3)  | K1-Co2-N14-C24  | 170.91(14)   |
| C65-K1-K2-Co1 | 154.75(3)  | N24-Co2-N14-C15 | -178.39(11)  |
| C35-K1-K2-Co1 | -153.38(5) | K2-Co2-N14-C15  | -60.39(18)   |
| C53-K1-K2-Co1 | 10.83(5)   | K1-Co2-N14-C15  | -10.47(10)   |

|                  |             |                |             |
|------------------|-------------|----------------|-------------|
| N14-Co2-N24-C44  | -1.40(15)   | C36-K2-C12-C62 | -66.56(11)  |
| K2-Co2-N24-C44   | -163.50(13) | C52-K2-C12-C62 | -32.23(10)  |
| K1-Co2-N24-C44   | -130.22(14) | C26-K2-C12-C62 | -81.55(13)  |
| N14-Co2-N24-C16  | 176.65(11)  | C46-K2-C12-C62 | -40.39(11)  |
| K2-Co2-N24-C16   | 14.55(10)   | C42-K2-C12-C62 | -65.02(11)  |
| K1-Co2-N24-C16   | 47.8(2)     | C16-K2-C12-C62 | -43.33(19)  |
| C12-N11-C21-C31  | -169.90(17) | C32-K2-C12-C62 | -96.13(11)  |
| Co1-N11-C21-C31  | 5.9(2)      | C22-K2-C12-C62 | -124.92(15) |
| C12-N11-C21-C11  | 13.7(3)     | C56-K2-C12-C62 | -17.09(12)  |
| Co1-N11-C21-C11  | -170.43(13) | Co1-K2-C12-C62 | 126.57(11)  |
| C71-C11-C21-N11  | -6.3(3)     | Co2-K2-C12-C62 | 122.40(10)  |
| C61-C11-C21-N11  | 114.2(2)    | K1-K2-C12-C62  | 128.09(10)  |
| C81-C11-C21-N11  | -126.7(2)   | C36-K2-C12-C22 | 58.36(11)   |
| C71-C11-C21-C31  | 177.14(18)  | C52-K2-C12-C22 | 92.69(11)   |
| C61-C11-C21-C31  | -62.3(2)    | C62-K2-C12-C22 | 124.92(15)  |
| C81-C11-C21-C31  | 56.7(2)     | C26-K2-C12-C22 | 43.38(13)   |
| N11-C21-C31-C41  | -0.9(3)     | C46-K2-C12-C22 | 84.53(11)   |
| C11-C21-C31-C41  | 175.82(19)  | C42-K2-C12-C22 | 59.90(10)   |
| C13-N21-C41-C31  | -178.60(16) | C16-K2-C12-C22 | 81.59(18)   |
| Co1-N21-C41-C31  | -0.5(2)     | C32-K2-C12-C22 | 28.79(10)   |
| C13-N21-C41-C51  | -0.2(3)     | C56-K2-C12-C22 | 107.84(10)  |
| Co1-N21-C41-C51  | 177.95(12)  | Co1-K2-C12-C22 | -108.51(11) |
| C21-C31-C41-N21  | -2.0(3)     | Co2-K2-C12-C22 | -112.67(10) |
| C21-C31-C41-C51  | 179.37(19)  | K1-K2-C12-C22  | -106.99(10) |
| N21-C41-C51-C111 | 1.1(3)      | C36-K2-C12-N11 | 177.94(11)  |
| C31-C41-C51-C111 | 179.61(17)  | C52-K2-C12-N11 | -147.73(15) |
| N21-C41-C51-C91  | -118.56(19) | C62-K2-C12-N11 | -115.50(17) |
| C31-C41-C51-C91  | 59.9(2)     | C26-K2-C12-N11 | 162.95(10)  |
| N21-C41-C51-C101 | 122.17(19)  | C46-K2-C12-N11 | -155.89(11) |
| C31-C41-C51-C101 | -59.3(2)    | C42-K2-C12-N11 | 179.48(14)  |
| C21-N11-C12-C62  | 81.5(2)     | C16-K2-C12-N11 | -158.83(12) |
| Co1-N11-C12-C62  | -94.85(15)  | C32-K2-C12-N11 | 148.37(15)  |
| C21-N11-C12-C22  | -104.6(2)   | C22-K2-C12-N11 | 119.58(17)  |
| Co1-N11-C12-C22  | 79.06(16)   | C56-K2-C12-N11 | -132.58(11) |
| C21-N11-C12-K2   | 160.74(14)  | Co1-K2-C12-N11 | 11.07(9)    |
| Co1-N11-C12-K2   | -15.65(12)  | Co2-K2-C12-N11 | 6.91(17)    |

|                 |             |                 |             |
|-----------------|-------------|-----------------|-------------|
| K1-K2-C12-N11   | 12.59(12)   | C26-K2-C22-C72  | 91.30(14)   |
| C62-C12-C22-C32 | -0.5(2)     | C46-K2-C22-C72  | 137.45(14)  |
| N11-C12-C22-C32 | -174.35(15) | C42-K2-C22-C72  | 144.03(17)  |
| K2-C12-C22-C32  | -63.57(15)  | C12-K2-C22-C72  | -118.29(18) |
| C62-C12-C22-C72 | 179.53(16)  | C16-K2-C22-C72  | 98.03(15)   |
| N11-C12-C22-C72 | 5.6(2)      | C32-K2-C22-C72  | 115.8(2)    |
| K2-C12-C22-C72  | 116.41(16)  | C56-K2-C22-C72  | 152.75(13)  |
| C62-C12-C22-K2  | 63.12(13)   | Co1-K2-C22-C72  | -63.78(13)  |
| N11-C12-C22-K2  | -110.78(14) | Co2-K2-C22-C72  | -2.95(19)   |
| C36-K2-C22-C32  | -4.18(13)   | K1-K2-C22-C72   | -39.89(14)  |
| C52-K2-C22-C32  | 61.05(12)   | C12-C22-C32-C42 | -1.5(3)     |
| C62-K2-C22-C32  | 95.49(13)   | C72-C22-C32-C42 | 178.53(17)  |
| C26-K2-C22-C32  | -24.51(14)  | K2-C22-C32-C42  | -63.10(17)  |
| C46-K2-C22-C32  | 21.64(13)   | C12-C22-C32-K2  | 61.61(14)   |
| C42-K2-C22-C32  | 28.22(11)   | C72-C22-C32-K2  | -118.37(16) |
| C12-K2-C22-C32  | 125.90(17)  | C36-K2-C32-C42  | -56.28(12)  |
| C16-K2-C22-C32  | -17.78(16)  | C52-K2-C32-C42  | 30.91(11)   |
| C56-K2-C22-C32  | 36.94(14)   | C62-K2-C32-C42  | 65.12(12)   |
| Co1-K2-C22-C32  | -179.59(13) | C26-K2-C32-C42  | -72.84(12)  |
| Co2-K2-C22-C32  | -118.76(12) | C46-K2-C32-C42  | -31.69(12)  |
| K1-K2-C22-C32   | -155.70(11) | C12-K2-C32-C42  | 98.33(14)   |
| C36-K2-C22-C12  | -130.08(10) | C16-K2-C32-C42  | -63.66(13)  |
| C52-K2-C22-C12  | -64.85(10)  | C22-K2-C32-C42  | 127.76(19)  |
| C62-K2-C22-C12  | -30.41(9)   | C56-K2-C32-C42  | -22.06(13)  |
| C26-K2-C22-C12  | -150.41(9)  | Co1-K2-C32-C42  | 128.11(12)  |
| C46-K2-C22-C12  | -104.26(10) | Co2-K2-C32-C42  | -122.64(12) |
| C42-K2-C22-C12  | -97.68(12)  | K1-K2-C32-C42   | 157.36(10)  |
| C16-K2-C22-C12  | -143.68(10) | C36-K2-C32-C22  | 175.96(12)  |
| C32-K2-C22-C12  | -125.90(17) | C52-K2-C32-C22  | -96.85(13)  |
| C56-K2-C22-C12  | -88.96(11)  | C62-K2-C32-C22  | -62.64(12)  |
| Co1-K2-C22-C12  | 54.51(9)    | C26-K2-C32-C22  | 159.40(12)  |
| Co2-K2-C22-C12  | 115.34(10)  | C46-K2-C32-C22  | -159.45(12) |
| K1-K2-C22-C12   | 78.40(10)   | C42-K2-C32-C22  | -127.76(19) |
| C36-K2-C22-C72  | 111.63(14)  | C12-K2-C32-C22  | -29.43(10)  |
| C52-K2-C22-C72  | 176.86(16)  | C16-K2-C32-C22  | 168.58(11)  |
| C62-K2-C22-C72  | -148.70(16) | C56-K2-C32-C22  | -149.82(11) |

|                 |             |                  |             |
|-----------------|-------------|------------------|-------------|
| Co1-K2-C32-C22  | 0.35(11)    | C46-K2-C52-C42   | 79.06(11)   |
| Co2-K2-C32-C22  | 109.60(12)  | C12-K2-C52-C42   | -92.87(13)  |
| K1-K2-C32-C22   | 29.60(14)   | C16-K2-C52-C42   | 83.17(12)   |
| C22-C32-C42-C52 | 1.9(3)      | C32-K2-C52-C42   | -29.66(10)  |
| K2-C32-C42-C52  | -64.77(15)  | C22-K2-C52-C42   | -60.81(11)  |
| C22-C32-C42-K2  | 66.62(17)   | C56-K2-C52-C42   | 99.93(11)   |
| C36-K2-C42-C52  | -117.19(12) | Co1-K2-C52-C42   | -108.03(11) |
| C62-K2-C42-C52  | 30.87(10)   | Co2-K2-C52-C42   | 118.95(13)  |
| C26-K2-C42-C52  | -125.57(11) | K1-K2-C52-C42    | -123.76(10) |
| C46-K2-C42-C52  | -90.98(11)  | C36-K2-C52-C62   | -177.95(12) |
| C12-K2-C42-C52  | 64.22(11)   | C26-K2-C52-C62   | -177.02(11) |
| C16-K2-C42-C52  | -108.51(11) | C46-K2-C52-C62   | -156.67(13) |
| C32-K2-C42-C52  | 123.81(17)  | C42-K2-C52-C62   | 124.27(17)  |
| C22-K2-C42-C52  | 95.82(12)   | C12-K2-C52-C62   | 31.39(10)   |
| C56-K2-C42-C52  | -77.22(11)  | C16-K2-C52-C62   | -152.57(11) |
| Co1-K2-C42-C52  | 72.60(11)   | C32-K2-C52-C62   | 94.61(13)   |
| Co2-K2-C42-C52  | -124.41(11) | C22-K2-C52-C62   | 63.46(11)   |
| K1-K2-C42-C52   | 88.78(13)   | C56-K2-C52-C62   | -135.80(12) |
| C36-K2-C42-C32  | 119.00(13)  | Co1-K2-C52-C62   | 16.24(11)   |
| C52-K2-C42-C32  | -123.81(17) | Co2-K2-C52-C62   | -116.78(12) |
| C62-K2-C42-C32  | -92.94(13)  | K1-K2-C52-C62    | 0.50(15)    |
| C26-K2-C42-C32  | 110.62(12)  | C42-C52-C62-C12  | -1.6(3)     |
| C46-K2-C42-C32  | 145.20(13)  | K2-C52-C62-C12   | -76.27(14)  |
| C12-K2-C42-C32  | -59.59(11)  | C42-C52-C62-C102 | 175.38(16)  |
| C16-K2-C42-C32  | 127.68(11)  | K2-C52-C62-C102  | 100.74(14)  |
| C22-K2-C42-C32  | -27.99(11)  | C42-C52-C62-K2   | 74.64(16)   |
| C56-K2-C42-C32  | 158.96(12)  | C22-C12-C62-C52  | 2.0(2)      |
| Co1-K2-C42-C32  | -51.21(12)  | N11-C12-C62-C52  | 175.86(14)  |
| Co2-K2-C42-C32  | 111.78(13)  | K2-C12-C62-C52   | 71.92(14)   |
| K1-K2-C42-C32   | -35.03(16)  | C22-C12-C62-C102 | -174.96(15) |
| C32-C42-C52-C62 | -0.3(3)     | N11-C12-C62-C102 | -1.1(2)     |
| K2-C42-C52-C62  | -71.32(15)  | K2-C12-C62-C102  | -104.99(15) |
| C32-C42-C52-K2  | 71.06(16)   | C22-C12-C62-K2   | -69.97(14)  |
| C36-K2-C52-C42  | 57.78(11)   | N11-C12-C62-K2   | 103.93(13)  |
| C62-K2-C52-C42  | -124.27(17) | C36-K2-C62-C52   | 2.14(13)    |
| C26-K2-C52-C42  | 58.71(12)   | C26-K2-C62-C52   | 3.92(14)    |

|                 |             |                   |             |
|-----------------|-------------|-------------------|-------------|
| C46-K2-C62-C52  | 21.78(12)   | C12-C22-C72-C92   | -115.8(2)   |
| C42-K2-C62-C52  | -29.61(11)  | K2-C22-C72-C92    | -27.1(2)    |
| C12-K2-C62-C52  | -121.35(17) | C32-C22-C72-C82   | -59.8(3)    |
| C16-K2-C62-C52  | 38.99(15)   | C12-C22-C72-C82   | 120.3(2)    |
| C32-K2-C62-C52  | -61.10(12)  | K2-C22-C72-C82    | -151.02(15) |
| C22-K2-C62-C52  | -92.22(13)  | C52-C62-C102-C112 | 45.4(2)     |
| C56-K2-C62-C52  | 44.22(12)   | C12-C62-C102-C112 | -137.72(17) |
| Co1-K2-C62-C52  | -161.79(12) | K2-C62-C102-C112  | 128.92(14)  |
| Co2-K2-C62-C52  | 127.02(11)  | C52-C62-C102-C122 | -76.7(2)    |
| K1-K2-C62-C52   | -179.64(10) | C12-C62-C102-C122 | 100.2(2)    |
| C36-K2-C62-C12  | 123.49(10)  | K2-C62-C102-C122  | 6.9(2)      |
| C52-K2-C62-C12  | 121.35(17)  | C41-N21-C13-C23   | -89.4(2)    |
| C26-K2-C62-C12  | 125.26(10)  | Co1-N21-C13-C23   | 92.19(15)   |
| C46-K2-C62-C12  | 143.12(10)  | C41-N21-C13-C63   | 96.8(2)     |
| C42-K2-C62-C12  | 91.74(12)   | Co1-N21-C13-C63   | -81.61(15)  |
| C16-K2-C62-C12  | 160.34(9)   | C41-N21-C13-K1    | -171.86(13) |
| C32-K2-C62-C12  | 60.24(10)   | Co1-N21-C13-K1    | 9.74(12)    |
| C22-K2-C62-C12  | 29.12(9)    | C33-K1-C13-C23    | 31.52(10)   |
| C56-K2-C62-C12  | 165.57(10)  | C55-K1-C13-C23    | 89.59(11)   |
| Co1-K2-C62-C12  | -40.45(9)   | C43-K1-C13-C23    | 64.99(10)   |
| Co2-K2-C62-C12  | -111.63(11) | C45-K1-C13-C23    | 64.04(11)   |
| K1-K2-C62-C12   | -58.30(11)  | C65-K1-C13-C23    | 100.02(13)  |
| C36-K2-C62-C102 | -114.89(11) | C35-K1-C13-C23    | 36.56(11)   |
| C52-K2-C62-C102 | -117.03(17) | C53-K1-C13-C23    | 97.50(11)   |
| C26-K2-C62-C102 | -113.12(11) | C15-K1-C13-C23    | 32.8(2)     |
| C46-K2-C62-C102 | -95.25(11)  | C25-K1-C13-C23    | 17.13(13)   |
| C42-K2-C62-C102 | -146.64(13) | C63-K1-C13-C23    | 126.46(14)  |
| C12-K2-C62-C102 | 121.62(16)  | Co2-K1-C13-C23    | -85.12(10)  |
| C16-K2-C62-C102 | -78.04(12)  | Co1-K1-C13-C23    | -122.87(11) |
| C32-K2-C62-C102 | -178.14(13) | K2-K1-C13-C23     | -108.87(9)  |
| C22-K2-C62-C102 | 150.75(13)  | C33-K1-C13-C63    | -94.94(11)  |
| C56-K2-C62-C102 | -72.81(11)  | C55-K1-C13-C63    | -36.87(12)  |
| Co1-K2-C62-C102 | 81.17(10)   | C43-K1-C13-C63    | -61.47(10)  |
| Co2-K2-C62-C102 | 9.99(16)    | C45-K1-C13-C63    | -62.42(11)  |
| K1-K2-C62-C102  | 63.32(11)   | C23-K1-C13-C63    | -126.46(14) |
| C32-C22-C72-C92 | 64.1(2)     | C65-K1-C13-C63    | -26.44(15)  |

|                 |             |                 |             |
|-----------------|-------------|-----------------|-------------|
| C35-K1-C13-C63  | -89.90(10)  | C13-K1-C23-C33  | 122.49(16)  |
| C53-K1-C13-C63  | -28.96(9)   | C25-K1-C23-C33  | -45.46(12)  |
| C15-K1-C13-C63  | -93.62(18)  | C63-K1-C23-C33  | 93.87(12)   |
| C25-K1-C13-C63  | -109.33(11) | Co2-K1-C23-C33  | -114.28(10) |
| Co2-K1-C13-C63  | 148.42(8)   | Co1-K1-C23-C33  | 165.21(12)  |
| Co1-K1-C13-C63  | 110.67(10)  | K2-K1-C23-C33   | -162.77(10) |
| K2-K1-C13-C63   | 124.67(9)   | C33-K1-C23-C13  | -122.49(16) |
| C33-K1-C13-N21  | 147.43(14)  | C55-K1-C23-C13  | -109.48(10) |
| C55-K1-C13-N21  | -154.50(10) | C43-K1-C23-C13  | -92.44(11)  |
| C43-K1-C13-N21  | -179.10(14) | C45-K1-C23-C13  | -124.14(10) |
| C45-K1-C13-N21  | 179.95(11)  | C65-K1-C23-C13  | -125.13(10) |
| C23-K1-C13-N21  | 115.91(16)  | C35-K1-C23-C13  | -148.97(9)  |
| C65-K1-C13-N21  | -144.07(11) | C53-K1-C23-C13  | -59.78(10)  |
| C35-K1-C13-N21  | 152.47(10)  | C15-K1-C23-C13  | -166.22(9)  |
| C53-K1-C13-N21  | -146.59(14) | C25-K1-C23-C13  | -167.95(9)  |
| C15-K1-C13-N21  | 148.75(14)  | C63-K1-C23-C13  | -28.62(9)   |
| C25-K1-C13-N21  | 133.04(11)  | Co2-K1-C23-C13  | 123.23(9)   |
| C63-K1-C13-N21  | -117.63(16) | Co1-K1-C23-C13  | 42.72(8)    |
| Co2-K1-C13-N21  | 30.79(14)   | K2-K1-C23-C13   | 74.75(9)    |
| Co1-K1-C13-N21  | -6.96(9)    | C33-K1-C23-C73  | 116.60(17)  |
| K2-K1-C13-N21   | 7.03(11)    | C55-K1-C23-C73  | 129.60(11)  |
| C63-C13-C23-C33 | -1.8(2)     | C43-K1-C23-C73  | 146.64(14)  |
| N21-C13-C23-C33 | -175.57(15) | C45-K1-C23-C73  | 114.94(11)  |
| K1-C13-C23-C33  | -67.50(14)  | C65-K1-C23-C73  | 113.95(12)  |
| C63-C13-C23-C73 | 176.52(16)  | C35-K1-C23-C73  | 90.11(12)   |
| N21-C13-C23-C73 | 2.7(2)      | C53-K1-C23-C73  | 179.30(14)  |
| K1-C13-C23-C73  | 110.82(16)  | C15-K1-C23-C73  | 72.86(13)   |
| C63-C13-C23-K1  | 65.71(14)   | C13-K1-C23-C73  | -120.92(16) |
| N21-C13-C23-K1  | -108.07(13) | C25-K1-C23-C73  | 71.13(12)   |
| C55-K1-C23-C33  | 13.01(13)   | C63-K1-C23-C73  | -149.53(14) |
| C43-K1-C23-C33  | 30.05(10)   | Co2-K1-C23-C73  | 2.31(14)    |
| C45-K1-C23-C33  | -1.65(12)   | Co1-K1-C23-C73  | -78.20(11)  |
| C65-K1-C23-C33  | -2.65(16)   | K2-K1-C23-C73   | -46.17(11)  |
| C35-K1-C23-C33  | -26.48(12)  | C13-C23-C33-C43 | 1.3(3)      |
| C53-K1-C23-C33  | 62.71(11)   | C73-C23-C33-C43 | -177.04(16) |
| C15-K1-C23-C33  | -43.74(14)  | K1-C23-C33-C43  | -71.92(16)  |

|                 |             |                 |             |
|-----------------|-------------|-----------------|-------------|
| C13-C23-C33-K1  | 73.21(14)   | C53-K1-C43-C33  | -122.59(16) |
| C73-C23-C33-K1  | -105.13(15) | C15-K1-C43-C33  | 108.18(10)  |
| C55-K1-C33-C43  | -44.50(11)  | C13-K1-C43-C33  | -62.47(10)  |
| C45-K1-C33-C43  | -56.86(10)  | C25-K1-C43-C33  | 89.22(11)   |
| C23-K1-C33-C43  | 124.77(17)  | C63-K1-C43-C33  | -94.13(11)  |
| C65-K1-C33-C43  | -56.90(12)  | Co2-K1-C43-C33  | 73.20(13)   |
| C35-K1-C33-C43  | -81.61(11)  | Co1-K1-C43-C33  | -68.02(10)  |
| C53-K1-C33-C43  | 30.72(10)   | K2-K1-C43-C33   | -51.89(13)  |
| C15-K1-C33-C43  | -85.53(11)  | C33-K1-C43-C53  | 122.59(16)  |
| C13-K1-C33-C43  | 94.05(12)   | C55-K1-C43-C53  | -101.19(11) |
| C25-K1-C33-C43  | -95.06(11)  | C45-K1-C43-C53  | -120.79(11) |
| C63-K1-C33-C43  | 62.19(10)   | C23-K1-C43-C53  | 92.66(11)   |
| Co2-K1-C33-C43  | -141.15(9)  | C65-K1-C43-C53  | -104.65(10) |
| Co1-K1-C33-C43  | 111.85(10)  | C35-K1-C43-C53  | -144.36(11) |
| K2-K1-C33-C43   | 145.71(9)   | C15-K1-C43-C53  | -129.23(10) |
| C55-K1-C33-C23  | -169.27(11) | C13-K1-C43-C53  | 60.12(10)   |
| C43-K1-C33-C23  | -124.77(17) | C25-K1-C43-C53  | -148.18(10) |
| C45-K1-C33-C23  | 178.38(11)  | C63-K1-C43-C53  | 28.46(9)    |
| C65-K1-C33-C23  | 178.34(10)  | Co2-K1-C43-C53  | -164.21(8)  |
| C35-K1-C33-C23  | 153.62(11)  | Co1-K1-C43-C53  | 54.58(10)   |
| C53-K1-C33-C23  | -94.04(12)  | K2-K1-C43-C53   | 70.71(13)   |
| C15-K1-C33-C23  | 149.71(10)  | C33-C43-C53-C63 | -1.8(2)     |
| C13-K1-C33-C23  | -30.72(10)  | K1-C43-C53-C63  | -70.49(15)  |
| C25-K1-C33-C23  | 140.17(11)  | C33-C43-C53-K1  | 68.66(14)   |
| C63-K1-C33-C23  | -62.57(10)  | C33-K1-C53-C63  | 94.76(12)   |
| Co2-K1-C33-C23  | 94.08(11)   | C55-K1-C53-C63  | -156.72(11) |
| Co1-K1-C33-C23  | -12.92(10)  | C43-K1-C53-C63  | 126.21(16)  |
| K2-K1-C33-C23   | 20.95(12)   | C45-K1-C53-C63  | 179.52(11)  |
| C23-C33-C43-C53 | 0.5(3)      | C23-K1-C53-C63  | 61.50(10)   |
| K1-C33-C43-C53  | -72.45(14)  | C65-K1-C53-C63  | -149.50(10) |
| C23-C33-C43-K1  | 72.94(16)   | C35-K1-C53-C63  | 161.07(11)  |
| C55-K1-C43-C33  | 136.22(11)  | C15-K1-C53-C63  | -169.42(10) |
| C45-K1-C43-C33  | 116.62(11)  | C13-K1-C53-C63  | 29.32(9)    |
| C23-K1-C43-C33  | -29.93(10)  | C25-K1-C53-C63  | 163.25(10)  |
| C65-K1-C43-C33  | 132.75(10)  | Co2-K1-C53-C63  | -137.2(3)   |
| C35-K1-C43-C33  | 93.05(11)   | Co1-K1-C53-C63  | 1.74(10)    |

|                  |             |                 |             |
|------------------|-------------|-----------------|-------------|
| K2-K1-C53-C63    | -6.88(13)   | C25-K1-C63-C53  | -24.17(14)  |
| C33-K1-C53-C43   | -31.45(10)  | Co2-K1-C63-C53  | 166.43(10)  |
| C55-K1-C53-C43   | 77.07(11)   | Co1-K1-C63-C53  | -177.95(12) |
| C45-K1-C53-C43   | 53.31(11)   | K2-K1-C63-C53   | 174.58(10)  |
| C23-K1-C53-C43   | -64.71(11)  | C33-K1-C63-C13  | 62.70(10)   |
| C65-K1-C53-C43   | 84.30(11)   | C55-K1-C63-C13  | 150.77(9)   |
| C35-K1-C53-C43   | 34.86(11)   | C43-K1-C63-C13  | 96.29(11)   |
| C15-K1-C53-C43   | 64.37(12)   | C45-K1-C63-C13  | 125.42(10)  |
| C13-K1-C53-C43   | -96.89(12)  | C23-K1-C63-C13  | 29.23(9)    |
| C25-K1-C53-C43   | 37.04(12)   | C65-K1-C63-C13  | 164.94(9)   |
| C63-K1-C53-C43   | -126.21(16) | C35-K1-C63-C13  | 104.29(10)  |
| Co2-K1-C53-C43   | 96.6(3)     | C53-K1-C63-C13  | 125.91(16)  |
| Co1-K1-C53-C43   | -124.47(10) | C15-K1-C63-C13  | 143.73(10)  |
| K2-K1-C53-C43    | -133.09(9)  | C25-K1-C63-C13  | 101.74(11)  |
| C43-C53-C63-C13  | 1.3(2)      | Co2-K1-C63-C13  | -67.66(15)  |
| K1-C53-C63-C13   | -64.09(14)  | Co1-K1-C63-C13  | -52.04(9)   |
| C43-C53-C63-C103 | -178.54(15) | K2-K1-C63-C13   | -59.51(10)  |
| K1-C53-C63-C103  | 116.06(14)  | C33-K1-C63-C103 | -178.75(14) |
| C43-C53-C63-K1   | 65.40(15)   | C55-K1-C63-C103 | -90.68(12)  |
| C23-C13-C63-C53  | 0.5(2)      | C43-K1-C63-C103 | -145.16(15) |
| N21-C13-C63-C53  | 174.37(14)  | C45-K1-C63-C103 | -116.03(12) |
| K1-C13-C63-C53   | 62.29(14)   | C23-K1-C63-C103 | 147.78(14)  |
| C23-C13-C63-C103 | -179.62(15) | C65-K1-C63-C103 | -76.51(13)  |
| N21-C13-C63-C103 | -5.8(2)     | C35-K1-C63-C103 | -137.16(12) |
| K1-C13-C63-C103  | -117.86(14) | C53-K1-C63-C103 | -115.54(17) |
| C23-C13-C63-K1   | -61.76(13)  | C15-K1-C63-C103 | -97.72(14)  |
| N21-C13-C63-K1   | 112.08(13)  | C13-K1-C63-C103 | 118.55(16)  |
| C33-K1-C63-C53   | -63.21(11)  | C25-K1-C63-C103 | -139.71(12) |
| C55-K1-C63-C53   | 24.86(12)   | Co2-K1-C63-C103 | 50.89(18)   |
| C43-K1-C63-C53   | -29.62(10)  | Co1-K1-C63-C103 | 66.51(11)   |
| C45-K1-C63-C53   | -0.49(12)   | K2-K1-C63-C103  | 59.04(12)   |
| C23-K1-C63-C53   | -96.68(12)  | C33-C23-C73-C83 | -48.4(2)    |
| C65-K1-C63-C53   | 39.03(13)   | C13-C23-C73-C83 | 133.31(19)  |
| C35-K1-C63-C53   | -21.62(12)  | K1-C23-C73-C83  | -131.14(16) |
| C15-K1-C63-C53   | 17.83(16)   | C33-C23-C73-C93 | 73.4(2)     |
| C13-K1-C63-C53   | -125.91(16) | C13-C23-C73-C93 | -104.9(2)   |



|                   |             |                |             |
|-------------------|-------------|----------------|-------------|
| K1-C23-C73-C93    | -9.37(19)   | Co2-N14-C15-K1 | 12.10(12)   |
| C53-C63-C103-C113 | 55.7(2)     | C33-K1-C15-C65 | 102.90(10)  |
| C13-C63-C103-C113 | -124.14(17) | C55-K1-C15-C65 | 31.37(9)    |
| K1-C63-C103-C113  | 143.25(13)  | C43-K1-C15-C65 | 74.86(10)   |
| C53-C63-C103-C123 | -68.5(2)    | C45-K1-C15-C65 | 64.64(10)   |
| C13-C63-C103-C123 | 111.65(18)  | C23-K1-C15-C65 | 122.83(10)  |
| K1-C63-C103-C123  | 19.04(19)   | C35-K1-C15-C65 | 97.15(11)   |
| C15-N14-C24-C34   | 177.86(16)  | C53-K1-C15-C65 | 50.27(11)   |
| Co2-N14-C24-C34   | -3.8(2)     | C13-K1-C15-C65 | 101.85(17)  |
| C15-N14-C24-C14   | -3.7(3)     | C25-K1-C15-C65 | 126.60(14)  |
| Co2-N14-C24-C14   | 174.63(12)  | C63-K1-C15-C65 | 41.14(14)   |
| C74-C14-C24-N14   | -1.0(3)     | Co2-K1-C15-C65 | -124.81(11) |
| C64-C14-C24-N14   | -120.44(19) | Co1-K1-C15-C65 | -112.56(9)  |
| C84-C14-C24-N14   | 120.49(18)  | K2-K1-C15-C65  | -116.63(9)  |
| C74-C14-C24-C34   | 177.46(16)  | C33-K1-C15-C25 | -23.69(11)  |
| C64-C14-C24-C34   | 58.1(2)     | C55-K1-C15-C25 | -95.23(11)  |
| C84-C14-C24-C34   | -61.01(19)  | C43-K1-C15-C25 | -51.73(11)  |
| N14-C24-C34-C44   | 2.7(3)      | C45-K1-C15-C25 | -61.95(10)  |
| C14-C24-C34-C44   | -175.86(18) | C23-K1-C15-C25 | -3.76(13)   |
| C16-N24-C44-C34   | -176.91(16) | C65-K1-C15-C25 | -126.60(14) |
| Co2-N24-C44-C34   | 0.7(2)      | C35-K1-C15-C25 | -29.45(9)   |
| C16-N24-C44-C54   | 5.1(3)      | C53-K1-C15-C25 | -76.33(11)  |
| Co2-N24-C44-C54   | -177.23(12) | C13-K1-C15-C25 | -24.7(2)    |
| C24-C34-C44-N24   | -1.1(3)     | C63-K1-C15-C25 | -85.46(13)  |
| C24-C34-C44-C54   | 177.07(18)  | Co2-K1-C15-C25 | 108.59(10)  |
| N24-C44-C54-C104  | 1.4(3)      | Co1-K1-C15-C25 | 120.85(9)   |
| C34-C44-C54-C104  | -176.71(16) | K2-K1-C15-C25  | 116.77(9)   |
| N24-C44-C54-C94   | 121.34(19)  | C33-K1-C15-N14 | -140.91(11) |
| C34-C44-C54-C94   | -56.7(2)    | C55-K1-C15-N14 | 147.56(14)  |
| N24-C44-C54-C114  | -119.75(18) | C43-K1-C15-N14 | -168.94(11) |
| C34-C44-C54-C114  | 62.2(2)     | C45-K1-C15-N14 | -179.16(14) |
| C24-N14-C15-C65   | -85.6(2)    | C23-K1-C15-N14 | -120.98(11) |
| Co2-N14-C15-C65   | 95.84(15)   | C65-K1-C15-N14 | 116.19(16)  |
| C24-N14-C15-C25   | 101.0(2)    | C35-K1-C15-N14 | -146.66(14) |
| Co2-N14-C15-C25   | -77.58(16)  | C53-K1-C15-N14 | 166.46(10)  |
| C24-N14-C15-K1    | -169.30(13) | C13-K1-C15-N14 | -141.96(14) |

|                 |             |                 |             |
|-----------------|-------------|-----------------|-------------|
| C25-K1-C15-N14  | -117.21(16) | Co2-K1-C25-C15  | -53.61(9)   |
| C63-K1-C15-N14  | 157.33(10)  | Co1-K1-C25-C15  | -103.94(11) |
| Co2-K1-C15-N14  | -8.62(9)    | K2-K1-C25-C15   | -68.12(10)  |
| Co1-K1-C15-N14  | 3.63(16)    | C33-K1-C25-C75  | -80.96(13)  |
| K2-K1-C15-N14   | -0.44(11)   | C55-K1-C25-C75  | -178.37(15) |
| C65-C15-C25-C35 | 1.1(2)      | C43-K1-C25-C75  | -106.31(13) |
| N14-C15-C25-C35 | 174.54(15)  | C45-K1-C25-C75  | -145.16(15) |
| K1-C15-C25-C35  | 64.00(14)   | C23-K1-C25-C75  | -63.26(13)  |
| C65-C15-C25-C75 | -178.58(16) | C65-K1-C25-C75  | 148.36(15)  |
| N14-C15-C25-C75 | -5.2(2)     | C35-K1-C25-C75  | -115.61(18) |
| K1-C15-C25-C75  | -115.70(16) | C53-K1-C25-C75  | -121.00(12) |
| C65-C15-C25-K1  | -62.88(14)  | C15-K1-C25-C75  | 119.39(17)  |
| N14-C15-C25-K1  | 110.54(13)  | C13-K1-C25-C75  | -71.11(14)  |
| C33-K1-C25-C35  | 34.65(12)   | C63-K1-C25-C75  | -110.05(13) |
| C55-K1-C25-C35  | -62.76(11)  | Co2-K1-C25-C75  | 65.77(12)   |
| C43-K1-C25-C35  | 9.30(12)    | Co1-K1-C25-C75  | 15.45(17)   |
| C45-K1-C25-C35  | -29.55(11)  | K2-K1-C25-C75   | 51.27(13)   |
| C23-K1-C25-C35  | 52.35(12)   | C15-C25-C35-C45 | 0.0(3)      |
| C65-K1-C25-C35  | -96.03(12)  | C75-C25-C35-C45 | 179.72(17)  |
| C53-K1-C25-C35  | -5.39(13)   | K1-C25-C35-C45  | 65.74(16)   |
| C15-K1-C25-C35  | -125.00(16) | C15-C25-C35-K1  | -65.73(14)  |
| C13-K1-C25-C35  | 44.50(14)   | C75-C25-C35-K1  | 113.98(15)  |
| C63-K1-C25-C35  | 5.56(15)    | C33-K1-C35-C45  | 88.85(11)   |
| Co2-K1-C25-C35  | -178.62(12) | C55-K1-C35-C45  | -30.93(10)  |
| Co1-K1-C25-C35  | 131.06(10)  | C43-K1-C35-C45  | 63.40(11)   |
| K2-K1-C25-C35   | 166.88(10)  | C23-K1-C35-C45  | 99.88(11)   |
| C33-K1-C25-C15  | 159.65(10)  | C65-K1-C35-C45  | -64.06(11)  |
| C55-K1-C25-C15  | 62.24(10)   | C53-K1-C35-C45  | 49.33(11)   |
| C43-K1-C25-C15  | 134.30(10)  | C15-K1-C35-C45  | -96.15(12)  |
| C45-K1-C25-C15  | 95.45(11)   | C13-K1-C35-C45  | 85.37(11)   |
| C23-K1-C25-C15  | 177.36(9)   | C25-K1-C35-C45  | -126.00(17) |
| C65-K1-C25-C15  | 28.97(9)    | C63-K1-C35-C45  | 57.85(12)   |
| C35-K1-C25-C15  | 125.00(16)  | Co2-K1-C35-C45  | -124.83(11) |
| C53-K1-C25-C15  | 119.62(10)  | Co1-K1-C35-C45  | 129.96(11)  |
| C13-K1-C25-C15  | 169.50(9)   | K2-K1-C35-C45   | -142.52(9)  |
| C63-K1-C25-C15  | 130.56(10)  | C33-K1-C35-C25  | -145.15(12) |

|                 |             |                 |             |
|-----------------|-------------|-----------------|-------------|
| C55-K1-C35-C25  | 95.07(12)   | C25-K1-C45-C35  | 28.76(10)   |
| C43-K1-C35-C25  | -170.60(12) | C63-K1-C45-C35  | -130.12(11) |
| C45-K1-C35-C25  | 126.00(17)  | Co2-K1-C45-C35  | 54.17(11)   |
| C23-K1-C35-C25  | -134.12(11) | Co1-K1-C45-C35  | -123.57(12) |
| C65-K1-C35-C25  | 61.94(11)   | K2-K1-C45-C35   | 58.52(14)   |
| C53-K1-C35-C25  | 175.33(11)  | C35-C45-C55-C65 | 0.5(3)      |
| C15-K1-C35-C25  | 29.85(10)   | K1-C45-C55-C65  | 72.41(15)   |
| C13-K1-C35-C25  | -148.63(10) | C35-C45-C55-K1  | -71.92(15)  |
| C63-K1-C35-C25  | -176.15(10) | C33-K1-C55-C45  | -30.14(11)  |
| Co2-K1-C35-C25  | 1.17(10)    | C43-K1-C55-C45  | -47.51(10)  |
| Co1-K1-C35-C25  | -104.04(13) | C23-K1-C55-C45  | -35.69(12)  |
| K2-K1-C35-C25   | -16.52(13)  | C65-K1-C55-C45  | 124.61(16)  |
| C25-C35-C45-C55 | -0.8(3)     | C35-K1-C55-C45  | 30.34(10)   |
| K1-C35-C45-C55  | 69.08(15)   | C53-K1-C55-C45  | -71.49(11)  |
| C25-C35-C45-K1  | -69.89(16)  | C15-K1-C55-C45  | 94.05(12)   |
| C33-K1-C45-C55  | 150.00(11)  | C13-K1-C55-C45  | -66.21(12)  |
| C43-K1-C45-C55  | 127.40(11)  | C25-K1-C55-C45  | 61.98(10)   |
| C23-K1-C45-C55  | 150.71(10)  | C63-K1-C55-C45  | -81.16(11)  |
| C65-K1-C45-C55  | -30.05(9)   | Co2-K1-C55-C45  | 110.70(10)  |
| C35-K1-C45-C55  | -123.39(16) | Co1-K1-C55-C45  | -133.33(10) |
| C53-K1-C45-C55  | 106.29(11)  | K2-K1-C55-C45   | 138.78(9)   |
| C15-K1-C45-C55  | -62.54(10)  | C33-K1-C55-C65  | -154.75(10) |
| C13-K1-C45-C55  | 128.19(10)  | C43-K1-C55-C65  | -172.12(11) |
| C25-K1-C45-C55  | -94.63(12)  | C45-K1-C55-C65  | -124.61(16) |
| C63-K1-C45-C55  | 106.48(10)  | C23-K1-C55-C65  | -160.30(10) |
| Co2-K1-C45-C55  | -69.22(10)  | C35-K1-C55-C65  | -94.28(12)  |
| Co1-K1-C45-C55  | 113.03(13)  | C53-K1-C55-C65  | 163.90(11)  |
| K2-K1-C45-C55   | -64.87(13)  | C15-K1-C55-C65  | -30.56(9)   |
| C33-K1-C45-C35  | -86.61(11)  | C13-K1-C55-C65  | 169.18(9)   |
| C55-K1-C45-C35  | 123.39(16)  | C25-K1-C55-C65  | -62.63(10)  |
| C43-K1-C45-C35  | -109.20(12) | C63-K1-C55-C65  | 154.23(10)  |
| C23-K1-C45-C35  | -85.90(11)  | Co2-K1-C55-C65  | -13.91(10)  |
| C65-K1-C45-C35  | 93.34(12)   | Co1-K1-C55-C65  | 102.06(11)  |
| C53-K1-C45-C35  | -130.32(11) | K2-K1-C55-C65   | 14.17(12)   |
| C15-K1-C45-C35  | 60.85(11)   | C45-C55-C65-C15 | 0.6(2)      |
| C13-K1-C45-C35  | -108.42(11) | K1-C55-C65-C15  | 71.70(14)   |

|                  |             |                   |             |
|------------------|-------------|-------------------|-------------|
| C45-C55-C65-C105 | -177.84(16) | K2-K1-C65-C15     | 68.31(10)   |
| K1-C55-C65-C105  | -106.78(14) | C33-K1-C65-C105   | 145.88(10)  |
| C45-C55-C65-K1   | -71.06(15)  | C55-K1-C65-C105   | 115.79(16)  |
| C25-C15-C65-C55  | -1.4(2)     | C43-K1-C65-C105   | 124.02(11)  |
| N14-C15-C65-C55  | -174.80(14) | C45-K1-C65-C105   | 145.82(13)  |
| K1-C15-C65-C55   | -66.96(14)  | C23-K1-C65-C105   | 147.22(11)  |
| C25-C15-C65-C105 | 177.01(15)  | C35-K1-C65-C105   | 178.32(13)  |
| N14-C15-C65-C105 | 3.6(2)      | C53-K1-C65-C105   | 98.36(11)   |
| K1-C15-C65-C105  | 111.48(15)  | C15-K1-C65-C105   | -121.47(15) |
| C25-C15-C65-K1   | 65.53(14)   | C13-K1-C65-C105   | 96.54(14)   |
| N14-C15-C65-K1   | -107.84(13) | C25-K1-C65-C105   | -150.21(13) |
| C33-K1-C65-C55   | 30.08(12)   | C63-K1-C65-C105   | 82.59(12)   |
| C43-K1-C65-C55   | 8.23(11)    | Co2-K1-C65-C105   | -80.05(10)  |
| C45-K1-C65-C55   | 30.03(10)   | Co1-K1-C65-C105   | -11.44(15)  |
| C23-K1-C65-C55   | 31.42(15)   | K2-K1-C65-C105    | -53.16(11)  |
| C35-K1-C65-C55   | 62.52(11)   | C35-C25-C75-C85   | 64.3(2)     |
| C53-K1-C65-C55   | -17.43(12)  | C15-C25-C75-C85   | -116.05(19) |
| C15-K1-C65-C55   | 122.74(15)  | K1-C25-C75-C85    | 151.51(14)  |
| C13-K1-C65-C55   | -19.25(16)  | C35-C25-C75-C95   | -59.2(2)    |
| C25-K1-C65-C55   | 94.00(11)   | C15-C25-C75-C95   | 120.53(19)  |
| C63-K1-C65-C55   | -33.21(12)  | K1-C25-C75-C95    | 28.1(2)     |
| Co2-K1-C65-C55   | 164.15(11)  | C55-C65-C105-C125 | -52.7(2)    |
| Co1-K1-C65-C55   | -127.24(10) | C15-C65-C105-C125 | 128.84(17)  |
| K2-K1-C65-C55    | -168.96(10) | K1-C65-C105-C125  | -136.21(13) |
| C33-K1-C65-C15   | -92.65(10)  | C55-C65-C105-C115 | 70.9(2)     |
| C55-K1-C65-C15   | -122.74(15) | C15-C65-C105-C115 | -107.50(18) |
| C43-K1-C65-C15   | -114.51(10) | K1-C65-C105-C115  | -12.55(17)  |
| C45-K1-C65-C15   | -92.71(11)  | C44-N24-C16-C66   | -101.9(2)   |
| C23-K1-C65-C15   | -91.32(12)  | Co2-N24-C16-C66   | 80.12(15)   |
| C35-K1-C65-C15   | -60.21(10)  | C44-N24-C16-C26   | 84.6(2)     |
| C53-K1-C65-C15   | -140.17(9)  | Co2-N24-C16-C26   | -93.40(14)  |
| C13-K1-C65-C15   | -141.99(11) | C44-N24-C16-K2    | 161.43(13)  |
| C25-K1-C65-C15   | -28.74(9)   | Co2-N24-C16-K2    | -16.56(11)  |
| C63-K1-C65-C15   | -155.94(9)  | C36-K2-C16-C66    | 92.33(11)   |
| Co2-K1-C65-C15   | 41.42(8)    | C52-K2-C16-C66    | 53.81(11)   |
| Co1-K1-C65-C15   | 110.03(10)  | C62-K2-C16-C66    | 35.92(12)   |

|                 |             |                 |             |
|-----------------|-------------|-----------------|-------------|
| C26-K2-C16-C66  | 125.15(14)  | N24-C16-C26-C36 | 174.95(14)  |
| C46-K2-C16-C66  | 58.88(10)   | K2-C16-C26-C36  | 71.19(13)   |
| C42-K2-C16-C66  | 80.28(10)   | C66-C16-C26-C76 | -176.75(14) |
| C12-K2-C16-C66  | 62.47(18)   | N24-C16-C26-C76 | -3.2(2)     |
| C32-K2-C16-C66  | 103.08(10)  | K2-C16-C26-C76  | -106.98(14) |
| C22-K2-C16-C66  | 111.62(11)  | C66-C16-C26-K2  | -69.77(14)  |
| C56-K2-C16-C66  | 28.03(9)    | N24-C16-C26-K2  | 103.76(13)  |
| Co1-K2-C16-C66  | -102.03(10) | C52-K2-C26-C36  | -2.14(12)   |
| Co2-K2-C16-C66  | -108.43(10) | C62-K2-C26-C36  | -3.91(13)   |
| K1-K2-C16-C66   | -109.00(9)  | C46-K2-C26-C36  | -30.11(10)  |
| C36-K2-C16-C26  | -32.82(9)   | C42-K2-C26-C36  | 18.63(11)   |
| C52-K2-C16-C26  | -71.34(11)  | C12-K2-C26-C36  | 31.20(14)   |
| C62-K2-C16-C26  | -89.23(11)  | C16-K2-C26-C36  | -120.70(15) |
| C46-K2-C16-C26  | -66.28(10)  | C32-K2-C26-C36  | 41.07(11)   |
| C42-K2-C16-C26  | -44.87(11)  | C22-K2-C26-C36  | 50.73(12)   |
| C12-K2-C16-C26  | -62.69(18)  | C56-K2-C26-C36  | -61.48(11)  |
| C32-K2-C16-C26  | -22.07(11)  | Co1-K2-C26-C36  | 137.64(10)  |
| C22-K2-C16-C26  | -13.54(14)  | Co2-K2-C26-C36  | -160.86(11) |
| C56-K2-C16-C26  | -97.12(11)  | K1-K2-C26-C36   | 179.58(10)  |
| Co1-K2-C16-C26  | 132.81(9)   | C36-K2-C26-C16  | 120.70(15)  |
| Co2-K2-C16-C26  | 126.41(11)  | C52-K2-C26-C16  | 118.56(10)  |
| K1-K2-C16-C26   | 125.85(9)   | C62-K2-C26-C16  | 116.79(10)  |
| C36-K2-C16-N24  | -147.46(14) | C46-K2-C26-C16  | 90.59(11)   |
| C52-K2-C16-N24  | 174.02(10)  | C42-K2-C26-C16  | 139.32(10)  |
| C62-K2-C16-N24  | 156.13(10)  | C12-K2-C26-C16  | 151.89(9)   |
| C26-K2-C16-N24  | -114.63(16) | C32-K2-C26-C16  | 161.76(9)   |
| C46-K2-C16-N24  | 179.09(13)  | C22-K2-C26-C16  | 171.43(9)   |
| C42-K2-C16-N24  | -159.50(10) | C56-K2-C26-C16  | 59.22(9)    |
| C12-K2-C16-N24  | -177.32(12) | Co1-K2-C26-C16  | -101.67(12) |
| C32-K2-C16-N24  | -136.70(10) | Co2-K2-C26-C16  | -40.16(8)   |
| C22-K2-C16-N24  | -128.17(11) | K1-K2-C26-C16   | -59.72(10)  |
| C56-K2-C16-N24  | 148.24(14)  | C36-K2-C26-C76  | -117.55(16) |
| Co1-K2-C16-N24  | 18.18(15)   | C52-K2-C26-C76  | -119.69(10) |
| Co2-K2-C16-N24  | 11.78(8)    | C62-K2-C26-C76  | -121.46(10) |
| K1-K2-C16-N24   | 11.22(11)   | C46-K2-C26-C76  | -147.66(13) |
| C66-C16-C26-C36 | 1.4(2)      | C42-K2-C26-C76  | -98.93(10)  |

|                 |             |                 |             |
|-----------------|-------------|-----------------|-------------|
| C12-K2-C26-C76  | -86.36(12)  | K1-K2-C36-C26   | -0.57(13)   |
| C16-K2-C26-C76  | 121.75(15)  | C26-C36-C46-C56 | 0.2(3)      |
| C32-K2-C26-C76  | -76.49(11)  | K2-C36-C46-C56  | 74.43(15)   |
| C22-K2-C26-C76  | -66.82(11)  | C26-C36-C46-K2  | -74.24(15)  |
| C56-K2-C26-C76  | -179.03(12) | C36-K2-C46-C56  | -122.73(15) |
| Co1-K2-C26-C76  | 20.09(16)   | C52-K2-C46-C56  | 116.77(11)  |
| Co2-K2-C26-C76  | 81.59(10)   | C62-K2-C46-C56  | 106.97(11)  |
| K1-K2-C26-C76   | 62.03(10)   | C26-K2-C46-C56  | -91.62(11)  |
| C16-C26-C36-C46 | -1.2(2)     | C42-K2-C46-C56  | 142.98(12)  |
| C76-C26-C36-C46 | 176.99(15)  | C12-K2-C46-C56  | 122.75(10)  |
| K2-C26-C36-C46  | 77.04(15)   | C16-K2-C46-C56  | -58.47(10)  |
| C16-C26-C36-K2  | -78.25(13)  | C32-K2-C46-C56  | 156.13(11)  |
| C76-C26-C36-K2  | 99.95(13)   | C22-K2-C46-C56  | 147.73(10)  |
| C52-K2-C36-C46  | 54.32(10)   | Co1-K2-C46-C56  | 99.08(12)   |
| C62-K2-C36-C46  | 53.39(11)   | Co2-K2-C46-C56  | -49.51(10)  |
| C26-K2-C36-C46  | -123.64(16) | K1-K2-C46-C56   | -36.80(14)  |
| C42-K2-C36-C46  | 76.06(11)   | C52-K2-C46-C36  | -120.50(11) |
| C12-K2-C36-C46  | 77.30(11)   | C62-K2-C46-C36  | -130.30(10) |
| C16-K2-C36-C46  | -92.20(12)  | C26-K2-C46-C36  | 31.11(9)    |
| C32-K2-C36-C46  | 96.59(11)   | C42-K2-C46-C36  | -94.29(11)  |
| C22-K2-C36-C46  | 98.25(11)   | C12-K2-C46-C36  | -114.52(10) |
| C56-K2-C36-C46  | -29.84(9)   | C16-K2-C46-C36  | 64.26(10)   |
| Co1-K2-C36-C46  | 111.62(14)  | C32-K2-C46-C36  | -81.14(11)  |
| Co2-K2-C36-C46  | -106.77(10) | C22-K2-C46-C36  | -89.53(11)  |
| K1-K2-C36-C46   | -124.21(9)  | C56-K2-C46-C36  | 122.73(15)  |
| C52-K2-C36-C26  | 177.96(11)  | Co1-K2-C46-C36  | -138.19(10) |
| C62-K2-C36-C26  | 177.03(10)  | Co2-K2-C46-C36  | 73.22(10)   |
| C46-K2-C36-C26  | 123.64(16)  | K1-K2-C46-C36   | 85.93(12)   |
| C42-K2-C36-C26  | -160.30(12) | C36-C46-C56-C66 | 0.6(3)      |
| C12-K2-C36-C26  | -159.06(10) | K2-C46-C56-C66  | 66.12(16)   |
| C16-K2-C36-C26  | 31.44(9)    | C36-C46-C56-K2  | -65.49(14)  |
| C32-K2-C36-C26  | -139.77(11) | C36-K2-C56-C46  | 31.87(10)   |
| C22-K2-C36-C26  | -138.11(10) | C52-K2-C56-C46  | -57.79(11)  |
| C56-K2-C36-C26  | 93.81(12)   | C62-K2-C56-C46  | -75.44(11)  |
| Co1-K2-C36-C26  | -124.74(12) | C26-K2-C56-C46  | 66.49(11)   |
| Co2-K2-C36-C26  | 16.87(10)   | C42-K2-C56-C46  | -33.70(11)  |

|                  |             |                   |             |
|------------------|-------------|-------------------|-------------|
| C12-K2-C56-C46   | -68.27(11)  | C56-C66-C106-C126 | -56.2(2)    |
| C16-K2-C56-C46   | 99.43(12)   | C16-C66-C106-C126 | 123.48(19)  |
| C32-K2-C56-C46   | -25.07(11)  | C56-C66-C106-C116 | 67.2(2)     |
| C22-K2-C56-C46   | -39.50(12)  | C16-C66-C106-C116 | -113.07(19) |
| Co1-K2-C56-C46   | -126.92(10) | C17-C27-C37-C47   | -174.4(2)   |
| Co2-K2-C56-C46   | 129.26(10)  | C27-C37-C47-C57   | 175.6(2)    |
| K1-K2-C56-C46    | 155.49(9)   | C38#1-C18-C28-C38 | -0.4(4)     |
| C36-K2-C56-C66   | -96.26(12)  | C18-C28-C38-C18#1 | 0.4(4)      |
| C52-K2-C56-C66   | 174.08(11)  |                   |             |
| C62-K2-C56-C66   | 156.43(11)  |                   |             |
| C26-K2-C56-C66   | -61.64(10)  |                   |             |
| C46-K2-C56-C66   | -128.14(16) |                   |             |
| C42-K2-C56-C66   | -161.83(11) |                   |             |
| C12-K2-C56-C66   | 163.60(10)  |                   |             |
| C16-K2-C56-C66   | -28.71(9)   |                   |             |
| C32-K2-C56-C66   | -153.21(10) |                   |             |
| C22-K2-C56-C66   | -167.64(10) |                   |             |
| Co1-K2-C56-C66   | 104.95(11)  |                   |             |
| Co2-K2-C56-C66   | 1.13(10)    |                   |             |
| K1-K2-C56-C66    | 27.36(12)   |                   |             |
| C46-C56-C66-C16  | -0.4(2)     |                   |             |
| K2-C56-C66-C16   | 59.97(14)   |                   |             |
| C46-C56-C66-C106 | 179.33(16)  |                   |             |
| K2-C56-C66-C106  | -120.32(15) |                   |             |
| C26-C16-C66-C56  | -0.7(2)     |                   |             |
| N24-C16-C66-C56  | -174.18(14) |                   |             |
| K2-C16-C66-C56   | -61.77(14)  |                   |             |
| C26-C16-C66-C106 | 179.64(15)  |                   |             |
| N24-C16-C66-C106 | 6.1(2)      |                   |             |
| K2-C16-C66-C106  | 118.53(15)  |                   |             |
| C36-C26-C76-C96  | -79.70(19)  |                   |             |
| C16-C26-C76-C96  | 98.45(18)   |                   |             |
| K2-C26-C76-C96   | 1.86(16)    |                   |             |
| C36-C26-C76-C86  | 43.3(2)     |                   |             |
| C16-C26-C76-C86  | -138.52(16) |                   |             |
| K2-C26-C76-C86   | 124.90(13)  |                   |             |

REFERENCE NUMBER: holkd21

CRYSTAL STRUCTURE REPORT

$C_{41} H_{64} Co N_2$

or

LCo(cyclohexyl)

Report prepared for:

K. Ding, Prof. P. Holland

December 19, 2008

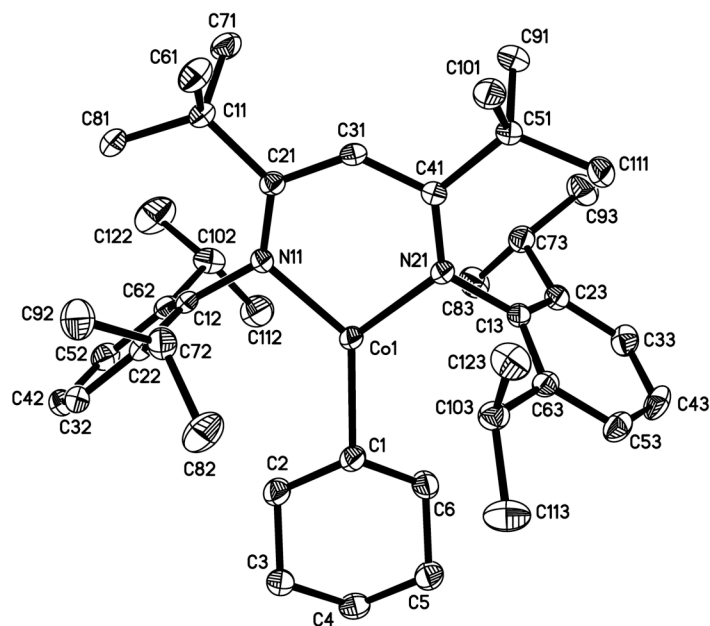

William W. Brennessel

X-ray Crystallographic Facility

Department of Chemistry, University of Rochester

120 Trustee Road

Rochester, NY 14627



### Data collection

A crystal (0.22 x 0.16 x 0.08 mm<sup>3</sup>) was placed onto the tip of a 0.1 mm diameter glass capillary tube or fiber and mounted on a Bruker SMART APEX II CCD Platform diffractometer for a data collection at 100.0(1) K.<sup>1</sup> A preliminary set of cell constants and an orientation matrix were calculated from reflections harvested from three orthogonal wedges of reciprocal space. The full data collection was carried out using MoK $\alpha$  radiation (graphite monochromator) with a frame time of 60 seconds and a detector distance of 3.97 cm. A randomly oriented region of reciprocal space was surveyed: four major sections of frames were collected with 0.50° steps in  $\omega$  at four different  $\phi$  settings and a detector position of -38° in  $2\theta$ . The intensity data were corrected for absorption.<sup>2</sup> Final cell constants were calculated from the xyz centroids of 3882 strong reflections from the actual data collection after integration.<sup>3</sup> See Table 1 for additional crystal and refinement information.

### Structure solution and refinement

The structure was solved using SIR97<sup>4</sup> and refined using SHELXL-97.<sup>5</sup> The space group  $P2_1/n$  was determined based on systematic absences and intensity statistics. A direct-methods solution was calculated which provided most non-hydrogen atoms from the E-map. Full-matrix least squares / difference Fourier cycles were performed which located the remaining non-hydrogen atoms. All non-hydrogen atoms were refined with anisotropic displacement parameters. All hydrogen atoms were placed in ideal positions and refined as riding atoms with relative isotropic displacement parameters. The final full matrix least squares refinement converged to  $R1 = 0.0537$  ( $F^2, I > 2\sigma(I)$ ) and  $wR2 = 0.1310$  ( $F^2$ , all data).

### Structure description

The structure is the one suggested with all atoms in general positions.

Unless noted otherwise all structural diagrams containing thermal displacement ellipsoids are drawn at the 50 % probability level.

Data collection, structure solution, and structure refinement were conducted at the X-ray Crystallographic Facility, B51 Hutchison Hall, Department of Chemistry, University of Rochester. All publications arising from this report MUST either 1) include William W. Brennessel as a coauthor or 2) acknowledge William W. Brennessel and the X-ray Crystallographic Facility of the Department of Chemistry at the University of Rochester.

- 
- <sup>1</sup> *APEX2*, version 2008.3-0; Bruker AXS: Madison, WI, 2008.
- <sup>2</sup> Sheldrick, G. M. *SADABS*, version 2008/1; University of Göttingen: Göttingen, Germany, 2008.
- <sup>3</sup> *SAINTE*, version 7.53A; Bruker AXS: Madison, WI, 2007.
- <sup>4</sup> Altomare, A.; Burla, M. C.; Camalli, M.; Casciarano, G. L.; Giacovazzo, C.; Guagliardi, A.; Moliterni, A. G. G.; Polidori, G.; Spagna, R. *SIR97: A new program for solving and refining crystal structures*; Istituto di Cristallografia, CNR: Bari, Italy, 1999.
- <sup>5</sup> Sheldrick, G. M. *Acta. Cryst.* **2008**, *A64*, 112-122.

Some equations of interest:

$$R_{\text{int}} = \Sigma |F_o^2 - \langle F_o^2 \rangle| / \Sigma |F_o^2|$$

$$R1 = \Sigma ||F_o| - |F_c|| / \Sigma |F_o|$$

$$wR2 = [\Sigma [w(F_o^2 - F_c^2)^2] / \Sigma [w(F_o^2)^2]]^{1/2}$$

where  $w = 1 / [\sigma^2 (F_o^2) + (aP)^2 + bP]$  and

$$P = 1/3 \max (0, F_o^2) + 2/3 F_c^2$$

$$\text{GOF} = S = [\Sigma [w(F_o^2 - F_c^2)^2] / (m-n)]^{1/2}$$

where  $m$  = number of reflections and  $n$  = number of parameters

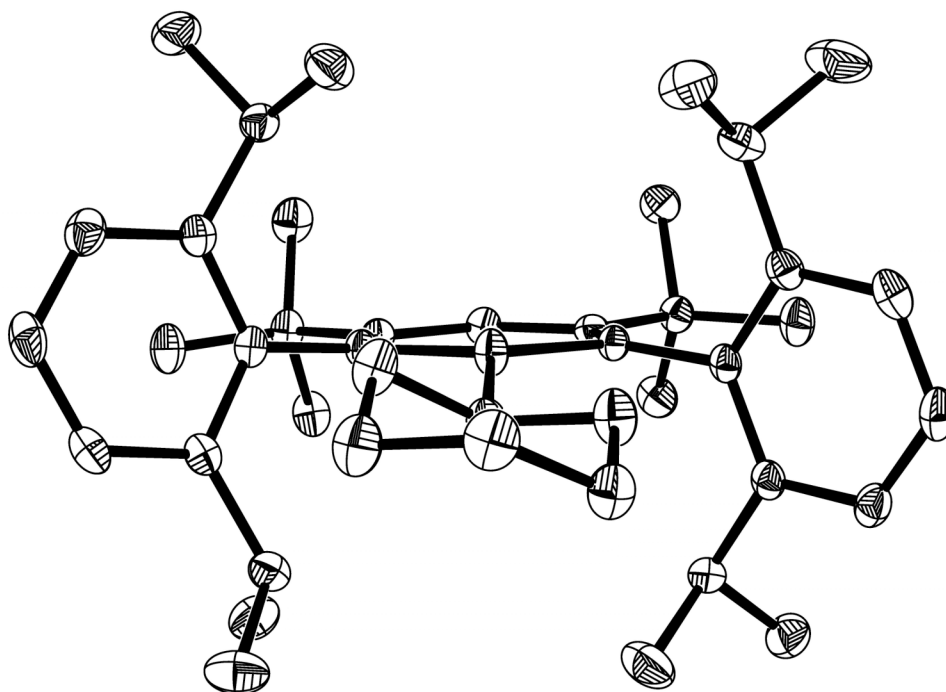

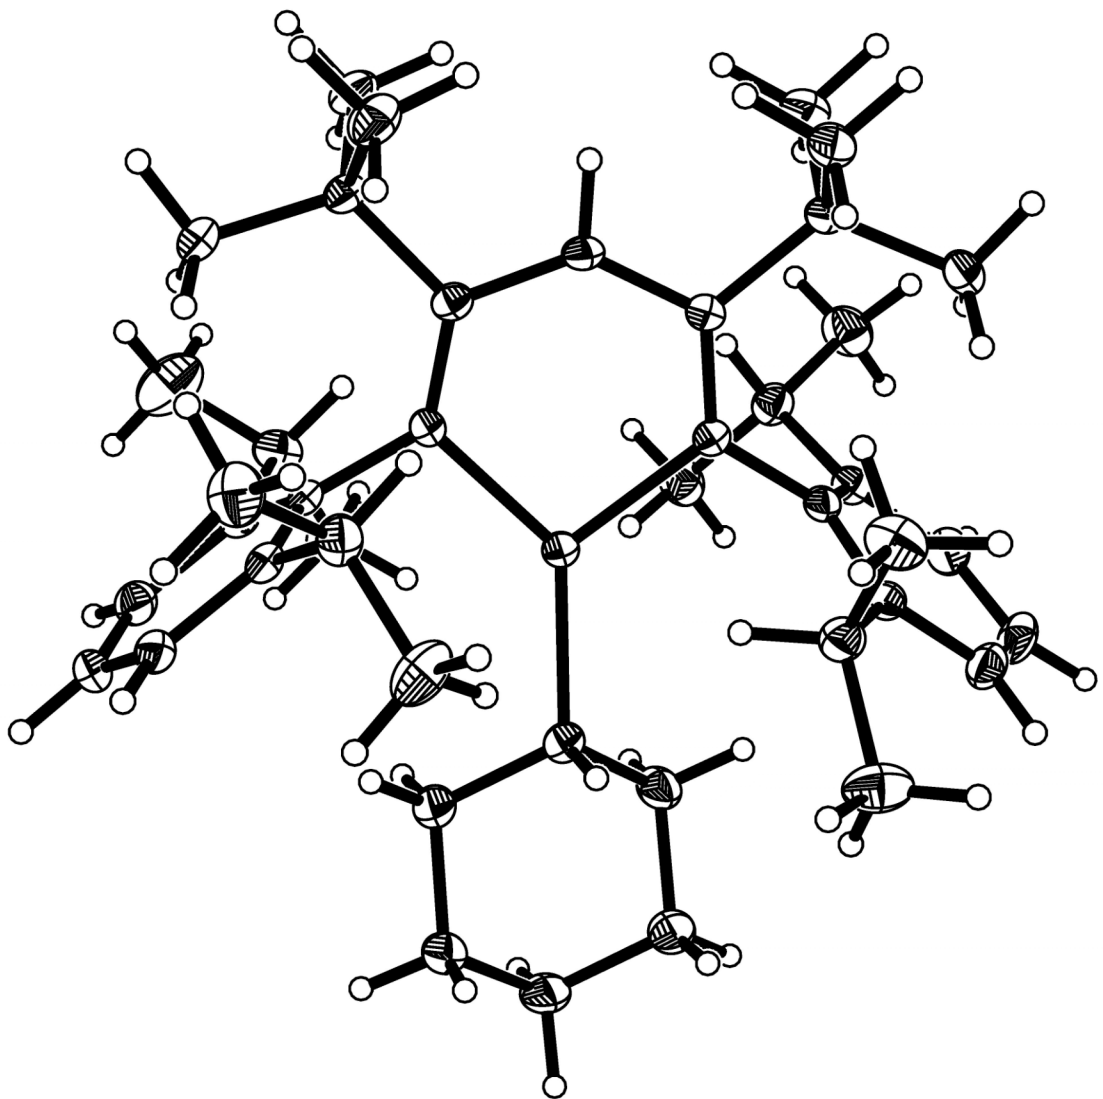

Table 1. Crystal data and structure refinement for holkd21.

|                                                     |                                                               |                           |
|-----------------------------------------------------|---------------------------------------------------------------|---------------------------|
| Identification code                                 | holkd21                                                       |                           |
| Empirical formula                                   | C <sub>41</sub> H <sub>64</sub> Co N <sub>2</sub>             |                           |
| Formula weight                                      | 643.87                                                        |                           |
| Temperature                                         | 100.0(1) K                                                    |                           |
| Wavelength                                          | 0.71073 Å                                                     |                           |
| Crystal system                                      | Monoclinic                                                    |                           |
| Space group                                         | <i>P</i> 2 <sub>1</sub> / <i>n</i>                            |                           |
| Unit cell dimensions                                | <i>a</i> = 9.6029(6) Å                                        | $\alpha = 90^\circ$       |
|                                                     | <i>b</i> = 17.8932(12) Å                                      | $\beta = 95.060(1)^\circ$ |
|                                                     | <i>c</i> = 21.6988(14) Å                                      | $\gamma = 90^\circ$       |
| Volume                                              | 3713.9(4) Å <sup>3</sup>                                      |                           |
| <i>Z</i>                                            | 4                                                             |                           |
| Density (calculated)                                | 1.152 Mg/m <sup>3</sup>                                       |                           |
| Absorption coefficient                              | 0.491 mm <sup>-1</sup>                                        |                           |
| <i>F</i> (000)                                      | 1404                                                          |                           |
| Crystal color, morphology                           | red-orange, block                                             |                           |
| Crystal size                                        | 0.22 x 0.16 x 0.08 mm <sup>3</sup>                            |                           |
| Theta range for data collection                     | 1.48 to 31.77°                                                |                           |
| Index ranges                                        | -14 ≤ <i>h</i> ≤ 14, -26 ≤ <i>k</i> ≤ 26, -32 ≤ <i>l</i> ≤ 32 |                           |
| Reflections collected                               | 66478                                                         |                           |
| Independent reflections                             | 12621 [ <i>R</i> (int) = 0.0988]                              |                           |
| Observed reflections                                | 8075                                                          |                           |
| Completeness to theta = 31.77°                      | 99.9%                                                         |                           |
| Absorption correction                               | Multi-scan                                                    |                           |
| Max. and min. transmission                          | 0.9618 and 0.8996                                             |                           |
| Refinement method                                   | Full-matrix least-squares on <i>F</i> <sup>2</sup>            |                           |
| Data / restraints / parameters                      | 12621 / 0 / 411                                               |                           |
| Goodness-of-fit on <i>F</i> <sup>2</sup>            | 1.012                                                         |                           |
| Final <i>R</i> indices [ <i>I</i> > 2σ( <i>I</i> )] | <i>R</i> 1 = 0.0537, <i>wR</i> 2 = 0.1115                     |                           |
| <i>R</i> indices (all data)                         | <i>R</i> 1 = 0.1000, <i>wR</i> 2 = 0.1310                     |                           |
| Largest diff. peak and hole                         | 0.455 and -0.515 e.Å <sup>-3</sup>                            |                           |

Table 2. Atomic coordinates ( $\times 10^4$ ) and equivalent isotropic displacement parameters ( $\text{\AA}^2 \times 10^3$ ) for holkd21.  $U_{\text{eq}}$  is defined as one third of the trace of the orthogonalized  $U_{ij}$  tensor.

|      | x        | y       | z       | $U_{\text{eq}}$ |
|------|----------|---------|---------|-----------------|
| Co1  | 6026(1)  | 2434(1) | 3653(1) | 19(1)           |
| N11  | 7225(2)  | 2368(1) | 4419(1) | 15(1)           |
| N21  | 5954(2)  | 1369(1) | 3460(1) | 16(1)           |
| C1   | 4617(2)  | 3199(1) | 3330(1) | 21(1)           |
| C2   | 4896(2)  | 4000(1) | 3552(1) | 25(1)           |
| C3   | 3706(2)  | 4530(1) | 3331(1) | 25(1)           |
| C4   | 3364(2)  | 4496(1) | 2635(1) | 27(1)           |
| C5   | 3082(2)  | 3699(1) | 2420(1) | 27(1)           |
| C6   | 4318(2)  | 3189(1) | 2626(1) | 25(1)           |
| C11  | 8860(2)  | 1665(1) | 5219(1) | 19(1)           |
| C21  | 7811(2)  | 1734(1) | 4638(1) | 16(1)           |
| C31  | 7530(2)  | 1052(1) | 4330(1) | 18(1)           |
| C41  | 6672(2)  | 853(1)  | 3797(1) | 16(1)           |
| C51  | 6681(2)  | -5(1)   | 3655(1) | 20(1)           |
| C61  | 8318(2)  | 1084(1) | 5663(1) | 27(1)           |
| C71  | 10264(2) | 1398(1) | 5008(1) | 25(1)           |
| C81  | 9175(2)  | 2376(1) | 5597(1) | 26(1)           |
| C91  | 8174(2)  | -232(1) | 3521(1) | 28(1)           |
| C101 | 6281(2)  | -436(1) | 4231(1) | 25(1)           |
| C111 | 5691(2)  | -288(1) | 3110(1) | 26(1)           |
| C12  | 7251(2)  | 3090(1) | 4706(1) | 16(1)           |
| C22  | 6240(2)  | 3260(1) | 5117(1) | 18(1)           |
| C32  | 6120(2)  | 3996(1) | 5307(1) | 22(1)           |
| C42  | 6970(2)  | 4552(1) | 5103(1) | 24(1)           |
| C52  | 7973(2)  | 4373(1) | 4711(1) | 24(1)           |
| C62  | 8134(2)  | 3644(1) | 4502(1) | 19(1)           |
| C72  | 5289(2)  | 2665(1) | 5347(1) | 22(1)           |
| C82  | 3787(2)  | 2784(2) | 5072(1) | 36(1)           |
| C92  | 5344(2)  | 2643(1) | 6055(1) | 30(1)           |
| C102 | 9259(2)  | 3461(1) | 4081(1) | 24(1)           |
| C112 | 8926(3)  | 3787(1) | 3430(1) | 35(1)           |

|      |          |         |         |       |
|------|----------|---------|---------|-------|
| C122 | 10697(2) | 3728(2) | 4340(1) | 44(1) |
| C13  | 5176(2)  | 1265(1) | 2873(1) | 17(1) |
| C23  | 5901(2)  | 1255(1) | 2336(1) | 19(1) |
| C33  | 5127(2)  | 1192(1) | 1767(1) | 24(1) |
| C43  | 3683(2)  | 1164(1) | 1723(1) | 26(1) |
| C53  | 2991(2)  | 1227(1) | 2253(1) | 23(1) |
| C63  | 3706(2)  | 1287(1) | 2837(1) | 18(1) |
| C73  | 7470(2)  | 1360(1) | 2370(1) | 22(1) |
| C83  | 7808(2)  | 2178(1) | 2253(1) | 30(1) |
| C93  | 8180(2)  | 852(1)  | 1926(1) | 31(1) |
| C103 | 2927(2)  | 1406(1) | 3409(1) | 22(1) |
| C113 | 1491(2)  | 1765(1) | 3261(1) | 35(1) |
| C123 | 2781(2)  | 700(1)  | 3789(1) | 29(1) |

---

Table 3. Bond lengths [Å] and angles [°] for holkd21.

|              |            |               |          |
|--------------|------------|---------------|----------|
| Co(1)-N(11)  | 1.9412(15) | C(51)-C(101)  | 1.545(3) |
| Co(1)-N(21)  | 1.9501(15) | C(61)-H(61A)  | 0.9800   |
| Co(1)-C(1)   | 2.0077(19) | C(61)-H(61B)  | 0.9800   |
| N(11)-C(21)  | 1.334(2)   | C(61)-H(61C)  | 0.9800   |
| N(11)-C(12)  | 1.433(2)   | C(71)-H(71A)  | 0.9800   |
| N(21)-C(41)  | 1.331(2)   | C(71)-H(71B)  | 0.9800   |
| N(21)-C(13)  | 1.432(2)   | C(71)-H(71C)  | 0.9800   |
| C(1)-C(2)    | 1.528(3)   | C(81)-H(81A)  | 0.9800   |
| C(1)-C(6)    | 1.528(3)   | C(81)-H(81B)  | 0.9800   |
| C(1)-H(1)    | 1.0000     | C(81)-H(81C)  | 0.9800   |
| C(2)-C(3)    | 1.529(3)   | C(91)-H(91A)  | 0.9800   |
| C(2)-H(2A)   | 0.9900     | C(91)-H(91B)  | 0.9800   |
| C(2)-H(2B)   | 0.9900     | C(91)-H(91C)  | 0.9800   |
| C(3)-C(4)    | 1.518(3)   | C(101)-H(10A) | 0.9800   |
| C(3)-H(3A)   | 0.9900     | C(101)-H(10B) | 0.9800   |
| C(3)-H(3B)   | 0.9900     | C(101)-H(10C) | 0.9800   |
| C(4)-C(5)    | 1.519(3)   | C(111)-H(11A) | 0.9800   |
| C(4)-H(4A)   | 0.9900     | C(111)-H(11B) | 0.9800   |
| C(4)-H(4B)   | 0.9900     | C(111)-H(11C) | 0.9800   |
| C(5)-C(6)    | 1.532(3)   | C(12)-C(62)   | 1.401(3) |
| C(5)-H(5A)   | 0.9900     | C(12)-C(22)   | 1.409(3) |
| C(5)-H(5B)   | 0.9900     | C(22)-C(32)   | 1.388(3) |
| C(6)-H(6A)   | 0.9900     | C(22)-C(72)   | 1.516(3) |
| C(6)-H(6B)   | 0.9900     | C(32)-C(42)   | 1.383(3) |
| C(11)-C(81)  | 1.529(3)   | C(32)-H(32)   | 0.9500   |
| C(11)-C(71)  | 1.537(3)   | C(42)-C(52)   | 1.378(3) |
| C(11)-C(61)  | 1.539(3)   | C(42)-H(42)   | 0.9500   |
| C(11)-C(21)  | 1.548(2)   | C(52)-C(62)   | 1.394(3) |
| C(21)-C(31)  | 1.407(2)   | C(52)-H(52)   | 0.9500   |
| C(31)-C(41)  | 1.405(2)   | C(62)-C(102)  | 1.513(3) |
| C(31)-H(31)  | 0.9500     | C(72)-C(82)   | 1.527(3) |
| C(41)-C(51)  | 1.565(2)   | C(72)-C(92)   | 1.532(3) |
| C(51)-C(111) | 1.536(3)   | C(72)-H(72)   | 1.0000   |
| C(51)-C(91)  | 1.542(3)   | C(82)-H(82A)  | 0.9800   |

|               |          |                   |            |
|---------------|----------|-------------------|------------|
| C(82)-H(82B)  | 0.9800   | C(103)-H(10E)     | 1.0000     |
| C(82)-H(82C)  | 0.9800   | C(113)-H(11G)     | 0.9800     |
| C(92)-H(92A)  | 0.9800   | C(113)-H(11H)     | 0.9800     |
| C(92)-H(92B)  | 0.9800   | C(113)-H(11I)     | 0.9800     |
| C(92)-H(92C)  | 0.9800   | C(123)-H(12D)     | 0.9800     |
| C(102)-C(122) | 1.522(3) | C(123)-H(12E)     | 0.9800     |
| C(102)-C(112) | 1.535(3) | C(123)-H(12F)     | 0.9800     |
| C(102)-H(10D) | 1.0000   | N(11)-Co(1)-N(21) | 97.54(6)   |
| C(112)-H(11D) | 0.9800   | N(11)-Co(1)-C(1)  | 132.16(7)  |
| C(112)-H(11E) | 0.9800   | N(21)-Co(1)-C(1)  | 125.56(7)  |
| C(112)-H(11F) | 0.9800   | C(21)-N(11)-C(12) | 128.46(15) |
| C(122)-H(12A) | 0.9800   | C(21)-N(11)-Co(1) | 123.75(12) |
| C(122)-H(12B) | 0.9800   | C(12)-N(11)-Co(1) | 107.63(11) |
| C(122)-H(12C) | 0.9800   | C(41)-N(21)-C(13) | 127.01(15) |
| C(13)-C(63)   | 1.407(3) | C(41)-N(21)-Co(1) | 123.64(12) |
| C(13)-C(23)   | 1.409(3) | C(13)-N(21)-Co(1) | 108.87(11) |
| C(23)-C(33)   | 1.388(3) | C(2)-C(1)-C(6)    | 109.74(16) |
| C(23)-C(73)   | 1.513(3) | C(2)-C(1)-Co(1)   | 115.84(13) |
| C(33)-C(43)   | 1.383(3) | C(6)-C(1)-Co(1)   | 113.74(13) |
| C(33)-H(33)   | 0.9500   | C(2)-C(1)-H(1)    | 105.5      |
| C(43)-C(53)   | 1.384(3) | C(6)-C(1)-H(1)    | 105.5      |
| C(43)-H(43)   | 0.9500   | Co(1)-C(1)-H(1)   | 105.5      |
| C(53)-C(63)   | 1.391(3) | C(1)-C(2)-C(3)    | 112.21(16) |
| C(53)-H(53)   | 0.9500   | C(1)-C(2)-H(2A)   | 109.2      |
| C(63)-C(103)  | 1.519(3) | C(3)-C(2)-H(2A)   | 109.2      |
| C(73)-C(83)   | 1.526(3) | C(1)-C(2)-H(2B)   | 109.2      |
| C(73)-C(93)   | 1.527(3) | C(3)-C(2)-H(2B)   | 109.2      |
| C(73)-H(73)   | 1.0000   | H(2A)-C(2)-H(2B)  | 107.9      |
| C(83)-H(83B)  | 0.9800   | C(4)-C(3)-C(2)    | 112.15(17) |
| C(83)-H(83C)  | 0.9800   | C(4)-C(3)-H(3A)   | 109.2      |
| C(83)-H(83D)  | 0.9800   | C(2)-C(3)-H(3A)   | 109.2      |
| C(93)-H(93A)  | 0.9800   | C(4)-C(3)-H(3B)   | 109.2      |
| C(93)-H(93B)  | 0.9800   | C(2)-C(3)-H(3B)   | 109.2      |
| C(93)-H(93C)  | 0.9800   | H(3A)-C(3)-H(3B)  | 107.9      |
| C(103)-C(123) | 1.523(3) | C(3)-C(4)-C(5)    | 111.14(16) |
| C(103)-C(113) | 1.529(3) | C(3)-C(4)-H(4A)   | 109.4      |



|                     |            |                      |            |
|---------------------|------------|----------------------|------------|
| C(5)-C(4)-H(4A)     | 109.4      | C(101)-C(51)-C(41)   | 108.93(15) |
| C(3)-C(4)-H(4B)     | 109.4      | C(11)-C(61)-H(61A)   | 109.5      |
| C(5)-C(4)-H(4B)     | 109.4      | C(11)-C(61)-H(61B)   | 109.5      |
| H(4A)-C(4)-H(4B)    | 108.0      | H(61A)-C(61)-H(61B)  | 109.5      |
| C(4)-C(5)-C(6)      | 110.91(17) | C(11)-C(61)-H(61C)   | 109.5      |
| C(4)-C(5)-H(5A)     | 109.5      | H(61A)-C(61)-H(61C)  | 109.5      |
| C(6)-C(5)-H(5A)     | 109.5      | H(61B)-C(61)-H(61C)  | 109.5      |
| C(4)-C(5)-H(5B)     | 109.5      | C(11)-C(71)-H(71A)   | 109.5      |
| C(6)-C(5)-H(5B)     | 109.5      | C(11)-C(71)-H(71B)   | 109.5      |
| H(5A)-C(5)-H(5B)    | 108.0      | H(71A)-C(71)-H(71B)  | 109.5      |
| C(1)-C(6)-C(5)      | 110.99(16) | C(11)-C(71)-H(71C)   | 109.5      |
| C(1)-C(6)-H(6A)     | 109.4      | H(71A)-C(71)-H(71C)  | 109.5      |
| C(5)-C(6)-H(6A)     | 109.4      | H(71B)-C(71)-H(71C)  | 109.5      |
| C(1)-C(6)-H(6B)     | 109.4      | C(11)-C(81)-H(81A)   | 109.5      |
| C(5)-C(6)-H(6B)     | 109.4      | C(11)-C(81)-H(81B)   | 109.5      |
| H(6A)-C(6)-H(6B)    | 108.0      | H(81A)-C(81)-H(81B)  | 109.5      |
| C(81)-C(11)-C(71)   | 106.36(16) | C(11)-C(81)-H(81C)   | 109.5      |
| C(81)-C(11)-C(61)   | 106.73(16) | H(81A)-C(81)-H(81C)  | 109.5      |
| C(71)-C(11)-C(61)   | 109.29(16) | H(81B)-C(81)-H(81C)  | 109.5      |
| C(81)-C(11)-C(21)   | 117.04(15) | C(51)-C(91)-H(91A)   | 109.5      |
| C(71)-C(11)-C(21)   | 107.87(15) | C(51)-C(91)-H(91B)   | 109.5      |
| C(61)-C(11)-C(21)   | 109.36(15) | H(91A)-C(91)-H(91B)  | 109.5      |
| N(11)-C(21)-C(31)   | 120.79(16) | C(51)-C(91)-H(91C)   | 109.5      |
| N(11)-C(21)-C(11)   | 125.49(16) | H(91A)-C(91)-H(91C)  | 109.5      |
| C(31)-C(21)-C(11)   | 113.70(15) | H(91B)-C(91)-H(91C)  | 109.5      |
| C(41)-C(31)-C(21)   | 133.22(16) | C(51)-C(101)-H(10A)  | 109.5      |
| C(41)-C(31)-H(31)   | 113.4      | C(51)-C(101)-H(10B)  | 109.5      |
| C(21)-C(31)-H(31)   | 113.4      | H(10A)-C(101)-H(10B) | 109.5      |
| N(21)-C(41)-C(31)   | 120.85(16) | C(51)-C(101)-H(10C)  | 109.5      |
| N(21)-C(41)-C(51)   | 125.78(16) | H(10A)-C(101)-H(10C) | 109.5      |
| C(31)-C(41)-C(51)   | 113.36(15) | H(10B)-C(101)-H(10C) | 109.5      |
| C(111)-C(51)-C(91)  | 106.88(16) | C(51)-C(111)-H(11A)  | 109.5      |
| C(111)-C(51)-C(101) | 106.04(16) | C(51)-C(111)-H(11B)  | 109.5      |
| C(91)-C(51)-C(101)  | 108.80(16) | H(11A)-C(111)-H(11B) | 109.5      |
| C(111)-C(51)-C(41)  | 117.45(15) | C(51)-C(111)-H(11C)  | 109.5      |
| C(91)-C(51)-C(41)   | 108.47(16) | H(11A)-C(111)-H(11C) | 109.5      |

|                      |            |                      |            |
|----------------------|------------|----------------------|------------|
| H(11B)-C(111)-H(11C) | 109.5      | H(92B)-C(92)-H(92C)  | 109.5      |
| C(62)-C(12)-C(22)    | 121.10(17) | C(62)-C(102)-C(122)  | 112.38(18) |
| C(62)-C(12)-N(11)    | 119.28(16) | C(62)-C(102)-C(112)  | 111.83(17) |
| C(22)-C(12)-N(11)    | 118.91(16) | C(122)-C(102)-C(112) | 109.24(18) |
| C(32)-C(22)-C(12)    | 118.19(17) | C(62)-C(102)-H(10D)  | 107.7      |
| C(32)-C(22)-C(72)    | 120.12(17) | C(122)-C(102)-H(10D) | 107.7      |
| C(12)-C(22)-C(72)    | 121.68(16) | C(112)-C(102)-H(10D) | 107.7      |
| C(42)-C(32)-C(22)    | 121.40(18) | C(102)-C(112)-H(11D) | 109.5      |
| C(42)-C(32)-H(32)    | 119.3      | C(102)-C(112)-H(11E) | 109.5      |
| C(22)-C(32)-H(32)    | 119.3      | H(11D)-C(112)-H(11E) | 109.5      |
| C(52)-C(42)-C(32)    | 119.65(18) | C(102)-C(112)-H(11F) | 109.5      |
| C(52)-C(42)-H(42)    | 120.2      | H(11D)-C(112)-H(11F) | 109.5      |
| C(32)-C(42)-H(42)    | 120.2      | H(11E)-C(112)-H(11F) | 109.5      |
| C(42)-C(52)-C(62)    | 121.43(18) | C(102)-C(122)-H(12A) | 109.5      |
| C(42)-C(52)-H(52)    | 119.3      | C(102)-C(122)-H(12B) | 109.5      |
| C(62)-C(52)-H(52)    | 119.3      | H(12A)-C(122)-H(12B) | 109.5      |
| C(52)-C(62)-C(12)    | 118.20(18) | C(102)-C(122)-H(12C) | 109.5      |
| C(52)-C(62)-C(102)   | 120.36(17) | H(12A)-C(122)-H(12C) | 109.5      |
| C(12)-C(62)-C(102)   | 121.42(17) | H(12B)-C(122)-H(12C) | 109.5      |
| C(22)-C(72)-C(82)    | 110.39(17) | C(63)-C(13)-C(23)    | 121.43(16) |
| C(22)-C(72)-C(92)    | 112.28(16) | C(63)-C(13)-N(21)    | 119.17(16) |
| C(82)-C(72)-C(92)    | 110.12(18) | C(23)-C(13)-N(21)    | 118.71(17) |
| C(22)-C(72)-H(72)    | 108.0      | C(33)-C(23)-C(13)    | 118.11(18) |
| C(82)-C(72)-H(72)    | 108.0      | C(33)-C(23)-C(73)    | 120.37(18) |
| C(92)-C(72)-H(72)    | 108.0      | C(13)-C(23)-C(73)    | 121.41(16) |
| C(72)-C(82)-H(82A)   | 109.5      | C(43)-C(33)-C(23)    | 121.32(19) |
| C(72)-C(82)-H(82B)   | 109.5      | C(43)-C(33)-H(33)    | 119.3      |
| H(82A)-C(82)-H(82B)  | 109.5      | C(23)-C(33)-H(33)    | 119.3      |
| C(72)-C(82)-H(82C)   | 109.5      | C(33)-C(43)-C(53)    | 119.45(18) |
| H(82A)-C(82)-H(82C)  | 109.5      | C(33)-C(43)-H(43)    | 120.3      |
| H(82B)-C(82)-H(82C)  | 109.5      | C(53)-C(43)-H(43)    | 120.3      |
| C(72)-C(92)-H(92A)   | 109.5      | C(43)-C(53)-C(63)    | 121.93(19) |
| C(72)-C(92)-H(92B)   | 109.5      | C(43)-C(53)-H(53)    | 119.0      |
| H(92A)-C(92)-H(92B)  | 109.5      | C(63)-C(53)-H(53)    | 119.0      |
| C(72)-C(92)-H(92C)   | 109.5      | C(53)-C(63)-C(13)    | 117.40(17) |
| H(92A)-C(92)-H(92C)  | 109.5      | C(53)-C(63)-C(103)   | 121.00(17) |

|                      |            |                      |      |
|----------------------|------------|----------------------|------|
| C(13)-C(63)-C(103)   | 121.54(16) | H(12E)-C(123)-H(12F) | 109. |
| C(23)-C(73)-C(83)    | 109.64(16) |                      |      |
| C(23)-C(73)-C(93)    | 113.22(16) |                      |      |
| C(83)-C(73)-C(93)    | 110.64(17) |                      |      |
| C(23)-C(73)-H(73)    | 107.7      |                      |      |
| C(83)-C(73)-H(73)    | 107.7      |                      |      |
| C(93)-C(73)-H(73)    | 107.7      |                      |      |
| C(73)-C(83)-H(83B)   | 109.5      |                      |      |
| C(73)-C(83)-H(83C)   | 109.5      |                      |      |
| H(83B)-C(83)-H(83C)  | 109.5      |                      |      |
| C(73)-C(83)-H(83D)   | 109.5      |                      |      |
| H(83B)-C(83)-H(83D)  | 109.5      |                      |      |
| H(83C)-C(83)-H(83D)  | 109.5      |                      |      |
| C(73)-C(93)-H(93A)   | 109.5      |                      |      |
| C(73)-C(93)-H(93B)   | 109.5      |                      |      |
| H(93A)-C(93)-H(93B)  | 109.5      |                      |      |
| C(73)-C(93)-H(93C)   | 109.5      |                      |      |
| H(93A)-C(93)-H(93C)  | 109.5      |                      |      |
| H(93B)-C(93)-H(93C)  | 109.5      |                      |      |
| C(63)-C(103)-C(123)  | 113.62(16) |                      |      |
| C(63)-C(103)-C(113)  | 112.81(17) |                      |      |
| C(123)-C(103)-C(113) | 109.73(17) |                      |      |
| C(63)-C(103)-H(10E)  | 106.7      |                      |      |
| C(123)-C(103)-H(10E) | 106.7      |                      |      |
| C(113)-C(103)-H(10E) | 106.7      |                      |      |
| C(103)-C(113)-H(11G) | 109.5      |                      |      |
| C(103)-C(113)-H(11H) | 109.5      |                      |      |
| H(11G)-C(113)-H(11H) | 109.5      |                      |      |
| C(103)-C(113)-H(11I) | 109.5      |                      |      |
| H(11G)-C(113)-H(11I) | 109.5      |                      |      |
| H(11H)-C(113)-H(11I) | 109.5      |                      |      |
| C(103)-C(123)-H(12D) | 109.5      |                      |      |
| C(103)-C(123)-H(12E) | 109.5      |                      |      |
| H(12D)-C(123)-H(12E) | 109.5      |                      |      |
| C(103)-C(123)-H(12F) | 109.5      |                      |      |
| H(12D)-C(123)-H(12F) | 109.5      |                      |      |

Table 4. Anisotropic displacement parameters ( $\text{\AA}^2 \times 10^3$ ) for holkd21. The anisotropic displacement factor exponent takes the form:  $-2\pi^2 [ h^2 a^{*2} U_{11} + \dots + 2 h k a^* b^* U_{12} ]$

|      | $U_{11}$ | $U_{22}$ | $U_{33}$ | $U_{23}$ | $U_{13}$ | $U_{12}$ |
|------|----------|----------|----------|----------|----------|----------|
| Co1  | 22(1)    | 15(1)    | 18(1)    | -1(1)    | -6(1)    | 3(1)     |
| N11  | 17(1)    | 14(1)    | 16(1)    | -1(1)    | 1(1)     | 0(1)     |
| N21  | 17(1)    | 16(1)    | 16(1)    | 0(1)     | -2(1)    | 1(1)     |
| C1   | 22(1)    | 20(1)    | 20(1)    | 0(1)     | -3(1)    | 1(1)     |
| C2   | 29(1)    | 20(1)    | 24(1)    | 0(1)     | -6(1)    | 2(1)     |
| C3   | 27(1)    | 21(1)    | 25(1)    | -1(1)    | -2(1)    | 4(1)     |
| C4   | 30(1)    | 24(1)    | 25(1)    | 5(1)     | -3(1)    | 6(1)     |
| C5   | 34(1)    | 24(1)    | 21(1)    | 2(1)     | -5(1)    | 4(1)     |
| C6   | 34(1)    | 20(1)    | 20(1)    | 0(1)     | -2(1)    | 5(1)     |
| C11  | 19(1)    | 21(1)    | 16(1)    | 1(1)     | -2(1)    | 2(1)     |
| C21  | 14(1)    | 19(1)    | 15(1)    | 1(1)     | 2(1)     | 1(1)     |
| C31  | 19(1)    | 16(1)    | 17(1)    | 2(1)     | -2(1)    | 4(1)     |
| C41  | 17(1)    | 15(1)    | 18(1)    | 0(1)     | 1(1)     | 2(1)     |
| C51  | 24(1)    | 16(1)    | 20(1)    | 0(1)     | -4(1)    | 4(1)     |
| C61  | 27(1)    | 32(1)    | 20(1)    | 5(1)     | -3(1)    | -3(1)    |
| C71  | 17(1)    | 33(1)    | 25(1)    | -1(1)    | -3(1)    | 4(1)     |
| C81  | 26(1)    | 27(1)    | 23(1)    | -4(1)    | -10(1)   | 4(1)     |
| C91  | 29(1)    | 23(1)    | 32(1)    | -3(1)    | -1(1)    | 9(1)     |
| C101 | 31(1)    | 18(1)    | 25(1)    | 4(1)     | -4(1)    | 0(1)     |
| C111 | 34(1)    | 16(1)    | 26(1)    | -2(1)    | -5(1)    | 1(1)     |
| C12  | 14(1)    | 18(1)    | 16(1)    | -1(1)    | -4(1)    | 1(1)     |
| C22  | 16(1)    | 20(1)    | 17(1)    | -2(1)    | -4(1)    | 0(1)     |
| C32  | 21(1)    | 24(1)    | 20(1)    | -5(1)    | -2(1)    | 4(1)     |
| C42  | 27(1)    | 17(1)    | 26(1)    | -5(1)    | -6(1)    | 3(1)     |
| C52  | 24(1)    | 18(1)    | 29(1)    | 2(1)     | -5(1)    | -4(1)    |
| C62  | 16(1)    | 20(1)    | 21(1)    | 1(1)     | -3(1)    | 0(1)     |
| C72  | 18(1)    | 25(1)    | 23(1)    | -4(1)    | 4(1)     | -2(1)    |
| C82  | 22(1)    | 50(1)    | 36(1)    | 3(1)     | -2(1)    | -8(1)    |
| C92  | 35(1)    | 34(1)    | 24(1)    | -1(1)    | 6(1)     | -2(1)    |
| C102 | 19(1)    | 21(1)    | 32(1)    | 4(1)     | 5(1)     | 0(1)     |
| C112 | 32(1)    | 44(1)    | 30(1)    | 1(1)     | 6(1)     | 4(1)     |

|      |       |       |       |       |       |       |
|------|-------|-------|-------|-------|-------|-------|
| C122 | 20(1) | 69(2) | 44(2) | 6(1)  | 5(1)  | -5(1) |
| C13  | 21(1) | 13(1) | 15(1) | 0(1)  | -2(1) | 2(1)  |
| C23  | 21(1) | 16(1) | 20(1) | 0(1)  | 0(1)  | 0(1)  |
| C33  | 31(1) | 23(1) | 17(1) | 2(1)  | 1(1)  | -2(1) |
| C43  | 31(1) | 28(1) | 18(1) | 5(1)  | -9(1) | -7(1) |
| C53  | 20(1) | 22(1) | 26(1) | 4(1)  | -4(1) | -5(1) |
| C63  | 19(1) | 14(1) | 20(1) | 3(1)  | -2(1) | -1(1) |
| C73  | 19(1) | 25(1) | 21(1) | -2(1) | 2(1)  | 1(1)  |
| C83  | 25(1) | 25(1) | 41(1) | -4(1) | 6(1)  | -4(1) |
| C93  | 30(1) | 30(1) | 34(1) | -6(1) | 10(1) | 4(1)  |
| C103 | 19(1) | 22(1) | 25(1) | 0(1)  | 2(1)  | 0(1)  |
| C113 | 25(1) | 40(1) | 42(1) | 10(1) | 9(1)  | 8(1)  |
| C123 | 37(1) | 28(1) | 24(1) | 6(1)  | 9(1)  | 3(1)  |

---

Table 5. Hydrogen coordinates ( $\times 10^4$ ) and isotropic displacement parameters ( $\text{\AA}^2 \times 10^3$ ) for holkd21.

|      | x     | y    | z    | U(eq) |
|------|-------|------|------|-------|
| H1   | 3720  | 3051 | 3497 | 25    |
| H2A  | 5775  | 4180 | 3396 | 30    |
| H2B  | 5020  | 4006 | 4009 | 30    |
| H3A  | 2862  | 4398 | 3539 | 30    |
| H3B  | 3973  | 5048 | 3452 | 30    |
| H4A  | 4156  | 4703 | 2427 | 32    |
| H4B  | 2530  | 4808 | 2518 | 32    |
| H5A  | 2919  | 3689 | 1963 | 32    |
| H5B  | 2229  | 3511 | 2593 | 32    |
| H6A  | 4105  | 2672 | 2486 | 30    |
| H6B  | 5158  | 3359 | 2432 | 30    |
| H31  | 8021  | 640  | 4521 | 21    |
| H61A | 8970  | 1048 | 6035 | 40    |
| H61B | 8242  | 596  | 5457 | 40    |
| H61C | 7396  | 1238 | 5778 | 40    |
| H71A | 10948 | 1351 | 5368 | 38    |
| H71B | 10601 | 1762 | 4718 | 38    |
| H71C | 10136 | 912  | 4803 | 38    |
| H81A | 9861  | 2265 | 5946 | 39    |
| H81B | 8312  | 2561 | 5753 | 39    |
| H81C | 9553  | 2758 | 5334 | 39    |
| H91A | 8207  | -773 | 3451 | 42    |
| H91B | 8831  | -99  | 3876 | 42    |
| H91C | 8432  | 31   | 3152 | 42    |
| H10A | 6303  | -974 | 4150 | 38    |
| H10B | 5338  | -290 | 4324 | 38    |
| H10C | 6948  | -316 | 4585 | 38    |
| H11A | 5737  | -835 | 3093 | 38    |
| H11B | 5972  | -78  | 2724 | 38    |
| H11C | 4732  | -133 | 3168 | 38    |

|      |       |      |      |    |
|------|-------|------|------|----|
| H32  | 5441  | 4122 | 5583 | 26 |
| H42  | 6862  | 5055 | 5232 | 29 |
| H52  | 8568  | 4755 | 4580 | 28 |
| H72  | 5611  | 2169 | 5202 | 27 |
| H82A | 3757  | 2778 | 4619 | 54 |
| H82B | 3446  | 3267 | 5209 | 54 |
| H82C | 3192  | 2383 | 5211 | 54 |
| H92A | 6305  | 2544 | 6226 | 46 |
| H92B | 4728  | 2246 | 6183 | 46 |
| H92C | 5035  | 3125 | 6209 | 46 |
| H10D | 9300  | 2905 | 4040 | 28 |
| H11D | 8019  | 3598 | 3254 | 53 |
| H11E | 9655  | 3638 | 3165 | 53 |
| H11F | 8892  | 4333 | 3455 | 53 |
| H12A | 11410 | 3523 | 4092 | 66 |
| H12B | 10877 | 3559 | 4770 | 66 |
| H12C | 10729 | 4276 | 4327 | 66 |
| H33  | 5600  | 1168 | 1401 | 29 |
| H43  | 3170  | 1101 | 1331 | 32 |
| H53  | 1997  | 1230 | 2218 | 28 |
| H73  | 7857  | 1233 | 2800 | 26 |
| H83B | 7382  | 2493 | 2555 | 45 |
| H83C | 7436  | 2318 | 1834 | 45 |
| H83D | 8824  | 2249 | 2296 | 45 |
| H93A | 7905  | 333  | 1990 | 47 |
| H93B | 9197  | 899  | 2004 | 47 |
| H93C | 7894  | 1000 | 1498 | 47 |
| H10E | 3494  | 1766 | 3680 | 26 |
| H11G | 1127  | 1933 | 3646 | 53 |
| H11H | 849   | 1397 | 3057 | 53 |
| H11I | 1577  | 2193 | 2986 | 53 |
| H12D | 2282  | 816  | 4152 | 44 |
| H12E | 3712  | 504  | 3924 | 44 |
| H12F | 2257  | 324  | 3535 | 44 |
